# Supplementary material for: Chromosome-naïve global networks of initiators of hybrid assembly pathways of endogenous multiprotein complexes
Source: Research Square preprint supplement (doi:10.21203/rs.3.rs-8494003/v1), 2026-01-05
Supplement: Supplementary file 1 [file aa01986f81403ad174f02853.xlsx]

## Sheet: DataSetsSummary
Summary statistics of primates' genomic loci analyzed in this study.
TFBS (Jaspar 2022) and TF binding (UniBind) analyses
Species genome	Number of loci per query (TFBS analyses)	Number of loci	Number of TFBS	Number of analyzed loci	TFBS per locus	Mean locus size	TFBs density per 1 Kb	STDEV.P	Variation coefficient (%)	Description						Remarks
Macaque (rheMac8/hg19)	800	37205	74414026	37205	2000.11	510.993	3916	203	5.18386	Macaque brain development regulatory regions						200627	Total genomic loci
Chimpanzee (PanTro4/hg19)	400	9836	21846428	9836	2221.07	542	4097.91	201	4.90494	Chimp-biased brain development regulatory regions						49667	Control sets of genomic loci
Modern Humans (hg19)	400	8099	18735333	8099	2313.29	528.967	4373.22	154	3.52143	Human-biased brain development regulatory regions						150960	Regulatory loci
Modern Humans (hg19)	300	1619	3308235	1619	2043.38	666.016	3068.07	54	1.76007	Human-specific hESC functional enhancers (FE)
Modern Humans (hg19)	400	7945	19530878	7945	2458.26	671.091	3663.08	148	4.04031	hESC core module functional enhancers
Modern Humans (hg19)	300	2061	5586064	2061	2710.37	702.304	3859.25	114	2.95394	hESC invariant set of FE of the core module
Modern Humans (hg19)	400	3636	8338050	3636	2293.19	666.814	3439.03	62	1.80283	hESC invariant set of FE of the extended module
Modern Humans (hg19)	150	587	363038	587	618.463	200	3092.32	136	4.398	Human-specific CTCF binding sites
Modern Humans (hg19)	400	2365	1531548	2365	647.589	200	3237.95	73	2.25452	Human-specific POU5F1 binding sites
Modern Humans (hg19)	200	823	604160	823	734.095	200	3670.47	317	8.63649	Human-specific NANOG binding sites
Modern Humans (hg38)	20	606	1902719	606	3139.8	878.578	3573.73	64	1.79085	LTR5_Hs human embryo regulatory LTRs
Modern Humans (hg38)	30	735	15521619	735	21117.8	5854.24	3607.28	20	0.554435	LTR7 human embryo regulatory LTRs (full length LTR7.HERVH)
Modern Humans (hg38)	40	802	13268836	802	16544.7	4557.24	3630.42	35	0.964076	LTR7 human embryo regulatory LTRs (truncated LTR7.HERVH)
Modern Humans (hg38)	30	1817	2490084	1817	1370.44	349.047	3926.22	89	2.26681	LTR7 human embryo regulatory LTRs (solo LTR7)
Modern Humans (hg38)	100	2416	837034	500	1674.07	408.372	4099.37	37	0.902578	MLT2A1 human embryo regulatory LTRs
Modern Humans (hg38)	100	3069	1068584	600	1780.97	482.468	3691.38	46	1.24615	MLT2A2 human embryo regulatory LTRs
Modern Humans (hg38)	100	749	1580599	749	2110.28	765.666	2756.13	1065	38.6411	SVA regulatory loci (human iPSC & hippocampal intermediate progenitors)
Modern Humans (hg19)	at least 5	160	141074	160	881.712	228.042	3866.44	206.452	5.3396	SINE/Alu regulatory loci (human hippocampal intermediate progenitors)
Modern Humans (hg19)	at least 5	483	1046464	483	2166.59	623.614	3474.25	431.783	12.4281	LTR regulatory loci (human hippocampal intermediate progenitors)
Modern Humans (hg19)	at least 5	488	3987485	488	8171.08	2197.97	3717.56	401.384	10.797	LINE regulatory loci (human hippocampal intermediate progenitors)
Modern Humans (hg38)	500	3005	2499242	3000	833.081	251.242	3315.85	10	0.301581	Control ATAc-seq regions
Transcriptiojn factors binding analyses (UniBind)
Human brain active enhancers (primary cells)		24218								controls	49667
Human brain non-active enhancers (primary cells)		22152	control sequences							All loci	200627
Human brain active enhancers (brain organoids)		23832
Human brain non-active enhancers (braio organoids)		20070	control sequences
RECE		888
Conserved on primate lineage control sequences (aligned to RECE)		4440	control sequences
HAQERs		2726
HARs		3168
de novo HSRS		10393
LINE1 loci transpositionally active in human genome		234
		200627
LTR5_Hs human embryo regulatory LTRs		606
LTR7 human embryo regulatory LTRs (full length LTR7.HERVH)		735
LTR7 human embryo regulatory LTRs (truncated LTR7.HERVH)		802
LTR7 human embryo regulatory LTRs (solo LTR7)		1817
MLT2A1 human embryo regulatory LTRs		2416
MLT2A2 human embryo regulatory LTRs		3069
SVA regulatory loci (human iPSC & hippocampal intermediate progenitors)		749
SINE/Alu regulatory loci (human hippocampal intermediate progenitors)		160
LTR regulatory loci (human hippocampal intermediate progenitors)		483
LINE regulatory loci (human hippocampal intermediate progenitors)		488

## Sheet: ltr5.hs
90 LTR5_Hs TFs	Term	Overlap	P-value	Adjusted P-value	Odds Ratio	Combined Score	Genes	Alan Brain Atlas up					43 ltr5.hs TFs		43 ltr5.hs TFs	Term	Overlap	P-value	Adjusted P-value	Odds Ratio	Combined Score	Genes	Alan Brain Atlas up						62 ltr5.hs TFs		62 ltr5.hs TFs	Term	Overlap	P-value	Adjusted P-value	Odds Ratio	Combined Score	Genes	Alan Brain Atlas up
	Medial amygdalar nucleus, posterodorsal part	8/301	6.38314e-05	0.0292988	6.53192	63.0936	FOXA1;AR;NR2F1;HNF1B;OTX2;GATA3;ESR1;FLI1	20 significant records					AR		from 90 TFs	Hindbrain	11/595	3.56919e-08	6.22823e-05	11.4032	195.546	NEUROD1;AR;MAX;MYC;GATA4;GATA3;POU5F1;KLF1;NR2F6;FOXA2;NFE2L2	223 significant records						AR		from 102 TFs	Hindbrain	12/595	2.39031e-07	0.000346779	7.96775	121.482	NEUROD1;AR;ELF4;MAX;MYC;GATA4;GATA3;POU5F1;KLF1;NR2F6;FOXA2;NFE2L2	221 significant records
	Medial amygdalar nucleus, posterodorsal part, sublayer a	8/301	6.38314e-05	0.0292988	6.53192	63.0936	FOXA1;AR;NR2F1;HNF1B;GATA3;GATA2;ESR1;FLI1						BHLHE40			Medial amygdalar nucleus, posterodorsal part	8/301	2.20093e-07	7.68124e-05	15.34	235.151	FOXA1;AR;NR2F1;OTX2;HNF1B;GATA3;ESR1;FLI1							BHLHE40			Medial amygdalar nucleus, posterodorsal part	9/301	3.54398e-07	0.000346779	11.425	169.694	FOXA1;AR;NR2F1;HNF1B;OTX2;GATA3;ESR1;FOXO1;FLI1
	Midbrain, motor related	8/301	6.38314e-05	0.0292988	6.53192	63.0936	FOXA1;TCF7L2;LEF1;EBF3;OTX2;GATA3;SPDEF;NR2F6						EBF3			Medial amygdalar nucleus, posterodorsal part, sublayer a	8/301	2.20093e-07	7.68124e-05	15.34	235.151	FOXA1;AR;NR2F1;HNF1B;GATA3;GATA2;ESR1;FLI1							CDX2			Gigantocellular reticular nucleus	8/301	4.0059e-06	0.000783955	9.933	123.445	AR;ELF4;MYC;HOXB13;RUNX1;KLF1;NR2F6;NFE2L2
	layer 6b of PaS	8/301	6.38314e-05	0.0292988	6.53192	63.0936	MNT;ERF;NR2F1;TCF4;NR3C1;MEF2D;ETV5;FLI1						EOMES			Midbrain, motor related	8/301	2.20093e-07	7.68124e-05	15.34	235.151	FOXA1;TCF7L2;LEF1;OTX2;EBF3;GATA3;SPDEF;NR2F6							EBF3			Medial amygdalar nucleus, posterodorsal part, sublayer a	8/301	4.0059e-06	0.000783955	9.933	123.445	FOXA1;AR;NR2F1;HNF1B;GATA3;GATA2;ESR1;FLI1
	Hindbrain	11/595	7.29551e-05	0.0292988	4.60781	43.8925	NEUROD1;AR;MAX;MYC;GATA4;GATA3;POU5F1;KLF1;NR2F6;FOXA2;NFE2L2						ERF			layer 6b of PaS	8/301	2.20093e-07	7.68124e-05	15.34	235.151	MNT;NR2F1;ERF;TCF4;NR3C1;MEF2D;ETV5;FLI1							EGR3			Medial amygdalar nucleus, posterodorsal part, sublayer b	8/301	4.0059e-06	0.000783955	9.933	123.445	FOXA1;AR;NR2F1;HNF1B;OTX2;GATA3;ESR1;FOXO1
	Brain stem	7/301	0.000419437	0.0421115	5.62708	43.7595	AR;TCF7L2;LEF1;OTX2;GATA3;NR2F6;NFE2L2						ERG			Brain stem	7/301	3.30341e-06	0.000288223	13.0046	164.126	TCF7L2;AR;LEF1;OTX2;GATA3;NR2F6;NFE2L2							ELF1			Medullary reticular nucleus, ventral part	8/301	4.0059e-06	0.000783955	9.933	123.445	EOMES;AR;ELF4;MYC;MYB;RARA;KLF1;NFE2L2
	Crus 1	7/301	0.000419437	0.0421115	5.62708	43.7595	NEUROD1;NFE2;MAX;MYOD1;HNF1A;POU5F1;FOXA2						ESR1			Crus 1	7/301	3.30341e-06	0.000288223	13.0046	164.126	NEUROD1;NFE2;MAX;MYOD1;HNF1A;POU5F1;FOXA2							ELF4			Midbrain, motor related	8/301	4.0059e-06	0.000783955	9.933	123.445	FOXA1;TCF7L2;LEF1;EBF3;OTX2;GATA3;SPDEF;NR2F6
	Crus 1, molecular layer	7/301	0.000419437	0.0421115	5.62708	43.7595	NEUROD1;NFE2;MAX;MYOD1;HNF1A;POU5F1;FOXA2						ETV5			Crus 1, molecular layer	7/301	3.30341e-06	0.000288223	13.0046	164.126	NEUROD1;NFE2;MAX;MYOD1;HNF1A;POU5F1;FOXA2							EOMES			Postsubiculum, layer 3	8/301	4.0059e-06	0.000783955	9.933	123.445	ELF1;ERF;NR2F1;TCF4;GATA3;NR3C1;KLF4;ETV5
	Crus 2	7/301	0.000419437	0.0421115	5.62708	43.7595	NEUROD1;NFE2;MAX;MYOD1;KLF4;POU5F1;FOXA2						FLI1			Crus 2	7/301	3.30341e-06	0.000288223	13.0046	164.126	NEUROD1;NFE2;MAX;MYOD1;KLF4;POU5F1;FOXA2							ERF			Striatum-like amygdalar nuclei	8/301	4.0059e-06	0.000783955	9.933	123.445	SOX2;NR2F1;HNF1B;GATA3;ESR1;FOXO1;FLI1;NR2F6
	Crus 2, granular layer	7/301	0.000419437	0.0421115	5.62708	43.7595	NEUROD1;NFE2;MAX;MYOD1;KLF4;POU5F1;FOXA2						FOXA1			Crus 2, granular layer	7/301	3.30341e-06	0.000288223	13.0046	164.126	NEUROD1;NFE2;MAX;MYOD1;KLF4;POU5F1;FOXA2							ERG			layer 6b of PaS	8/301	4.0059e-06	0.000783955	9.933	123.445	MNT;ERF;NR2F1;TCF4;NR3C1;MEF2D;ETV5;FLI1
	Crus 2, molecular layer	7/301	0.000419437	0.0421115	5.62708	43.7595	NEUROD1;NFE2;MAX;MYOD1;KLF4;POU5F1;FOXA2						FOXA2			Crus 2, molecular layer	7/301	3.30341e-06	0.000288223	13.0046	164.126	NEUROD1;NFE2;MAX;MYOD1;KLF4;POU5F1;FOXA2							ESR1			Dorsal premammillary nucleus	9/482	1.66146e-05	0.00184035	6.98811	76.9058	FOXA1;SMAD2;AR;NFIL3;EBF3;ERG;GATA2;ESR1;FOSL2
	Flocculus, molecular layer	7/301	0.000419437	0.0421115	5.62708	43.7595	NEUROD1;NFE2;MAX;PBX2;GATA4;POU5F1;FOXA2						GATA2			Flocculus, molecular layer	7/301	3.30341e-06	0.000288223	13.0046	164.126	NEUROD1;NFE2;MAX;PBX2;GATA4;POU5F1;FOXA2							ETV5			Brain stem	7/301	3.94966e-05	0.00184035	8.5039	86.2235	AR;TCF7L2;LEF1;OTX2;GATA3;NR2F6;NFE2L2
	Gigantocellular reticular nucleus	7/301	0.000419437	0.0421115	5.62708	43.7595	AR;MYC;HOXB13;RUNX1;KLF1;NR2F6;NFE2L2						GATA3			Gigantocellular reticular nucleus	7/301	3.30341e-06	0.000288223	13.0046	164.126	AR;MYC;HOXB13;KLF1;NR2F6;RUNX1;NFE2L2							FLI1			Crus 1	7/301	3.94966e-05	0.00184035	8.5039	86.2235	NEUROD1;NFE2;MAX;MYOD1;HNF1A;POU5F1;FOXA2
	Medial amygdalar nucleus, posterodorsal part, sublayer b	7/301	0.000419437	0.0421115	5.62708	43.7595	FOXA1;AR;NR2F1;HNF1B;OTX2;GATA3;ESR1						GATA4			Medial amygdalar nucleus, posterodorsal part, sublayer b	7/301	3.30341e-06	0.000288223	13.0046	164.126	FOXA1;AR;NR2F1;OTX2;HNF1B;GATA3;ESR1							FOSL2			Crus 1, molecular layer	7/301	3.94966e-05	0.00184035	8.5039	86.2235	NEUROD1;NFE2;MAX;MYOD1;HNF1A;POU5F1;FOXA2
	Medullary reticular nucleus, ventral part	7/301	0.000419437	0.0421115	5.62708	43.7595	EOMES;AR;MYC;MYB;RARA;KLF1;NFE2L2						HNF1A			Medullary reticular nucleus, ventral part	7/301	3.30341e-06	0.000288223	13.0046	164.126	EOMES;AR;MYC;MYB;RARA;KLF1;NFE2L2							FOXA1			Crus 2	7/301	3.94966e-05	0.00184035	8.5039	86.2235	NEUROD1;NFE2;MAX;MYOD1;KLF4;POU5F1;FOXA2
	Postsubiculum, layer 3	7/301	0.000419437	0.0421115	5.62708	43.7595	ERF;NR2F1;TCF4;GATA3;NR3C1;KLF4;ETV5						HNF1B			Postsubiculum, layer 3	7/301	3.30341e-06	0.000288223	13.0046	164.126	NR2F1;ERF;TCF4;GATA3;NR3C1;KLF4;ETV5							FOXA2			Crus 2, granular layer	7/301	3.94966e-05	0.00184035	8.5039	86.2235	NEUROD1;NFE2;MAX;MYOD1;KLF4;POU5F1;FOXA2
	Primary visual area, layer 6a	7/301	0.000419437	0.0421115	5.62708	43.7595	BHLHE40;ERF;ERG;GATA3;NR3C1;KLF4;MEF2D						HOXB13			Primary visual area, layer 6a	7/301	3.30341e-06	0.000288223	13.0046	164.126	BHLHE40;ERF;GATA3;ERG;NR3C1;KLF4;MEF2D							FOXA3			Crus 2, molecular layer	7/301	3.94966e-05	0.00184035	8.5039	86.2235	NEUROD1;NFE2;MAX;MYOD1;KLF4;POU5F1;FOXA2
	Striatum-like amygdalar nuclei	7/301	0.000419437	0.0421115	5.62708	43.7595	SOX2;NR2F1;HNF1B;GATA3;ESR1;FLI1;NR2F6						KLF1			Striatum-like amygdalar nuclei	7/301	3.30341e-06	0.000288223	13.0046	164.126	SOX2;NR2F1;HNF1B;GATA3;ESR1;FLI1;NR2F6							FOXO1			Flocculus, molecular layer	7/301	3.94966e-05	0.00184035	8.5039	86.2235	NEUROD1;NFE2;MAX;PBX2;GATA4;POU5F1;FOXA2
	layer 4 of CCx	7/301	0.000419437	0.0421115	5.62708	43.7595	SOX17;VDR;ERF;TCF4;HNF1A;GATA2;ETV5						KLF4			layer 4 of CCx	7/301	3.30341e-06	0.000288223	13.0046	164.126	SOX17;VDR;ERF;TCF4;HNF1A;GATA2;ETV5							GATA1			Medial amygdalar nucleus, posterodorsal part, sublayer c	7/301	3.94966e-05	0.00184035	8.5039	86.2235	AR;NR2F1;HNF1B;OTX2;GATA3;ESR1;FOXO1
	posteromedial visual area, layer 6a	7/301	0.000419437	0.0421115	5.62708	43.7595	MNT;BHLHE40;ERF;ERG;GATA2;KLF4;MEF2D						LEF1			posteromedial visual area, layer 6a	7/301	3.30341e-06	0.000288223	13.0046	164.126	MNT;BHLHE40;ERF;ERG;GATA2;KLF4;MEF2D							GATA2			Medulla	7/301	3.94966e-05	0.00184035	8.5039	86.2235	AR;ELF4;MYC;PHOX2B;KLF1;NR2F6;NFE2L2
													MAX			Ansiform lobule	6/301	4.21859e-05	0.00175272	10.8082	108.876	NEUROD1;NFE2;MAX;MYOD1;POU5F1;FOXA2							GATA3			Medullary reticular nucleus	7/301	3.94966e-05	0.00184035	8.5039	86.2235	AR;ELF4;MYC;MYB;RARA;KLF1;NFE2L2
													MEF2D			Crus 1, granular layer	6/301	4.21859e-05	0.00175272	10.8082	108.876	NEUROD1;NFE2;MAX;MYOD1;HNF1A;FOXA2							GATA4			Orbital area, lateral part	7/301	3.94966e-05	0.00184035	8.5039	86.2235	EOMES;SOX17;HNF4G;PRDM1;GATA1;FLI1;FOXA3
													MNT			Flocculus	6/301	4.21859e-05	0.00175272	10.8082	108.876	NEUROD1;NFE2;MAX;GATA4;POU5F1;FOXA2							HNF1A			Orbital area, lateral part, layer 1	7/301	3.94966e-05	0.00184035	8.5039	86.2235	EOMES;SOX17;HNF4G;PRDM1;HNF1A;GATA1;FOXA3
													MYB			Hemispheric regions	6/301	4.21859e-05	0.00175272	10.8082	108.876	NEUROD1;NFE2;MAX;MYOD1;POU5F1;FOXA2							HNF1B			Orbital area, lateral part, layer 2/3	7/301	3.94966e-05	0.00184035	8.5039	86.2235	EOMES;SOX17;HNF4G;PRDM1;GATA1;FLI1;FOXA3
													MYC			Medial amygdalar nucleus, posterodorsal part, sublayer c	6/301	4.21859e-05	0.00175272	10.8082	108.876	AR;NR2F1;OTX2;HNF1B;GATA3;ESR1							HNF4G			Primary visual area	7/301	3.94966e-05	0.00184035	8.5039	86.2235	EGR3;KLF5;BHLHE40;ERF;NR3C1;KLF4;NR2F6
													MYOD1			Medullary reticular nucleus	6/301	4.21859e-05	0.00175272	10.8082	108.876	AR;MYC;MYB;RARA;KLF1;NFE2L2							HOXB13			Primary visual area, layer 6a	7/301	3.94966e-05	0.00184035	8.5039	86.2235	BHLHE40;ERF;ERG;GATA3;NR3C1;KLF4;MEF2D
													NEUROD1			Paraflocculus	6/301	4.21859e-05	0.00175272	10.8082	108.876	NEUROD1;NFE2;MAX;MYOD1;POU5F1;FOXA2							KLF1			intermediate stratum of Hb	7/301	3.94966e-05	0.00184035	8.5039	86.2235	TCF7L2;ELF1;REST;WT1;LEF1;MITF;OTX2
													NFE2			Paraflocculus, granular layer	6/301	4.21859e-05	0.00175272	10.8082	108.876	NEUROD1;NFE2;MAX;MYOD1;POU5F1;FOXA2							KLF4			layer 3 of OCx	7/301	3.94966e-05	0.00184035	8.5039	86.2235	EGR3;KLF5;BHLHE40;ERF;HNF1A;NR3C1;KLF4
													NFE2L2			Purkinje cell layer of CbHCx	6/301	4.21859e-05	0.00175272	10.8082	108.876	NEUROD1;NFE2;MAX;MYOD1;POU5F1;FOXA2							KLF5			layer 4 of CCx	7/301	3.94966e-05	0.00184035	8.5039	86.2235	SOX17;VDR;ERF;TCF4;HNF1A;GATA2;ETV5
													NR2F1			Superior colliculus, motor related	6/301	4.21859e-05	0.00175272	10.8082	108.876	TCF7L2;LEF1;OTX2;GATA3;SPDEF;NR2F6							LEF1			layer 6a of PaS	7/301	3.94966e-05	0.00184035	8.5039	86.2235	ELF1;NR2F1;TCF4;NR3C1;KLF4;MEF2D;ETV5
													NR2F6			cerebellar hemisphere	6/301	4.21859e-05	0.00175272	10.8082	108.876	NEUROD1;NFE2;MAX;MYOD1;POU5F1;FOXA2							MAX			liminal part of the r9 alar plate	7/301	3.94966e-05	0.00184035	8.5039	86.2235	ELF4;MYC;MYB;STAT3;PHOX2B;KLF1;NFE2L2
													NR3C1			cortex of cerebellar hemisphere	6/301	4.21859e-05	0.00175272	10.8082	108.876	NEUROD1;NFE2;MAX;MYOD1;POU5F1;FOXA2							MEF2D			mantle zone of r9Lim	7/301	3.94966e-05	0.00184035	8.5039	86.2235	ELF4;MYC;MYB;STAT3;PHOX2B;KLF1;NFE2L2
													OTX2			internal granular layer of CbHCx	6/301	4.21859e-05	0.00175272	10.8082	108.876	NEUROD1;NFE2;MAX;MYOD1;POU5F1;FOXA2							MITF			medial amygdala, posterodorsal part	7/301	3.94966e-05	0.00184035	8.5039	86.2235	FOXA1;AR;NR2F1;HNF1B;ESR1;FOXO1;FLI1
													PBX2			layer 6a of PaS	6/301	4.21859e-05	0.00175272	10.8082	108.876	NR2F1;TCF4;NR3C1;KLF4;MEF2D;ETV5							MNT			medial part of the lateral habenular nucleus	7/301	3.94966e-05	0.00184035	8.5039	86.2235	TCF7L2;ELF1;REST;WT1;LEF1;MITF;OTX2
													POU5F1			mantle zone of CbH	6/301	4.21859e-05	0.00175272	10.8082	108.876	NEUROD1;NFE2;MAX;MYOD1;POU5F1;FOXA2							MYB			periventricular stratum of r10Lim	7/301	3.94966e-05	0.00184035	8.5039	86.2235	ELF4;VDR;MYB;STAT3;HNF1B;PHOX2B;RUNX1
													RARA			medial amygdala, posterodorsal part	6/301	4.21859e-05	0.00175272	10.8082	108.876	FOXA1;AR;NR2F1;HNF1B;ESR1;FLI1							MYC			posteromedial visual area, layer 6a	7/301	3.94966e-05	0.00184035	8.5039	86.2235	MNT;BHLHE40;ERF;ERG;GATA2;KLF4;MEF2D
													RUNX1			molecular layer of CbHCx	6/301	4.21859e-05	0.00175272	10.8082	108.876	NEUROD1;NFE2;MAX;MYOD1;POU5F1;FOXA2							MYOD1			r10 part of basomedial reticular formation	7/301	3.94966e-05	0.00184035	8.5039	86.2235	ELF4;MYC;MYB;STAT3;HOXB13;RUNX1;NFE2L2
													SOX17			r1 alar plate	6/301	4.21859e-05	0.00175272	10.8082	108.876	NEUROD1;NFE2;MAX;MYOD1;POU5F1;FOXA2							NEUROD1			r10 part of gigantocellular reticular area	7/301	3.94966e-05	0.00184035	8.5039	86.2235	ELF4;MYC;RARA;HNF1A;HOXB13;RUNX1;NFE2L2
													SOX2			r10 part of gigantocellular reticular area	6/301	4.21859e-05	0.00175272	10.8082	108.876	MYC;RARA;HNF1A;HOXB13;RUNX1;NFE2L2							NFE2			r10 part of vagal motor nucleus	7/301	3.94966e-05	0.00184035	8.5039	86.2235	ELF4;VDR;MYB;STAT3;HNF1B;PHOX2B;RUNX1
													SPDEF			rhombomere 1	6/301	4.21859e-05	0.00175272	10.8082	108.876	NEUROD1;NFE2;MAX;MYOD1;POU5F1;FOXA2							NFE2L2			r9 alar plate	7/301	3.94966e-05	0.00184035	8.5039	86.2235	CDX2;WT1;MYC;MYB;PHOX2B;KLF1;NFE2L2
													TCF4			subpallial amygdala	6/301	4.21859e-05	0.00175272	10.8082	108.876	SOX2;AR;NR2F1;OTX2;ESR1;FLI1							NFIL3			subpallial amygdala	7/301	3.94966e-05	0.00184035	8.5039	86.2235	SOX2;AR;NR2F1;OTX2;ESR1;FOXO1;FLI1
													TCF7L2			superficial stratum of cerebellar hemisphere	6/301	4.21859e-05	0.00175272	10.8082	108.876	NEUROD1;NFE2;MAX;MYOD1;POU5F1;FOXA2							NR2F1			ventral reuniens nucleus	7/301	3.94966e-05	0.00184035	8.5039	86.2235	SOX2;TCF7L2;ELF1;REST;LEF1;SOX13;ERG
													VDR			Midbrain	6/404	0.000212046	0.00860512	7.96917	67.4089	FOXA1;TCF7L2;LEF1;OTX2;GATA3;SPDEF							NR2F6			Ansiform lobule	6/301	0.000334917	0.00720255	7.13426	57.0857	NEUROD1;NFE2;MAX;MYOD1;POU5F1;FOXA2
																Cerebellar cortex	5/301	0.000450004	0.00957631	8.73978	67.3509	NEUROD1;NFE2;MAX;POU5F1;FOXA2							NR3C1			Anterior olfactory nucleus, dorsal part	6/301	0.000334917	0.00720255	7.13426	57.0857	SOX17;HNF4G;PRDM1;HNF1A;GATA1;FOXA3
																Cerebellum	5/301	0.000450004	0.00957631	8.73978	67.3509	NEUROD1;NFE2;MAX;POU5F1;FOXA2							OTX2			Anterior olfactory nucleus, layer 1	6/301	0.000334917	0.00720255	7.13426	57.0857	SOX17;HNF4G;PRDM1;HNF1A;GATA1;FOXA3
																Cortical amygdalar area, posterior part, medial zone	5/301	0.000450004	0.00957631	8.73978	67.3509	NR2F1;ERF;HNF1B;ESR1;NR2F6							PBX2			Cortical amygdalar area, posterior part, medial zone	6/301	0.000334917	0.00720255	7.13426	57.0857	ERF;NR2F1;HNF1B;ESR1;FOXO1;NR2F6
																Flocculus, granular layer	5/301	0.000450004	0.00957631	8.73978	67.3509	NEUROD1;NFE2;MAX;GATA4;FOXA2							PHOX2B			Crus 1, granular layer	6/301	0.000334917	0.00720255	7.13426	57.0857	NEUROD1;NFE2;MAX;MYOD1;HNF1A;FOXA2
																Medial amygdalar nucleus	5/301	0.000450004	0.00957631	8.73978	67.3509	NR2F1;HNF1B;GATA3;ESR1;FLI1							POU5F1			Flocculus	6/301	0.000334917	0.00720255	7.13426	57.0857	NEUROD1;NFE2;MAX;GATA4;POU5F1;FOXA2
																Medial amygdalar nucleus, anterodorsal part	5/301	0.000450004	0.00957631	8.73978	67.3509	SOX2;NR2F1;GATA3;ESR1;FLI1							PRDM1			Hemispheric regions	6/301	0.000334917	0.00720255	7.13426	57.0857	NEUROD1;NFE2;MAX;MYOD1;POU5F1;FOXA2
																Medial preoptic nucleus, lateral part	5/301	0.000450004	0.00957631	8.73978	67.3509	AR;MNT;ERG;KLF4;ESR1							RARA			Medial amygdalar nucleus	6/301	0.000334917	0.00720255	7.13426	57.0857	NR2F1;HNF1B;GATA3;ESR1;FOXO1;FLI1
																Medulla	5/301	0.000450004	0.00957631	8.73978	67.3509	AR;MYC;KLF1;NR2F6;NFE2L2							REST			Medial amygdalar nucleus, anterodorsal part	6/301	0.000334917	0.00720255	7.13426	57.0857	SOX2;NR2F1;GATA3;ESR1;FOXO1;FLI1
																Medulla, motor related	5/301	0.000450004	0.00957631	8.73978	67.3509	AR;MYC;MYB;KLF1;NFE2L2							RUNX1			Medulla, motor related	6/301	0.000334917	0.00720255	7.13426	57.0857	AR;ELF4;MYC;MYB;KLF1;NFE2L2
																Paraflocculus, molecular layer	5/301	0.000450004	0.00957631	8.73978	67.3509	NEUROD1;NFE2;GATA4;POU5F1;FOXA2							SMAD2			Orbital area, ventrolateral part	6/301	0.000334917	0.00720255	7.13426	57.0857	EOMES;SOX17;PRDM1;HNF1A;GATA1;FOXA3
																Paramedian lobule	5/301	0.000450004	0.00957631	8.73978	67.3509	NEUROD1;NFE2;MAX;POU5F1;FOXA2							SOX13			Orbital area, ventrolateral part, layer 1	6/301	0.000334917	0.00720255	7.13426	57.0857	EOMES;SOX17;PRDM1;HNF1A;GATA1;FOXA3
																Paramedian lobule, molecular layer	5/301	0.000450004	0.00957631	8.73978	67.3509	NEUROD1;NFE2;MAX;POU5F1;FOXA2							SOX17			Orbital area, ventrolateral part, layer 2/3	6/301	0.000334917	0.00720255	7.13426	57.0857	EOMES;SOX17;PRDM1;HNF1A;GATA1;FOXA3
																Posterolateral visual area, layer 6b	5/301	0.000450004	0.00957631	8.73978	67.3509	NFE2;NR2F1;ERF;GATA3;NR3C1							SOX2			Paraflocculus	6/301	0.000334917	0.00720255	7.13426	57.0857	NEUROD1;NFE2;MAX;MYOD1;POU5F1;FOXA2
																Pretectal region	5/301	0.000450004	0.00957631	8.73978	67.3509	TCF7L2;OTX2;GATA3;POU5F1;SPDEF							SPDEF			Paraflocculus, granular layer	6/301	0.000334917	0.00720255	7.13426	57.0857	NEUROD1;NFE2;MAX;MYOD1;POU5F1;FOXA2
																Primary visual area	5/301	0.000450004	0.00957631	8.73978	67.3509	BHLHE40;ERF;NR3C1;KLF4;NR2F6							STAT3			Posterolateral visual area, layer 6b	6/301	0.000334917	0.00720255	7.13426	57.0857	NFE2;KLF5;ERF;NR2F1;GATA3;NR3C1
																Primary visual area, layer 6b	5/301	0.000450004	0.00957631	8.73978	67.3509	ERF;GATA3;NR3C1;KLF4;MEF2D							TCF4			Presubiculum, layer 3	6/301	0.000334917	0.00720255	7.13426	57.0857	KLF5;TCF4;GATA3;NR3C1;ETV5;FOSL2
																Retrosplenial area, dorsal part, layer 6b	5/301	0.000450004	0.00957631	8.73978	67.3509	MNT;ERF;GATA2;MEF2D;FLI1							TCF7L2			Purkinje cell layer of CbHCx	6/301	0.000334917	0.00720255	7.13426	57.0857	NEUROD1;NFE2;MAX;MYOD1;POU5F1;FOXA2
																Simple lobule	5/301	0.000450004	0.00957631	8.73978	67.3509	NEUROD1;NFE2;MAX;POU5F1;FOXA2							VDR			Spinal nucleus of the trigeminal, interpolar part	6/301	0.000334917	0.00720255	7.13426	57.0857	AR;CDX2;GATA3;PHOX2B;NR2F6;NFE2L2
																Superior colliculus, motor related, intermediate gray layer	5/301	0.000450004	0.00957631	8.73978	67.3509	TCF7L2;LEF1;OTX2;GATA3;SPDEF							WT1			Superior colliculus, motor related	6/301	0.000334917	0.00720255	7.13426	57.0857	TCF7L2;LEF1;OTX2;GATA3;SPDEF;NR2F6
																cerebellar white matter	5/301	0.000450004	0.00957631	8.73978	67.3509	NEUROD1;NFE2;MAX;POU5F1;FOXA2										Visual areas	6/301	0.000334917	0.00720255	7.13426	57.0857	EGR3;KLF5;BHLHE40;ERF;NR3C1;KLF4
																hypothalamic amygdala	5/301	0.000450004	0.00957631	8.73978	67.3509	AR;NR2F1;HNF1B;ESR1;FLI1										anterior olfactory area, dorsal part	6/301	0.000334917	0.00720255	7.13426	57.0857	SOX17;HNF4G;PRDM1;HNF1A;GATA1;FOXA3
																intermediate part of r10B	5/301	0.000450004	0.00957631	8.73978	67.3509	VDR;MYC;MYB;RUNX1;NFE2L2										centromedian nucleus	6/301	0.000334917	0.00720255	7.13426	57.0857	SOX2;TCF7L2;REST;LEF1;MITF;RUNX1
																intermediate stratum of r10BM	5/301	0.000450004	0.00957631	8.73978	67.3509	MYC;MYB;HOXB13;RUNX1;NFE2L2										cerebellar hemisphere	6/301	0.000334917	0.00720255	7.13426	57.0857	NEUROD1;NFE2;MAX;MYOD1;POU5F1;FOXA2
																intermediate stratum of r9Tr	5/301	0.000450004	0.00957631	8.73978	67.3509	MYC;MYB;RARA;KLF1;NFE2L2										cortex of cerebellar hemisphere	6/301	0.000334917	0.00720255	7.13426	57.0857	NEUROD1;NFE2;MAX;MYOD1;POU5F1;FOXA2
																layer 3 of OCx	5/301	0.000450004	0.00957631	8.73978	67.3509	BHLHE40;ERF;HNF1A;NR3C1;KLF4										hypothalamic amygdala	6/301	0.000334917	0.00720255	7.13426	57.0857	AR;NR2F1;HNF1B;ESR1;FOXO1;FLI1
																layer 5 of OCx	5/301	0.000450004	0.00957631	8.73978	67.3509	SOX17;BHLHE40;ERG;NR3C1;MEF2D										intermediate part of r10B	6/301	0.000334917	0.00720255	7.13426	57.0857	ELF4;VDR;MYC;MYB;RUNX1;NFE2L2
																layer 6 of PaS	5/301	0.000450004	0.00957631	8.73978	67.3509	NR2F1;ERF;TCF4;NR3C1;ETV5										intermediate stratum of r10BM	6/301	0.000334917	0.00720255	7.13426	57.0857	ELF4;MYC;MYB;HOXB13;RUNX1;NFE2L2
																layer 6b of RSC	5/301	0.000450004	0.00957631	8.73978	67.3509	NR2F1;ERF;NR3C1;KLF4;ETV5										internal granular layer of CbHCx	6/301	0.000334917	0.00720255	7.13426	57.0857	NEUROD1;NFE2;MAX;MYOD1;POU5F1;FOXA2
																mantle zone of AHy	5/301	0.000450004	0.00957631	8.73978	67.3509	AR;NR2F1;HNF1B;ESR1;FLI1										layer 1 of AOD cortex	6/301	0.000334917	0.00720255	7.13426	57.0857	SOX17;HNF4G;PRDM1;HNF1A;GATA1;FOXA3
																mantle zone of r10BI	5/301	0.000450004	0.00957631	8.73978	67.3509	VDR;MYC;MYB;RUNX1;NFE2L2										liminal part of the r10 alar plate	6/301	0.000334917	0.00720255	7.13426	57.0857	ELF4;MYC;MYB;STAT3;PHOX2B;NFE2L2
																medial amygdala, anterodorsal part	5/301	0.000450004	0.00957631	8.73978	67.3509	SOX2;AR;NR2F1;ESR1;FLI1										mantle zone of AHy	6/301	0.000334917	0.00720255	7.13426	57.0857	AR;NR2F1;HNF1B;ESR1;FOXO1;FLI1
																periventricular stratum of CbH	5/301	0.000450004	0.00957631	8.73978	67.3509	NEUROD1;NFE2;MAX;POU5F1;FOXA2										mantle zone of AOD	6/301	0.000334917	0.00720255	7.13426	57.0857	SOX17;HNF4G;PRDM1;HNF1A;GATA1;FOXA3
																posteromedial visual area, layer 5	5/301	0.000450004	0.00957631	8.73978	67.3509	MNT;SOX17;BHLHE40;ERF;KLF4										mantle zone of CbH	6/301	0.000334917	0.00720255	7.13426	57.0857	NEUROD1;NFE2;MAX;MYOD1;POU5F1;FOXA2
																posteromedial visual area, layer 6b	5/301	0.000450004	0.00957631	8.73978	67.3509	ERF;ERG;NR3C1;KLF4;MEF2D										mantle zone of r10BI	6/301	0.000334917	0.00720255	7.13426	57.0857	ELF4;VDR;MYC;MYB;RUNX1;NFE2L2
																r10 part of basomedial reticular formation	5/301	0.000450004	0.00957631	8.73978	67.3509	MYC;MYB;HOXB13;RUNX1;NFE2L2										mantle zone of r10Lim	6/301	0.000334917	0.00720255	7.13426	57.0857	ELF4;MYC;MYB;STAT3;PHOX2B;NFE2L2
																r9 part of basomedial reticular formation	5/301	0.000450004	0.00957631	8.73978	67.3509	MYC;HOXB13;KLF1;RUNX1;NFE2L2										medial amygdala, anterodorsal part	6/301	0.000334917	0.00720255	7.13426	57.0857	SOX2;AR;NR2F1;ESR1;FOXO1;FLI1
																sublayer 6b of OCx	5/301	0.000450004	0.00957631	8.73978	67.3509	ERF;ERG;NR3C1;KLF4;MEF2D										medial habenular nucleus	6/301	0.000334917	0.00720255	7.13426	57.0857	REST;SOX17;WT1;MITF;OTX2;GATA1
																superficial stratum of AHy	5/301	0.000450004	0.00957631	8.73978	67.3509	AR;NR2F1;HNF1B;ESR1;FLI1										molecular layer of CbHCx	6/301	0.000334917	0.00720255	7.13426	57.0857	NEUROD1;NFE2;MAX;MYOD1;POU5F1;FOXA2
																superficial stratum of IC	5/301	0.000450004	0.00957631	8.73978	67.3509	FOXA1;NEUROD1;TCF7L2;SOX17;OTX2										periventricular stratum of Hb	6/301	0.000334917	0.00720255	7.13426	57.0857	REST;SOX17;WT1;MITF;OTX2;GATA1
																Dorsal premammillary nucleus	6/482	0.000543387	0.0114242	6.63672	49.8928	FOXA1;AR;EBF3;ERG;GATA2;ESR1										periventricular stratum of r8Ve	6/301	0.000334917	0.00720255	7.13426	57.0857	ELF4;WT1;MITF;OTX2;GATA1;KLF1
																Bed nucleus of the anterior commissure	5/450	0.00268508	0.0308826	5.76937	34.1549	SOX2;AR;EBF3;ERG;ESR1										r1 alar plate	6/301	0.000334917	0.00720255	7.13426	57.0857	NEUROD1;NFE2;MAX;MYOD1;POU5F1;FOXA2
																Anterior amygdalar area	4/301	0.00391121	0.0308826	6.78926	37.639	NR2F1;HNF1B;GATA3;FLI1										r8 part of parvocellular medial vestibular nucleus	6/301	0.000334917	0.00720255	7.13426	57.0857	ELF4;WT1;MITF;OTX2;GATA1;KLF1
																Anteromedial visual area, layer 6a	4/301	0.00391121	0.0308826	6.78926	37.639	MNT;SOX17;BHLHE40;MEF2D										r9 part of basomedial reticular formation	6/301	0.000334917	0.00720255	7.13426	57.0857	ELF4;MYC;HOXB13;RUNX1;KLF1;NFE2L2
																Anteromedial visual area, layer 6b	4/301	0.00391121	0.0308826	6.78926	37.639	MNT;BHLHE40;MEF2D;FLI1										rhombomere 1	6/301	0.000334917	0.00720255	7.13426	57.0857	NEUROD1;NFE2;MAX;MYOD1;POU5F1;FOXA2
																Basic cell groups and regions	4/301	0.00391121	0.0308826	6.78926	37.639	NEUROD1;EOMES;GATA3;NR2F6										roof plate of p2 (epithalamic roofplate)	6/301	0.000334917	0.00720255	7.13426	57.0857	FOXA1;ELF1;REST;SOX17;OTX2;SPDEF
																Basomedial amygdalar nucleus	4/301	0.00391121	0.0308826	6.78926	37.639	NR2F1;HNF1B;GATA3;ESR1										superficial stratum of AHy	6/301	0.000334917	0.00720255	7.13426	57.0857	AR;NR2F1;HNF1B;ESR1;FOXO1;FLI1
																Central lateral nucleus of the thalamus	4/301	0.00391121	0.0308826	6.78926	37.639	TCF7L2;LEF1;OTX2;NR3C1										superficial stratum of AOD	6/301	0.000334917	0.00720255	7.13426	57.0857	SOX17;HNF4G;PRDM1;HNF1A;GATA1;FOXA3
																Cortical amygdalar area	4/301	0.00391121	0.0308826	6.78926	37.639	NR2F1;ERF;HNF1B;ESR1										superficial stratum of cerebellar hemisphere	6/301	0.000334917	0.00720255	7.13426	57.0857	NEUROD1;NFE2;MAX;MYOD1;POU5F1;FOXA2
																Cortical amygdalar area, posterior part	4/301	0.00391121	0.0308826	6.78926	37.639	NR2F1;ERF;HNF1B;ESR1										Parasubiculum	7/439	0.000406404	0.00864491	5.74672	44.8713	NFE2;ELF1;KLF5;WT1;TCF4;GATA3;POU5F1
																Dorsal nucleus raphe	4/301	0.00391121	0.0308826	6.78926	37.639	FOXA1;GATA3;ESR1;RUNX1										Presubiculum	7/508	0.000962415	0.0202521	4.93772	34.2978	ELF1;KLF5;PBX2;TCF4;GATA3;NR3C1;POU5F1
																Dorsomedial nucleus of the hypothalamus, ventral part	4/301	0.00391121	0.0308826	6.78926	37.639	AR;ERG;GATA2;ESR1										Cuneiform nucleus	7/530	0.00123019	0.0213364	4.72467	31.658	TCF7L2;WT1;HNF4G;GATA4;HNF1A;GATA3;HOXB13
																Hypothalamic medial zone	4/301	0.00391121	0.0308826	6.78926	37.639	AR;ERG;ESR1;NR2F6										Midbrain	6/404	0.00155003	0.0213364	5.26023	34.031	FOXA1;TCF7L2;LEF1;OTX2;GATA3;SPDEF
																Inferior colliculus, dorsal nucleus	4/301	0.00391121	0.0308826	6.78926	37.639	TCF7L2;MYOD1;OTX2;ERG										AOB, outer plexiform layer	5/301	0.00239858	0.0213364	5.82089	35.1167	EOMES;PRDM1;HNF1A;GATA1;FOXA3
																Intermediate reticular nucleus	4/301	0.00391121	0.0308826	6.78926	37.639	AR;MYC;KLF1;NFE2L2										Anterior amygdalar area	5/301	0.00239858	0.0213364	5.82089	35.1167	HNF4G;NR2F1;HNF1B;GATA3;FLI1
																Lateral group of the dorsal thalamus	4/301	0.00391121	0.0308826	6.78926	37.639	TCF7L2;LEF1;GATA3;NR3C1										Anterior olfactory nucleus	5/301	0.00239858	0.0213364	5.82089	35.1167	HNF4G;PRDM1;HNF1A;GATA1;FOXA3
																Lateral reticular nucleus, magnocellular part	4/301	0.00391121	0.0308826	6.78926	37.639	AR;MYC;KLF1;NFE2L2										Anterior olfactory nucleus, medial part	5/301	0.00239858	0.0213364	5.82089	35.1167	HNF1A;GATA2;GATA1;FOXA3;FOSL2
																Linear nucleus of the medulla	4/301	0.00391121	0.0308826	6.78926	37.639	AR;MYC;HNF1B;NFE2L2										Basic cell groups and regions	5/301	0.00239858	0.0213364	5.82089	35.1167	EOMES;NEUROD1;EGR3;GATA3;NR2F6
																Medial geniculate complex, medial part	4/301	0.00391121	0.0308826	6.78926	37.639	TCF7L2;LEF1;GATA3;FLI1										Cerebellar cortex	5/301	0.00239858	0.0213364	5.82089	35.1167	NEUROD1;NFE2;MAX;POU5F1;FOXA2
																Medial preoptic nucleus, medial part	4/301	0.00391121	0.0308826	6.78926	37.639	SOX2;AR;ERG;ESR1										Cerebellum	5/301	0.00239858	0.0213364	5.82089	35.1167	NEUROD1;NFE2;MAX;POU5F1;FOXA2
																Medulla, sensory related	4/301	0.00391121	0.0308826	6.78926	37.639	AR;GATA3;NR2F6;NFE2L2										Cortical amygdalar area	5/301	0.00239858	0.0213364	5.82089	35.1167	ERF;NR2F1;HNF1B;ESR1;FOXO1
																Midbrain reticular nucleus	4/301	0.00391121	0.0308826	6.78926	37.639	FOXA1;TCF7L2;GATA3;NR2F6										Cortical amygdalar area, posterior part	5/301	0.00239858	0.0213364	5.82089	35.1167	ERF;NR2F1;HNF1B;ESR1;FOXO1
																Midbrain reticular nucleus, retrorubral area	4/301	0.00391121	0.0308826	6.78926	37.639	FOXA1;GATA3;SPDEF;FOXA2										Dorsal nucleus raphe	5/301	0.00239858	0.0213364	5.82089	35.1167	FOXA1;REST;GATA3;ESR1;RUNX1
																Nucleus ambiguus	4/301	0.00391121	0.0308826	6.78926	37.639	AR;MYC;MYB;NFE2L2										Epithalamus	5/301	0.00239858	0.0213364	5.82089	35.1167	TCF7L2;WT1;MITF;OTX2;GATA1
																Nucleus ambiguus, ventral division	4/301	0.00391121	0.0308826	6.78926	37.639	AR;MYC;MYB;NFE2L2										Flocculus, granular layer	5/301	0.00239858	0.0213364	5.82089	35.1167	NEUROD1;NFE2;MAX;GATA4;FOXA2
																Nucleus of Darkschewitsch	4/301	0.00391121	0.0308826	6.78926	37.639	FOXA1;EBF3;NR2F6;FOXA2										Hypoglossal nucleus	5/301	0.00239858	0.0213364	5.82089	35.1167	ELF4;VDR;WT1;PHOX2B;RUNX1
																Nucleus of the lateral lemniscus, dorsal part	4/301	0.00391121	0.0308826	6.78926	37.639	NEUROD1;GATA4;GATA3;NR2F6										Medial group of the dorsal thalamus	5/301	0.00239858	0.0213364	5.82089	35.1167	SMAD2;TCF7L2;ELF1;REST;LEF1
																Paramedian lobule, granular layer	4/301	0.00391121	0.0308826	6.78926	37.639	NEUROD1;NFE2;MAX;FOXA2										Medial habenula	5/301	0.00239858	0.0213364	5.82089	35.1167	REST;WT1;MITF;OTX2;GATA1
																Parataenial nucleus	4/301	0.00391121	0.0308826	6.78926	37.639	SOX2;EOMES;TCF7L2;LEF1										Medial preoptic nucleus, lateral part	5/301	0.00239858	0.0213364	5.82089	35.1167	AR;MNT;ERG;KLF4;ESR1
																Pedunculopontine nucleus	4/301	0.00391121	0.0308826	6.78926	37.639	FOXA1;GATA3;HNF1A;SPDEF										Mediodorsal nucleus of thalamus	5/301	0.00239858	0.0213364	5.82089	35.1167	SMAD2;TCF7L2;ELF1;LEF1;OTX2
																Perireunensis nucleus	4/301	0.00391121	0.0308826	6.78926	37.639	SOX2;TCF7L2;LEF1;ERG										Mediodorsal nucleus of the thalamus, lateral part	5/301	0.00239858	0.0213364	5.82089	35.1167	SMAD2;TCF7L2;ELF1;LEF1;OTX2
																Pons	4/301	0.00391121	0.0308826	6.78926	37.639	MYC;GATA3;HOXB13;NR2F6										Mediodorsal nucleus of the thalamus, medial part	5/301	0.00239858	0.0213364	5.82089	35.1167	SMAD2;TCF7L2;ELF1;REST;LEF1
																Pons, sensory related	4/301	0.00391121	0.0308826	6.78926	37.639	NEUROD1;GATA3;SPDEF;NR2F6										Medulla, sensory related	5/301	0.00239858	0.0213364	5.82089	35.1167	AR;GATA3;PHOX2B;NR2F6;NFE2L2
																Pontine reticular nucleus, caudal part	4/301	0.00391121	0.0308826	6.78926	37.639	AR;MYC;HOXB13;KLF1										Nodulus (X)	5/301	0.00239858	0.0213364	5.82089	35.1167	NEUROD1;WT1;MITF;OTX2;FOXA3
																Posterior amygdalar nucleus	4/301	0.00391121	0.0308826	6.78926	37.639	NR2F1;HNF1B;GATA2;ESR1										Nucleus ambiguus	5/301	0.00239858	0.0213364	5.82089	35.1167	AR;CDX2;MYC;MYB;NFE2L2
																Presubiculum, layer 3	4/301	0.00391121	0.0308826	6.78926	37.639	TCF4;GATA3;NR3C1;ETV5										Nucleus ambiguus, ventral division	5/301	0.00239858	0.0213364	5.82089	35.1167	AR;CDX2;MYC;MYB;NFE2L2
																Simple lobule, granular layer	4/301	0.00391121	0.0308826	6.78926	37.639	NEUROD1;NFE2;MAX;FOXA2										Nucleus of the solitary tract	5/301	0.00239858	0.0213364	5.82089	35.1167	AR;ELF4;WT1;PHOX2B;KLF1
																Simple lobule, molecular layer	4/301	0.00391121	0.0308826	6.78926	37.639	NEUROD1;MAX;POU5F1;FOXA2										Nucleus of the solitary tract, medial part	5/301	0.00239858	0.0213364	5.82089	35.1167	AR;ELF4;WT1;PHOX2B;KLF1
																Spinal nucleus of the trigeminal, interpolar part	4/301	0.00391121	0.0308826	6.78926	37.639	AR;GATA3;NR2F6;NFE2L2										Nucleus x	5/301	0.00239858	0.0213364	5.82089	35.1167	CDX2;OTX2;HNF1A;PHOX2B;FOXA2
																Subiculum, dorsal part, pyramidal layer	4/301	0.00391121	0.0308826	6.78926	37.639	BHLHE40;TCF4;NR3C1;ETV5										Orbital area	5/301	0.00239858	0.0213364	5.82089	35.1167	EOMES;SOX17;PRDM1;GATA1;FOXA3
																Subparafascicular nucleus, magnocellular part	4/301	0.00391121	0.0308826	6.78926	37.639	TCF7L2;LEF1;EBF3;ERG										Orbital area, medial part, layer 2	5/301	0.00239858	0.0213364	5.82089	35.1167	REST;SOX17;PRDM1;HNF1A;GATA1
																Subparafascicular nucleus, parvicellular part	4/301	0.00391121	0.0308826	6.78926	37.639	TCF7L2;LEF1;GATA3;NR2F6										Paraflocculus, molecular layer	5/301	0.00239858	0.0213364	5.82089	35.1167	NEUROD1;NFE2;GATA4;POU5F1;FOXA2
																Superior colliculus, motor related, deep gray layer	4/301	0.00391121	0.0308826	6.78926	37.639	TCF7L2;LEF1;OTX2;GATA3										Paramedian lobule	5/301	0.00239858	0.0213364	5.82089	35.1167	NEUROD1;NFE2;MAX;POU5F1;FOXA2
																Superior colliculus, motor related, intermediate gray layer, sublayer b	4/301	0.00391121	0.0308826	6.78926	37.639	TCF7L2;OTX2;GATA3;SPDEF										Paramedian lobule, molecular layer	5/301	0.00239858	0.0213364	5.82089	35.1167	NEUROD1;NFE2;MAX;POU5F1;FOXA2
																Superior colliculus, motor related, intermediate white layer	4/301	0.00391121	0.0308826	6.78926	37.639	TCF7L2;LEF1;OTX2;GATA3										Parasolitary nucleus	5/301	0.00239858	0.0213364	5.82089	35.1167	AR;ELF4;OTX2;GATA1;KLF1
																Thalamus, sensory-motor cortex related	4/301	0.00391121	0.0308826	6.78926	37.639	TCF7L2;LEF1;NR2F1;GATA3										Parataenial nucleus	5/301	0.00239858	0.0213364	5.82089	35.1167	SOX2;EOMES;TCF7L2;REST;LEF1
																Ventral group of the dorsal thalamus	4/301	0.00391121	0.0308826	6.78926	37.639	TCF7L2;LEF1;NR2F1;NR2F6										Perihypoglossal nuclei	5/301	0.00239858	0.0213364	5.82089	35.1167	ELF4;WT1;OTX2;FOXA3;RUNX1
																Ventral posterior complex of the thalamus	4/301	0.00391121	0.0308826	6.78926	37.639	TCF7L2;LEF1;NR2F1;NR2F6										Perireunensis nucleus	5/301	0.00239858	0.0213364	5.82089	35.1167	SOX2;TCF7L2;ELF1;LEF1;ERG
																Ventral posterolateral nucleus of the thalamus	4/301	0.00391121	0.0308826	6.78926	37.639	TCF7L2;LEF1;NR2F1;NR2F6										Pons	5/301	0.00239858	0.0213364	5.82089	35.1167	ELF4;MYC;GATA3;HOXB13;NR2F6
																Visual areas	4/301	0.00391121	0.0308826	6.78926	37.639	BHLHE40;ERF;NR3C1;KLF4										Pons, sensory related	5/301	0.00239858	0.0213364	5.82089	35.1167	NEUROD1;GATA3;PHOX2B;SPDEF;NR2F6
																Zona incerta	4/301	0.00391121	0.0308826	6.78926	37.639	TCF7L2;LEF1;GATA3;SPDEF										Pontine reticular nucleus, caudal part	5/301	0.00239858	0.0213364	5.82089	35.1167	AR;ELF4;MYC;HOXB13;KLF1
																anterior pretectal nucleus, dorsal core part	4/301	0.00391121	0.0308826	6.78926	37.639	TCF7L2;LEF1;NR3C1;POU5F1										Posterior amygdalar nucleus	5/301	0.00239858	0.0213364	5.82089	35.1167	NR2F1;HNF1B;GATA2;ESR1;FOXO1
																anteroventral periventricular preoptic nucleus	4/301	0.00391121	0.0308826	6.78926	37.639	AR;KLF4;ESR1;NFE2L2										Presubiculum, layer 2	5/301	0.00239858	0.0213364	5.82089	35.1167	ELF1;KLF5;TCF4;GATA3;POU5F1
																basal reticular formation of p1	4/301	0.00391121	0.0308826	6.78926	37.639	FOXA1;TCF7L2;EBF3;FOXA2										Pretectal region	5/301	0.00239858	0.0213364	5.82089	35.1167	TCF7L2;OTX2;GATA3;POU5F1;SPDEF
																central lateral nucleus	4/301	0.00391121	0.0308826	6.78926	37.639	TCF7L2;LEF1;OTX2;NR3C1										Primary visual area, layer 6b	5/301	0.00239858	0.0213364	5.82089	35.1167	ERF;GATA3;NR3C1;KLF4;MEF2D
																central part of MPO	4/301	0.00391121	0.0308826	6.78926	37.639	AR;ERG;KLF4;ESR1										Retrosplenial area, dorsal part, layer 6b	5/301	0.00239858	0.0213364	5.82089	35.1167	MNT;ERF;GATA2;MEF2D;FLI1
																centromedian nucleus	4/301	0.00391121	0.0308826	6.78926	37.639	SOX2;TCF7L2;LEF1;RUNX1										Simple lobule	5/301	0.00239858	0.0213364	5.82089	35.1167	NEUROD1;NFE2;MAX;POU5F1;FOXA2
																deep gray layer of SC	4/301	0.00391121	0.0308826	6.78926	37.639	TCF7L2;LEF1;OTX2;EBF3										Subparafascicular nucleus, parvicellular part	5/301	0.00239858	0.0213364	5.82089	35.1167	TCF7L2;LEF1;HNF4G;GATA3;NR2F6
																dorsal cortical nucleus of inferior colliculus	4/301	0.00391121	0.0308826	6.78926	37.639	TCF7L2;OTX2;HNF1A;ERG										Superior colliculus, motor related, intermediate gray layer	5/301	0.00239858	0.0213364	5.82089	35.1167	TCF7L2;LEF1;OTX2;GATA3;SPDEF
																dorsal paracommissural tectal nucleus, m1 part	4/301	0.00391121	0.0308826	6.78926	37.639	TCF7L2;LEF1;OTX2;ERG										Supramammillary nucleus, lateral part	5/301	0.00239858	0.0213364	5.82089	35.1167	FOXA1;SMAD2;NFIL3;EBF3;ERG
																dorsal part of alar p3	4/301	0.00391121	0.0308826	6.78926	37.639	SOX2;EOMES;TCF7L2;LEF1										anterior paraventricular nucleus of thalamus	5/301	0.00239858	0.0213364	5.82089	35.1167	SOX2;TCF7L2;REST;LEF1;MITF
																dorsolateral part of m1A	4/301	0.00391121	0.0308826	6.78926	37.639	TCF7L2;SOX17;LEF1;OTX2										central part of MD	5/301	0.00239858	0.0213364	5.82089	35.1167	TCF7L2;ELF1;REST;LEF1;FOXA2
																dorsomedial preoptic area, superficial part	4/301	0.00391121	0.0308826	6.78926	37.639	AR;KLF4;SPDEF;NFE2L2										cerebellar white matter	5/301	0.00239858	0.0213364	5.82089	35.1167	NEUROD1;NFE2;MAX;POU5F1;FOXA2
																intercalated amygdaloid nuclei	4/301	0.00391121	0.0308826	6.78926	37.639	AR;NR2F1;HNF1B;ESR1										dorsal part of alar p2	5/301	0.00239858	0.0213364	5.82089	35.1167	REST;WT1;MITF;OTX2;GATA1
																intermediate stratum of PThE	4/301	0.00391121	0.0308826	6.78926	37.639	SOX2;EOMES;TCF7L2;LEF1										habenula (old epithalamus)	5/301	0.00239858	0.0213364	5.82089	35.1167	REST;WT1;MITF;OTX2;GATA1
																intermediate stratum of PcPL	4/301	0.00391121	0.0308826	6.78926	37.639	TCF7L2;LEF1;NR3C1;POU5F1										intermediate part of r6B	5/301	0.00239858	0.0213364	5.82089	35.1167	ELF4;WT1;SOX13;MITF;FOXA3
																intermediate stratum of p2B	4/301	0.00391121	0.0308826	6.78926	37.639	FOXA1;TCF7L2;LEF1;EBF3										intermediate stratum of r10Lim	5/301	0.00239858	0.0213364	5.82089	35.1167	ELF4;MYC;MYB;RARA;NFE2L2
																intermediate stratum of p3B	4/301	0.00391121	0.0308826	6.78926	37.639	FOXA1;TCF7L2;LEF1;EBF3										intermediate stratum of r7Lim	5/301	0.00239858	0.0213364	5.82089	35.1167	CDX2;MYC;MYB;KLF1;NFE2L2
																intermediate stratum of r10Lim	4/301	0.00391121	0.0308826	6.78926	37.639	MYC;MYB;RARA;NFE2L2										intermediate stratum of r8Lim	5/301	0.00239858	0.0213364	5.82089	35.1167	CDX2;MYC;MYB;KLF1;NFE2L2
																intermediate stratum of r10Tr	4/301	0.00391121	0.0308826	6.78926	37.639	MYC;RARA;HNF1B;KLF1										intermediate stratum of r8Ve	5/301	0.00239858	0.0213364	5.82089	35.1167	EBF3;OTX2;PHOX2B;SPDEF;KLF1
																intermediate stratum of r7Lim	4/301	0.00391121	0.0308826	6.78926	37.639	MYC;MYB;KLF1;NFE2L2										intermediate stratum of r9BM	5/301	0.00239858	0.0213364	5.82089	35.1167	ELF4;MYC;HOXB13;RUNX1;NFE2L2
																intermediate stratum of r8BL	4/301	0.00391121	0.0308826	6.78926	37.639	MYC;MYB;KLF1;NFE2L2										intermediate stratum of r9Tr	5/301	0.00239858	0.0213364	5.82089	35.1167	MYC;MYB;RARA;KLF1;NFE2L2
																intermediate stratum of r8Lim	4/301	0.00391121	0.0308826	6.78926	37.639	MYC;MYB;KLF1;NFE2L2										lateral (parvicellular) part of MD	5/301	0.00239858	0.0213364	5.82089	35.1167	SMAD2;TCF7L2;ELF1;LEF1;OTX2
																intermediate stratum of r8Ve	4/301	0.00391121	0.0308826	6.78926	37.639	OTX2;EBF3;SPDEF;KLF1										lateral pallium	5/301	0.00239858	0.0213364	5.82089	35.1167	EOMES;PRDM1;HNF1A;GATA1;FOXA3
																intermediate stratum of r9BM	4/301	0.00391121	0.0308826	6.78926	37.639	MYC;HOXB13;RUNX1;NFE2L2										lateral parabrachial nucleus	5/301	0.00239858	0.0213364	5.82089	35.1167	NEUROD1;SMAD2;MAX;ESR1;SPDEF
																intermediate stratum of r9Lim	4/301	0.00391121	0.0308826	6.78926	37.639	MYC;MYB;KLF1;NFE2L2										lateral part of the lateral habenular nucleus	5/301	0.00239858	0.0213364	5.82089	35.1167	ELF1;WT1;MITF;OTX2;GATA1
																intermediate tier of thalamus	4/301	0.00391121	0.0308826	6.78926	37.639	TCF7L2;LEF1;NR3C1;SPDEF										lateral septal nucleus, dorsal part	5/301	0.00239858	0.0213364	5.82089	35.1167	SOX2;EOMES;AR;EBF3;MITF
																intralaminar nuclei	4/301	0.00391121	0.0308826	6.78926	37.639	TCF7L2;LEF1;OTX2;NR3C1										layer 2 of AOD cortex	5/301	0.00239858	0.0213364	5.82089	35.1167	HNF4G;PRDM1;HNF1A;GATA1;FOXA3
																lateral SC part of the periaqueductal gray	4/301	0.00391121	0.0308826	6.78926	37.639	TCF7L2;OTX2;EBF3;HOXB13										layer 2 of RSC	5/301	0.00239858	0.0213364	5.82089	35.1167	KLF5;BHLHE40;ERF;NR3C1;SPDEF
																lateral parabrachial nucleus	4/301	0.00391121	0.0308826	6.78926	37.639	NEUROD1;MAX;ESR1;SPDEF										layer 3 of CCx	5/301	0.00239858	0.0213364	5.82089	35.1167	SOX17;BHLHE40;HNF4G;HNF1A;ETV5
																lateral septal nucleus, dorsal part	4/301	0.00391121	0.0308826	6.78926	37.639	SOX2;EOMES;AR;EBF3										layer 3 of PrS	5/301	0.00239858	0.0213364	5.82089	35.1167	ELF1;BHLHE40;TCF4;NR3C1;FOSL2
																layer 2 of RSC	4/301	0.00391121	0.0308826	6.78926	37.639	BHLHE40;ERF;NR3C1;SPDEF										layer 4 of OCx	5/301	0.00239858	0.0213364	5.82089	35.1167	EGR3;BHLHE40;ERF;KLF4;MEF2D
																layer 3 of CCx	4/301	0.00391121	0.0308826	6.78926	37.639	SOX17;BHLHE40;HNF1A;ETV5										layer 5 of OCx	5/301	0.00239858	0.0213364	5.82089	35.1167	SOX17;BHLHE40;ERG;NR3C1;MEF2D
																layer 4 of OCx	4/301	0.00391121	0.0308826	6.78926	37.639	BHLHE40;ERF;KLF4;MEF2D										layer 5 of PrS	5/301	0.00239858	0.0213364	5.82089	35.1167	BHLHE40;TCF4;NR3C1;ETV5;FOSL2
																layer 5 of PrS	4/301	0.00391121	0.0308826	6.78926	37.639	BHLHE40;TCF4;NR3C1;ETV5										layer 6 of PaS	5/301	0.00239858	0.0213364	5.82089	35.1167	ERF;NR2F1;TCF4;NR3C1;ETV5
																layer 6 of OCx	4/301	0.00391121	0.0308826	6.78926	37.639	BHLHE40;ERF;NR3C1;MEF2D										layer 6b of RSC	5/301	0.00239858	0.0213364	5.82089	35.1167	ERF;NR2F1;NR3C1;KLF4;ETV5
																layer 6 of RSC	4/301	0.00391121	0.0308826	6.78926	37.639	NR2F1;ERF;NR3C1;ETV5										liminal part of the r8 alar plate	5/301	0.00239858	0.0213364	5.82089	35.1167	CDX2;MYC;MYB;KLF1;NFE2L2
																liminal part of the r8 alar plate	4/301	0.00391121	0.0308826	6.78926	37.639	MYC;MYB;KLF1;NFE2L2										lower basal lateral hypothalamic area	5/301	0.00239858	0.0213364	5.82089	35.1167	SMAD2;NFIL3;EBF3;HOXB13;FOSL2
																liminal part of the r9 alar plate	4/301	0.00391121	0.0308826	6.78926	37.639	MYC;MYB;KLF1;NFE2L2										mantle zone of Hb	5/301	0.00239858	0.0213364	5.82089	35.1167	REST;WT1;MITF;OTX2;GATA1
																mantle zone of IC	4/301	0.00391121	0.0308826	6.78926	37.639	NEUROD1;TCF7L2;SOX17;OTX2										mantle zone of OCx	5/301	0.00239858	0.0213364	5.82089	35.1167	EGR3;BHLHE40;ERF;NR3C1;KLF4
																mantle zone of ITTh	4/301	0.00391121	0.0308826	6.78926	37.639	TCF7L2;LEF1;NR3C1;SPDEF										mantle zone of PrS	5/301	0.00239858	0.0213364	5.82089	35.1167	KLF5;PBX2;TCF4;NR3C1;POU5F1
																mantle zone of OCx	4/301	0.00391121	0.0308826	6.78926	37.639	BHLHE40;ERF;NR3C1;KLF4										mantle zone of r6BI	5/301	0.00239858	0.0213364	5.82089	35.1167	ELF4;WT1;SOX13;MITF;FOXA3
																mantle zone of PThE	4/301	0.00391121	0.0308826	6.78926	37.639	SOX2;EOMES;TCF7L2;LEF1										mantle zone of r8Lim	5/301	0.00239858	0.0213364	5.82089	35.1167	CDX2;MYC;MYB;KLF1;NFE2L2
																mantle zone of PrS	4/301	0.00391121	0.0308826	6.78926	37.639	PBX2;TCF4;NR3C1;POU5F1										mantle zone of r9Tr	5/301	0.00239858	0.0213364	5.82089	35.1167	CDX2;WT1;MYC;PHOX2B;NFE2L2
																mantle zone of p2B	4/301	0.00391121	0.0308826	6.78926	37.639	FOXA1;TCF7L2;LEF1;EBF3										mantle zone of the Fc	5/301	0.00239858	0.0213364	5.82089	35.1167	FOXA1;ELF1;REST;SOX17;GATA1
																mantle zone of r2Co	4/301	0.00391121	0.0308826	6.78926	37.639	NEUROD1;EOMES;NFE2;OTX2										medial amygdala, posteroventral part	5/301	0.00239858	0.0213364	5.82089	35.1167	HNF4G;HNF1B;ESR1;FOXO1;FLI1
																mantle zone of r8Lim	4/301	0.00391121	0.0308826	6.78926	37.639	MYC;MYB;KLF1;NFE2L2										mediodorsal nucleus	5/301	0.00239858	0.0213364	5.82089	35.1167	SMAD2;TCF7L2;ELF1;LEF1;OTX2
																mantle zone of r9Lim	4/301	0.00391121	0.0308826	6.78926	37.639	MYC;MYB;KLF1;NFE2L2										medullary hindbrain (medulla)	5/301	0.00239858	0.0213364	5.82089	35.1167	ELF4;MYC;MYB;KLF1;NFE2L2
																medullary hindbrain (medulla)	4/301	0.00391121	0.0308826	6.78926	37.639	MYC;MYB;KLF1;NFE2L2										nucleus of the stria terminalis, medial division, ventral part	5/301	0.00239858	0.0213364	5.82089	35.1167	AR;EBF3;PRDM1;ERG;ESR1
																mesomere 2 (preisthmus or caudal midbrain)	4/301	0.00391121	0.0308826	6.78926	37.639	FOXA1;TCF7L2;GATA4;EBF3										occipital cortex	5/301	0.00239858	0.0213364	5.82089	35.1167	EGR3;BHLHE40;ERF;NR3C1;KLF4
																nucleus of the stria medullaris (prethalamic)	4/301	0.00391121	0.0308826	6.78926	37.639	SOX2;EOMES;TCF7L2;LEF1										para-abducens nucleus	5/301	0.00239858	0.0213364	5.82089	35.1167	ELF4;MYB;SOX13;HNF1A;HOXB13
																nucleus of the stria terminalis, medial division, ventral part	4/301	0.00391121	0.0308826	6.78926	37.639	AR;EBF3;ERG;ESR1										periventricular stratum of CbH	5/301	0.00239858	0.0213364	5.82089	35.1167	NEUROD1;NFE2;MAX;POU5F1;FOXA2
																occipital cortex	4/301	0.00391121	0.0308826	6.78926	37.639	BHLHE40;ERF;NR3C1;KLF4										periventricular stratum of ITTh	5/301	0.00239858	0.0213364	5.82089	35.1167	TCF7L2;REST;LEF1;NR3C1;SPDEF
																periventricular part of StrSe	4/301	0.00391121	0.0308826	6.78926	37.639	SOX2;EOMES;AR;EBF3										periventricular stratum of r10Tr	5/301	0.00239858	0.0213364	5.82089	35.1167	ELF4;MYB;STAT3;PHOX2B;RUNX1
																periventricular stratum of ITTh	4/301	0.00391121	0.0308826	6.78926	37.639	TCF7L2;LEF1;NR3C1;SPDEF										periventricular stratum of r9BM	5/301	0.00239858	0.0213364	5.82089	35.1167	ELF4;VDR;WT1;RUNX1;NFE2L2
																periventricular stratum of r10Lim	4/301	0.00391121	0.0308826	6.78926	37.639	VDR;MYB;HNF1B;RUNX1										periventricular stratum of r9Lim	5/301	0.00239858	0.0213364	5.82089	35.1167	ELF4;VDR;WT1;PHOX2B;RUNX1
																posteromedial visual area	4/301	0.00391121	0.0308826	6.78926	37.639	MNT;SOX17;BHLHE40;KLF4										posteromedial visual area	5/301	0.00239858	0.0213364	5.82089	35.1167	MNT;EGR3;SOX17;BHLHE40;KLF4
																prepontine hindbrain	4/301	0.00391121	0.0308826	6.78926	37.639	NEUROD1;MAX;POU5F1;FOXA2										posteromedial visual area, layer 5	5/301	0.00239858	0.0213364	5.82089	35.1167	MNT;SOX17;BHLHE40;ERF;KLF4
																prethalamic eminence	4/301	0.00391121	0.0308826	6.78926	37.639	SOX2;EOMES;TCF7L2;LEF1										posteromedial visual area, layer 6b	5/301	0.00239858	0.0213364	5.82089	35.1167	ERF;ERG;NR3C1;KLF4;MEF2D
																r10 part of dorsal parvicellular reticular formation	4/301	0.00391121	0.0308826	6.78926	37.639	MYC;RARA;HNF1B;KLF1										r10 part of basointermediate reticular formation	5/301	0.00239858	0.0213364	5.82089	35.1167	ELF4;MYC;MYB;HNF4G;NFE2L2
																r10 part of vagal motor nucleus	4/301	0.00391121	0.0308826	6.78926	37.639	VDR;MYB;HNF1B;RUNX1										r10 part of solitary complex	5/301	0.00239858	0.0213364	5.82089	35.1167	ELF4;MYB;STAT3;PHOX2B;RUNX1
																r10 part of ventral parvicellular reticular formation	4/301	0.00391121	0.0308826	6.78926	37.639	MYC;MYB;RARA;NFE2L2										r10 part of ventral parvicellular reticular formation	5/301	0.00239858	0.0213364	5.82089	35.1167	ELF4;MYC;MYB;RARA;NFE2L2
																r2 part of cochlear sensory column	4/301	0.00391121	0.0308826	6.78926	37.639	NEUROD1;EOMES;NFE2;OTX2										r10 portion of the hypoglossal motor nucleus	5/301	0.00239858	0.0213364	5.82089	35.1167	ELF4;VDR;MYB;STAT3;RUNX1
																r7 part of ventral parvicellular reticular formation	4/301	0.00391121	0.0308826	6.78926	37.639	MYC;MYB;KLF1;NFE2L2										r7 alar plate	5/301	0.00239858	0.0213364	5.82089	35.1167	CDX2;MYC;PHOX2B;KLF1;NFE2L2
																r8 basal plate	4/301	0.00391121	0.0308826	6.78926	37.639	MYC;KLF1;RUNX1;NFE2L2										r7 part of ventral parvicellular reticular formation	5/301	0.00239858	0.0213364	5.82089	35.1167	CDX2;MYC;MYB;KLF1;NFE2L2
																r8 part of basolateral reticular formation	4/301	0.00391121	0.0308826	6.78926	37.639	MYC;MYB;KLF1;NFE2L2										r7 portion of the hypoglossal motor nucleus	5/301	0.00239858	0.0213364	5.82089	35.1167	REST;ELF4;WT1;OTX2;RUNX1
																r8 part of spinal vestibular nucleus	4/301	0.00391121	0.0308826	6.78926	37.639	OTX2;EBF3;SPDEF;KLF1										r8 alar plate	5/301	0.00239858	0.0213364	5.82089	35.1167	CDX2;MYC;PHOX2B;KLF1;NFE2L2
																r8 part of ventral parvicellular reticular formation	4/301	0.00391121	0.0308826	6.78926	37.639	MYC;MYB;KLF1;NFE2L2										r8 basal plate	5/301	0.00239858	0.0213364	5.82089	35.1167	ELF4;MYC;RUNX1;KLF1;NFE2L2
																r9 alar plate	4/301	0.00391121	0.0308826	6.78926	37.639	MYC;MYB;KLF1;NFE2L2										r8 part of spinal vestibular nucleus	5/301	0.00239858	0.0213364	5.82089	35.1167	EBF3;OTX2;PHOX2B;SPDEF;KLF1
																r9 basal plate	4/301	0.00391121	0.0308826	6.78926	37.639	MYC;KLF1;RUNX1;NFE2L2										r8 part of ventral parvicellular reticular formation	5/301	0.00239858	0.0213364	5.82089	35.1167	CDX2;MYC;MYB;KLF1;NFE2L2
																r9 part of gigantocellular reticular area	4/301	0.00391121	0.0308826	6.78926	37.639	MYB;HOXB13;RUNX1;NFE2L2										r9 basal plate	5/301	0.00239858	0.0213364	5.82089	35.1167	ELF4;MYC;RUNX1;KLF1;NFE2L2
																r9 part of trigeminal transition zone	4/301	0.00391121	0.0308826	6.78926	37.639	MYC;MYB;RARA;NFE2L2										r9 part of gigantocellular reticular area	5/301	0.00239858	0.0213364	5.82089	35.1167	ELF4;MYB;HOXB13;RUNX1;NFE2L2
																r9 part of ventral parvicellular reticular formation	4/301	0.00391121	0.0308826	6.78926	37.639	MYC;MYB;KLF1;NFE2L2										r9 part of the trigeminal column	5/301	0.00239858	0.0213364	5.82089	35.1167	CDX2;WT1;MYC;PHOX2B;NFE2L2
																retroreuniens nucleus	4/301	0.00391121	0.0308826	6.78926	37.639	SOX2;TCF7L2;LEF1;EBF3										r9 portion of the hypoglossal motor nucleus	5/301	0.00239858	0.0213364	5.82089	35.1167	ELF4;VDR;WT1;PHOX2B;RUNX1
																rhombomere 8	4/301	0.00391121	0.0308826	6.78926	37.639	MYC;MYB;KLF1;NFE2L2										r9 portion of vagal motor nucleus (postmigratory)	5/301	0.00239858	0.0213364	5.82089	35.1167	ELF4;VDR;WT1;PHOX2B;RUNX1
																rhombomere 9	4/301	0.00391121	0.0308826	6.78926	37.639	MYC;MYB;KLF1;NFE2L2										retroreuniens nucleus	5/301	0.00239858	0.0213364	5.82089	35.1167	SOX2;TCF7L2;REST;LEF1;EBF3
																roof plate of p2 (epithalamic roofplate)	4/301	0.00391121	0.0308826	6.78926	37.639	FOXA1;SOX17;OTX2;SPDEF										rhombomere 10	5/301	0.00239858	0.0213364	5.82089	35.1167	ELF4;MYC;MYB;STAT3;NFE2L2
																root	4/301	0.00391121	0.0308826	6.78926	37.639	NEUROD1;EOMES;GATA3;NR2F6										rhombomere 8	5/301	0.00239858	0.0213364	5.82089	35.1167	ELF4;MYC;MYB;KLF1;NFE2L2
																sublayer 6a of OCx	4/301	0.00391121	0.0308826	6.78926	37.639	BHLHE40;ERG;NR3C1;MEF2D										rhombomere 9	5/301	0.00239858	0.0213364	5.82089	35.1167	ELF4;MYC;MYB;KLF1;NFE2L2
																substantia nigra compacta, isthmic part	4/301	0.00391121	0.0308826	6.78926	37.639	FOXA1;SPDEF;KLF1;FOXA2										root	5/301	0.00239858	0.0213364	5.82089	35.1167	EOMES;NEUROD1;EGR3;GATA3;NR2F6
																superficial stratum of OCx (cortical plate/marginal zone)	4/301	0.00391121	0.0308826	6.78926	37.639	BHLHE40;ERF;NR3C1;KLF4										sublayer 6b of OCx	5/301	0.00239858	0.0213364	5.82089	35.1167	ERF;ERG;NR3C1;KLF4;MEF2D
																superficial stratum of PO1	4/301	0.00391121	0.0308826	6.78926	37.639	AR;KLF4;SPDEF;NFE2L2										superficial stratum of Hb	5/301	0.00239858	0.0213364	5.82089	35.1167	ELF1;WT1;MITF;OTX2;GATA1
																superficial stratum of PO2	4/301	0.00391121	0.0308826	6.78926	37.639	ERG;KLF4;ESR1;SPDEF										superficial stratum of IC	5/301	0.00239858	0.0213364	5.82089	35.1167	FOXA1;NEUROD1;TCF7L2;SOX17;OTX2
																superficial stratum of PrS (cortical plate/marginal zone)	4/301	0.00391121	0.0308826	6.78926	37.639	PBX2;TCF4;NR3C1;POU5F1										superficial stratum of OCx (cortical plate/marginal zone)	5/301	0.00239858	0.0213364	5.82089	35.1167	EGR3;BHLHE40;ERF;NR3C1;KLF4
																superficial stratum of m1AD	4/301	0.00391121	0.0308826	6.78926	37.639	TCF7L2;LEF1;OTX2;ERG										superficial stratum of PrS (cortical plate/marginal zone)	5/301	0.00239858	0.0213364	5.82089	35.1167	KLF5;PBX2;TCF4;NR3C1;POU5F1
																superficial stratum of the PBC	4/301	0.00391121	0.0308826	6.78926	37.639	NEUROD1;MAX;ESR1;SPDEF										superficial stratum of r10Tr	5/301	0.00239858	0.0213364	5.82089	35.1167	NFE2;CDX2;EBF3;PHOX2B;NFE2L2
																ventral posterolateral nucleus	4/301	0.00391121	0.0308826	6.78926	37.639	TCF7L2;LEF1;NR2F1;SPDEF										superficial stratum of the Fc	5/301	0.00239858	0.0213364	5.82089	35.1167	FOXA1;ELF1;REST;SOX17;GATA1
																ventral reuniens nucleus	4/301	0.00391121	0.0308826	6.78926	37.639	SOX2;TCF7L2;LEF1;ERG										superficial stratum of the PBC	5/301	0.00239858	0.0213364	5.82089	35.1167	NEUROD1;SMAD2;MAX;ESR1;SPDEF
																ventromedial preoptic nucleus	4/301	0.00391121	0.0308826	6.78926	37.639	ERG;KLF4;ESR1;SPDEF										Bed nucleus of the anterior commissure	6/450	0.00266221	0.0235744	4.70415	27.889	SOX2;AR;EBF3;PRDM1;ERG;ESR1
																Presubiculum	5/508	0.00450347	0.0353989	5.08894	27.4951	PBX2;TCF4;GATA3;NR3C1;POU5F1										Subiculum	5/389	0.00708425	0.0587273	4.46683	22.1103	AR;BHLHE40;GATA3;NR3C1;FOSL2
																Cuneiform nucleus	5/530	0.00538129	0.0421092	4.87018	25.4458	TCF7L2;GATA4;GATA3;HNF1A;HOXB13										Parafascicular nucleus	5/393	0.00738833	0.0587273	4.41988	21.6921	TCF7L2;LEF1;PRDM1;NR3C1;SPDEF
																Inferior colliculus	4/377	0.00859274	0.066939	5.38503	25.6157	NEUROD1;TCF7L2;SOX17;OTX2										Fasciola cinerea	5/435	0.0111517	0.0587273	3.9796	17.8929	FOXA1;ELF1;REST;SOX17;GATA1
																lateral posterior nucleus	5/602	0.00910253	0.0705952	4.26695	20.0513	TCF7L2;LEF1;OTX2;ERG;ESR1										AOB, glomerular layer	4/301	0.0141642	0.0587273	4.56078	19.4154	EOMES;MITF;PRDM1;GATA1
																Subiculum	4/389	0.00956607	0.0738619	5.21399	24.2426	AR;BHLHE40;GATA3;NR3C1										Anterior olfactory nucleus, external part	4/301	0.0141642	0.0587273	4.56078	19.4154	EOMES;PRDM1;HNF1A;GATA1
																Parafascicular nucleus	4/393	0.00990587	0.0761487	5.15932	23.8083	TCF7L2;LEF1;NR3C1;SPDEF										Anterior olfactory nucleus, lateral part	4/301	0.0141642	0.0587273	4.56078	19.4154	HNF4G;PRDM1;HNF1A;GATA1
																Medial preoptic nucleus	4/410	0.0114379	0.0777865	4.93899	22.0814	AR;MNT;ERG;ESR1										Anteromedial nucleus, dorsal part	4/301	0.0141642	0.0587273	4.56078	19.4154	SMAD2;TCF7L2;LEF1;MITF
																Parasubiculum	4/439	0.0143905	0.0777865	4.60289	19.5217	NFE2;TCF4;GATA3;POU5F1										Anteromedial visual area, layer 6a	4/301	0.0141642	0.0587273	4.56078	19.4154	MNT;SOX17;BHLHE40;MEF2D
																Olivary pretectal nucleus	4/514	0.0241456	0.0777865	3.91091	14.5629	FOXA1;SOX17;OTX2;SPDEF										Anteromedial visual area, layer 6b	4/301	0.0141642	0.0587273	4.56078	19.4154	MNT;BHLHE40;MEF2D;FLI1
																Anterior hypothalamic nucleus, anterior part	3/301	0.0267461	0.0777865	4.94773	17.9176	ERG;KLF4;ESR1										Basomedial amygdalar nucleus	4/301	0.0141642	0.0587273	4.56078	19.4154	NR2F1;HNF1B;GATA3;ESR1
																Anterior pretectal nucleus	3/301	0.0267461	0.0777865	4.94773	17.9176	TCF7L2;GATA3;POU5F1										Central lateral nucleus of the thalamus	4/301	0.0141642	0.0587273	4.56078	19.4154	TCF7L2;LEF1;OTX2;NR3C1
																Anteromedial visual area, layer 5	3/301	0.0267461	0.0777865	4.94773	17.9176	SOX17;BHLHE40;MEF2D										Central medial nucleus of the thalamus	4/301	0.0141642	0.0587273	4.56078	19.4154	SOX2;TCF7L2;REST;LEF1
																Anteroventral nucleus of thalamus	3/301	0.0267461	0.0777865	4.94773	17.9176	TCF7L2;LEF1;FOXA2										Cortical amygdalar area, posterior part, lateral zone	4/301	0.0141642	0.0587273	4.56078	19.4154	ERF;ESR1;FOXO1;NR2F6
																Anteroventral periventricular nucleus	3/301	0.0267461	0.0777865	4.94773	17.9176	AR;KLF4;ESR1										Dorsal motor nucleus of the vagus nerve	4/301	0.0141642	0.0587273	4.56078	19.4154	ELF4;WT1;PHOX2B;RUNX1
																Basomedial amygdalar nucleus, anterior part	3/301	0.0267461	0.0777865	4.94773	17.9176	NR2F1;HNF1B;GATA3										Dorsomedial nucleus of the hypothalamus, ventral part	4/301	0.0141642	0.0587273	4.56078	19.4154	AR;ERG;GATA2;ESR1
																Basomedial amygdalar nucleus, posterior part	3/301	0.0267461	0.0777865	4.94773	17.9176	NR2F1;HNF1B;ESR1										Entorhinal area, medial part, dorsal zone, layer 2	4/301	0.0141642	0.0587273	4.56078	19.4154	KLF5;GATA3;POU5F1;NR2F6
																Bed nuclei of the stria terminalis, anterior division	3/301	0.0267461	0.0777865	4.94773	17.9176	SOX2;AR;ESR1										Entorhinal area, medial part, ventral zone	4/301	0.0141642	0.0587273	4.56078	19.4154	KLF5;STAT3;ERF;PBX2
																Bed nuclei of the stria terminalis, anterior division, anteromedial area	3/301	0.0267461	0.0777865	4.94773	17.9176	SOX2;AR;ESR1										Entorhinal area, medial part, ventral zone, layer 3	4/301	0.0141642	0.0587273	4.56078	19.4154	KLF5;STAT3;ERF;PBX2
																Bed nuclei of the stria terminalis, posterior division	3/301	0.0267461	0.0777865	4.94773	17.9176	AR;NR2F1;ESR1										Frontal pole, layer 1	4/301	0.0141642	0.0587273	4.56078	19.4154	EOMES;HNF4G;MITF;PRDM1
																Bed nuclei of the stria terminalis, posterior division, interfascicular nucleus	3/301	0.0267461	0.0777865	4.94773	17.9176	AR;NR2F1;ESR1										Gracile nucleus	4/301	0.0141642	0.0587273	4.56078	19.4154	ELF4;WT1;POU5F1;KLF1
																Bed nuclei of the stria terminalis, posterior division, principal nucleus	3/301	0.0267461	0.0777865	4.94773	17.9176	SOX2;AR;ESR1										Hypothalamic medial zone	4/301	0.0141642	0.0587273	4.56078	19.4154	AR;ERG;ESR1;NR2F6
																Bed nuclei of the stria terminalis, posterior division, transverse nucleus	3/301	0.0267461	0.0777865	4.94773	17.9176	AR;NR2F1;ESR1										Inferior colliculus, dorsal nucleus	4/301	0.0141642	0.0587273	4.56078	19.4154	TCF7L2;MYOD1;OTX2;ERG
																Bed nucleus of the accessory olfactory tract	3/301	0.0267461	0.0777865	4.94773	17.9176	SOX17;GATA3;FLI1										Infralimbic area, layer 1	4/301	0.0141642	0.0587273	4.56078	19.4154	SMAD2;SOX17;VDR;PRDM1
																Central medial nucleus of the thalamus	3/301	0.0267461	0.0777865	4.94773	17.9176	SOX2;TCF7L2;LEF1										Infralimbic area, layer 2	4/301	0.0141642	0.0587273	4.56078	19.4154	SOX17;PRDM1;HNF1A;GATA1
																Cochlear nucleus, subpedunclular granular region	3/301	0.0267461	0.0777865	4.94773	17.9176	NEUROD1;NFE2;OTX2										Interanterodorsal nucleus of the thalamus	4/301	0.0141642	0.0587273	4.56078	19.4154	SOX2;SMAD2;TCF7L2;LEF1
																Copula pyramidis	3/301	0.0267461	0.0777865	4.94773	17.9176	NEUROD1;NFE2;MAX										Interanteromedial nucleus of the thalamus	4/301	0.0141642	0.0587273	4.56078	19.4154	SOX2;TCF7L2;REST;LEF1
																Copula pyramidis, granular layer	3/301	0.0267461	0.0777865	4.94773	17.9176	NEUROD1;NFE2;MAX										Intermediate reticular nucleus	4/301	0.0141642	0.0587273	4.56078	19.4154	AR;MYC;KLF1;NFE2L2
																Copula pyramidis, molecular layer	3/301	0.0267461	0.0777865	4.94773	17.9176	NEUROD1;NFE2;MAX										Intermediodorsal nucleus of the thalamus	4/301	0.0141642	0.0587273	4.56078	19.4154	TCF7L2;REST;LEF1;RUNX1
																Cortical amygdalar area, posterior part, lateral zone	3/301	0.0267461	0.0777865	4.94773	17.9176	ERF;ESR1;NR2F6										Koelliker-Fuse subnucleus	4/301	0.0141642	0.0587273	4.56078	19.4154	GATA3;FLI1;PHOX2B;SPDEF
																Cortical amygdalar area, posterior part, lateral zone, layer 3	3/301	0.0267461	0.0777865	4.94773	17.9176	NR2F1;HNF1B;ESR1										Lateral group of the dorsal thalamus	4/301	0.0141642	0.0587273	4.56078	19.4154	TCF7L2;LEF1;GATA3;NR3C1
																Cortical amygdalar area, posterior part, medial zone, layer 3	3/301	0.0267461	0.0777865	4.94773	17.9176	NR2F1;HNF1B;ESR1										Lateral habenula	4/301	0.0141642	0.0587273	4.56078	19.4154	TCF7L2;LEF1;MITF;OTX2
																Cortical subplate	3/301	0.0267461	0.0777865	4.94773	17.9176	NR2F1;GATA3;NR2F6										Lateral reticular nucleus, magnocellular part	4/301	0.0141642	0.0587273	4.56078	19.4154	AR;MYC;KLF1;NFE2L2
																Cuneate nucleus	3/301	0.0267461	0.0777865	4.94773	17.9176	AR;OTX2;KLF1										Linear nucleus of the medulla	4/301	0.0141642	0.0587273	4.56078	19.4154	AR;MYC;HNF1B;NFE2L2
																Declive (VI)	3/301	0.0267461	0.0777865	4.94773	17.9176	NEUROD1;MAX;MYOD1										Magnocellular reticular nucleus	4/301	0.0141642	0.0587273	4.56078	19.4154	AR;ELF4;FOXA3;NFE2L2
																Dorsal column nuclei	3/301	0.0267461	0.0777865	4.94773	17.9176	AR;OTX2;KLF1										Medial geniculate complex, medial part	4/301	0.0141642	0.0587273	4.56078	19.4154	TCF7L2;LEF1;GATA3;FLI1
																Dorsal part of the lateral geniculate complex	3/301	0.0267461	0.0777865	4.94773	17.9176	TCF7L2;LEF1;GATA3										Medial preoptic nucleus, medial part	4/301	0.0141642	0.0587273	4.56078	19.4154	SOX2;AR;ERG;ESR1
																Dorsomedial nucleus of the hypothalamus	3/301	0.0267461	0.0777865	4.94773	17.9176	SOX2;ERG;ESR1										Medial vestibular nucleus	4/301	0.0141642	0.0587273	4.56078	19.4154	MITF;GATA1;FOXA3;KLF1
																Dorsomedial nucleus of the hypothalamus, posterior part	3/301	0.0267461	0.0777865	4.94773	17.9176	SOX2;ERG;ESR1										Mediodorsal nucleus of the thalamus, central part	4/301	0.0141642	0.0587273	4.56078	19.4154	TCF7L2;ELF1;LEF1;OTX2
																Entorhinal area, lateral part, layer 2a	3/301	0.0267461	0.0777865	4.94773	17.9176	ERF;SPDEF;NR2F6										Midbrain reticular nucleus	4/301	0.0141642	0.0587273	4.56078	19.4154	FOXA1;TCF7L2;GATA3;NR2F6
																Entorhinal area, medial part, dorsal zone, layer 1	3/301	0.0267461	0.0777865	4.94773	17.9176	GATA3;POU5F1;NR2F6										Midbrain reticular nucleus, retrorubral area	4/301	0.0141642	0.0587273	4.56078	19.4154	FOXA1;GATA3;SPDEF;FOXA2
																Entorhinal area, medial part, dorsal zone, layer 2	3/301	0.0267461	0.0777865	4.94773	17.9176	GATA3;POU5F1;NR2F6										Midline group of the dorsal thalamus	4/301	0.0141642	0.0587273	4.56078	19.4154	SOX2;TCF7L2;REST;LEF1
																Geniculate group, dorsal thalamus	3/301	0.0267461	0.0777865	4.94773	17.9176	TCF7L2;LEF1;GATA3										Mus musculus	4/301	0.0141642	0.0587273	4.56078	19.4154	EOMES;NEUROD1;EGR3;ETV5
																Geniculate group, ventral thalamus	3/301	0.0267461	0.0777865	4.94773	17.9176	TCF7L2;LEF1;GATA3										Nodulus (X), molecular layer	4/301	0.0141642	0.0587273	4.56078	19.4154	WT1;MITF;OTX2;FOXA3
																Globus pallidus, internal segment	3/301	0.0267461	0.0777865	4.94773	17.9176	LEF1;GATA3;FLI1										Nucleus of Darkschewitsch	4/301	0.0141642	0.0587273	4.56078	19.4154	FOXA1;EBF3;NR2F6;FOXA2
																Hypothalamus	3/301	0.0267461	0.0777865	4.94773	17.9176	AR;ESR1;NR2F6										Nucleus of Roller	4/301	0.0141642	0.0587273	4.56078	19.4154	ELF4;WT1;OTX2;RUNX1
																Inferior colliculus, central nucleus	3/301	0.0267461	0.0777865	4.94773	17.9176	TCF7L2;SOX17;OTX2										Nucleus of reunions	4/301	0.0141642	0.0587273	4.56078	19.4154	SOX2;TCF7L2;REST;LEF1
																Inferior colliculus, external nucleus	3/301	0.0267461	0.0777865	4.94773	17.9176	NEUROD1;TCF7L2;SOX17										Nucleus of the lateral lemniscus, dorsal part	4/301	0.0141642	0.0587273	4.56078	19.4154	NEUROD1;GATA4;GATA3;NR2F6
																Interanterodorsal nucleus of the thalamus	3/301	0.0267461	0.0777865	4.94773	17.9176	SOX2;TCF7L2;LEF1										Nucleus of the lateral olfactory tract, pyramidal layer	4/301	0.0141642	0.0587273	4.56078	19.4154	HNF4G;GATA3;FLI1;NR2F6
																Interanteromedial nucleus of the thalamus	3/301	0.0267461	0.0777865	4.94773	17.9176	SOX2;TCF7L2;LEF1										Nucleus of the solitary tract, commissural part	4/301	0.0141642	0.0587273	4.56078	19.4154	ELF4;WT1;PHOX2B;RUNX1
																Interbrain	3/301	0.0267461	0.0777865	4.94773	17.9176	TCF7L2;LEF1;ESR1										Nucleus of the solitary tract, gelatinous part	4/301	0.0141642	0.0587273	4.56078	19.4154	ELF4;WT1;MITF;OTX2
																Intercalated amygdalar nucleus	3/301	0.0267461	0.0777865	4.94773	17.9176	NR2F1;HNF1B;GATA3										Nucleus of the trapezoid body	4/301	0.0141642	0.0587273	4.56078	19.4154	AR;ELF4;MYC;KLF1
																Intergeniculate leaflet of the lateral geniculate complex	3/301	0.0267461	0.0777865	4.94773	17.9176	TCF7L2;LEF1;GATA3										Nucleus prepositus	4/301	0.0141642	0.0587273	4.56078	19.4154	ELF4;WT1;OTX2;FOXA3
																Intermediodorsal nucleus of the thalamus	3/301	0.0267461	0.0777865	4.94773	17.9176	TCF7L2;LEF1;RUNX1										Parabrachial nucleus, lateral division	4/301	0.0141642	0.0587273	4.56078	19.4154	NEUROD1;SMAD2;MAX;HNF4G
																JcPL part of the periaqueductal gray	3/301	0.0267461	0.0777865	4.94773	17.9176	TCF7L2;OTX2;SPDEF										Parabrachial nucleus, lateral division, ventral lateral part	4/301	0.0141642	0.0587273	4.56078	19.4154	NEUROD1;SMAD2;MAX;ESR1
																Koelliker-Fuse nucleus	3/301	0.0267461	0.0777865	4.94773	17.9176	NEUROD1;FLI1;SPDEF										Paragigantocellular reticular nucleus	4/301	0.0141642	0.0587273	4.56078	19.4154	AR;MYC;FOXA3;NFE2L2
																Koelliker-Fuse subnucleus	3/301	0.0267461	0.0777865	4.94773	17.9176	GATA3;FLI1;SPDEF										Paramedian lobule, granular layer	4/301	0.0141642	0.0587273	4.56078	19.4154	NEUROD1;NFE2;MAX;FOXA2
																Lateral dorsal nucleus of thalamus	3/301	0.0267461	0.0777865	4.94773	17.9176	TCF7L2;LEF1;OTX2										Parasubiculum, layer 3	4/301	0.0141642	0.0587273	4.56078	19.4154	KLF5;TCF4;GATA3;POU5F1
																Lateral habenula	3/301	0.0267461	0.0777865	4.94773	17.9176	TCF7L2;LEF1;OTX2										Paraventricular hypothalamic nucleus, magnocellular division, medial magnocellular part	4/301	0.0141642	0.0587273	4.56078	19.4154	REST;HNF4G;ERG;ESR1
																Lateral reticular nucleus	3/301	0.0267461	0.0777865	4.94773	17.9176	AR;MYC;NFE2L2										Paraventricular nucleus of the thalamus	4/301	0.0141642	0.0587273	4.56078	19.4154	SOX2;TCF7L2;REST;LEF1
																Lateral septal nucleus, ventral part	3/301	0.0267461	0.0777865	4.94773	17.9176	SOX2;EOMES;AR										Pedunculopontine nucleus	4/301	0.0141642	0.0587273	4.56078	19.4154	FOXA1;HNF1A;GATA3;SPDEF
																Medial geniculate complex	3/301	0.0267461	0.0777865	4.94773	17.9176	TCF7L2;LEF1;GATA3										Posterodorsal preoptic nucleus	4/301	0.0141642	0.0587273	4.56078	19.4154	AR;WT1;ERG;ESR1
																Medial geniculate complex, dorsal part	3/301	0.0267461	0.0777865	4.94773	17.9176	TCF7L2;LEF1;GATA3										Posterolateral visual area	4/301	0.0141642	0.0587273	4.56078	19.4154	KLF5;BHLHE40;NR3C1;POU5F1
																Medial geniculate complex, ventral part	3/301	0.0267461	0.0777865	4.94773	17.9176	TCF7L2;LEF1;GATA3										Posterolateral visual area, layer 5	4/301	0.0141642	0.0587273	4.56078	19.4154	KLF5;BHLHE40;NR3C1;POU5F1
																Medial pretectal area	3/301	0.0267461	0.0777865	4.94773	17.9176	TCF7L2;OTX2;SPDEF										Posterolateral visual area, layer 6a	4/301	0.0141642	0.0587273	4.56078	19.4154	KLF5;GATA3;NR3C1;POU5F1
																Mediodorsal nucleus of thalamus	3/301	0.0267461	0.0777865	4.94773	17.9176	TCF7L2;LEF1;OTX2										Primary visual area, layer 4	4/301	0.0141642	0.0587273	4.56078	19.4154	KLF5;BHLHE40;ERF;KLF4
																Mediodorsal nucleus of the thalamus, central part	3/301	0.0267461	0.0777865	4.94773	17.9176	TCF7L2;LEF1;OTX2										Principal sensory nucleus of the trigeminal	4/301	0.0141642	0.0587273	4.56078	19.4154	GATA3;PHOX2B;SPDEF;NR2F6
																Mediodorsal nucleus of the thalamus, lateral part	3/301	0.0267461	0.0777865	4.94773	17.9176	TCF7L2;LEF1;OTX2										Simple lobule, granular layer	4/301	0.0141642	0.0587273	4.56078	19.4154	NEUROD1;NFE2;MAX;FOXA2
																Midbrain, behavioral state related	3/301	0.0267461	0.0777865	4.94773	17.9176	FOXA1;GATA3;NR2F6										Simple lobule, molecular layer	4/301	0.0141642	0.0587273	4.56078	19.4154	NEUROD1;MAX;POU5F1;FOXA2
																Midbrain, sensory related	3/301	0.0267461	0.0777865	4.94773	17.9176	TCF7L2;SOX17;OTX2										Subiculum, dorsal part, pyramidal layer	4/301	0.0141642	0.0587273	4.56078	19.4154	BHLHE40;TCF4;NR3C1;ETV5
																Midline group of the dorsal thalamus	3/301	0.0267461	0.0777865	4.94773	17.9176	SOX2;TCF7L2;LEF1										Submedial nucleus of the thalamus	4/301	0.0141642	0.0587273	4.56078	19.4154	TCF7L2;ELF1;LEF1;ERG
																Mus musculus	3/301	0.0267461	0.0777865	4.94773	17.9176	NEUROD1;EOMES;ETV5										Subparafascicular nucleus, magnocellular part	4/301	0.0141642	0.0587273	4.56078	19.4154	TCF7L2;LEF1;EBF3;ERG
																Nucleus ambiguus, dorsal division	3/301	0.0267461	0.0777865	4.94773	17.9176	AR;MYC;NFE2L2										Superior colliculus, motor related, deep gray layer	4/301	0.0141642	0.0587273	4.56078	19.4154	TCF7L2;LEF1;OTX2;GATA3
																Nucleus of reunions	3/301	0.0267461	0.0777865	4.94773	17.9176	SOX2;TCF7L2;LEF1										Superior colliculus, motor related, intermediate gray layer, sublayer b	4/301	0.0141642	0.0587273	4.56078	19.4154	TCF7L2;OTX2;GATA3;SPDEF
																Nucleus of the lateral lemniscus, ventral part	3/301	0.0267461	0.0777865	4.94773	17.9176	GATA4;GATA3;SPDEF										Superior colliculus, motor related, intermediate white layer	4/301	0.0141642	0.0587273	4.56078	19.4154	TCF7L2;LEF1;OTX2;GATA3
																Nucleus of the lateral olfactory tract, layer 3	3/301	0.0267461	0.0777865	4.94773	17.9176	NR2F1;GATA3;FLI1										Superior colliculus, sensory related	4/301	0.0141642	0.0587273	4.56078	19.4154	LEF1;HNF4G;OTX2;ERG
																Nucleus of the lateral olfactory tract, pyramidal layer	3/301	0.0267461	0.0777865	4.94773	17.9176	GATA3;FLI1;NR2F6										Superior colliculus, superficial gray layer	4/301	0.0141642	0.0587273	4.56078	19.4154	LEF1;HNF4G;OTX2;ERG
																Nucleus of the trapezoid body	3/301	0.0267461	0.0777865	4.94773	17.9176	AR;MYC;KLF1										Taenia tecta, dorsal part, layer 2	4/301	0.0141642	0.0587273	4.56078	19.4154	REST;SOX17;GATA1;FOSL2
																Nucleus x	3/301	0.0267461	0.0777865	4.94773	17.9176	OTX2;HNF1A;FOXA2										Thalamus, sensory-motor cortex related	4/301	0.0141642	0.0587273	4.56078	19.4154	TCF7L2;LEF1;NR2F1;GATA3
																Orbital area, lateral part	3/301	0.0267461	0.0777865	4.94773	17.9176	EOMES;SOX17;FLI1										Uvula (IX)	4/301	0.0141642	0.0587273	4.56078	19.4154	EOMES;NEUROD1;WT1;OTX2
																Orbital area, lateral part, layer 1	3/301	0.0267461	0.0777865	4.94773	17.9176	EOMES;SOX17;HNF1A										Uvula (IX), granular layer	4/301	0.0141642	0.0587273	4.56078	19.4154	EOMES;NEUROD1;WT1;OTX2
																Orbital area, lateral part, layer 2/3	3/301	0.0267461	0.0777865	4.94773	17.9176	EOMES;SOX17;FLI1										Uvula (IX), molecular layer	4/301	0.0141642	0.0587273	4.56078	19.4154	EOMES;NEUROD1;WT1;OTX2
																Orbital area, ventrolateral part	3/301	0.0267461	0.0777865	4.94773	17.9176	EOMES;SOX17;HNF1A										Ventral group of the dorsal thalamus	4/301	0.0141642	0.0587273	4.56078	19.4154	TCF7L2;LEF1;NR2F1;NR2F6
																Orbital area, ventrolateral part, layer 1	3/301	0.0267461	0.0777865	4.94773	17.9176	EOMES;SOX17;HNF1A										Ventral posterior complex of the thalamus	4/301	0.0141642	0.0587273	4.56078	19.4154	TCF7L2;LEF1;NR2F1;NR2F6
																Orbital area, ventrolateral part, layer 2/3	3/301	0.0267461	0.0777865	4.94773	17.9176	EOMES;SOX17;HNF1A										Ventral posterolateral nucleus of the thalamus	4/301	0.0141642	0.0587273	4.56078	19.4154	TCF7L2;LEF1;NR2F1;NR2F6
																Parabrachial nucleus	3/301	0.0267461	0.0777865	4.94773	17.9176	NEUROD1;GATA3;SPDEF										Visceral area, layer 6a	4/301	0.0141642	0.0587273	4.56078	19.4154	REST;HNF1A;FLI1;RUNX1
																Parabrachial nucleus, lateral division, external lateral part	3/301	0.0267461	0.0777865	4.94773	17.9176	NEUROD1;GATA3;SPDEF										Zona incerta	4/301	0.0141642	0.0587273	4.56078	19.4154	TCF7L2;LEF1;GATA3;SPDEF
																Parabrachial nucleus, lateral division, superior lateral part	3/301	0.0267461	0.0777865	4.94773	17.9176	NEUROD1;MAX;GATA3										amygdalohippocampal area	4/301	0.0141642	0.0587273	4.56078	19.4154	NR2F1;HNF1B;ESR1;FOXO1
																Parabrachial nucleus, lateral division, ventral lateral part	3/301	0.0267461	0.0777865	4.94773	17.9176	NEUROD1;MAX;ESR1										anterior nuclei	4/301	0.0141642	0.0587273	4.56078	19.4154	SMAD2;TCF7L2;LEF1;FOXA2
																Paragigantocellular reticular nucleus	3/301	0.0267461	0.0777865	4.94773	17.9176	AR;MYC;NFE2L2										anterior olfactory area, ventral part	4/301	0.0141642	0.0587273	4.56078	19.4154	EOMES;HNF1A;GATA2;FOSL2
																Parasolitary nucleus	3/301	0.0267461	0.0777865	4.94773	17.9176	AR;OTX2;KLF1										anterior part of Int	4/301	0.0141642	0.0587273	4.56078	19.4154	NEUROD1;ELF4;HNF1A;FOXA2
																Parasubiculum, layer 3	3/301	0.0267461	0.0777865	4.94773	17.9176	TCF4;GATA3;POU5F1										anterior pretectal nucleus, dorsal core part	4/301	0.0141642	0.0587273	4.56078	19.4154	TCF7L2;LEF1;NR3C1;POU5F1
																Paraventricular hypothalamic nucleus, descending division	3/301	0.0267461	0.0777865	4.94773	17.9176	ERG;KLF4;ESR1										anteroventral periventricular preoptic nucleus	4/301	0.0141642	0.0587273	4.56078	19.4154	AR;KLF4;ESR1;NFE2L2
																Paraventricular hypothalamic nucleus, descending division, lateral parvicellular part	3/301	0.0267461	0.0777865	4.94773	17.9176	ERG;KLF4;ESR1										basal reticular formation of p1	4/301	0.0141642	0.0587273	4.56078	19.4154	FOXA1;TCF7L2;EBF3;FOXA2
																Paraventricular nucleus of the thalamus	3/301	0.0267461	0.0777865	4.94773	17.9176	SOX2;TCF7L2;LEF1										central lateral nucleus	4/301	0.0141642	0.0587273	4.56078	19.4154	TCF7L2;LEF1;OTX2;NR3C1
																PcPL part of the periaqueductal gray	3/301	0.0267461	0.0777865	4.94773	17.9176	TCF7L2;OTX2;SPDEF										central part of MPO	4/301	0.0141642	0.0587273	4.56078	19.4154	AR;ERG;KLF4;ESR1
																Posterior complex of the thalamus	3/301	0.0267461	0.0777865	4.94773	17.9176	TCF7L2;LEF1;NR3C1										cerebellar nuclei of CbH	4/301	0.0141642	0.0587273	4.56078	19.4154	NEUROD1;ELF4;HNF1A;FOXA2
																Posterior pretectal nucleus	3/301	0.0267461	0.0777865	4.94773	17.9176	TCF7L2;PBX2;OTX2										deep gray layer of SC	4/301	0.0141642	0.0587273	4.56078	19.4154	TCF7L2;LEF1;EBF3;OTX2
																Posterodorsal preoptic nucleus	3/301	0.0267461	0.0777865	4.94773	17.9176	AR;ERG;ESR1										dorsal cortical nucleus of inferior colliculus	4/301	0.0141642	0.0587273	4.56078	19.4154	TCF7L2;OTX2;HNF1A;ERG
																Posterolateral visual area	3/301	0.0267461	0.0777865	4.94773	17.9176	BHLHE40;NR3C1;POU5F1										dorsal paracommissural tectal nucleus, m1 part	4/301	0.0141642	0.0587273	4.56078	19.4154	TCF7L2;LEF1;OTX2;ERG
																Posterolateral visual area, layer 5	3/301	0.0267461	0.0777865	4.94773	17.9176	BHLHE40;NR3C1;POU5F1										dorsal part of alar p3	4/301	0.0141642	0.0587273	4.56078	19.4154	SOX2;EOMES;TCF7L2;LEF1
																Posterolateral visual area, layer 6a	3/301	0.0267461	0.0777865	4.94773	17.9176	GATA3;NR3C1;POU5F1										dorsofrontal pretectal nucleus	4/301	0.0141642	0.0587273	4.56078	19.4154	TCF7L2;PRDM1;NR3C1;POU5F1
																Postpiriform transition area, layers 1	3/301	0.0267461	0.0777865	4.94773	17.9176	VDR;NR2F1;ERF										dorsolateral part of m1A	4/301	0.0141642	0.0587273	4.56078	19.4154	TCF7L2;SOX17;LEF1;OTX2
																Precommissural nucleus	3/301	0.0267461	0.0777865	4.94773	17.9176	TCF7L2;ERG;SPDEF										dorsomedial preoptic area, superficial part	4/301	0.0141642	0.0587273	4.56078	19.4154	AR;KLF4;SPDEF;NFE2L2
																Presubiculum, layer 2	3/301	0.0267461	0.0777865	4.94773	17.9176	TCF4;GATA3;POU5F1										external part of AOD	4/301	0.0141642	0.0587273	4.56078	19.4154	PRDM1;HNF1A;GATA1;FOXA3
																Primary visual area, layer 4	3/301	0.0267461	0.0777865	4.94773	17.9176	BHLHE40;ERF;KLF4										interanterodorsal nucleus	4/301	0.0141642	0.0587273	4.56078	19.4154	SMAD2;TCF7L2;REST;LEF1
																Primary visual area, layer 5	3/301	0.0267461	0.0777865	4.94773	17.9176	BHLHE40;ERF;KLF4										intercalated amygdaloid nuclei	4/301	0.0141642	0.0587273	4.56078	19.4154	AR;NR2F1;HNF1B;ESR1
																Principal sensory nucleus of the trigeminal	3/301	0.0267461	0.0777865	4.94773	17.9176	GATA3;SPDEF;NR2F6										intermediate (interpositus) cerebellar nucleus	4/301	0.0141642	0.0587273	4.56078	19.4154	NEUROD1;ELF4;HNF1A;FOXA2
																Red nucleus	3/301	0.0267461	0.0777865	4.94773	17.9176	FOXA1;KLF1;FOXA2										intermediate part of r9B	4/301	0.0141642	0.0587273	4.56078	19.4154	ELF4;MYC;KLF1;NFE2L2
																Reticular nucleus of the thalamus	3/301	0.0267461	0.0777865	4.94773	17.9176	TCF7L2;LEF1;NR2F1										intermediate stratum of AOB	4/301	0.0141642	0.0587273	4.56078	19.4154	EOMES;PRDM1;HNF1A;GATA1
																Retrohippocampal region	3/301	0.0267461	0.0777865	4.94773	17.9176	TCF4;GATA3;NR2F6										intermediate stratum of CbH	4/301	0.0141642	0.0587273	4.56078	19.4154	NEUROD1;ELF4;HNF1A;FOXA2
																Retrosplenial area, dorsal part	3/301	0.0267461	0.0777865	4.94773	17.9176	BHLHE40;HNF1A;ERG										intermediate stratum of PThE	4/301	0.0141642	0.0587273	4.56078	19.4154	SOX2;EOMES;TCF7L2;LEF1
																Retrosplenial area, dorsal part, layer 2/3	3/301	0.0267461	0.0777865	4.94773	17.9176	BHLHE40;HNF1A;ERG										intermediate stratum of PcPD	4/301	0.0141642	0.0587273	4.56078	19.4154	TCF7L2;PRDM1;NR3C1;POU5F1
																Retrosplenial area, dorsal part, layer 5	3/301	0.0267461	0.0777865	4.94773	17.9176	BHLHE40;HNF1A;ERG										intermediate stratum of PcPL	4/301	0.0141642	0.0587273	4.56078	19.4154	TCF7L2;LEF1;NR3C1;POU5F1
																Retrosplenial area, lateral agranular part, layer 6a	3/301	0.0267461	0.0777865	4.94773	17.9176	SOX17;BHLHE40;MEF2D										intermediate stratum of p2B	4/301	0.0141642	0.0587273	4.56078	19.4154	FOXA1;TCF7L2;LEF1;EBF3
																Retrosplenial area, lateral agranular part, layer 6b	3/301	0.0267461	0.0777865	4.94773	17.9176	SOX17;BHLHE40;MEF2D										intermediate stratum of p3B	4/301	0.0141642	0.0587273	4.56078	19.4154	FOXA1;TCF7L2;LEF1;EBF3
																Subiculum, dorsal part	3/301	0.0267461	0.0777865	4.94773	17.9176	BHLHE40;TCF4;NR3C1										intermediate stratum of r10BI	4/301	0.0141642	0.0587273	4.56078	19.4154	ELF4;MYC;MYB;NFE2L2
																Submedial nucleus of the thalamus	3/301	0.0267461	0.0777865	4.94773	17.9176	TCF7L2;LEF1;ERG										intermediate stratum of r10BL	4/301	0.0141642	0.0587273	4.56078	19.4154	ELF4;MYC;MYB;NFE2L2
																Subparafascicular area	3/301	0.0267461	0.0777865	4.94773	17.9176	SOX2;TCF7L2;EBF3										intermediate stratum of r10Tr	4/301	0.0141642	0.0587273	4.56078	19.4154	MYC;RARA;HNF1B;KLF1
																Subparafascicular nucleus	3/301	0.0267461	0.0777865	4.94773	17.9176	TCF7L2;LEF1;GATA3										intermediate stratum of r8BI	4/301	0.0141642	0.0587273	4.56078	19.4154	ELF4;MYC;KLF1;NFE2L2
																Subparaventricular zone	3/301	0.0267461	0.0777865	4.94773	17.9176	SOX2;KLF4;ESR1										intermediate stratum of r8BL	4/301	0.0141642	0.0587273	4.56078	19.4154	MYC;MYB;KLF1;NFE2L2
																Superior central nucleus raphe	3/301	0.0267461	0.0777865	4.94773	17.9176	RARA;GATA3;RUNX1										intermediate stratum of r9BI	4/301	0.0141642	0.0587273	4.56078	19.4154	ELF4;MYC;KLF1;NFE2L2
																Superior colliculus, motor related, deep white layer	3/301	0.0267461	0.0777865	4.94773	17.9176	TCF7L2;LEF1;OTX2										intermediate stratum of r9Lim	4/301	0.0141642	0.0587273	4.56078	19.4154	MYC;MYB;KLF1;NFE2L2
																Superior colliculus, motor related, intermediate gray layer, sublayer a	3/301	0.0267461	0.0777865	4.94773	17.9176	TCF7L2;OTX2;SPDEF										intermediate tier of thalamus	4/301	0.0141642	0.0587273	4.56078	19.4154	TCF7L2;LEF1;NR3C1;SPDEF
																Superior colliculus, motor related, intermediate gray layer, sublayer c	3/301	0.0267461	0.0777865	4.94773	17.9176	TCF7L2;OTX2;SPDEF										intralaminar nuclei	4/301	0.0141642	0.0587273	4.56078	19.4154	TCF7L2;LEF1;OTX2;NR3C1
																Superior colliculus, sensory related	3/301	0.0267461	0.0777865	4.94773	17.9176	LEF1;OTX2;ERG										lateral SC part of the periaqueductal gray	4/301	0.0141642	0.0587273	4.56078	19.4154	TCF7L2;EBF3;OTX2;HOXB13
																Superior colliculus, superficial gray layer	3/301	0.0267461	0.0777865	4.94773	17.9176	LEF1;OTX2;ERG										lateral part of r10B	4/301	0.0141642	0.0587273	4.56078	19.4154	ELF4;MYC;MYB;NFE2L2
																Supramammillary nucleus, lateral part	3/301	0.0267461	0.0777865	4.94773	17.9176	FOXA1;EBF3;ERG										lateral subhabenular nucleus	4/301	0.0141642	0.0587273	4.56078	19.4154	TCF7L2;ELF1;REST;LEF1
																Triangular nucleus of septum	3/301	0.0267461	0.0777865	4.94773	17.9176	SOX2;EOMES;EBF3										layer 1 of FCx	4/301	0.0141642	0.0587273	4.56078	19.4154	EOMES;PRDM1;GATA1;FOXA3
																Uvula (IX)	3/301	0.0267461	0.0777865	4.94773	17.9176	NEUROD1;EOMES;OTX2										layer 2 of AOV cortex	4/301	0.0141642	0.0587273	4.56078	19.4154	EOMES;HNF1A;GATA2;FOSL2
																Uvula (IX), granular layer	3/301	0.0267461	0.0777865	4.94773	17.9176	NEUROD1;EOMES;OTX2										layer 2 of PaS	4/301	0.0141642	0.0587273	4.56078	19.4154	ELF1;KLF5;TCF4;POU5F1
																Uvula (IX), molecular layer	3/301	0.0267461	0.0777865	4.94773	17.9176	NEUROD1;EOMES;OTX2										layer 2 of PrS	4/301	0.0141642	0.0587273	4.56078	19.4154	NFE2;WT1;TCF4;POU5F1
																Ventral anterior-lateral complex of the thalamus	3/301	0.0267461	0.0777865	4.94773	17.9176	TCF7L2;LEF1;NR2F1										layer 3 of AOD cortex	4/301	0.0141642	0.0587273	4.56078	19.4154	HNF4G;HNF1A;GATA1;FOXA3
																Ventral posterolateral nucleus of the thalamus, parvicellular part	3/301	0.0267461	0.0777865	4.94773	17.9176	TCF7L2;LEF1;HNF1A										layer 3 of AOV cortex	4/301	0.0141642	0.0587273	4.56078	19.4154	NR2F1;HNF1A;GATA2;FOSL2
																Ventral posteromedial nucleus of the thalamus	3/301	0.0267461	0.0777865	4.94773	17.9176	TCF7L2;LEF1;NR2F1										layer 3 of PaS	4/301	0.0141642	0.0587273	4.56078	19.4154	KLF5;TCF4;NR3C1;POU5F1
																Ventral posteromedial nucleus of the thalamus, parvicellular part	3/301	0.0267461	0.0777865	4.94773	17.9176	TCF7L2;LEF1;HNF1A										layer 3 of RSC	4/301	0.0141642	0.0587273	4.56078	19.4154	ELF1;ERF;NR2F1;TCF4
																Ventral premammillary nucleus	3/301	0.0267461	0.0777865	4.94773	17.9176	AR;ERG;ESR1										layer 5 of PaS	4/301	0.0141642	0.0587273	4.56078	19.4154	KLF5;TCF4;NR3C1;ETV5
																Ventromedial hypothalamic nucleus, central part	3/301	0.0267461	0.0777865	4.94773	17.9176	AR;ERG;ESR1										layer 6 of OCx	4/301	0.0141642	0.0587273	4.56078	19.4154	BHLHE40;ERF;NR3C1;MEF2D
																Visceral area	3/301	0.0267461	0.0777865	4.94773	17.9176	HNF1A;FLI1;RUNX1										layer 6 of PrS	4/301	0.0141642	0.0587273	4.56078	19.4154	BHLHE40;HNF4G;TCF4;NR3C1
																Visceral area, layer 6a	3/301	0.0267461	0.0777865	4.94773	17.9176	HNF1A;FLI1;RUNX1										layer 6 of RSC	4/301	0.0141642	0.0587273	4.56078	19.4154	ERF;NR2F1;NR3C1;ETV5
																Visceral area, layer 6b	3/301	0.0267461	0.0777865	4.94773	17.9176	PBX2;FLI1;RUNX1										layer 6a of PrS	4/301	0.0141642	0.0587273	4.56078	19.4154	BHLHE40;HNF4G;TCF4;NR3C1
																alar plate of m1	3/301	0.0267461	0.0777865	4.94773	17.9176	TCF7L2;LEF1;OTX2										liminal part of the r7 alar plate	4/301	0.0141642	0.0587273	4.56078	19.4154	CDX2;MYC;MYB;NFE2L2
																alar plate of p3 (alar prethalamus)	3/301	0.0267461	0.0777865	4.94773	17.9176	TCF7L2;LEF1;NR2F1										lower basal perifornical nucleus	4/301	0.0141642	0.0587273	4.56078	19.4154	SMAD2;AR;NFIL3;FOSL2
																amygdalohippocampal area	3/301	0.0267461	0.0777865	4.94773	17.9176	NR2F1;HNF1B;ESR1										m1AD (DM) part of periaqueductal gray	4/301	0.0141642	0.0587273	4.56078	19.4154	TCF7L2;LEF1;HNF4G;HOXB13
																anterior nuclei	3/301	0.0267461	0.0777865	4.94773	17.9176	TCF7L2;LEF1;FOXA2										mantle zone of AOV	4/301	0.0141642	0.0587273	4.56078	19.4154	EOMES;HNF1A;GATA2;FOSL2
																anterior olfactory area, ventral part	3/301	0.0267461	0.0777865	4.94773	17.9176	EOMES;HNF1A;GATA2										mantle zone of IC	4/301	0.0141642	0.0587273	4.56078	19.4154	NEUROD1;TCF7L2;SOX17;OTX2
																anterior paraventricular nucleus of thalamus	3/301	0.0267461	0.0777865	4.94773	17.9176	SOX2;TCF7L2;LEF1										mantle zone of ITTh	4/301	0.0141642	0.0587273	4.56078	19.4154	TCF7L2;LEF1;NR3C1;SPDEF
																anterior part of Int	3/301	0.0267461	0.0777865	4.94773	17.9176	NEUROD1;HNF1A;FOXA2										mantle zone of PHyB-P	4/301	0.0141642	0.0587273	4.56078	19.4154	FOXA1;SMAD2;NFIL3;EBF3
																anteroventral nucleus	3/301	0.0267461	0.0777865	4.94773	17.9176	TCF7L2;LEF1;FOXA2										mantle zone of PThE	4/301	0.0141642	0.0587273	4.56078	19.4154	SOX2;EOMES;TCF7L2;LEF1
																basal plate of p1	3/301	0.0267461	0.0777865	4.94773	17.9176	FOXA1;EBF3;FOXA2										mantle zone of PaS	4/301	0.0141642	0.0587273	4.56078	19.4154	ELF1;KLF5;TCF4;POU5F1
																basal plate of p2	3/301	0.0267461	0.0777865	4.94773	17.9176	FOXA1;TCF7L2;EBF3										mantle zone of StrSe	4/301	0.0141642	0.0587273	4.56078	19.4154	SOX2;EOMES;REST;EBF3
																basointermediate isthmic reticular formation	3/301	0.0267461	0.0777865	4.94773	17.9176	FOXA1;KLF1;FOXA2										mantle zone of p2B	4/301	0.0141642	0.0587273	4.56078	19.4154	FOXA1;TCF7L2;LEF1;EBF3
																basomedial amygdaloid nucleus, anterior part	3/301	0.0267461	0.0777865	4.94773	17.9176	NR2F1;HNF1B;ESR1										mantle zone of r10BL	4/301	0.0141642	0.0587273	4.56078	19.4154	ELF4;MYC;MYB;NFE2L2
																basomedial amygdaloid nucleus, posterior part	3/301	0.0267461	0.0777865	4.94773	17.9176	NR2F1;HNF1B;ESR1										mantle zone of r10BM	4/301	0.0141642	0.0587273	4.56078	19.4154	ELF4;HOXB13;RUNX1;NFE2L2
																bed nucleus of the stria terminalis, mediocentral division	3/301	0.0267461	0.0777865	4.94773	17.9176	AR;LEF1;ESR1										mantle zone of r2Co	4/301	0.0141642	0.0587273	4.56078	19.4154	EOMES;NEUROD1;NFE2;OTX2
																bed nucleus of the stria terminalis, medioseptal division	3/301	0.0267461	0.0777865	4.94773	17.9176	SOX2;AR;ERG										mantle zone of r5Ve	4/301	0.0141642	0.0587273	4.56078	19.4154	HNF1A;GATA1;PHOX2B;FOXA3
																central layers of TG	3/301	0.0267461	0.0777865	4.94773	17.9176	TCF7L2;LEF1;OTX2										mantle zone of r7Lim	4/301	0.0141642	0.0587273	4.56078	19.4154	CDX2;MYC;MYB;NFE2L2
																central nucleus of the inferior colliculus	3/301	0.0267461	0.0777865	4.94773	17.9176	TCF7L2;SOX17;OTX2										mantle zone of r7Ve	4/301	0.0141642	0.0587273	4.56078	19.4154	MITF;OTX2;PHOX2B;KLF1
																central part of MD	3/301	0.0267461	0.0777865	4.94773	17.9176	TCF7L2;LEF1;FOXA2										mantle zone of r8Tr	4/301	0.0141642	0.0587273	4.56078	19.4154	CDX2;MYC;PHOX2B;NFE2L2
																cerebellar nuclei of CbH	3/301	0.0267461	0.0777865	4.94773	17.9176	NEUROD1;HNF1A;FOXA2										mantle zone of r8Ve	4/301	0.0141642	0.0587273	4.56078	19.4154	EBF3;OTX2;PHOX2B;KLF1
																cerebellar vermis	3/301	0.0267461	0.0777865	4.94773	17.9176	NEUROD1;MAX;FOXA2										mantle zone of r9BI	4/301	0.0141642	0.0587273	4.56078	19.4154	ELF4;MYC;KLF1;NFE2L2
																collicular (rostral) midbrain tectum	3/301	0.0267461	0.0777865	4.94773	17.9176	TCF7L2;LEF1;OTX2										mantle zone of r9BM	4/301	0.0141642	0.0587273	4.56078	19.4154	ELF4;WT1;RUNX1;NFE2L2
																commissural pretectal domain	3/301	0.0267461	0.0777865	4.94773	17.9176	TCF7L2;OTX2;SPDEF										medial (magnocellular) part of MD	4/301	0.0141642	0.0587273	4.56078	19.4154	TCF7L2;ELF1;REST;LEF1
																deep white layer of SC	3/301	0.0267461	0.0777865	4.94773	17.9176	TCF7L2;LEF1;OTX2										medial part of r10B	4/301	0.0141642	0.0587273	4.56078	19.4154	ELF4;HOXB13;RUNX1;NFE2L2
																dorsal juxtacommissural pretectal nucleus	3/301	0.0267461	0.0777865	4.94773	17.9176	TCF7L2;OTX2;SPDEF										medial part of r9B	4/301	0.0141642	0.0587273	4.56078	19.4154	ELF4;WT1;RUNX1;NFE2L2
																dorsal part of m1A	3/301	0.0267461	0.0777865	4.94773	17.9176	TCF7L2;LEF1;OTX2										medial pretectal nucleus	4/301	0.0141642	0.0587273	4.56078	19.4154	TCF7L2;REST;OTX2;SPDEF
																dorsal part of m2A	3/301	0.0267461	0.0777865	4.94773	17.9176	TCF7L2;LEF1;HOXB13										medial subhabenular nucleus	4/301	0.0141642	0.0587273	4.56078	19.4154	TCF7L2;REST;MITF;SPDEF
																dorsal preisthmic part of periaqueductal gray	3/301	0.0267461	0.0777865	4.94773	17.9176	TCF7L2;LEF1;HOXB13										medial superior olive	4/301	0.0141642	0.0587273	4.56078	19.4154	VDR;MYC;MITF;FOXA3
																dorsofrontal pretectal nucleus	3/301	0.0267461	0.0777865	4.94773	17.9176	TCF7L2;NR3C1;POU5F1										medial trapezoid nucleus	4/301	0.0141642	0.0587273	4.56078	19.4154	ELF4;WT1;POU5F1;KLF1
																dorsolateral SC part of the periaqueductal gray	3/301	0.0267461	0.0777865	4.94773	17.9176	TCF7L2;LEF1;OTX2										mesomere 2 (preisthmus or caudal midbrain)	4/301	0.0141642	0.0587273	4.56078	19.4154	FOXA1;TCF7L2;EBF3;GATA4
																dorsolateral TG part of the periaqueductal gray	3/301	0.0267461	0.0777865	4.94773	17.9176	TCF7L2;LEF1;OTX2										neural plate	4/301	0.0141642	0.0587273	4.56078	19.4154	EOMES;NEUROD1;EGR3;ETV5
																dorsolateral isthmic part of the dorsal raphe nucleus	3/301	0.0267461	0.0777865	4.94773	17.9176	FOXA1;GATA3;ESR1										nucleus of the stria medullaris (prethalamic)	4/301	0.0141642	0.0587273	4.56078	19.4154	SOX2;EOMES;TCF7L2;LEF1
																dorsolateral part of Lat	3/301	0.0267461	0.0777865	4.94773	17.9176	NEUROD1;NFE2;MAX										p2 portion of the substantia nigra pars reticulata	4/301	0.0141642	0.0587273	4.56078	19.4154	FOXA1;SMAD2;NFIL3;HNF4G
																dorsolateral part of m2A	3/301	0.0267461	0.0777865	4.94773	17.9176	NEUROD1;TCF7L2;GATA4										p3 portion of the substantia nigra pars compacta	4/301	0.0141642	0.0587273	4.56078	19.4154	FOXA1;SMAD2;NFIL3;EBF3
																dorsolateral preisthmic part of periaqueductal gray	3/301	0.0267461	0.0777865	4.94773	17.9176	TCF7L2;EBF3;ESR1										parastrial preoptic nucleus	4/301	0.0141642	0.0587273	4.56078	19.4154	AR;PRDM1;ERG;ESR1
																dorsomedial preoptic area, intermediate part	3/301	0.0267461	0.0777865	4.94773	17.9176	AR;ERG;ESR1										parasubthalamic nucleus (migrated)	4/301	0.0141642	0.0587273	4.56078	19.4154	SMAD2;NFIL3;HOXB13;FOSL2
																ethmoid nucleus	3/301	0.0267461	0.0777865	4.94773	17.9176	TCF7L2;LEF1;NR3C1										perimammillary part of PHyB	4/301	0.0141642	0.0587273	4.56078	19.4154	FOXA1;SMAD2;NFIL3;EBF3
																external cortical nucleus of inferior colliculus	3/301	0.0267461	0.0777865	4.94773	17.9176	NEUROD1;TCF7L2;SOX17										periventricular part of StrSe	4/301	0.0141642	0.0587273	4.56078	19.4154	SOX2;EOMES;AR;EBF3
																intercalate nucleus	3/301	0.0267461	0.0777865	4.94773	17.9176	TCF7L2;LEF1;NR2F1										periventricular stratum of DTTh	4/301	0.0141642	0.0587273	4.56078	19.4154	SOX2;TCF7L2;REST;LEF1
																intermediate (interpositus) cerebellar nucleus	3/301	0.0267461	0.0777865	4.94773	17.9176	NEUROD1;HNF1A;FOXA2										periventricular stratum of m1AD	4/301	0.0141642	0.0587273	4.56078	19.4154	TCF7L2;LEF1;HNF4G;HOXB13
																intermediate part of isB	3/301	0.0267461	0.0777865	4.94773	17.9176	FOXA1;KLF1;FOXA2										periventricular stratum of p3ZL	4/301	0.0141642	0.0587273	4.56078	19.4154	SOX2;TCF7L2;REST;LEF1
																intermediate part of r1B	3/301	0.0267461	0.0777865	4.94773	17.9176	FOXA1;SPDEF;KLF1										periventricular stratum of r10BM	4/301	0.0141642	0.0587273	4.56078	19.4154	ELF4;STAT3;RUNX1;NFE2L2
																intermediate part of r9B	3/301	0.0267461	0.0777865	4.94773	17.9176	MYC;KLF1;NFE2L2										periventricular stratum of r5Ve	4/301	0.0141642	0.0587273	4.56078	19.4154	MITF;GATA1;FOXA3;KLF1
																intermediate periretromammillary nucleus	3/301	0.0267461	0.0777865	4.94773	17.9176	FOXA1;EBF3;ERG										periventricular stratum of r6Ve	4/301	0.0141642	0.0587273	4.56078	19.4154	MITF;GATA1;FOXA3;KLF1
																intermediate stratum of 5BL	3/301	0.0267461	0.0777865	4.94773	17.9176	MYC;HOXB13;KLF1										periventricular stratum of r7Ve	4/301	0.0141642	0.0587273	4.56078	19.4154	ELF4;MITF;OTX2;KLF1
																intermediate stratum of CbH	3/301	0.0267461	0.0777865	4.94773	17.9176	NEUROD1;HNF1A;FOXA2										periventricular stratum of r8BM	4/301	0.0141642	0.0587273	4.56078	19.4154	REST;ELF4;WT1;RUNX1
																intermediate stratum of DgSe	3/301	0.0267461	0.0777865	4.94773	17.9176	SOX2;MNT;ERG										periventricular stratum of r8Tr	4/301	0.0141642	0.0587273	4.56078	19.4154	ELF4;WT1;MITF;KLF1
																intermediate stratum of Hb	3/301	0.0267461	0.0777865	4.94773	17.9176	TCF7L2;LEF1;OTX2										periventricular stratum of r9Tr	4/301	0.0141642	0.0587273	4.56078	19.4154	ELF4;WT1;PHOX2B;KLF1
																intermediate stratum of IC	3/301	0.0267461	0.0777865	4.94773	17.9176	TCF7L2;SOX17;OTX2										pontomedullary hindbrain	4/301	0.0141642	0.0587273	4.56078	19.4154	ELF4;MYC;FOXA3;KLF1
																intermediate stratum of ITTh	3/301	0.0267461	0.0777865	4.94773	17.9176	TCF7L2;LEF1;NR3C1										posterior paraventricular nucleus	4/301	0.0141642	0.0587273	4.56078	19.4154	TCF7L2;REST;LEF1;SPDEF
																intermediate stratum of PHyB-P	3/301	0.0267461	0.0777865	4.94773	17.9176	FOXA1;EBF3;ERG										prepontine hindbrain	4/301	0.0141642	0.0587273	4.56078	19.4154	NEUROD1;MAX;POU5F1;FOXA2
																intermediate stratum of PcPD	3/301	0.0267461	0.0777865	4.94773	17.9176	TCF7L2;NR3C1;POU5F1										prethalamic eminence	4/301	0.0141642	0.0587273	4.56078	19.4154	SOX2;EOMES;TCF7L2;LEF1
																intermediate stratum of RtC	3/301	0.0267461	0.0777865	4.94773	17.9176	TCF7L2;LEF1;NR2F1										r10 alar plate	4/301	0.0141642	0.0587273	4.56078	19.4154	ELF4;MYB;PHOX2B;NFE2L2
																intermediate stratum of SC	3/301	0.0267461	0.0777865	4.94773	17.9176	TCF7L2;LEF1;OTX2										r10 basal plate	4/301	0.0141642	0.0587273	4.56078	19.4154	ELF4;MYC;RUNX1;NFE2L2
																intermediate stratum of TG	3/301	0.0267461	0.0777865	4.94773	17.9176	TCF7L2;LEF1;OTX2										r10 part of basolateral reticular formation	4/301	0.0141642	0.0587273	4.56078	19.4154	ELF4;MYC;MYB;NFE2L2
																intermediate stratum of isBI	3/301	0.0267461	0.0777865	4.94773	17.9176	FOXA1;KLF1;FOXA2										r10 part of dorsal parvicellular reticular formation	4/301	0.0141642	0.0587273	4.56078	19.4154	MYC;RARA;HNF1B;KLF1
																intermediate stratum of m1AD	3/301	0.0267461	0.0777865	4.94773	17.9176	TCF7L2;LEF1;OTX2										r10 part of spinal trigeminal nucleus, caudal part	4/301	0.0141642	0.0587273	4.56078	19.4154	NFE2;CDX2;EBF3;NFE2L2
																intermediate stratum of p1B	3/301	0.0267461	0.0777865	4.94773	17.9176	FOXA1;EBF3;FOXA2										r2 part of cochlear sensory column	4/301	0.0141642	0.0587273	4.56078	19.4154	EOMES;NEUROD1;NFE2;OTX2
																intermediate stratum of p2ZL	3/301	0.0267461	0.0777865	4.94773	17.9176	TCF7L2;LEF1;NR2F1										r3 part of lateral vestibular nucleus	4/301	0.0141642	0.0587273	4.56078	19.4154	OTX2;HNF1A;GATA1;PHOX2B
																intermediate stratum of p3ZL	3/301	0.0267461	0.0777865	4.94773	17.9176	TCF7L2;LEF1;NR2F1										r5 basal plate	4/301	0.0141642	0.0587273	4.56078	19.4154	ELF4;MYC;HOXB13;KLF1
																intermediate stratum of r10BI	3/301	0.0267461	0.0777865	4.94773	17.9176	MYC;MYB;NFE2L2										r5 part of basomedial reticular formation	4/301	0.0141642	0.0587273	4.56078	19.4154	ELF4;MYC;HOXB13;FOXA2
																intermediate stratum of r10BL	3/301	0.0267461	0.0777865	4.94773	17.9176	MYC;MYB;NFE2L2										r5 part of parvocellular medial vestibular nucleus	4/301	0.0141642	0.0587273	4.56078	19.4154	MITF;GATA1;FOXA3;KLF1
																intermediate stratum of r1BI	3/301	0.0267461	0.0777865	4.94773	17.9176	FOXA1;SPDEF;KLF1										r5 part of the vestibular column	4/301	0.0141642	0.0587273	4.56078	19.4154	HNF1A;GATA1;PHOX2B;FOXA3
																intermediate stratum of r8BI	3/301	0.0267461	0.0777865	4.94773	17.9176	MYC;KLF1;NFE2L2										r6 basal plate	4/301	0.0141642	0.0587273	4.56078	19.4154	ELF4;WT1;HOXB13;FOXA3
																intermediate stratum of r8Tr	3/301	0.0267461	0.0777865	4.94773	17.9176	MYC;KLF1;NFE2L2										r6 part of basomedial reticular formation	4/301	0.0141642	0.0587273	4.56078	19.4154	ELF4;HNF4G;HNF1A;RUNX1
																intermediate stratum of r9BI	3/301	0.0267461	0.0777865	4.94773	17.9176	MYC;KLF1;NFE2L2										r6 part of gigantocellular reticular area	4/301	0.0141642	0.0587273	4.56078	19.4154	ELF4;WT1;SOX13;HOXB13
																intermediate stratum of r9BL	3/301	0.0267461	0.0777865	4.94773	17.9176	MYC;KLF1;NFE2L2										r6 part of paragigantocellular nucleus	4/301	0.0141642	0.0587273	4.56078	19.4154	ELF4;WT1;MITF;FOXA3
																intermediate stratum of the VAP	3/301	0.0267461	0.0777865	4.94773	17.9176	NR2F1;HNF1B;ESR1										r6 part of parvocellular medial vestibular nucleus	4/301	0.0141642	0.0587273	4.56078	19.4154	MITF;GATA1;FOXA3;KLF1
																intermediate white layer of SC	3/301	0.0267461	0.0777865	4.94773	17.9176	TCF7L2;LEF1;OTX2										r6 part of rostral ventromedial reticular area	4/301	0.0141642	0.0587273	4.56078	19.4154	ELF4;WT1;MITF;FOXA3
																intermedioposterior nucleus	3/301	0.0267461	0.0777865	4.94773	17.9176	TCF7L2;LEF1;NR3C1										r7 part of nucleus prepositus	4/301	0.0141642	0.0587273	4.56078	19.4154	ELF4;WT1;OTX2;RUNX1
																interstitial nucleus of the zona limitans	3/301	0.0267461	0.0777865	4.94773	17.9176	TCF7L2;LEF1;NR2F1										r7 part of parvocellular medial vestibular nucleus	4/301	0.0141642	0.0587273	4.56078	19.4154	ELF4;MITF;OTX2;KLF1
																isthmus	3/301	0.0267461	0.0777865	4.94773	17.9176	NEUROD1;MAX;FOXA2										r7 part of spinal vestibular nucleus	4/301	0.0141642	0.0587273	4.56078	19.4154	HNF4G;OTX2;PHOX2B;KLF1
																isthmus proper	3/301	0.0267461	0.0777865	4.94773	17.9176	NEUROD1;GATA4;HNF1A										r7 part of the vestibular column	4/301	0.0141642	0.0587273	4.56078	19.4154	MITF;OTX2;PHOX2B;KLF1
																lateral (dentate) cerebellar nucleus	3/301	0.0267461	0.0777865	4.94773	17.9176	NEUROD1;NFE2;MAX										r8 (gustatory) part of solitary complex	4/301	0.0141642	0.0587273	4.56078	19.4154	ELF4;WT1;MITF;KLF1
																lateral (parvicellular) part of MD	3/301	0.0267461	0.0777865	4.94773	17.9176	TCF7L2;LEF1;OTX2										r8 part of basointermediate reticular formation	4/301	0.0141642	0.0587273	4.56078	19.4154	ELF4;MYC;KLF1;NFE2L2
																lateral IC periaqueductal gray	3/301	0.0267461	0.0777865	4.94773	17.9176	TCF7L2;EBF3;HOXB13										r8 part of basolateral reticular formation	4/301	0.0141642	0.0587273	4.56078	19.4154	MYC;MYB;KLF1;NFE2L2
																lateral part of CoP	3/301	0.0267461	0.0777865	4.94773	17.9176	TCF7L2;OTX2;SPDEF										r8 part of nucleus of Roller	4/301	0.0141642	0.0587273	4.56078	19.4154	ELF4;WT1;RUNX1;NFE2L2
																lateral part of alar m1	3/301	0.0267461	0.0777865	4.94773	17.9176	TCF7L2;GATA4;EBF3										r8 part of the trigeminal column	4/301	0.0141642	0.0587273	4.56078	19.4154	CDX2;MYC;PHOX2B;NFE2L2
																lateral part of alar p3	3/301	0.0267461	0.0777865	4.94773	17.9176	TCF7L2;LEF1;NR2F1										r8 part of the vestibular column	4/301	0.0141642	0.0587273	4.56078	19.4154	EBF3;OTX2;PHOX2B;KLF1
																lateral part of preisthmic periaqueductal gray	3/301	0.0267461	0.0777865	4.94773	17.9176	TCF7L2;EBF3;ESR1										r8 portion of the hypoglossal motor nucleus	4/301	0.0141642	0.0587273	4.56078	19.4154	ELF4;VDR;WT1;RUNX1
																lateral part of r10B	3/301	0.0267461	0.0777865	4.94773	17.9176	MYC;MYB;NFE2L2										r9 (gustatory) part of solitary complex	4/301	0.0141642	0.0587273	4.56078	19.4154	ELF4;WT1;PHOX2B;KLF1
																lateral part of r8B	3/301	0.0267461	0.0777865	4.94773	17.9176	MYC;KLF1;NFE2L2										r9 part of basointermediate reticular formation	4/301	0.0141642	0.0587273	4.56078	19.4154	ELF4;MYC;KLF1;NFE2L2
																lateral part of r9B	3/301	0.0267461	0.0777865	4.94773	17.9176	MYC;KLF1;NFE2L2										r9 part of nucleus of Roller	4/301	0.0141642	0.0587273	4.56078	19.4154	ELF4;WT1;RUNX1;NFE2L2
																lateral septal nucleus, intermedio-ventral part	3/301	0.0267461	0.0777865	4.94773	17.9176	SOX2;MNT;ERG										r9 part of trigeminal transition zone	4/301	0.0141642	0.0587273	4.56078	19.4154	MYC;MYB;RARA;NFE2L2
																lateral spiriform nucleus	3/301	0.0267461	0.0777865	4.94773	17.9176	TCF7L2;ERG;SPDEF										r9 part of ventral parvicellular reticular formation	4/301	0.0141642	0.0587273	4.56078	19.4154	MYC;MYB;KLF1;NFE2L2
																laterodorsal nucleus	3/301	0.0267461	0.0777865	4.94773	17.9176	TCF7L2;LEF1;OTX2										r9 portion of ambiguous motor nucleus (postmigratory)	4/301	0.0141642	0.0587273	4.56078	19.4154	CDX2;MYC;SOX13;NFE2L2
																layer 2 of AOV cortex	3/301	0.0267461	0.0777865	4.94773	17.9176	EOMES;HNF1A;GATA2										retropontine reticular area	4/301	0.0141642	0.0587273	4.56078	19.4154	ELF4;MYC;MYB;HOXB13
																layer 2 of PrS	3/301	0.0267461	0.0777865	4.94773	17.9176	NFE2;TCF4;POU5F1										retrosplenial cortex	4/301	0.0141642	0.0587273	4.56078	19.4154	KLF5;BHLHE40;ERF;NR3C1
																layer 3 of AOV cortex	3/301	0.0267461	0.0777865	4.94773	17.9176	NR2F1;HNF1A;GATA2										reuniens nucleus, main part	4/301	0.0141642	0.0587273	4.56078	19.4154	SOX2;TCF7L2;REST;LEF1
																layer 3 of PaS	3/301	0.0267461	0.0777865	4.94773	17.9176	TCF4;NR3C1;POU5F1										rhombomere 5	4/301	0.0141642	0.0587273	4.56078	19.4154	ELF4;MYC;HOXB13;KLF1
																layer 3 of PrS	3/301	0.0267461	0.0777865	4.94773	17.9176	BHLHE40;TCF4;NR3C1										rhombomere 7	4/301	0.0141642	0.0587273	4.56078	19.4154	ELF4;MYC;KLF1;NFE2L2
																layer 3 of RSC	3/301	0.0267461	0.0777865	4.94773	17.9176	NR2F1;ERF;TCF4										rostral interstitial nucleus	4/301	0.0141642	0.0587273	4.56078	19.4154	FOXA1;TCF7L2;EBF3;MITF
																layer 5 of PaS	3/301	0.0267461	0.0777865	4.94773	17.9176	TCF4;NR3C1;ETV5										shell of p3ZL	4/301	0.0141642	0.0587273	4.56078	19.4154	SOX2;TCF7L2;REST;LEF1
																layer 6 of PrS	3/301	0.0267461	0.0777865	4.94773	17.9176	BHLHE40;TCF4;NR3C1										striatal septum	4/301	0.0141642	0.0587273	4.56078	19.4154	SOX2;EOMES;REST;EBF3
																layer 6a of PrS	3/301	0.0267461	0.0777865	4.94773	17.9176	BHLHE40;TCF4;NR3C1										sublayer 6a of OCx	4/301	0.0141642	0.0587273	4.56078	19.4154	BHLHE40;ERG;NR3C1;MEF2D
																liminal alar domain of m1	3/301	0.0267461	0.0777865	4.94773	17.9176	TCF7L2;EBF3;HOXB13										sublayer 6b of CCx	4/301	0.0141642	0.0587273	4.56078	19.4154	EGR3;NR3C1;GATA1;ETV5
																liminal nucleus	3/301	0.0267461	0.0777865	4.94773	17.9176	TCF7L2;LEF1;EBF3										submammillothalamic nucleus	4/301	0.0141642	0.0587273	4.56078	19.4154	FOXA1;NFIL3;WT1;ERG
																liminal part of alar isthmus	3/301	0.0267461	0.0777865	4.94773	17.9176	GATA4;EBF3;SPDEF										submedius thalamic nucleus	4/301	0.0141642	0.0587273	4.56078	19.4154	SOX2;TCF7L2;REST;LEF1
																liminal part of the r10 alar plate	3/301	0.0267461	0.0777865	4.94773	17.9176	MYC;MYB;NFE2L2										substantia nigra compacta, isthmic part	4/301	0.0141642	0.0587273	4.56078	19.4154	FOXA1;SPDEF;KLF1;FOXA2
																liminal part of the r7 alar plate	3/301	0.0267461	0.0777865	4.94773	17.9176	MYC;MYB;NFE2L2										superficial stratum of AOB	4/301	0.0141642	0.0587273	4.56078	19.4154	EOMES;MITF;PRDM1;GATA1
																m1AD (DM) part of periaqueductal gray	3/301	0.0267461	0.0777865	4.94773	17.9176	TCF7L2;LEF1;HOXB13										superficial stratum of AOV	4/301	0.0141642	0.0587273	4.56078	19.4154	EOMES;HNF1A;GATA2;FOSL2
																m1Lim (VL) part of the periaqueductal gray	3/301	0.0267461	0.0777865	4.94773	17.9176	TCF7L2;EBF3;HOXB13										superficial stratum of PO1	4/301	0.0141642	0.0587273	4.56078	19.4154	AR;KLF4;SPDEF;NFE2L2
																m2 basal plate	3/301	0.0267461	0.0777865	4.94773	17.9176	FOXA1;EBF3;FOXA2										superficial stratum of PO2	4/301	0.0141642	0.0587273	4.56078	19.4154	ERG;KLF4;ESR1;SPDEF
																magnocellular (medial) subparafascicular nucleus	3/301	0.0267461	0.0777865	4.94773	17.9176	TCF7L2;LEF1;EBF3										superficial stratum of PaS (cortical plate/marginal zone)	4/301	0.0141642	0.0587273	4.56078	19.4154	ELF1;KLF5;TCF4;POU5F1
																mantle zone of AOV	3/301	0.0267461	0.0777865	4.94773	17.9176	EOMES;HNF1A;GATA2										superficial stratum of m1AD	4/301	0.0141642	0.0587273	4.56078	19.4154	TCF7L2;LEF1;OTX2;ERG
																mantle zone of CoPL	3/301	0.0267461	0.0777865	4.94773	17.9176	TCF7L2;OTX2;SPDEF										superficial stratum of r3Ve	4/301	0.0141642	0.0587273	4.56078	19.4154	OTX2;HNF1A;GATA1;PHOX2B
																mantle zone of Ist	3/301	0.0267461	0.0777865	4.94773	17.9176	NEUROD1;GATA4;HNF1A										superficial stratum of r5BM	4/301	0.0141642	0.0587273	4.56078	19.4154	ELF4;WT1;POU5F1;KLF1
																mantle zone of RtC	3/301	0.0267461	0.0777865	4.94773	17.9176	TCF7L2;LEF1;NR2F1										superficial stratum of r6BI	4/301	0.0141642	0.0587273	4.56078	19.4154	ELF4;WT1;MITF;FOXA3
																mantle zone of S	3/301	0.0267461	0.0777865	4.94773	17.9176	AR;BHLHE40;NR3C1										superficial stratum of r7Ve	4/301	0.0141642	0.0587273	4.56078	19.4154	HNF4G;OTX2;PHOX2B;KLF1
																mantle zone of StrSe	3/301	0.0267461	0.0777865	4.94773	17.9176	SOX2;EOMES;EBF3										superficial stratum of r9Lim	4/301	0.0141642	0.0587273	4.56078	19.4154	CDX2;MYC;SOX13;NFE2L2
																mantle zone of TG	3/301	0.0267461	0.0777865	4.94773	17.9176	TCF7L2;LEF1;OTX2										ventral posterolateral nucleus	4/301	0.0141642	0.0587273	4.56078	19.4154	TCF7L2;LEF1;NR2F1;SPDEF
																mantle zone of cerebellar vermis	3/301	0.0267461	0.0777865	4.94773	17.9176	NEUROD1;MAX;FOXA2										ventromedial preoptic nucleus	4/301	0.0141642	0.0587273	4.56078	19.4154	ERG;KLF4;ESR1;SPDEF
																mantle zone of isBI	3/301	0.0267461	0.0777865	4.94773	17.9176	FOXA1;KLF1;FOXA2										Rhomboid nucleus	4/345	0.0221748	0.0917464	3.96339	15.0958	SOX2;TCF7L2;REST;LEF1
																mantle zone of isLim	3/301	0.0267461	0.0777865	4.94773	17.9176	GATA4;EBF3;SPDEF										Paracentral nucleus	4/353	0.0238764	0.0985785	3.87096	14.4575	SMAD2;TCF7L2;LEF1;NR3C1
																mantle zone of m1AD	3/301	0.0267461	0.0777865	4.94773	17.9176	TCF7L2;LEF1;OTX2										Anteromedial nucleus	4/357	0.0247564	0.101996	3.82632	14.1523	SMAD2;TCF7L2;LEF1;MITF
																mantle zone of m1AL	3/301	0.0267461	0.0777865	4.94773	17.9176	TCF7L2;GATA4;EBF3										Inferior colliculus	4/377	0.0294501	0.12108	3.61745	12.7517	NEUROD1;TCF7L2;SOX17;OTX2
																mantle zone of m1Lim	3/301	0.0267461	0.0777865	4.94773	17.9176	TCF7L2;EBF3;HOXB13										Nucleus incertus	4/398	0.0349133	0.134231	3.42097	11.477	ELF4;HOXB13;FOXA3;NR2F6
																mantle zone of m2AD	3/301	0.0267461	0.0777865	4.94773	17.9176	TCF7L2;LEF1;HOXB13										Medial preoptic nucleus	4/410	0.0382838	0.134231	3.31782	10.8251	AR;MNT;ERG;ESR1
																mantle zone of m2ADL	3/301	0.0267461	0.0777865	4.94773	17.9176	NEUROD1;TCF7L2;GATA4										lateral posterior nucleus	5/602	0.0385941	0.134231	2.84184	9.24921	TCF7L2;LEF1;OTX2;ERG;ESR1
																mantle zone of m2B	3/301	0.0267461	0.0777865	4.94773	17.9176	FOXA1;EBF3;FOXA2										Central amygdalar nucleus, capsular part	4/433	0.0452525	0.134231	3.13624	9.70823	KLF5;NR2F1;GATA3;NR2F6
																mantle zone of p1B	3/301	0.0267461	0.0777865	4.94773	17.9176	FOXA1;EBF3;FOXA2										Induseum griseum	4/435	0.0458901	0.134231	3.12137	9.61852	SMAD2;PRDM1;GATA1;FOXA3
																mantle zone of p2ZL	3/301	0.0267461	0.0777865	4.94773	17.9176	TCF7L2;LEF1;NR2F1										AOB, internal plexiform layer	3/301	0.0667382	0.134231	3.35115	9.0715	EOMES;PRDM1;GATA1
																mantle zone of p3ZL	3/301	0.0267461	0.0777865	4.94773	17.9176	TCF7L2;LEF1;NR2F1										Abducens nucleus	3/301	0.0667382	0.134231	3.35115	9.0715	ELF4;SOX13;FOXA3
																mantle zone of r10BL	3/301	0.0267461	0.0777865	4.94773	17.9176	MYC;MYB;NFE2L2										Accessory olfactory bulb, glomerular layer	3/301	0.0667382	0.134231	3.35115	9.0715	EOMES;PRDM1;HNF1A
																mantle zone of r10BM	3/301	0.0267461	0.0777865	4.94773	17.9176	HOXB13;RUNX1;NFE2L2										Anterior cingulate area, dorsal part, layer 2/3	3/301	0.0667382	0.134231	3.35115	9.0715	REST;ERG;GATA1
																mantle zone of r10Lim	3/301	0.0267461	0.0777865	4.94773	17.9176	MYC;MYB;NFE2L2										Anterior cingulate area, ventral part, layer 1	3/301	0.0667382	0.134231	3.35115	9.0715	PRDM1;KLF4;GATA1
																mantle zone of r1BI	3/301	0.0267461	0.0777865	4.94773	17.9176	FOXA1;SPDEF;KLF1										Anterior group of the dorsal thalamus	3/301	0.0667382	0.134231	3.35115	9.0715	SMAD2;TCF7L2;LEF1
																mantle zone of r7Lim	3/301	0.0267461	0.0777865	4.94773	17.9176	MYC;MYB;NFE2L2										Anterior hypothalamic nucleus, anterior part	3/301	0.0667382	0.134231	3.35115	9.0715	ERG;KLF4;ESR1
																mantle zone of r8BL	3/301	0.0267461	0.0777865	4.94773	17.9176	MYC;KLF1;NFE2L2										Anterior olfactory nucleus, posteroventral part	3/301	0.0667382	0.134231	3.35115	9.0715	EOMES;GATA2;FOSL2
																mantle zone of r8Ve	3/301	0.0267461	0.0777865	4.94773	17.9176	OTX2;EBF3;KLF1										Anterior pretectal nucleus	3/301	0.0667382	0.134231	3.35115	9.0715	TCF7L2;GATA3;POU5F1
																mantle zone of r9BI	3/301	0.0267461	0.0777865	4.94773	17.9176	MYC;KLF1;NFE2L2										Anterodorsal preoptic nucleus	3/301	0.0667382	0.134231	3.35115	9.0715	AR;WT1;ESR1
																mantle zone of r9BL	3/301	0.0267461	0.0777865	4.94773	17.9176	MYC;KLF1;NFE2L2										Anteromedial nucleus, ventral part	3/301	0.0667382	0.134231	3.35115	9.0715	SMAD2;TCF7L2;LEF1
																mantle zone of the PBC	3/301	0.0267461	0.0777865	4.94773	17.9176	NEUROD1;EBF3;ESR1										Anteromedial visual area, layer 5	3/301	0.0667382	0.134231	3.35115	9.0715	SOX17;BHLHE40;MEF2D
																medial amygdala, anteroventral part	3/301	0.0267461	0.0777865	4.94773	17.9176	NR2F1;HNF1B;FLI1										Anteroventral nucleus of thalamus	3/301	0.0667382	0.134231	3.35115	9.0715	TCF7L2;LEF1;FOXA2
																medial amygdala, posteroventral part	3/301	0.0267461	0.0777865	4.94773	17.9176	HNF1B;ESR1;FLI1										Anteroventral periventricular nucleus	3/301	0.0667382	0.134231	3.35115	9.0715	AR;KLF4;ESR1
																medial part of MPO	3/301	0.0267461	0.0777865	4.94773	17.9176	AR;ERG;ESR1										Arcuate hypothalamic nucleus	3/301	0.0667382	0.134231	3.35115	9.0715	CDX2;STAT3;ESR1
																medial part of r10B	3/301	0.0267461	0.0777865	4.94773	17.9176	HOXB13;RUNX1;NFE2L2										Basolateral amygdalar nucleus	3/301	0.0667382	0.134231	3.35115	9.0715	WT1;NR2F1;PBX2
																medial part of the lateral habenular nucleus	3/301	0.0267461	0.0777865	4.94773	17.9176	TCF7L2;LEF1;OTX2										Basolateral amygdalar nucleus, posterior part	3/301	0.0667382	0.134231	3.35115	9.0715	WT1;NR2F1;PBX2
																medial pretectal nucleus	3/301	0.0267461	0.0777865	4.94773	17.9176	TCF7L2;OTX2;SPDEF										Basomedial amygdalar nucleus, anterior part	3/301	0.0667382	0.134231	3.35115	9.0715	NR2F1;HNF1B;GATA3
																mediodorsal nucleus	3/301	0.0267461	0.0777865	4.94773	17.9176	TCF7L2;LEF1;OTX2										Basomedial amygdalar nucleus, posterior part	3/301	0.0667382	0.134231	3.35115	9.0715	NR2F1;HNF1B;ESR1
																mesomere 1	3/301	0.0267461	0.0777865	4.94773	17.9176	TCF7L2;LEF1;OTX2										Bed nuclei of the stria terminalis, anterior division	3/301	0.0667382	0.134231	3.35115	9.0715	SOX2;AR;ESR1
																neural plate	3/301	0.0267461	0.0777865	4.94773	17.9176	NEUROD1;EOMES;ETV5										Bed nuclei of the stria terminalis, anterior division, anteromedial area	3/301	0.0667382	0.134231	3.35115	9.0715	SOX2;AR;ESR1
																nucleus of the stria terminalis, medial division, anterior part	3/301	0.0267461	0.0777865	4.94773	17.9176	SOX2;AR;ERG										Bed nuclei of the stria terminalis, posterior division	3/301	0.0667382	0.134231	3.35115	9.0715	AR;NR2F1;ESR1
																p1B part of the periaqueductal gray	3/301	0.0267461	0.0777865	4.94773	17.9176	FOXA1;EBF3;FOXA2										Bed nuclei of the stria terminalis, posterior division, interfascicular nucleus	3/301	0.0667382	0.134231	3.35115	9.0715	AR;NR2F1;ESR1
																p2 portion of the parabrachial pigmented nucleus	3/301	0.0267461	0.0777865	4.94773	17.9176	FOXA1;EBF3;ERG										Bed nuclei of the stria terminalis, posterior division, principal nucleus	3/301	0.0667382	0.134231	3.35115	9.0715	SOX2;AR;ESR1
																p3 part of the ZL core	3/301	0.0267461	0.0777865	4.94773	17.9176	TCF7L2;LEF1;NR2F1										Bed nuclei of the stria terminalis, posterior division, transverse nucleus	3/301	0.0667382	0.134231	3.35115	9.0715	AR;NR2F1;ESR1
																para-abducens nucleus	3/301	0.0267461	0.0777865	4.94773	17.9176	MYB;HNF1A;HOXB13										Bed nucleus of the accessory olfactory tract	3/301	0.0667382	0.134231	3.35115	9.0715	SOX17;GATA3;FLI1
																parabrachial complex	3/301	0.0267461	0.0777865	4.94773	17.9176	NEUROD1;EBF3;ESR1										Caudoputamen	3/301	0.0667382	0.134231	3.35115	9.0715	EGR3;GATA3;FOXO1
																parabrachial part of the periaqueductal gray	3/301	0.0267461	0.0777865	4.94773	17.9176	TCF7L2;EBF3;ESR1										Cerebral cortex	3/301	0.0667382	0.134231	3.35115	9.0715	EOMES;EGR3;TCF4
																parastrial preoptic nucleus	3/301	0.0267461	0.0777865	4.94773	17.9176	AR;ERG;ESR1										Cerebral nuclei	3/301	0.0667382	0.134231	3.35115	9.0715	EGR3;GATA3;FOXO1
																parvicellular interstitial nucleus of the posterior commissure	3/301	0.0267461	0.0777865	4.94773	17.9176	TCF7L2;OTX2;SPDEF										Cochlear nuclei	3/301	0.0667382	0.134231	3.35115	9.0715	OTX2;GATA3;PHOX2B
																peduncular nucleus of the stria medullaris	3/301	0.0267461	0.0777865	4.94773	17.9176	LEF1;ERG;ESR1										Cochlear nucleus, subpedunclular granular region	3/301	0.0667382	0.134231	3.35115	9.0715	NEUROD1;NFE2;OTX2
																periventricular stratum of DTTh	3/301	0.0267461	0.0777865	4.94773	17.9176	SOX2;TCF7L2;LEF1										Copula pyramidis	3/301	0.0667382	0.134231	3.35115	9.0715	NEUROD1;NFE2;MAX
																periventricular stratum of Dg	3/301	0.0267461	0.0777865	4.94773	17.9176	AR;LEF1;ESR1										Copula pyramidis, granular layer	3/301	0.0667382	0.134231	3.35115	9.0715	NEUROD1;NFE2;MAX
																periventricular stratum of JcPL	3/301	0.0267461	0.0777865	4.94773	17.9176	TCF7L2;OTX2;SPDEF										Copula pyramidis, molecular layer	3/301	0.0667382	0.134231	3.35115	9.0715	NEUROD1;NFE2;MAX
																periventricular stratum of PcPL	3/301	0.0267461	0.0777865	4.94773	17.9176	TCF7L2;OTX2;SPDEF										Cortical amygdalar area, posterior part, lateral zone, layer 1	3/301	0.0667382	0.134231	3.35115	9.0715	VDR;ERF;FOXO1
																periventricular stratum of SC	3/301	0.0267461	0.0777865	4.94773	17.9176	TCF7L2;LEF1;OTX2										Cortical amygdalar area, posterior part, lateral zone, layer 2	3/301	0.0667382	0.134231	3.35115	9.0715	HNF4G;ERF;FOXO1
																periventricular stratum of SeDg	3/301	0.0267461	0.0777865	4.94773	17.9176	SOX2;AR;ERG										Cortical amygdalar area, posterior part, lateral zone, layer 3	3/301	0.0667382	0.134231	3.35115	9.0715	NR2F1;HNF1B;ESR1
																periventricular stratum of TG	3/301	0.0267461	0.0777865	4.94773	17.9176	TCF7L2;LEF1;OTX2										Cortical amygdalar area, posterior part, medial zone, layer 1	3/301	0.0667382	0.134231	3.35115	9.0715	ERF;PBX2;FOXO1
																periventricular stratum of VTTh	3/301	0.0267461	0.0777865	4.94773	17.9176	TCF7L2;LEF1;EBF3										Cortical amygdalar area, posterior part, medial zone, layer 2	3/301	0.0667382	0.134231	3.35115	9.0715	VDR;ERF;FOXO1
																periventricular stratum of cerebellar vermis	3/301	0.0267461	0.0777865	4.94773	17.9176	NEUROD1;MAX;FOXA2										Cortical amygdalar area, posterior part, medial zone, layer 3	3/301	0.0667382	0.134231	3.35115	9.0715	NR2F1;HNF1B;ESR1
																periventricular stratum of m1AD	3/301	0.0267461	0.0777865	4.94773	17.9176	TCF7L2;LEF1;HOXB13										Cortical plate	3/301	0.0667382	0.134231	3.35115	9.0715	EOMES;EGR3;TCF4
																periventricular stratum of m1Lim	3/301	0.0267461	0.0777865	4.94773	17.9176	TCF7L2;EBF3;HOXB13										Cortical subplate	3/301	0.0667382	0.134231	3.35115	9.0715	NR2F1;GATA3;NR2F6
																periventricular stratum of m2AD	3/301	0.0267461	0.0777865	4.94773	17.9176	TCF7L2;LEF1;HOXB13										Cuneate nucleus	3/301	0.0667382	0.134231	3.35115	9.0715	AR;OTX2;KLF1
																periventricular stratum of m2ADL	3/301	0.0267461	0.0777865	4.94773	17.9176	TCF7L2;EBF3;ESR1										Declive (VI)	3/301	0.0667382	0.134231	3.35115	9.0715	NEUROD1;MAX;MYOD1
																periventricular stratum of m2AL	3/301	0.0267461	0.0777865	4.94773	17.9176	TCF7L2;EBF3;ESR1										Dorsal column nuclei	3/301	0.0667382	0.134231	3.35115	9.0715	AR;OTX2;KLF1
																periventricular stratum of p1B	3/301	0.0267461	0.0777865	4.94773	17.9176	FOXA1;EBF3;FOXA2										Dorsal part of the lateral geniculate complex	3/301	0.0667382	0.134231	3.35115	9.0715	TCF7L2;LEF1;GATA3
																periventricular stratum of p2Lim	3/301	0.0267461	0.0777865	4.94773	17.9176	TCF7L2;LEF1;EBF3										Dorsomedial nucleus of the hypothalamus	3/301	0.0667382	0.134231	3.35115	9.0715	SOX2;ERG;ESR1
																periventricular stratum of p3ZL	3/301	0.0267461	0.0777865	4.94773	17.9176	SOX2;TCF7L2;LEF1										Dorsomedial nucleus of the hypothalamus, posterior part	3/301	0.0667382	0.134231	3.35115	9.0715	SOX2;ERG;ESR1
																periventricular stratum of r2Co	3/301	0.0267461	0.0777865	4.94773	17.9176	NEUROD1;EOMES;NFE2										Entorhinal area, lateral part, layer 1	3/301	0.0667382	0.134231	3.35115	9.0715	NFIL3;ERF;SPDEF
																periventricular stratum of r9BM	3/301	0.0267461	0.0777865	4.94773	17.9176	VDR;RUNX1;NFE2L2										Entorhinal area, lateral part, layer 2a	3/301	0.0667382	0.134231	3.35115	9.0715	ERF;SPDEF;NR2F6
																periventricular stratum of the PBC	3/301	0.0267461	0.0777865	4.94773	17.9176	TCF7L2;EBF3;ESR1										Entorhinal area, medial part, dorsal zone	3/301	0.0667382	0.134231	3.35115	9.0715	KLF5;GATA3;NR2F6
																periventricular stratum of the VAP	3/301	0.0267461	0.0777865	4.94773	17.9176	NR2F1;OTX2;ESR1										Entorhinal area, medial part, dorsal zone, layer 1	3/301	0.0667382	0.134231	3.35115	9.0715	GATA3;POU5F1;NR2F6
																posterior (ventral) nucleus	3/301	0.0267461	0.0777865	4.94773	17.9176	TCF7L2;LEF1;NR3C1										Entorhinal area, medial part, dorsal zone, layer 5	3/301	0.0667382	0.134231	3.35115	9.0715	KLF5;PBX2;TCF4
																posterior paraventricular nucleus	3/301	0.0267461	0.0777865	4.94773	17.9176	TCF7L2;LEF1;SPDEF										Entorhinal area, medial part, dorsal zone, layer 6	3/301	0.0667382	0.134231	3.35115	9.0715	KLF5;PBX2;NR3C1
																posteromedial visual area, layer 2/3	3/301	0.0267461	0.0777865	4.94773	17.9176	SOX17;BHLHE40;KLF4										Entorhinal area, medial part, ventral zone, layer 1	3/301	0.0667382	0.134231	3.35115	9.0715	KLF5;ERF;NR2F6
																posteromedial visual area, layer 4	3/301	0.0267461	0.0777865	4.94773	17.9176	SOX17;BHLHE40;KLF4										External cuneate nucleus	3/301	0.0667382	0.134231	3.35115	9.0715	CDX2;HNF4G;OTX2
																preisthmic tegmentum	3/301	0.0267461	0.0777865	4.94773	17.9176	FOXA1;EBF3;FOXA2										Folium-tuber vermis (VII)	3/301	0.0667382	0.134231	3.35115	9.0715	NEUROD1;SMAD2;MAX
																prerubral area	3/301	0.0267461	0.0777865	4.94773	17.9176	FOXA1;TCF7L2;EBF3										Folium-tuber vermis (VII), granular layer	3/301	0.0667382	0.134231	3.35115	9.0715	NEUROD1;SMAD2;MAX
																pretectal tegmentum	3/301	0.0267461	0.0777865	4.94773	17.9176	FOXA1;EBF3;FOXA2										Folium-tuber vermis (VII), molecular layer	3/301	0.0667382	0.134231	3.35115	9.0715	NEUROD1;SMAD2;MAX
																prethalamic (p3) zona limitans domain	3/301	0.0267461	0.0777865	4.94773	17.9176	TCF7L2;LEF1;NR2F1										Frontal pole, cerebral cortex	3/301	0.0667382	0.134231	3.35115	9.0715	EOMES;MITF;PRDM1
																prethalamus	3/301	0.0267461	0.0777865	4.94773	17.9176	TCF7L2;LEF1;NR2F1										Frontal pole, layer 2/3	3/301	0.0667382	0.134231	3.35115	9.0715	EOMES;MITF;PRDM1
																principal pretectal nucleus	3/301	0.0267461	0.0777865	4.94773	17.9176	TCF7L2;PBX2;SPDEF										Geniculate group, dorsal thalamus	3/301	0.0667382	0.134231	3.35115	9.0715	TCF7L2;LEF1;GATA3
																prosomere 1	3/301	0.0267461	0.0777865	4.94773	17.9176	FOXA1;TCF7L2;SPDEF										Geniculate group, ventral thalamus	3/301	0.0667382	0.134231	3.35115	9.0715	TCF7L2;LEF1;GATA3
																prosomere 3	3/301	0.0267461	0.0777865	4.94773	17.9176	TCF7L2;LEF1;NR2F1										Globus pallidus, internal segment	3/301	0.0667382	0.134231	3.35115	9.0715	LEF1;GATA3;FLI1
																pyramidal layer of S	3/301	0.0267461	0.0777865	4.94773	17.9176	AR;BHLHE40;NR3C1										Granular lamina of the cochlear nuclei	3/301	0.0667382	0.134231	3.35115	9.0715	OTX2;HNF1A;PHOX2B
																r1 part of basointermediate reticular formation	3/301	0.0267461	0.0777865	4.94773	17.9176	FOXA1;SPDEF;KLF1										Hypothalamus	3/301	0.0667382	0.134231	3.35115	9.0715	AR;ESR1;NR2F6
																r10 basal plate	3/301	0.0267461	0.0777865	4.94773	17.9176	MYC;RUNX1;NFE2L2										Inferior colliculus, central nucleus	3/301	0.0667382	0.134231	3.35115	9.0715	TCF7L2;SOX17;OTX2
																r10 part of basointermediate reticular formation	3/301	0.0267461	0.0777865	4.94773	17.9176	MYC;MYB;NFE2L2										Inferior colliculus, external nucleus	3/301	0.0667382	0.134231	3.35115	9.0715	NEUROD1;TCF7L2;SOX17
																r10 part of basolateral reticular formation	3/301	0.0267461	0.0777865	4.94773	17.9176	MYC;MYB;NFE2L2										Inferior olivary complex	3/301	0.0667382	0.134231	3.35115	9.0715	AR;ELF4;NFE2L2
																r10 part of spinal trigeminal nucleus, caudal part	3/301	0.0267461	0.0777865	4.94773	17.9176	NFE2;EBF3;NFE2L2										Infralimbic area	3/301	0.0667382	0.134231	3.35115	9.0715	SOX17;PRDM1;GATA1
																r10 portion of the hypoglossal motor nucleus	3/301	0.0267461	0.0777865	4.94773	17.9176	VDR;MYB;RUNX1										Infralimbic area, layer 2/3	3/301	0.0667382	0.134231	3.35115	9.0715	PRDM1;HNF1A;GATA1
																r2 part of anteroventral cochlear nucleus	3/301	0.0267461	0.0777865	4.94773	17.9176	NEUROD1;NFE2;OTX2										Interbrain	3/301	0.0667382	0.134231	3.35115	9.0715	TCF7L2;LEF1;ESR1
																r2 part of dorsal cochlear nucleus	3/301	0.0267461	0.0777865	4.94773	17.9176	NEUROD1;EOMES;NFE2										Intercalated amygdalar nucleus	3/301	0.0667382	0.134231	3.35115	9.0715	NR2F1;HNF1B;GATA3
																r3 part of anteroventral cochlear nucleus	3/301	0.0267461	0.0777865	4.94773	17.9176	NFE2;OTX2;HNF1A										Intergeniculate leaflet of the lateral geniculate complex	3/301	0.0667382	0.134231	3.35115	9.0715	TCF7L2;LEF1;GATA3
																r3 part of basomedial reticular formation	3/301	0.0267461	0.0777865	4.94773	17.9176	RARA;HOXB13;FOXA2										Interpeduncular nucleus	3/301	0.0667382	0.134231	3.35115	9.0715	FOXA1;REST;VDR
																r5 basal plate	3/301	0.0267461	0.0777865	4.94773	17.9176	MYC;HOXB13;KLF1										Interposed nucleus	3/301	0.0667382	0.134231	3.35115	9.0715	NEUROD1;ELF4;FOXA2
																r5 part of basolateral reticular formation	3/301	0.0267461	0.0777865	4.94773	17.9176	MYC;HOXB13;KLF1										Intralaminar nuclei of the dorsal thalamus	3/301	0.0667382	0.134231	3.35115	9.0715	TCF7L2;REST;LEF1
																r5 part of basomedial reticular formation	3/301	0.0267461	0.0777865	4.94773	17.9176	MYC;HOXB13;FOXA2										JcPL part of the periaqueductal gray	3/301	0.0667382	0.134231	3.35115	9.0715	TCF7L2;OTX2;SPDEF
																r7 alar plate	3/301	0.0267461	0.0777865	4.94773	17.9176	MYC;KLF1;NFE2L2										Koelliker-Fuse nucleus	3/301	0.0667382	0.134231	3.35115	9.0715	NEUROD1;FLI1;SPDEF
																r8 alar plate	3/301	0.0267461	0.0777865	4.94773	17.9176	MYC;KLF1;NFE2L2										Lateral dorsal nucleus of thalamus	3/301	0.0667382	0.134231	3.35115	9.0715	TCF7L2;LEF1;OTX2
																r8 part of basointermediate reticular formation	3/301	0.0267461	0.0777865	4.94773	17.9176	MYC;KLF1;NFE2L2										Lateral reticular nucleus	3/301	0.0667382	0.134231	3.35115	9.0715	AR;MYC;NFE2L2
																r8 part of dorsal parvicellular reticular formation	3/301	0.0267461	0.0777865	4.94773	17.9176	MYC;KLF1;NFE2L2										Lateral reticular nucleus, parvicellular part	3/301	0.0667382	0.134231	3.35115	9.0715	CDX2;NR2F6;NFE2L2
																r8 part of the vestibular column	3/301	0.0267461	0.0777865	4.94773	17.9176	OTX2;EBF3;KLF1										Lateral septal nucleus, ventral part	3/301	0.0667382	0.134231	3.35115	9.0715	SOX2;EOMES;AR
																r9 part of basointermediate reticular formation	3/301	0.0267461	0.0777865	4.94773	17.9176	MYC;KLF1;NFE2L2										Lateral visual area, layer 6b	3/301	0.0667382	0.134231	3.35115	9.0715	KLF5;PBX2;NR3C1
																r9 part of the basolateral reticular formation	3/301	0.0267461	0.0777865	4.94773	17.9176	MYC;KLF1;NFE2L2										Medial geniculate complex	3/301	0.0667382	0.134231	3.35115	9.0715	TCF7L2;LEF1;GATA3
																reticular complex	3/301	0.0267461	0.0777865	4.94773	17.9176	TCF7L2;LEF1;NR2F1										Medial geniculate complex, dorsal part	3/301	0.0667382	0.134231	3.35115	9.0715	TCF7L2;LEF1;GATA3
																reticular nucleus	3/301	0.0267461	0.0777865	4.94773	17.9176	TCF7L2;LEF1;NR2F1										Medial geniculate complex, ventral part	3/301	0.0667382	0.134231	3.35115	9.0715	TCF7L2;LEF1;GATA3
																retropontine reticular area	3/301	0.0267461	0.0777865	4.94773	17.9176	MYC;MYB;HOXB13										Medial pretectal area	3/301	0.0667382	0.134231	3.35115	9.0715	TCF7L2;OTX2;SPDEF
																retrosplenial cortex	3/301	0.0267461	0.0777865	4.94773	17.9176	BHLHE40;ERF;NR3C1										Median preoptic nucleus	3/301	0.0667382	0.134231	3.35115	9.0715	REST;KLF4;ESR1
																reuniens nucleus, main part	3/301	0.0267461	0.0777865	4.94773	17.9176	SOX2;TCF7L2;LEF1										Medullary reticular nucleus, dorsal part	3/301	0.0667382	0.134231	3.35115	9.0715	AR;CDX2;MYC
																rhombomere 10	3/301	0.0267461	0.0777865	4.94773	17.9176	MYC;MYB;NFE2L2										Midbrain, behavioral state related	3/301	0.0667382	0.134231	3.35115	9.0715	FOXA1;GATA3;NR2F6
																rhombomere 5	3/301	0.0267461	0.0777865	4.94773	17.9176	MYC;HOXB13;KLF1										Midbrain, sensory related	3/301	0.0667382	0.134231	3.35115	9.0715	TCF7L2;SOX17;OTX2
																rhombomere 7	3/301	0.0267461	0.0777865	4.94773	17.9176	MYC;KLF1;NFE2L2										Nucleus ambiguus, dorsal division	3/301	0.0667382	0.134231	3.35115	9.0715	AR;MYC;NFE2L2
																rostral interstitial nucleus	3/301	0.0267461	0.0777865	4.94773	17.9176	FOXA1;TCF7L2;EBF3										Nucleus of the lateral lemniscus, ventral part	3/301	0.0667382	0.134231	3.35115	9.0715	GATA4;GATA3;SPDEF
																shell of p3ZL	3/301	0.0267461	0.0777865	4.94773	17.9176	SOX2;TCF7L2;LEF1										Nucleus of the lateral olfactory tract, layer 3	3/301	0.0667382	0.134231	3.35115	9.0715	NR2F1;GATA3;FLI1
																striatal septum	3/301	0.0267461	0.0777865	4.94773	17.9176	SOX2;EOMES;EBF3										Nucleus of the posterior commissure	3/301	0.0667382	0.134231	3.35115	9.0715	TCF7L2;PRDM1;POU5F1
																subethmoid nucleus	3/301	0.0267461	0.0777865	4.94773	17.9176	TCF7L2;LEF1;NR3C1										Nucleus of the solitary tract, lateral part	3/301	0.0667382	0.134231	3.35115	9.0715	AR;PHOX2B;KLF1
																submedius thalamic nucleus	3/301	0.0267461	0.0777865	4.94773	17.9176	SOX2;TCF7L2;LEF1										Olfactory areas	3/301	0.0667382	0.134231	3.35115	9.0715	EOMES;MITF;FOSL2
																substantia innominata/basal nucleus	3/301	0.0267461	0.0777865	4.94773	17.9176	SOX2;ESR1;FLI1										Orbital area, lateral part, layer 5	3/301	0.0667382	0.134231	3.35115	9.0715	HNF4G;PRDM1;FLI1
																superficial mantle of isBM	3/301	0.0267461	0.0777865	4.94773	17.9176	FOXA1;SPDEF;FOXA2										Parabrachial nucleus	3/301	0.0667382	0.134231	3.35115	9.0715	NEUROD1;GATA3;SPDEF
																superficial stratum of AOV	3/301	0.0267461	0.0777865	4.94773	17.9176	EOMES;HNF1A;GATA2										Parabrachial nucleus, lateral division, dorsal lateral part	3/301	0.0667382	0.134231	3.35115	9.0715	NEUROD1;SMAD2;MAX
																superficial stratum of DTTh	3/301	0.0267461	0.0777865	4.94773	17.9176	TCF7L2;LEF1;OTX2										Parabrachial nucleus, lateral division, external lateral part	3/301	0.0667382	0.134231	3.35115	9.0715	NEUROD1;GATA3;SPDEF
																superficial stratum of S	3/301	0.0267461	0.0777865	4.94773	17.9176	AR;BHLHE40;NR3C1										Parabrachial nucleus, lateral division, superior lateral part	3/301	0.0667382	0.134231	3.35115	9.0715	NEUROD1;MAX;GATA3
																superficial stratum of r10Tr	3/301	0.0267461	0.0777865	4.94773	17.9176	NFE2;EBF3;NFE2L2										Paragigantocellular reticular nucleus, dorsal part	3/301	0.0667382	0.134231	3.35115	9.0715	ELF4;RUNX1;NR2F6
																superficial stratum of r2Co	3/301	0.0267461	0.0777865	4.94773	17.9176	NEUROD1;NFE2;OTX2										Paragigantocellular reticular nucleus, lateral part	3/301	0.0667382	0.134231	3.35115	9.0715	AR;FOXA3;NFE2L2
																superficial stratum of r3Co	3/301	0.0267461	0.0777865	4.94773	17.9176	NFE2;OTX2;HNF1A										Parasubiculum, layer 2	3/301	0.0667382	0.134231	3.35115	9.0715	NFE2;WT1;POU5F1
																tectal gray formation	3/301	0.0267461	0.0777865	4.94773	17.9176	TCF7L2;LEF1;OTX2										Paraventricular hypothalamic nucleus, descending division	3/301	0.0667382	0.134231	3.35115	9.0715	ERG;KLF4;ESR1
																thalamic (p2) zona limitans domain	3/301	0.0267461	0.0777865	4.94773	17.9176	TCF7L2;LEF1;NR2F1										Paraventricular hypothalamic nucleus, descending division, lateral parvicellular part	3/301	0.0667382	0.134231	3.35115	9.0715	ERG;KLF4;ESR1
																thalamic tegmentum	3/301	0.0267461	0.0777865	4.94773	17.9176	FOXA1;TCF7L2;EBF3										Paraventricular hypothalamic nucleus, magnocellular division	3/301	0.0667382	0.134231	3.35115	9.0715	REST;ERG;ESR1
																triangular septal nucleus	3/301	0.0267461	0.0777865	4.94773	17.9176	SOX2;EOMES;EBF3										Paraventricular hypothalamic nucleus, magnocellular division, posterior magnocellular part	3/301	0.0667382	0.134231	3.35115	9.0715	REST;ERG;ESR1
																upper dorsal lateral hypothalamic area	3/301	0.0267461	0.0777865	4.94773	17.9176	LEF1;ESR1;FLI1										Paraventricular hypothalamic nucleus, magnocellular division, posterior magnocellular part, lateral zone	3/301	0.0667382	0.134231	3.35115	9.0715	REST;ERG;ESR1
																ventral lateral nucleus	3/301	0.0267461	0.0777865	4.94773	17.9176	TCF7L2;LEF1;NR2F1										Parvicellular reticular nucleus	3/301	0.0667382	0.134231	3.35115	9.0715	AR;CDX2;PHOX2B
																ventral linear nucleus	3/301	0.0267461	0.0777865	4.94773	17.9176	TCF7L2;LEF1;HNF1A										PcPL part of the periaqueductal gray	3/301	0.0667382	0.134231	3.35115	9.0715	TCF7L2;OTX2;SPDEF
																ventral nuclei	3/301	0.0267461	0.0777865	4.94773	17.9176	TCF7L2;LEF1;NR2F1										Pons, behavioral state related	3/301	0.0667382	0.134231	3.35115	9.0715	ELF4;GATA3;KLF1
																ventral paracommissural tectal nucleus, m1 part	3/301	0.0267461	0.0777865	4.94773	17.9176	TCF7L2;LEF1;OTX2										Pons, motor related	3/301	0.0667382	0.134231	3.35115	9.0715	ELF4;MYC;HOXB13
																ventral posteromedial nucleus	3/301	0.0267461	0.0777865	4.94773	17.9176	TCF7L2;LEF1;NR2F1										Pontine reticular nucleus	3/301	0.0667382	0.134231	3.35115	9.0715	ELF4;KLF1;NR2F6
																ventrolateral part of alar m1	3/301	0.0267461	0.0777865	4.94773	17.9176	TCF7L2;EBF3;HOXB13										Posterior complex of the thalamus	3/301	0.0667382	0.134231	3.35115	9.0715	TCF7L2;LEF1;NR3C1
																ventrolateral part of isA	3/301	0.0267461	0.0777865	4.94773	17.9176	GATA4;EBF3;SPDEF										Posterior pretectal nucleus	3/301	0.0667382	0.134231	3.35115	9.0715	TCF7L2;PBX2;OTX2
																white matter of cerebellar vermis	3/301	0.0267461	0.0777865	4.94773	17.9176	NEUROD1;MAX;FOXA2										Postpiriform transition area, layers 1	3/301	0.0667382	0.134231	3.35115	9.0715	VDR;ERF;NR2F1
																Thalamus	3/334	0.0348477	0.10118	4.44698	14.9275	TCF7L2;LEF1;GATA3										Postsubiculum, layer 1	3/301	0.0667382	0.134231	3.35115	9.0715	ELF1;SOX17;HNF4G
																Field CA1, stratum oriens	3/343	0.0372553	0.107991	4.32728	14.2366	AR;TCF4;NR3C1										Precommissural nucleus	3/301	0.0667382	0.134231	3.35115	9.0715	TCF7L2;ERG;SPDEF
																Rhomboid nucleus	3/345	0.0378017	0.109393	4.30154	14.0893	SOX2;TCF7L2;LEF1										Primary somatosensory area, nose	3/301	0.0667382	0.134231	3.35115	9.0715	REST;GATA2;RUNX1
																Paracentral nucleus	3/353	0.0400288	0.115646	4.2015	13.5211	TCF7L2;LEF1;NR3C1										Primary somatosensory area, nose, layer 5	3/301	0.0667382	0.134231	3.35115	9.0715	REST;GATA2;RUNX1
																Septofimbrial nucleus	3/431	0.0651153	0.187812	3.42214	9.3479	SOX2;EOMES;EBF3										Primary somatosensory area, unassigned, layer 6b	3/301	0.0667382	0.134231	3.35115	9.0715	KLF5;POU5F1;FLI1
																Central amygdalar nucleus, capsular part	3/433	0.0658362	0.189578	3.40587	9.26597	NR2F1;GATA3;NR2F6										Primary visual area, layer 2/3	3/301	0.0667382	0.134231	3.35115	9.0715	EGR3;KLF5;ERF
																Suprageniculate nucleus	3/478	0.0830201	0.212453	3.07611	7.65542	TCF7L2;LEF1;GATA3										Primary visual area, layer 5	3/301	0.0667382	0.134231	3.35115	9.0715	BHLHE40;ERF;KLF4
																AOB, outer plexiform layer	2/301	0.136603	0.212453	3.20711	6.38432	EOMES;HNF1A										Red nucleus	3/301	0.0667382	0.134231	3.35115	9.0715	FOXA1;KLF1;FOXA2
																Accessory facial motor nucleus	2/301	0.136603	0.212453	3.20711	6.38432	HOXB13;KLF1										Reticular nucleus of the thalamus	3/301	0.0667382	0.134231	3.35115	9.0715	TCF7L2;LEF1;NR2F1
																Accessory olfactory bulb, glomerular layer	2/301	0.136603	0.212453	3.20711	6.38432	EOMES;HNF1A										Retrohippocampal region	3/301	0.0667382	0.134231	3.35115	9.0715	TCF4;GATA3;NR2F6
																Agranular insular area, posterior part	2/301	0.136603	0.212453	3.20711	6.38432	HNF1A;FLI1										Retrosplenial area, dorsal part	3/301	0.0667382	0.134231	3.35115	9.0715	BHLHE40;HNF1A;ERG
																Agranular insular area, posterior part, layer 6a	2/301	0.136603	0.212453	3.20711	6.38432	HNF1A;FLI1										Retrosplenial area, dorsal part, layer 2/3	3/301	0.0667382	0.134231	3.35115	9.0715	BHLHE40;HNF1A;ERG
																Anterior group of the dorsal thalamus	2/301	0.136603	0.212453	3.20711	6.38432	TCF7L2;LEF1										Retrosplenial area, dorsal part, layer 5	3/301	0.0667382	0.134231	3.35115	9.0715	BHLHE40;HNF1A;ERG
																Anterior hypothalamic nucleus, central part	2/301	0.136603	0.212453	3.20711	6.38432	ERG;ESR1										Retrosplenial area, lateral agranular part, layer 1	3/301	0.0667382	0.134231	3.35115	9.0715	SMAD2;EGR3;HNF1A
																Anterior hypothalamic nucleus, posterior part	2/301	0.136603	0.212453	3.20711	6.38432	ERG;ESR1										Retrosplenial area, lateral agranular part, layer 6a	3/301	0.0667382	0.134231	3.35115	9.0715	SOX17;BHLHE40;MEF2D
																Anterior olfactory nucleus, dorsal part	2/301	0.136603	0.212453	3.20711	6.38432	SOX17;HNF1A										Retrosplenial area, lateral agranular part, layer 6b	3/301	0.0667382	0.134231	3.35115	9.0715	SOX17;BHLHE40;MEF2D
																Anterior olfactory nucleus, external part	2/301	0.136603	0.212453	3.20711	6.38432	EOMES;HNF1A										Retrosplenial area, ventral part, layer 5	3/301	0.0667382	0.134231	3.35115	9.0715	SOX13;HNF1A;ERG
																Anterior olfactory nucleus, layer 1	2/301	0.136603	0.212453	3.20711	6.38432	SOX17;HNF1A										Septohippocampal nucleus	3/301	0.0667382	0.134231	3.35115	9.0715	SOX2;REST;VDR
																Anterior olfactory nucleus, medial part	2/301	0.136603	0.212453	3.20711	6.38432	HNF1A;GATA2										Spinal nucleus of the trigeminal, caudal part	3/301	0.0667382	0.134231	3.35115	9.0715	CDX2;EBF3;NFE2L2
																Anterior olfactory nucleus, posteroventral part	2/301	0.136603	0.212453	3.20711	6.38432	EOMES;GATA2										Spinal nucleus of the trigeminal, oral part	3/301	0.0667382	0.134231	3.35115	9.0715	AR;GATA3;PHOX2B
																Anterodorsal preoptic nucleus	2/301	0.136603	0.212453	3.20711	6.38432	AR;ESR1										Spinal nucleus of the trigeminal, oral part, ventrolateral part	3/301	0.0667382	0.134231	3.35115	9.0715	AR;GATA3;PHOX2B
																Anterolateral visual area, layer 2/3	2/301	0.136603	0.212453	3.20711	6.38432	MNT;VDR										Spinal vestibular nucleus	3/301	0.0667382	0.134231	3.35115	9.0715	OTX2;HNF1A;GATA1
																Anteromedial nucleus, dorsal part	2/301	0.136603	0.212453	3.20711	6.38432	TCF7L2;LEF1										Striatum	3/301	0.0667382	0.134231	3.35115	9.0715	EGR3;GATA3;FOXO1
																Anteromedial nucleus, ventral part	2/301	0.136603	0.212453	3.20711	6.38432	TCF7L2;LEF1										Striatum dorsal region	3/301	0.0667382	0.134231	3.35115	9.0715	EGR3;GATA3;FOXO1
																Anteroventral preoptic nucleus	2/301	0.136603	0.212453	3.20711	6.38432	AR;KLF4										Subiculum, dorsal part	3/301	0.0667382	0.134231	3.35115	9.0715	BHLHE40;TCF4;NR3C1
																Basolateral amygdalar nucleus	2/301	0.136603	0.212453	3.20711	6.38432	NR2F1;PBX2										Subiculum, ventral part	3/301	0.0667382	0.134231	3.35115	9.0715	AR;GATA3;FOSL2
																Basolateral amygdalar nucleus, anterior part	2/301	0.136603	0.212453	3.20711	6.38432	NR2F1;PBX2										Subiculum, ventral part, molecular layer	3/301	0.0667382	0.134231	3.35115	9.0715	AR;GATA3;FOSL2
																Basolateral amygdalar nucleus, posterior part	2/301	0.136603	0.212453	3.20711	6.38432	NR2F1;PBX2										Subparafascicular area	3/301	0.0667382	0.134231	3.35115	9.0715	SOX2;TCF7L2;EBF3
																Basolateral amygdalar nucleus, ventral part	2/301	0.136603	0.212453	3.20711	6.38432	NR2F1;ESR1										Subparafascicular nucleus	3/301	0.0667382	0.134231	3.35115	9.0715	TCF7L2;LEF1;GATA3
																Bed nuclei of the stria terminalis	2/301	0.136603	0.212453	3.20711	6.38432	AR;ESR1										Subparaventricular zone	3/301	0.0667382	0.134231	3.35115	9.0715	SOX2;KLF4;ESR1
																Bed nuclei of the stria terminalis, anterior division, dorsomedial nucleus	2/301	0.136603	0.212453	3.20711	6.38432	AR;ESR1										Substantia nigra, compact part	3/301	0.0667382	0.134231	3.35115	9.0715	FOXA1;HNF4G;FOXA2
																Bed nuclei of the stria terminalis, anterior division, magnocellular nucleus	2/301	0.136603	0.212453	3.20711	6.38432	AR;ESR1										Superior central nucleus raphe	3/301	0.0667382	0.134231	3.35115	9.0715	RARA;GATA3;RUNX1
																Bed nuclei of the stria terminalis, anterior division, ventral nucleus	2/301	0.136603	0.212453	3.20711	6.38432	AR;ESR1										Superior central nucleus raphe, lateral part	3/301	0.0667382	0.134231	3.35115	9.0715	ELF4;GATA3;RUNX1
																Central amygdalar nucleus	2/301	0.136603	0.212453	3.20711	6.38432	NR2F1;GATA3										Superior colliculus, motor related, deep white layer	3/301	0.0667382	0.134231	3.35115	9.0715	TCF7L2;LEF1;OTX2
																Central amygdalar nucleus, medial part	2/301	0.136603	0.212453	3.20711	6.38432	GATA3;ESR1										Superior colliculus, motor related, intermediate gray layer, sublayer a	3/301	0.0667382	0.134231	3.35115	9.0715	TCF7L2;OTX2;SPDEF
																Central linear nucleus raphe	2/301	0.136603	0.212453	3.20711	6.38432	FOXA1;NR2F6										Superior colliculus, motor related, intermediate gray layer, sublayer c	3/301	0.0667382	0.134231	3.35115	9.0715	TCF7L2;OTX2;SPDEF
																Central lobule	2/301	0.136603	0.212453	3.20711	6.38432	NEUROD1;FOXA2										Superior olivary complex, lateral part	3/301	0.0667382	0.134231	3.35115	9.0715	AR;STAT3;PHOX2B
																Cerebral cortex	2/301	0.136603	0.212453	3.20711	6.38432	EOMES;TCF4										Supramammillary nucleus	3/301	0.0667382	0.134231	3.35115	9.0715	FOXA1;SMAD2;NFIL3
																CoPV part of the periaqueductal gray	2/301	0.136603	0.212453	3.20711	6.38432	TCF7L2;OTX2										Taenia tecta, dorsal part	3/301	0.0667382	0.134231	3.35115	9.0715	SOX17;GATA1;FOSL2
																Cochlear nuclei	2/301	0.136603	0.212453	3.20711	6.38432	OTX2;GATA3										Triangular nucleus of septum	3/301	0.0667382	0.134231	3.35115	9.0715	SOX2;EOMES;EBF3
																Cortical amygdalar area, anterior part, layer 1	2/301	0.136603	0.212453	3.20711	6.38432	VDR;GATA3										Ventral anterior-lateral complex of the thalamus	3/301	0.0667382	0.134231	3.35115	9.0715	TCF7L2;LEF1;NR2F1
																Cortical amygdalar area, posterior part, lateral zone, layer 1	2/301	0.136603	0.212453	3.20711	6.38432	VDR;ERF										Ventral cochlear nucleus	3/301	0.0667382	0.134231	3.35115	9.0715	NFE2;GATA3;PHOX2B
																Cortical amygdalar area, posterior part, medial zone, layer 1	2/301	0.136603	0.212453	3.20711	6.38432	ERF;PBX2										Ventral posterolateral nucleus of the thalamus, parvicellular part	3/301	0.0667382	0.134231	3.35115	9.0715	TCF7L2;LEF1;HNF1A
																Cortical amygdalar area, posterior part, medial zone, layer 2	2/301	0.136603	0.212453	3.20711	6.38432	VDR;ERF										Ventral posteromedial nucleus of the thalamus	3/301	0.0667382	0.134231	3.35115	9.0715	TCF7L2;LEF1;NR2F1
																Cortical plate	2/301	0.136603	0.212453	3.20711	6.38432	EOMES;TCF4										Ventral posteromedial nucleus of the thalamus, parvicellular part	3/301	0.0667382	0.134231	3.35115	9.0715	TCF7L2;LEF1;HNF1A
																Culmen	2/301	0.136603	0.212453	3.20711	6.38432	NEUROD1;MAX										Ventral premammillary nucleus	3/301	0.0667382	0.134231	3.35115	9.0715	AR;ERG;ESR1
																Declive (VI), granular layer	2/301	0.136603	0.212453	3.20711	6.38432	NEUROD1;MAX										Ventromedial hypothalamic nucleus, anterior part	3/301	0.0667382	0.134231	3.35115	9.0715	AR;ELF1;ESR1
																Declive (VI), molecular layer	2/301	0.136603	0.212453	3.20711	6.38432	NEUROD1;MYOD1										Ventromedial hypothalamic nucleus, central part	3/301	0.0667382	0.134231	3.35115	9.0715	AR;ERG;ESR1
																Dentate nucleus	2/301	0.136603	0.212453	3.20711	6.38432	NEUROD1;HNF1A										Visceral area	3/301	0.0667382	0.134231	3.35115	9.0715	HNF1A;FLI1;RUNX1
																Dorsal peduncular area	2/301	0.136603	0.212453	3.20711	6.38432	SOX17;VDR										Visceral area, layer 6b	3/301	0.0667382	0.134231	3.35115	9.0715	PBX2;FLI1;RUNX1
																Dorsal peduncular area, layer 1	2/301	0.136603	0.212453	3.20711	6.38432	SOX17;VDR										abducens motor nucleus	3/301	0.0667382	0.134231	3.35115	9.0715	ELF4;SOX13;HNF1A
																Dorsomedial nucleus of the hypothalamus, anterior part	2/301	0.136603	0.212453	3.20711	6.38432	SOX2;ESR1										alar plate of m1	3/301	0.0667382	0.134231	3.35115	9.0715	TCF7L2;LEF1;OTX2
																Entorhinal area, lateral part, layer 1	2/301	0.136603	0.212453	3.20711	6.38432	ERF;SPDEF										alar plate of p3 (alar prethalamus)	3/301	0.0667382	0.134231	3.35115	9.0715	TCF7L2;LEF1;NR2F1
																Entorhinal area, medial part, dorsal zone	2/301	0.136603	0.212453	3.20711	6.38432	GATA3;NR2F6										amygdalo-striatal transition	3/301	0.0667382	0.134231	3.35115	9.0715	AR;KLF5;OTX2
																Entorhinal area, medial part, dorsal zone, layer 5	2/301	0.136603	0.212453	3.20711	6.38432	PBX2;TCF4										anteroventral nucleus	3/301	0.0667382	0.134231	3.35115	9.0715	TCF7L2;LEF1;FOXA2
																Entorhinal area, medial part, dorsal zone, layer 6	2/301	0.136603	0.212453	3.20711	6.38432	PBX2;NR3C1										basal peduncular hypothalamus	3/301	0.0667382	0.134231	3.35115	9.0715	SMAD2;NFIL3;ESR1
																Entorhinal area, medial part, ventral zone	2/301	0.136603	0.212453	3.20711	6.38432	ERF;PBX2										basal plate of p1	3/301	0.0667382	0.134231	3.35115	9.0715	FOXA1;EBF3;FOXA2
																Entorhinal area, medial part, ventral zone, layer 1	2/301	0.136603	0.212453	3.20711	6.38432	ERF;NR2F6										basal plate of p2	3/301	0.0667382	0.134231	3.35115	9.0715	FOXA1;TCF7L2;EBF3
																Entorhinal area, medial part, ventral zone, layer 3	2/301	0.136603	0.212453	3.20711	6.38432	ERF;PBX2										basal plate of p3	3/301	0.0667382	0.134231	3.35115	9.0715	FOXA1;NFIL3;EBF3
																Epithalamus	2/301	0.136603	0.212453	3.20711	6.38432	TCF7L2;OTX2										basointermediate isthmic reticular formation	3/301	0.0667382	0.134231	3.35115	9.0715	FOXA1;KLF1;FOXA2
																Field CA1, pyramidal layer	2/301	0.136603	0.212453	3.20711	6.38432	AR;TCF4										basolateral amygdaloid nucleus, anterior part	3/301	0.0667382	0.134231	3.35115	9.0715	REST;WT1;NR2F1
																Field CA1, stratum pyramidale	2/301	0.136603	0.212453	3.20711	6.38432	AR;TCF4										basomedial amygdaloid nucleus, anterior part	3/301	0.0667382	0.134231	3.35115	9.0715	NR2F1;HNF1B;ESR1
																Field CA2, stratum pyramidale	2/301	0.136603	0.212453	3.20711	6.38432	AR;TCF4										basomedial amygdaloid nucleus, posterior part	3/301	0.0667382	0.134231	3.35115	9.0715	NR2F1;HNF1B;ESR1
																Folium-tuber vermis (VII)	2/301	0.136603	0.212453	3.20711	6.38432	NEUROD1;MAX										bed nucleus of stria terminalis, lateral amygdaloid division	3/301	0.0667382	0.134231	3.35115	9.0715	KLF5;SOX13;OTX2
																Folium-tuber vermis (VII), granular layer	2/301	0.136603	0.212453	3.20711	6.38432	NEUROD1;MAX										bed nucleus of the stria terminalis, mediocentral division	3/301	0.0667382	0.134231	3.35115	9.0715	AR;LEF1;ESR1
																Folium-tuber vermis (VII), molecular layer	2/301	0.136603	0.212453	3.20711	6.38432	NEUROD1;MAX										bed nucleus of the stria terminalis, medioseptal division	3/301	0.0667382	0.134231	3.35115	9.0715	SOX2;AR;ERG
																Globus pallidus, external segment	2/301	0.136603	0.212453	3.20711	6.38432	LEF1;GATA3										central layers of TG	3/301	0.0667382	0.134231	3.35115	9.0715	TCF7L2;LEF1;OTX2
																Gracile nucleus	2/301	0.136603	0.212453	3.20711	6.38432	POU5F1;KLF1										central nucleus of the inferior colliculus	3/301	0.0667382	0.134231	3.35115	9.0715	TCF7L2;SOX17;OTX2
																Granular lamina of the cochlear nuclei	2/301	0.136603	0.212453	3.20711	6.38432	OTX2;HNF1A										cerebellar vermis	3/301	0.0667382	0.134231	3.35115	9.0715	NEUROD1;MAX;FOXA2
																Gustatory areas, layer 4	2/301	0.136603	0.212453	3.20711	6.38432	HNF1A;POU5F1										collicular (rostral) midbrain tectum	3/301	0.0667382	0.134231	3.35115	9.0715	TCF7L2;LEF1;OTX2
																Hypoglossal nucleus	2/301	0.136603	0.212453	3.20711	6.38432	VDR;RUNX1										commissural pretectal domain	3/301	0.0667382	0.134231	3.35115	9.0715	TCF7L2;OTX2;SPDEF
																Inferior olivary complex	2/301	0.136603	0.212453	3.20711	6.38432	AR;NFE2L2										core of P-DMH	3/301	0.0667382	0.134231	3.35115	9.0715	SOX2;REST;ESR1
																Infralimbic area, layer 1	2/301	0.136603	0.212453	3.20711	6.38432	SOX17;VDR										deep white layer of SC	3/301	0.0667382	0.134231	3.35115	9.0715	TCF7L2;LEF1;OTX2
																Infralimbic area, layer 2	2/301	0.136603	0.212453	3.20711	6.38432	SOX17;HNF1A										dorsal juxtacommissural pretectal nucleus	3/301	0.0667382	0.134231	3.35115	9.0715	TCF7L2;OTX2;SPDEF
																Interpeduncular nucleus	2/301	0.136603	0.212453	3.20711	6.38432	FOXA1;VDR										dorsal part of THyB	3/301	0.0667382	0.134231	3.35115	9.0715	AR;STAT3;ESR1
																Interposed nucleus	2/301	0.136603	0.212453	3.20711	6.38432	NEUROD1;FOXA2										dorsal part of m1A	3/301	0.0667382	0.134231	3.35115	9.0715	TCF7L2;LEF1;OTX2
																Interstitial nucleus of Cajal	2/301	0.136603	0.212453	3.20711	6.38432	FOXA1;EBF3										dorsal part of m2A	3/301	0.0667382	0.134231	3.35115	9.0715	TCF7L2;LEF1;HOXB13
																Intralaminar nuclei of the dorsal thalamus	2/301	0.136603	0.212453	3.20711	6.38432	TCF7L2;LEF1										dorsal preisthmic part of periaqueductal gray	3/301	0.0667382	0.134231	3.35115	9.0715	TCF7L2;LEF1;HOXB13
																JcP contribution to LTL	2/301	0.136603	0.212453	3.20711	6.38432	TCF7L2;MNT										dorsal tuberomammillary nucleus, intermediate part (histaminergic)	3/301	0.0667382	0.134231	3.35115	9.0715	SOX2;REST;EBF3
																JcPV part of the periaqueductal gray	2/301	0.136603	0.212453	3.20711	6.38432	TCF7L2;OTX2										dorsolateral SC part of the periaqueductal gray	3/301	0.0667382	0.134231	3.35115	9.0715	TCF7L2;LEF1;OTX2
																Lateral posterior nucleus of the thalamus	2/301	0.136603	0.212453	3.20711	6.38432	TCF7L2;LEF1										dorsolateral TG part of the periaqueductal gray	3/301	0.0667382	0.134231	3.35115	9.0715	TCF7L2;LEF1;OTX2
																Lateral reticular nucleus, parvicellular part	2/301	0.136603	0.212453	3.20711	6.38432	NR2F6;NFE2L2										dorsolateral isthmic part of the dorsal raphe nucleus	3/301	0.0667382	0.134231	3.35115	9.0715	FOXA1;GATA3;ESR1
																Lateral visual area, layer 6b	2/301	0.136603	0.212453	3.20711	6.38432	PBX2;NR3C1										dorsolateral part of Lat	3/301	0.0667382	0.134231	3.35115	9.0715	NEUROD1;NFE2;MAX
																Lobule II	2/301	0.136603	0.212453	3.20711	6.38432	NEUROD1;FOXA2										dorsolateral part of m2A	3/301	0.0667382	0.134231	3.35115	9.0715	NEUROD1;TCF7L2;GATA4
																Lobule II, granular layer	2/301	0.136603	0.212453	3.20711	6.38432	NEUROD1;FOXA2										dorsolateral preisthmic part of periaqueductal gray	3/301	0.0667382	0.134231	3.35115	9.0715	TCF7L2;EBF3;ESR1
																Lobule II, molecular layer	2/301	0.136603	0.212453	3.20711	6.38432	NEUROD1;FOXA2										dorsomedial preoptic area, intermediate part	3/301	0.0667382	0.134231	3.35115	9.0715	AR;ERG;ESR1
																Lobules IV-V	2/301	0.136603	0.212453	3.20711	6.38432	NEUROD1;MAX										ethmoid nucleus	3/301	0.0667382	0.134231	3.35115	9.0715	TCF7L2;LEF1;NR3C1
																Lobules IV-V, granular layer	2/301	0.136603	0.212453	3.20711	6.38432	NEUROD1;MAX										external cortical nucleus of inferior colliculus	3/301	0.0667382	0.134231	3.35115	9.0715	NEUROD1;TCF7L2;SOX17
																Lobules IV-V, molecular layer	2/301	0.136603	0.212453	3.20711	6.38432	NEUROD1;MAX										external part of AOV	3/301	0.0667382	0.134231	3.35115	9.0715	EOMES;MITF;GATA2
																Magnocellular reticular nucleus	2/301	0.136603	0.212453	3.20711	6.38432	AR;NFE2L2										forebrain	3/301	0.0667382	0.134231	3.35115	9.0715	EOMES;EGR3;ETV5
																Medial amygdalar nucleus, anteroventral part	2/301	0.136603	0.212453	3.20711	6.38432	SOX17;FLI1										intercalate nucleus	3/301	0.0667382	0.134231	3.35115	9.0715	TCF7L2;LEF1;NR2F1
																Medial amygdalar nucleus, posteroventral part	2/301	0.136603	0.212453	3.20711	6.38432	ESR1;SPDEF										intermediate part of PHyB	3/301	0.0667382	0.134231	3.35115	9.0715	SMAD2;NFIL3;ESR1
																Medial group of the dorsal thalamus	2/301	0.136603	0.212453	3.20711	6.38432	TCF7L2;LEF1										intermediate part of THyB	3/301	0.0667382	0.134231	3.35115	9.0715	AR;STAT3;ESR1
																Medial preoptic area	2/301	0.136603	0.212453	3.20711	6.38432	AR;ESR1										intermediate part of isB	3/301	0.0667382	0.134231	3.35115	9.0715	FOXA1;KLF1;FOXA2
																Median preoptic nucleus	2/301	0.136603	0.212453	3.20711	6.38432	KLF4;ESR1										intermediate part of r1B	3/301	0.0667382	0.134231	3.35115	9.0715	FOXA1;SPDEF;KLF1
																Mediodorsal nucleus of the thalamus, medial part	2/301	0.136603	0.212453	3.20711	6.38432	TCF7L2;LEF1										intermediate periretromammillary nucleus	3/301	0.0667382	0.134231	3.35115	9.0715	FOXA1;EBF3;ERG
																Medullary reticular nucleus, dorsal part	2/301	0.136603	0.212453	3.20711	6.38432	AR;MYC										intermediate stratum of 5BL	3/301	0.0667382	0.134231	3.35115	9.0715	MYC;HOXB13;KLF1
																Nodulus (X)	2/301	0.136603	0.212453	3.20711	6.38432	NEUROD1;OTX2										intermediate stratum of AStr	3/301	0.0667382	0.134231	3.35115	9.0715	AR;KLF5;OTX2
																Nodulus (X), granular layer	2/301	0.136603	0.212453	3.20711	6.38432	NEUROD1;OTX2										intermediate stratum of DgSe	3/301	0.0667382	0.134231	3.35115	9.0715	SOX2;MNT;ERG
																Nucleus of Roller	2/301	0.136603	0.212453	3.20711	6.38432	OTX2;RUNX1										intermediate stratum of IC	3/301	0.0667382	0.134231	3.35115	9.0715	TCF7L2;SOX17;OTX2
																Nucleus of the brachium of the inferior colliculus	2/301	0.136603	0.212453	3.20711	6.38432	TCF7L2;GATA3										intermediate stratum of ITTh	3/301	0.0667382	0.134231	3.35115	9.0715	TCF7L2;LEF1;NR3C1
																Nucleus of the lateral lemniscus	2/301	0.136603	0.212453	3.20711	6.38432	GATA4;GATA3										intermediate stratum of PHyB-I	3/301	0.0667382	0.134231	3.35115	9.0715	SMAD2;AR;ESR1
																Nucleus of the lateral lemniscus, horizontal part	2/301	0.136603	0.212453	3.20711	6.38432	GATA4;SPDEF										intermediate stratum of PHyB-P	3/301	0.0667382	0.134231	3.35115	9.0715	FOXA1;EBF3;ERG
																Nucleus of the optic tract	2/301	0.136603	0.212453	3.20711	6.38432	TCF7L2;MNT										intermediate stratum of PHyB-V	3/301	0.0667382	0.134231	3.35115	9.0715	SOX2;REST;EBF3
																Nucleus of the posterior commissure	2/301	0.136603	0.212453	3.20711	6.38432	TCF7L2;POU5F1										intermediate stratum of RMa	3/301	0.0667382	0.134231	3.35115	9.0715	FOXA1;SMAD2;NFIL3
																Nucleus of the solitary tract	2/301	0.136603	0.212453	3.20711	6.38432	AR;KLF1										intermediate stratum of RtC	3/301	0.0667382	0.134231	3.35115	9.0715	TCF7L2;LEF1;NR2F1
																Nucleus of the solitary tract, lateral part	2/301	0.136603	0.212453	3.20711	6.38432	AR;KLF1										intermediate stratum of SC	3/301	0.0667382	0.134231	3.35115	9.0715	TCF7L2;LEF1;OTX2
																Nucleus of the solitary tract, medial part	2/301	0.136603	0.212453	3.20711	6.38432	AR;KLF1										intermediate stratum of TG	3/301	0.0667382	0.134231	3.35115	9.0715	TCF7L2;LEF1;OTX2
																Nucleus y	2/301	0.136603	0.212453	3.20711	6.38432	SOX17;OTX2										intermediate stratum of THyB-D	3/301	0.0667382	0.134231	3.35115	9.0715	AR;STAT3;ESR1
																Orbital area	2/301	0.136603	0.212453	3.20711	6.38432	EOMES;SOX17										intermediate stratum of THyB-I	3/301	0.0667382	0.134231	3.35115	9.0715	AR;STAT3;ESR1
																Orbital area, medial part, layer 2	2/301	0.136603	0.212453	3.20711	6.38432	SOX17;HNF1A										intermediate stratum of THyB-P	3/301	0.0667382	0.134231	3.35115	9.0715	FOXA1;AR;NFIL3
																Pallidum	2/301	0.136603	0.212453	3.20711	6.38432	GATA3;ESR1										intermediate stratum of ZIC	3/301	0.0667382	0.134231	3.35115	9.0715	TCF7L2;HNF4G;EBF3
																Pallidum, caudal region	2/301	0.136603	0.212453	3.20711	6.38432	AR;ESR1										intermediate stratum of isBI	3/301	0.0667382	0.134231	3.35115	9.0715	FOXA1;KLF1;FOXA2
																Pallidum, dorsal region	2/301	0.136603	0.212453	3.20711	6.38432	LEF1;GATA3										intermediate stratum of m1AD	3/301	0.0667382	0.134231	3.35115	9.0715	TCF7L2;LEF1;OTX2
																Parabrachial nucleus, lateral division	2/301	0.136603	0.212453	3.20711	6.38432	NEUROD1;MAX										intermediate stratum of m2AL	3/301	0.0667382	0.134231	3.35115	9.0715	TCF7L2;WT1;GATA4
																Parabrachial nucleus, lateral division, dorsal lateral part	2/301	0.136603	0.212453	3.20711	6.38432	NEUROD1;MAX										intermediate stratum of p1B	3/301	0.0667382	0.134231	3.35115	9.0715	FOXA1;EBF3;FOXA2
																Parabrachial nucleus, medial division, external medial part	2/301	0.136603	0.212453	3.20711	6.38432	NEUROD1;ESR1										intermediate stratum of p2ZL	3/301	0.0667382	0.134231	3.35115	9.0715	TCF7L2;LEF1;NR2F1
																Paragigantocellular reticular nucleus, dorsal part	2/301	0.136603	0.212453	3.20711	6.38432	NR2F6;RUNX1										intermediate stratum of p3ZL	3/301	0.0667382	0.134231	3.35115	9.0715	TCF7L2;LEF1;NR2F1
																Paragigantocellular reticular nucleus, lateral part	2/301	0.136603	0.212453	3.20711	6.38432	AR;NFE2L2										intermediate stratum of r1BI	3/301	0.0667382	0.134231	3.35115	9.0715	FOXA1;SPDEF;KLF1
																Parastrial nucleus	2/301	0.136603	0.212453	3.20711	6.38432	AR;ESR1										intermediate stratum of r4BM	3/301	0.0667382	0.134231	3.35115	9.0715	ELF4;MYC;HOXB13
																Parasubiculum, layer 2	2/301	0.136603	0.212453	3.20711	6.38432	NFE2;POU5F1										intermediate stratum of r4Ve	3/301	0.0667382	0.134231	3.35115	9.0715	GATA1;PHOX2B;KLF1
																Paraventricular hypothalamic nucleus	2/301	0.136603	0.212453	3.20711	6.38432	SOX2;ESR1										intermediate stratum of r5BI	3/301	0.0667382	0.134231	3.35115	9.0715	ELF4;SOX13;KLF1
																Paraventricular hypothalamic nucleus, magnocellular division	2/301	0.136603	0.212453	3.20711	6.38432	ERG;ESR1										intermediate stratum of r5BM	3/301	0.0667382	0.134231	3.35115	9.0715	ELF4;MYC;HOXB13
																Paraventricular hypothalamic nucleus, magnocellular division, medial magnocellular part	2/301	0.136603	0.212453	3.20711	6.38432	ERG;ESR1										intermediate stratum of r5Tr	3/301	0.0667382	0.134231	3.35115	9.0715	CDX2;STAT3;PHOX2B
																Paraventricular hypothalamic nucleus, magnocellular division, posterior magnocellular part	2/301	0.136603	0.212453	3.20711	6.38432	ERG;ESR1										intermediate stratum of r5Ve	3/301	0.0667382	0.134231	3.35115	9.0715	GATA1;PHOX2B;KLF1
																Paraventricular hypothalamic nucleus, magnocellular division, posterior magnocellular part, lateral zone	2/301	0.136603	0.212453	3.20711	6.38432	ERG;ESR1										intermediate stratum of r6BI	3/301	0.0667382	0.134231	3.35115	9.0715	ELF4;WT1;SOX13
																Paraventricular hypothalamic nucleus, parvicellular division	2/301	0.136603	0.212453	3.20711	6.38432	SOX2;ESR1										intermediate stratum of r6BL	3/301	0.0667382	0.134231	3.35115	9.0715	ELF4;HNF1A;KLF1
																Paraventricular hypothalamic nucleus, parvicellular division, anterior parvicellular part	2/301	0.136603	0.212453	3.20711	6.38432	SOX2;ESR1										intermediate stratum of r6BM	3/301	0.0667382	0.134231	3.35115	9.0715	ELF4;HOXB13;RUNX1
																Periaqueductal gray	2/301	0.136603	0.212453	3.20711	6.38432	TCF7L2;EBF3										intermediate stratum of r6Tr	3/301	0.0667382	0.134231	3.35115	9.0715	CDX2;STAT3;PHOX2B
																Perihypoglossal nuclei	2/301	0.136603	0.212453	3.20711	6.38432	OTX2;RUNX1										intermediate stratum of r6Ve	3/301	0.0667382	0.134231	3.35115	9.0715	GATA1;PHOX2B;KLF1
																Periventricular hypothalamic nucleus, posterior part	2/301	0.136603	0.212453	3.20711	6.38432	ESR1;NR2F6										intermediate stratum of r7BL	3/301	0.0667382	0.134231	3.35115	9.0715	FOXA3;KLF1;NFE2L2
																Periventricular region	2/301	0.136603	0.212453	3.20711	6.38432	AR;ESR1										intermediate stratum of r8BM	3/301	0.0667382	0.134231	3.35115	9.0715	ELF4;RUNX1;NFE2L2
																Pons, behavioral state related	2/301	0.136603	0.212453	3.20711	6.38432	GATA3;KLF1										intermediate stratum of r8Tr	3/301	0.0667382	0.134231	3.35115	9.0715	MYC;KLF1;NFE2L2
																Pons, motor related	2/301	0.136603	0.212453	3.20711	6.38432	MYC;HOXB13										intermediate stratum of r9BL	3/301	0.0667382	0.134231	3.35115	9.0715	MYC;KLF1;NFE2L2
																Pontine reticular nucleus	2/301	0.136603	0.212453	3.20711	6.38432	KLF1;NR2F6										intermediate stratum of r9Ve	3/301	0.0667382	0.134231	3.35115	9.0715	EBF3;PHOX2B;SPDEF
																Posterior hypothalamic nucleus	2/301	0.136603	0.212453	3.20711	6.38432	FOXA1;EBF3										intermediate stratum of the VAP	3/301	0.0667382	0.134231	3.35115	9.0715	NR2F1;HNF1B;ESR1
																Posterior limiting nucleus of the thalamus	2/301	0.136603	0.212453	3.20711	6.38432	TCF7L2;GATA3										intermediate white layer of SC	3/301	0.0667382	0.134231	3.35115	9.0715	TCF7L2;LEF1;OTX2
																Posterior parietal association areas, layer 5	2/301	0.136603	0.212453	3.20711	6.38432	BHLHE40;ERG										intermedioposterior nucleus	3/301	0.0667382	0.134231	3.35115	9.0715	TCF7L2;LEF1;NR3C1
																Primary somatosensory area, lower limb, layer 6a	2/301	0.136603	0.212453	3.20711	6.38432	MNT;BHLHE40										interstitial nucleus of the zona limitans	3/301	0.0667382	0.134231	3.35115	9.0715	TCF7L2;LEF1;NR2F1
																Primary somatosensory area, lower limb, layer 6b	2/301	0.136603	0.212453	3.20711	6.38432	MNT;NR3C1										isthmic part of the periaqueductal gray	3/301	0.0667382	0.134231	3.35115	9.0715	HNF4G;HNF1A;HOXB13
																Primary somatosensory area, nose	2/301	0.136603	0.212453	3.20711	6.38432	GATA2;RUNX1										isthmus	3/301	0.0667382	0.134231	3.35115	9.0715	NEUROD1;MAX;FOXA2
																Primary somatosensory area, nose, layer 5	2/301	0.136603	0.212453	3.20711	6.38432	GATA2;RUNX1										isthmus proper	3/301	0.0667382	0.134231	3.35115	9.0715	NEUROD1;GATA4;HNF1A
																Primary somatosensory area, trunk, layer 6b	2/301	0.136603	0.212453	3.20711	6.38432	BHLHE40;NR3C1										lateral (dentate) cerebellar nucleus	3/301	0.0667382	0.134231	3.35115	9.0715	NEUROD1;NFE2;MAX
																Primary somatosensory area, unassigned, layer 6b	2/301	0.136603	0.212453	3.20711	6.38432	FLI1;POU5F1										lateral IC periaqueductal gray	3/301	0.0667382	0.134231	3.35115	9.0715	TCF7L2;EBF3;HOXB13
																Purkinje cell layer of CbVCx	2/301	0.136603	0.212453	3.20711	6.38432	NEUROD1;FOXA2										lateral part of CoP	3/301	0.0667382	0.134231	3.35115	9.0715	TCF7L2;OTX2;SPDEF
																Retrosplenial area	2/301	0.136603	0.212453	3.20711	6.38432	HNF1A;ERG										lateral part of alar m1	3/301	0.0667382	0.134231	3.35115	9.0715	TCF7L2;EBF3;GATA4
																Retrosplenial area, dorsal part, layer 6a	2/301	0.136603	0.212453	3.20711	6.38432	SOX17;BHLHE40										lateral part of alar p3	3/301	0.0667382	0.134231	3.35115	9.0715	TCF7L2;LEF1;NR2F1
																Retrosplenial area, lateral agranular part, layer 5	2/301	0.136603	0.212453	3.20711	6.38432	SOX17;BHLHE40										lateral part of m2A	3/301	0.0667382	0.134231	3.35115	9.0715	TCF7L2;WT1;EBF3
																Retrosplenial area, ventral part	2/301	0.136603	0.212453	3.20711	6.38432	HNF1A;ERG										lateral part of preisthmic periaqueductal gray	3/301	0.0667382	0.134231	3.35115	9.0715	TCF7L2;EBF3;ESR1
																Retrosplenial area, ventral part, layer 1	2/301	0.136603	0.212453	3.20711	6.38432	HNF1A;ERG										lateral part of r7B	3/301	0.0667382	0.134231	3.35115	9.0715	FOXA3;KLF1;NFE2L2
																Retrosplenial area, ventral part, layer 2/3	2/301	0.136603	0.212453	3.20711	6.38432	HNF1A;ERG										lateral part of r8B	3/301	0.0667382	0.134231	3.35115	9.0715	MYC;KLF1;NFE2L2
																Retrosplenial area, ventral part, layer 5	2/301	0.136603	0.212453	3.20711	6.38432	HNF1A;ERG										lateral part of r9B	3/301	0.0667382	0.134231	3.35115	9.0715	MYC;KLF1;NFE2L2
																Retrosplenial area, ventral part, layer 6a	2/301	0.136603	0.212453	3.20711	6.38432	TCF4;ETV5										lateral periretromammillary nucleus	3/301	0.0667382	0.134231	3.35115	9.0715	FOXA1;SMAD2;NFIL3
																Septohippocampal nucleus	2/301	0.136603	0.212453	3.20711	6.38432	SOX2;VDR										lateral septal nucleus, intermedio-ventral part	3/301	0.0667382	0.134231	3.35115	9.0715	SOX2;MNT;ERG
																Spinal nucleus of the trigeminal, caudal part	2/301	0.136603	0.212453	3.20711	6.38432	EBF3;NFE2L2										lateral spiriform nucleus	3/301	0.0667382	0.134231	3.35115	9.0715	TCF7L2;ERG;SPDEF
																Spinal nucleus of the trigeminal, oral part	2/301	0.136603	0.212453	3.20711	6.38432	AR;GATA3										laterodorsal nucleus	3/301	0.0667382	0.134231	3.35115	9.0715	TCF7L2;LEF1;OTX2
																Spinal nucleus of the trigeminal, oral part, ventrolateral part	2/301	0.136603	0.212453	3.20711	6.38432	AR;GATA3										layer 1 of CCx	3/301	0.0667382	0.134231	3.35115	9.0715	SOX17;HNF4G;HNF1A
																Spinal vestibular nucleus	2/301	0.136603	0.212453	3.20711	6.38432	OTX2;HNF1A										layer 1 of RSC	3/301	0.0667382	0.134231	3.35115	9.0715	KLF5;BHLHE40;NR3C1
																Subiculum, dorsal part, molecular layer	2/301	0.136603	0.212453	3.20711	6.38432	BHLHE40;TCF4										layer 2 of CCx	3/301	0.0667382	0.134231	3.35115	9.0715	SOX17;HNF4G;HNF1A
																Subiculum, ventral part	2/301	0.136603	0.212453	3.20711	6.38432	AR;GATA3										layer 2 of FCx	3/301	0.0667382	0.134231	3.35115	9.0715	EOMES;PRDM1;GATA1
																Subiculum, ventral part, molecular layer	2/301	0.136603	0.212453	3.20711	6.38432	AR;GATA3										layer 4 of PaS	3/301	0.0667382	0.134231	3.35115	9.0715	KLF5;TCF4;NR3C1
																Substantia nigra, compact part	2/301	0.136603	0.212453	3.20711	6.38432	FOXA1;FOXA2										layer 4 of RSC	3/301	0.0667382	0.134231	3.35115	9.0715	KLF5;BHLHE40;NR3C1
																Superior central nucleus raphe, lateral part	2/301	0.136603	0.212453	3.20711	6.38432	GATA3;RUNX1										layer 5 of RSC	3/301	0.0667382	0.134231	3.35115	9.0715	KLF5;ERF;NR3C1
																Superior colliculus, optic layer	2/301	0.136603	0.212453	3.20711	6.38432	LEF1;OTX2										liminal alar domain of m1	3/301	0.0667382	0.134231	3.35115	9.0715	TCF7L2;EBF3;HOXB13
																Superior olivary complex	2/301	0.136603	0.212453	3.20711	6.38432	AR;MYC										liminal nucleus	3/301	0.0667382	0.134231	3.35115	9.0715	TCF7L2;LEF1;EBF3
																Superior olivary complex, medial part	2/301	0.136603	0.212453	3.20711	6.38432	AR;MYC										liminal part of alar isthmus	3/301	0.0667382	0.134231	3.35115	9.0715	EBF3;GATA4;SPDEF
																Superior olivary complex, periolivary region	2/301	0.136603	0.212453	3.20711	6.38432	AR;MYC										m1Lim (VL) part of the periaqueductal gray	3/301	0.0667382	0.134231	3.35115	9.0715	TCF7L2;EBF3;HOXB13
																Taenia tecta, ventral part	2/301	0.136603	0.212453	3.20711	6.38432	EOMES;SOX17										m2 basal plate	3/301	0.0667382	0.134231	3.35115	9.0715	FOXA1;EBF3;FOXA2
																Thalamus, polymodal association cortex related	2/301	0.136603	0.212453	3.20711	6.38432	TCF7L2;LEF1										magnocellular (medial) subparafascicular nucleus	3/301	0.0667382	0.134231	3.35115	9.0715	TCF7L2;LEF1;EBF3
																Ventral cochlear nucleus	2/301	0.136603	0.212453	3.20711	6.38432	NFE2;GATA3										mantle zone of AOB	3/301	0.0667382	0.134231	3.35115	9.0715	EOMES;PRDM1;GATA1
																Ventral medial nucleus of the thalamus	2/301	0.136603	0.212453	3.20711	6.38432	TCF7L2;LEF1										mantle zone of APal	3/301	0.0667382	0.134231	3.35115	9.0715	KLF5;SOX13;OTX2
																Ventral tegmental area	2/301	0.136603	0.212453	3.20711	6.38432	FOXA1;EBF3										mantle zone of AStr	3/301	0.0667382	0.134231	3.35115	9.0715	AR;KLF5;OTX2
																Ventromedial hypothalamic nucleus, anterior part	2/301	0.136603	0.212453	3.20711	6.38432	AR;ESR1										mantle zone of CoPL	3/301	0.0667382	0.134231	3.35115	9.0715	TCF7L2;OTX2;SPDEF
																Ventromedial hypothalamic nucleus, dorsomedial part	2/301	0.136603	0.212453	3.20711	6.38432	GATA2;ESR1										mantle zone of Ist	3/301	0.0667382	0.134231	3.35115	9.0715	NEUROD1;GATA4;HNF1A
																alar plate of p1	2/301	0.136603	0.212453	3.20711	6.38432	TCF7L2;SPDEF										mantle zone of PHyB-I	3/301	0.0667382	0.134231	3.35115	9.0715	SMAD2;NFIL3;ESR1
																alar plate of p2 (alar thalamus)	2/301	0.136603	0.212453	3.20711	6.38432	TCF7L2;LEF1										mantle zone of RtC	3/301	0.0667382	0.134231	3.35115	9.0715	TCF7L2;LEF1;NR2F1
																amygdalo-striatal transition	2/301	0.136603	0.212453	3.20711	6.38432	AR;OTX2										mantle zone of S	3/301	0.0667382	0.134231	3.35115	9.0715	AR;BHLHE40;NR3C1
																anterior olfactory area, dorsal part	2/301	0.136603	0.212453	3.20711	6.38432	SOX17;HNF1A										mantle zone of TG	3/301	0.0667382	0.134231	3.35115	9.0715	TCF7L2;LEF1;OTX2
																anteroventral part of alar thalamus	2/301	0.136603	0.212453	3.20711	6.38432	TCF7L2;LEF1										mantle zone of THyB-D	3/301	0.0667382	0.134231	3.35115	9.0715	AR;STAT3;ESR1
																basal part of terminal hypothalamus	2/301	0.136603	0.212453	3.20711	6.38432	AR;ESR1										mantle zone of THyB-I	3/301	0.0667382	0.134231	3.35115	9.0715	AR;STAT3;ESR1
																basal plate of m1	2/301	0.136603	0.212453	3.20711	6.38432	FOXA1;FOXA2										mantle zone of THyB-P	3/301	0.0667382	0.134231	3.35115	9.0715	SMAD2;AR;NFIL3
																basal plate of p3	2/301	0.136603	0.212453	3.20711	6.38432	FOXA1;EBF3										mantle zone of ZIC	3/301	0.0667382	0.134231	3.35115	9.0715	TCF7L2;HNF4G;EBF3
																central part of VMH	2/301	0.136603	0.212453	3.20711	6.38432	AR;ESR1										mantle zone of cerebellar vermis	3/301	0.0667382	0.134231	3.35115	9.0715	NEUROD1;MAX;FOXA2
																colliculus superior	2/301	0.136603	0.212453	3.20711	6.38432	LEF1;OTX2										mantle zone of isBI	3/301	0.0667382	0.134231	3.35115	9.0715	FOXA1;KLF1;FOXA2
																core of P-DMH	2/301	0.136603	0.212453	3.20711	6.38432	SOX2;ESR1										mantle zone of isLim	3/301	0.0667382	0.134231	3.35115	9.0715	EBF3;GATA4;SPDEF
																core of T-DMH	2/301	0.136603	0.212453	3.20711	6.38432	AR;ESR1										mantle zone of m1AD	3/301	0.0667382	0.134231	3.35115	9.0715	TCF7L2;LEF1;OTX2
																core part of DTg	2/301	0.136603	0.212453	3.20711	6.38432	SOX2;FOXA2										mantle zone of m1AL	3/301	0.0667382	0.134231	3.35115	9.0715	TCF7L2;EBF3;GATA4
																core part of the anterobasal nucleus	2/301	0.136603	0.212453	3.20711	6.38432	AR;ESR1										mantle zone of m1Lim	3/301	0.0667382	0.134231	3.35115	9.0715	TCF7L2;EBF3;HOXB13
																cortex of cerebellar vermis	2/301	0.136603	0.212453	3.20711	6.38432	NEUROD1;MAX										mantle zone of m2AD	3/301	0.0667382	0.134231	3.35115	9.0715	TCF7L2;LEF1;HOXB13
																diencephalon	2/301	0.136603	0.212453	3.20711	6.38432	TCF7L2;LEF1										mantle zone of m2ADL	3/301	0.0667382	0.134231	3.35115	9.0715	NEUROD1;TCF7L2;GATA4
																dorsal lateral geniculate nucleus	2/301	0.136603	0.212453	3.20711	6.38432	TCF7L2;LEF1										mantle zone of m2AL	3/301	0.0667382	0.134231	3.35115	9.0715	TCF7L2;WT1;EBF3
																dorsal part of CoP	2/301	0.136603	0.212453	3.20711	6.38432	TCF7L2;SPDEF										mantle zone of m2B	3/301	0.0667382	0.134231	3.35115	9.0715	FOXA1;EBF3;FOXA2
																dorsal part of JcP	2/301	0.136603	0.212453	3.20711	6.38432	TCF7L2;SPDEF										mantle zone of p1B	3/301	0.0667382	0.134231	3.35115	9.0715	FOXA1;EBF3;FOXA2
																dorsal part of THyB	2/301	0.136603	0.212453	3.20711	6.38432	AR;ESR1										mantle zone of p2ZL	3/301	0.0667382	0.134231	3.35115	9.0715	TCF7L2;LEF1;NR2F1
																dorsal septopreoptic nucleus	2/301	0.136603	0.212453	3.20711	6.38432	AR;ESR1										mantle zone of p3B	3/301	0.0667382	0.134231	3.35115	9.0715	FOXA1;NFIL3;EBF3
																dorsal spiriform nucleus	2/301	0.136603	0.212453	3.20711	6.38432	TCF7L2;SPDEF										mantle zone of p3ZL	3/301	0.0667382	0.134231	3.35115	9.0715	TCF7L2;LEF1;NR2F1
																dorsal subnucleus of MG	2/301	0.136603	0.212453	3.20711	6.38432	TCF7L2;LEF1										mantle zone of r10Tr	3/301	0.0667382	0.134231	3.35115	9.0715	EBF3;PHOX2B;NFE2L2
																dorsal terminal nucleus of the accessory optic tract	2/301	0.136603	0.212453	3.20711	6.38432	TCF7L2;MNT										mantle zone of r1BI	3/301	0.0667382	0.134231	3.35115	9.0715	FOXA1;SPDEF;KLF1
																dorsal tier of thalamus	2/301	0.136603	0.212453	3.20711	6.38432	TCF7L2;LEF1										mantle zone of r3Ve	3/301	0.0667382	0.134231	3.35115	9.0715	HNF1A;GATA1;PHOX2B
																dorsal tuberomammillary nucleus, intermediate part (histaminergic)	2/301	0.136603	0.212453	3.20711	6.38432	SOX2;EBF3										mantle zone of r4BM	3/301	0.0667382	0.134231	3.35115	9.0715	ELF4;MYC;HOXB13
																dorsolateral (non-cerebellar) part of isA	2/301	0.136603	0.212453	3.20711	6.38432	NEUROD1;EBF3										mantle zone of r4Ve	3/301	0.0667382	0.134231	3.35115	9.0715	HNF1A;GATA1;PHOX2B
																dorsolateral IC periaqueductal gray	2/301	0.136603	0.212453	3.20711	6.38432	TCF7L2;LEF1										mantle zone of r5BM	3/301	0.0667382	0.134231	3.35115	9.0715	ELF4;MYC;HOXB13
																dorsomedial nucleus, terminal part	2/301	0.136603	0.212453	3.20711	6.38432	AR;ESR1										mantle zone of r5Tr	3/301	0.0667382	0.134231	3.35115	9.0715	CDX2;STAT3;PHOX2B
																external part of AOV	2/301	0.136603	0.212453	3.20711	6.38432	EOMES;GATA2										mantle zone of r6BM	3/301	0.0667382	0.134231	3.35115	9.0715	ELF4;HOXB13;RUNX1
																first (dorsal) preoptic domain	2/301	0.136603	0.212453	3.20711	6.38432	AR;ESR1										mantle zone of r6Ve	3/301	0.0667382	0.134231	3.35115	9.0715	OTX2;PHOX2B;KLF1
																forebrain	2/301	0.136603	0.212453	3.20711	6.38432	EOMES;ETV5										mantle zone of r7BL	3/301	0.0667382	0.134231	3.35115	9.0715	FOXA3;KLF1;NFE2L2
																hippocampus (cortex Ammonis)	2/301	0.136603	0.212453	3.20711	6.38432	AR;TCF4										mantle zone of r7Tr	3/301	0.0667382	0.134231	3.35115	9.0715	CDX2;MYC;PHOX2B
																insular cortex	2/301	0.136603	0.212453	3.20711	6.38432	HNF1A;FLI1										mantle zone of r8BL	3/301	0.0667382	0.134231	3.35115	9.0715	MYC;KLF1;NFE2L2
																interanterodorsal nucleus	2/301	0.136603	0.212453	3.20711	6.38432	TCF7L2;LEF1										mantle zone of r8BM	3/301	0.0667382	0.134231	3.35115	9.0715	ELF4;RUNX1;NFE2L2
																intergeniculate leaflet	2/301	0.136603	0.212453	3.20711	6.38432	TCF7L2;LEF1										mantle zone of r9BL	3/301	0.0667382	0.134231	3.35115	9.0715	MYC;KLF1;NFE2L2
																intermediate gray layer of SC	2/301	0.136603	0.212453	3.20711	6.38432	LEF1;OTX2										mantle zone of r9Ve	3/301	0.0667382	0.134231	3.35115	9.0715	EBF3;PHOX2B;KLF1
																intermediate isthmic part of the dorsal raphe nucleus	2/301	0.136603	0.212453	3.20711	6.38432	GATA3;RUNX1										mantle zone of the PBC	3/301	0.0667382	0.134231	3.35115	9.0715	NEUROD1;EBF3;ESR1
																intermediate part of THyB	2/301	0.136603	0.212453	3.20711	6.38432	AR;ESR1										medial amygdala, anteroventral part	3/301	0.0667382	0.134231	3.35115	9.0715	NR2F1;HNF1B;FLI1
																intermediate part of r4B	2/301	0.136603	0.212453	3.20711	6.38432	HOXB13;KLF1										medial part of MPO	3/301	0.0667382	0.134231	3.35115	9.0715	AR;ERG;ESR1
																intermediate stratum of AOB	2/301	0.136603	0.212453	3.20711	6.38432	EOMES;HNF1A										medial part of r4B	3/301	0.0667382	0.134231	3.35115	9.0715	ELF4;MYC;HOXB13
																intermediate stratum of AStr	2/301	0.136603	0.212453	3.20711	6.38432	AR;OTX2										medial part of r5B	3/301	0.0667382	0.134231	3.35115	9.0715	ELF4;MYC;HOXB13
																intermediate stratum of CoPD	2/301	0.136603	0.212453	3.20711	6.38432	TCF7L2;SPDEF										medial part of r6B	3/301	0.0667382	0.134231	3.35115	9.0715	ELF4;HOXB13;RUNX1
																intermediate stratum of DTTh	2/301	0.136603	0.212453	3.20711	6.38432	TCF7L2;LEF1										medial part of r8B	3/301	0.0667382	0.134231	3.35115	9.0715	ELF4;RUNX1;NFE2L2
																intermediate stratum of JcPD	2/301	0.136603	0.212453	3.20711	6.38432	TCF7L2;SPDEF										mesomere 1	3/301	0.0667382	0.134231	3.35115	9.0715	TCF7L2;LEF1;OTX2
																intermediate stratum of PHyB-I	2/301	0.136603	0.212453	3.20711	6.38432	AR;ESR1										nucleus of the stria terminalis, medial division, anterior part	3/301	0.0667382	0.134231	3.35115	9.0715	SOX2;AR;ERG
																intermediate stratum of PHyB-V	2/301	0.136603	0.212453	3.20711	6.38432	SOX2;EBF3										p1B part of the periaqueductal gray	3/301	0.0667382	0.134231	3.35115	9.0715	FOXA1;EBF3;FOXA2
																intermediate stratum of PO1	2/301	0.136603	0.212453	3.20711	6.38432	AR;ESR1										p2 portion of the parabrachial pigmented nucleus	3/301	0.0667382	0.134231	3.35115	9.0715	FOXA1;EBF3;ERG
																intermediate stratum of THyB-D	2/301	0.136603	0.212453	3.20711	6.38432	AR;ESR1										p3 part of the ZL core	3/301	0.0667382	0.134231	3.35115	9.0715	TCF7L2;LEF1;NR2F1
																intermediate stratum of THyB-I	2/301	0.136603	0.212453	3.20711	6.38432	AR;ESR1										pallidal amygdala	3/301	0.0667382	0.134231	3.35115	9.0715	KLF5;SOX13;OTX2
																intermediate stratum of THyB-P	2/301	0.136603	0.212453	3.20711	6.38432	FOXA1;AR										pallium	3/301	0.0667382	0.134231	3.35115	9.0715	EOMES;EGR3;TCF4
																intermediate stratum of TPaA	2/301	0.136603	0.212453	3.20711	6.38432	ERG;ESR1										parabrachial complex	3/301	0.0667382	0.134231	3.35115	9.0715	NEUROD1;EBF3;ESR1
																intermediate stratum of VTTh	2/301	0.136603	0.212453	3.20711	6.38432	TCF7L2;LEF1										parabrachial part of the periaqueductal gray	3/301	0.0667382	0.134231	3.35115	9.0715	TCF7L2;EBF3;ESR1
																intermediate stratum of ZIC	2/301	0.136603	0.212453	3.20711	6.38432	TCF7L2;EBF3										paraterete nucleus	3/301	0.0667382	0.134231	3.35115	9.0715	SMAD2;SOX17;HOXB13
																intermediate stratum of isBL	2/301	0.136603	0.212453	3.20711	6.38432	EBF3;HNF1A										paraventricular nucleus, cap part	3/301	0.0667382	0.134231	3.35115	9.0715	TCF7L2;REST;ESR1
																intermediate stratum of isLim	2/301	0.136603	0.212453	3.20711	6.38432	GATA4;HNF1A										parvicellular interstitial nucleus of the posterior commissure	3/301	0.0667382	0.134231	3.35115	9.0715	TCF7L2;OTX2;SPDEF
																intermediate stratum of m1AL	2/301	0.136603	0.212453	3.20711	6.38432	TCF7L2;GATA4										parvocellular part of the r9LRt	3/301	0.0667382	0.134231	3.35115	9.0715	HNF4G;KLF1;NFE2L2
																intermediate stratum of m2ADL	2/301	0.136603	0.212453	3.20711	6.38432	TCF7L2;GATA4										peduncular (caudal) hypothalamus	3/301	0.0667382	0.134231	3.35115	9.0715	SMAD2;NFIL3;ESR1
																intermediate stratum of m2AL	2/301	0.136603	0.212453	3.20711	6.38432	TCF7L2;GATA4										peduncular nucleus of the stria medullaris	3/301	0.0667382	0.134231	3.35115	9.0715	LEF1;ERG;ESR1
																intermediate stratum of m2B	2/301	0.136603	0.212453	3.20711	6.38432	EBF3;FOXA2										peduncular part of dorsomedial hypothalamic nucleus	3/301	0.0667382	0.134231	3.35115	9.0715	SOX2;REST;ESR1
																intermediate stratum of r2Ve	2/301	0.136603	0.212453	3.20711	6.38432	SOX17;OTX2										perimammillary part of THyB	3/301	0.0667382	0.134231	3.35115	9.0715	SMAD2;AR;NFIL3
																intermediate stratum of r4BM	2/301	0.136603	0.212453	3.20711	6.38432	MYC;HOXB13										periventricular stratum of APal	3/301	0.0667382	0.134231	3.35115	9.0715	KLF5;SOX13;OTX2
																intermediate stratum of r5BM	2/301	0.136603	0.212453	3.20711	6.38432	MYC;HOXB13										periventricular stratum of AStr	3/301	0.0667382	0.134231	3.35115	9.0715	AR;KLF5;OTX2
																intermediate stratum of r6BL	2/301	0.136603	0.212453	3.20711	6.38432	HNF1A;KLF1										periventricular stratum of Dg	3/301	0.0667382	0.134231	3.35115	9.0715	AR;LEF1;ESR1
																intermediate stratum of r6BM	2/301	0.136603	0.212453	3.20711	6.38432	HOXB13;RUNX1										periventricular stratum of Ist	3/301	0.0667382	0.134231	3.35115	9.0715	HNF4G;HNF1A;HOXB13
																intermediate stratum of r7BL	2/301	0.136603	0.212453	3.20711	6.38432	KLF1;NFE2L2										periventricular stratum of JcPL	3/301	0.0667382	0.134231	3.35115	9.0715	TCF7L2;OTX2;SPDEF
																intermediate stratum of r7Tr	2/301	0.136603	0.212453	3.20711	6.38432	MYC;KLF1										periventricular stratum of PcPL	3/301	0.0667382	0.134231	3.35115	9.0715	TCF7L2;OTX2;SPDEF
																intermediate stratum of r8BM	2/301	0.136603	0.212453	3.20711	6.38432	RUNX1;NFE2L2										periventricular stratum of RtC	3/301	0.0667382	0.134231	3.35115	9.0715	SOX2;TCF7L2;REST
																intermediate stratum of r9Ve	2/301	0.136603	0.212453	3.20711	6.38432	EBF3;SPDEF										periventricular stratum of SC	3/301	0.0667382	0.134231	3.35115	9.0715	TCF7L2;LEF1;OTX2
																internal cortical nucleus of inferior colliculus	2/301	0.136603	0.212453	3.20711	6.38432	FOXA1;TCF7L2										periventricular stratum of SeDg	3/301	0.0667382	0.134231	3.35115	9.0715	SOX2;AR;ERG
																internal granular layer of CbVCx	2/301	0.136603	0.212453	3.20711	6.38432	NEUROD1;MAX										periventricular stratum of TG	3/301	0.0667382	0.134231	3.35115	9.0715	TCF7L2;LEF1;OTX2
																isthmic alar plate	2/301	0.136603	0.212453	3.20711	6.38432	NEUROD1;MAX										periventricular stratum of VTTh	3/301	0.0667382	0.134231	3.35115	9.0715	TCF7L2;LEF1;EBF3
																isthmic basal plate	2/301	0.136603	0.212453	3.20711	6.38432	FOXA1;EBF3										periventricular stratum of cerebellar vermis	3/301	0.0667382	0.134231	3.35115	9.0715	NEUROD1;MAX;FOXA2
																isthmic liminal part of the periaqueductal gray	2/301	0.136603	0.212453	3.20711	6.38432	EBF3;GATA3										periventricular stratum of m1Lim	3/301	0.0667382	0.134231	3.35115	9.0715	TCF7L2;EBF3;HOXB13
																isthmic part of basolateral isthmic reticular formation	2/301	0.136603	0.212453	3.20711	6.38432	EBF3;HNF1A										periventricular stratum of m2AD	3/301	0.0667382	0.134231	3.35115	9.0715	TCF7L2;LEF1;HOXB13
																isthmic part of the intermediate lateral lemniscal nucleus	2/301	0.136603	0.212453	3.20711	6.38432	NEUROD1;GATA4										periventricular stratum of m2ADL	3/301	0.0667382	0.134231	3.35115	9.0715	TCF7L2;EBF3;ESR1
																isthmic part of the periaqueductal gray	2/301	0.136603	0.212453	3.20711	6.38432	HNF1A;HOXB13										periventricular stratum of m2AL	3/301	0.0667382	0.134231	3.35115	9.0715	TCF7L2;EBF3;ESR1
																isthmic portion of paranigral nucleus	2/301	0.136603	0.212453	3.20711	6.38432	FOXA1;FOXA2										periventricular stratum of p1B	3/301	0.0667382	0.134231	3.35115	9.0715	FOXA1;EBF3;FOXA2
																isthmic roof plate	2/301	0.136603	0.212453	3.20711	6.38432	NEUROD1;FOXA2										periventricular stratum of p2Lim	3/301	0.0667382	0.134231	3.35115	9.0715	TCF7L2;LEF1;EBF3
																juxtacommissural pretectal domain	2/301	0.136603	0.212453	3.20711	6.38432	TCF7L2;SPDEF										periventricular stratum of r1Ve	3/301	0.0667382	0.134231	3.35115	9.0715	ELF1;SOX17;OTX2
																lateral pallium	2/301	0.136603	0.212453	3.20711	6.38432	EOMES;HNF1A										periventricular stratum of r2Co	3/301	0.0667382	0.134231	3.35115	9.0715	EOMES;NEUROD1;NFE2
																lateral part of JcP	2/301	0.136603	0.212453	3.20711	6.38432	TCF7L2;SPDEF										periventricular stratum of r5BM	3/301	0.0667382	0.134231	3.35115	9.0715	ELF4;SOX13;HNF1A
																lateral part of MPO	2/301	0.136603	0.212453	3.20711	6.38432	AR;ESR1										periventricular stratum of r6BM	3/301	0.0667382	0.134231	3.35115	9.0715	ELF4;FOXA3;RUNX1
																lateral part of PcP	2/301	0.136603	0.212453	3.20711	6.38432	TCF7L2;LEF1										periventricular stratum of r7Tr	3/301	0.0667382	0.134231	3.35115	9.0715	ELF4;MITF;KLF1
																lateral part of alar p2	2/301	0.136603	0.212453	3.20711	6.38432	TCF7L2;LEF1										periventricular stratum of the PBC	3/301	0.0667382	0.134231	3.35115	9.0715	TCF7L2;EBF3;ESR1
																lateral part of m2A	2/301	0.136603	0.212453	3.20711	6.38432	TCF7L2;EBF3										periventricular stratum of the VAP	3/301	0.0667382	0.134231	3.35115	9.0715	NR2F1;OTX2;ESR1
																lateral part of r5B	2/301	0.136603	0.212453	3.20711	6.38432	MYC;KLF1										pontine hindbrain	3/301	0.0667382	0.134231	3.35115	9.0715	ELF4;MYC;HOXB13
																lateral part of r7B	2/301	0.136603	0.212453	3.20711	6.38432	KLF1;NFE2L2										posterior (ventral) nucleus	3/301	0.0667382	0.134231	3.35115	9.0715	TCF7L2;LEF1;NR3C1
																lateral part of the isB	2/301	0.136603	0.212453	3.20711	6.38432	FOXA1;EBF3										posterior part of Int	3/301	0.0667382	0.134231	3.35115	9.0715	NEUROD1;ELF4;HNF1A
																lateral preoptic area, PO1 part	2/301	0.136603	0.212453	3.20711	6.38432	AR;ESR1										posteromedial cortical amygdaloid area	3/301	0.0667382	0.134231	3.35115	9.0715	ERF;NR2F1;FOXO1
																lateral subhabenular nucleus	2/301	0.136603	0.212453	3.20711	6.38432	TCF7L2;LEF1										posteromedial visual area, layer 1	3/301	0.0667382	0.134231	3.35115	9.0715	SMAD2;EGR3;SOX17
																lateral terminal nucleus of the accessory optic tract, lateral part	2/301	0.136603	0.212453	3.20711	6.38432	TCF7L2;MNT										posteromedial visual area, layer 2/3	3/301	0.0667382	0.134231	3.35115	9.0715	SOX17;BHLHE40;KLF4
																lateral tuberal nucleus	2/301	0.136603	0.212453	3.20711	6.38432	SOX17;HNF1A										posteromedial visual area, layer 4	3/301	0.0667382	0.134231	3.35115	9.0715	SOX17;BHLHE40;KLF4
																layer 1 of AOD cortex	2/301	0.136603	0.212453	3.20711	6.38432	SOX17;HNF1A										preisthmic tegmentum	3/301	0.0667382	0.134231	3.35115	9.0715	FOXA1;EBF3;FOXA2
																layer 1 of CCx	2/301	0.136603	0.212453	3.20711	6.38432	SOX17;HNF1A										prerubral area	3/301	0.0667382	0.134231	3.35115	9.0715	FOXA1;TCF7L2;EBF3
																layer 1 of RSC	2/301	0.136603	0.212453	3.20711	6.38432	BHLHE40;NR3C1										pretectal tegmentum	3/301	0.0667382	0.134231	3.35115	9.0715	FOXA1;EBF3;FOXA2
																layer 2 of CCx	2/301	0.136603	0.212453	3.20711	6.38432	SOX17;HNF1A										prethalamic (p3) zona limitans domain	3/301	0.0667382	0.134231	3.35115	9.0715	TCF7L2;LEF1;NR2F1
																layer 2 of PaS	2/301	0.136603	0.212453	3.20711	6.38432	TCF4;POU5F1										prethalamic tegmentum	3/301	0.0667382	0.134231	3.35115	9.0715	FOXA1;NFIL3;EBF3
																layer 3 of LOT	2/301	0.136603	0.212453	3.20711	6.38432	SOX2;FLI1										prethalamus	3/301	0.0667382	0.134231	3.35115	9.0715	TCF7L2;LEF1;NR2F1
																layer 4 of PaS	2/301	0.136603	0.212453	3.20711	6.38432	TCF4;NR3C1										principal pretectal nucleus	3/301	0.0667382	0.134231	3.35115	9.0715	TCF7L2;PBX2;SPDEF
																layer 4 of RSC	2/301	0.136603	0.212453	3.20711	6.38432	BHLHE40;NR3C1										prosomere 1	3/301	0.0667382	0.134231	3.35115	9.0715	FOXA1;TCF7L2;SPDEF
																layer 5 of RSC	2/301	0.136603	0.212453	3.20711	6.38432	ERF;NR3C1										prosomere 3	3/301	0.0667382	0.134231	3.35115	9.0715	TCF7L2;LEF1;NR2F1
																liminal alar domain of m2	2/301	0.136603	0.212453	3.20711	6.38432	GATA4;EBF3										pyramidal layer of S	3/301	0.0667382	0.134231	3.35115	9.0715	AR;BHLHE40;NR3C1
																liminal part of alar p1	2/301	0.136603	0.212453	3.20711	6.38432	TCF7L2;EBF3										r1 part of basointermediate reticular formation	3/301	0.0667382	0.134231	3.35115	9.0715	FOXA1;SPDEF;KLF1
																liminal periaqueductal gray of m2	2/301	0.136603	0.212453	3.20711	6.38432	TCF7L2;EBF3										r1 part of principal trigeminal sensory nucleus	3/301	0.0667382	0.134231	3.35115	9.0715	FLI1;PHOX2B;SPDEF
																lower basal lateral hypothalamic area	2/301	0.136603	0.212453	3.20711	6.38432	EBF3;HOXB13										r1 part of vestibular nucleus Y	3/301	0.0667382	0.134231	3.35115	9.0715	ELF1;SOX17;OTX2
																m1 (rostral) midbrain tegmentum	2/301	0.136603	0.212453	3.20711	6.38432	FOXA1;FOXA2										r10 part of nucleus gracilis	3/301	0.0667382	0.134231	3.35115	9.0715	ELF4;STAT3;PHOX2B
																m1 part of paranigral nucleus	2/301	0.136603	0.212453	3.20711	6.38432	FOXA1;FOXA2										r10 part of the trigeminal column	3/301	0.0667382	0.134231	3.35115	9.0715	EBF3;PHOX2B;NFE2L2
																m2 alar plate	2/301	0.136603	0.212453	3.20711	6.38432	TCF7L2;GATA4										r2 part of anteroventral cochlear nucleus	3/301	0.0667382	0.134231	3.35115	9.0715	NEUROD1;NFE2;OTX2
																m2 part of pararubral nucleus	2/301	0.136603	0.212453	3.20711	6.38432	FOXA1;FOXA2										r2 part of dorsal cochlear nucleus	3/301	0.0667382	0.134231	3.35115	9.0715	EOMES;NEUROD1;NFE2
																magnocellular diagonal band nucleus	2/301	0.136603	0.212453	3.20711	6.38432	SOX2;RUNX1										r3 part of anteroventral cochlear nucleus	3/301	0.0667382	0.134231	3.35115	9.0715	NFE2;OTX2;HNF1A
																mantle zone of AOD	2/301	0.136603	0.212453	3.20711	6.38432	SOX17;HNF1A										r3 part of basomedial reticular formation	3/301	0.0667382	0.134231	3.35115	9.0715	RARA;HOXB13;FOXA2
																mantle zone of AStr	2/301	0.136603	0.212453	3.20711	6.38432	AR;OTX2										r3 part of vestibular sensory column	3/301	0.0667382	0.134231	3.35115	9.0715	HNF1A;GATA1;PHOX2B
																mantle zone of CA	2/301	0.136603	0.212453	3.20711	6.38432	AR;TCF4										r3 roof plate	3/301	0.0667382	0.134231	3.35115	9.0715	FOXA1;PRDM1;KLF4
																mantle zone of CoPD	2/301	0.136603	0.212453	3.20711	6.38432	TCF7L2;SPDEF										r4 basal plate	3/301	0.0667382	0.134231	3.35115	9.0715	ELF4;MYC;HOXB13
																mantle zone of CoPV	2/301	0.136603	0.212453	3.20711	6.38432	TCF7L2;OTX2										r4 part of lateral vestibular nucleus	3/301	0.0667382	0.134231	3.35115	9.0715	HNF1A;GATA1;PHOX2B
																mantle zone of DTTh	2/301	0.136603	0.212453	3.20711	6.38432	TCF7L2;LEF1										r4 part of magnocellular medial vestibular nucleus	3/301	0.0667382	0.134231	3.35115	9.0715	GATA1;PHOX2B;KLF1
																mantle zone of InsCx	2/301	0.136603	0.212453	3.20711	6.38432	HNF1A;FLI1										r4 part of vestibular sensory column	3/301	0.0667382	0.134231	3.35115	9.0715	HNF1A;GATA1;PHOX2B
																mantle zone of JcPD	2/301	0.136603	0.212453	3.20711	6.38432	TCF7L2;SPDEF										r5 part of A5 noradrenergic cell group	3/301	0.0667382	0.134231	3.35115	9.0715	CDX2;STAT3;PHOX2B
																mantle zone of JcPL	2/301	0.136603	0.212453	3.20711	6.38432	TCF7L2;SPDEF										r5 part of basointermediate reticular formation	3/301	0.0667382	0.134231	3.35115	9.0715	ELF4;SOX13;KLF1
																mantle zone of PHyB-P	2/301	0.136603	0.212453	3.20711	6.38432	FOXA1;EBF3										r5 part of basolateral reticular formation	3/301	0.0667382	0.134231	3.35115	9.0715	MYC;HOXB13;KLF1
																mantle zone of PO1	2/301	0.136603	0.212453	3.20711	6.38432	AR;ESR1										r5 part of dorsal parvicellular reticular formation	3/301	0.0667382	0.134231	3.35115	9.0715	CDX2;STAT3;PHOX2B
																mantle zone of PO2	2/301	0.136603	0.212453	3.20711	6.38432	AR;ESR1										r5 part of magnocellular medial vestibular nucleus	3/301	0.0667382	0.134231	3.35115	9.0715	GATA1;PHOX2B;KLF1
																mantle zone of PaS	2/301	0.136603	0.212453	3.20711	6.38432	TCF4;POU5F1										r5 part of spinal vestibular nucleus	3/301	0.0667382	0.134231	3.35115	9.0715	OTX2;HNF1A;PHOX2B
																mantle zone of PcPL	2/301	0.136603	0.212453	3.20711	6.38432	TCF7L2;LEF1										r5 part of the trigeminal column	3/301	0.0667382	0.134231	3.35115	9.0715	CDX2;STAT3;PHOX2B
																mantle zone of SC	2/301	0.136603	0.212453	3.20711	6.38432	LEF1;OTX2										r6 part of basointermediate reticular formation	3/301	0.0667382	0.134231	3.35115	9.0715	ELF4;WT1;SOX13
																mantle zone of THyB-D	2/301	0.136603	0.212453	3.20711	6.38432	AR;ESR1										r6 part of magnocellular medial vestibular nucleus	3/301	0.0667382	0.134231	3.35115	9.0715	GATA1;PHOX2B;KLF1
																mantle zone of THyB-I	2/301	0.136603	0.212453	3.20711	6.38432	AR;ESR1										r6 part of nucleus prepositus	3/301	0.0667382	0.134231	3.35115	9.0715	ELF4;FOXA3;RUNX1
																mantle zone of VAP	2/301	0.136603	0.212453	3.20711	6.38432	NR2F1;ESR1										r6 part of posteroventral cochlear nucleus	3/301	0.0667382	0.134231	3.35115	9.0715	HNF1A;PHOX2B;RUNX1
																mantle zone of VTTh	2/301	0.136603	0.212453	3.20711	6.38432	TCF7L2;LEF1										r6 part of the basolateral reticular formation	3/301	0.0667382	0.134231	3.35115	9.0715	ELF4;HNF1A;KLF1
																mantle zone of ZIC	2/301	0.136603	0.212453	3.20711	6.38432	TCF7L2;EBF3										r6 part of the vestibular column	3/301	0.0667382	0.134231	3.35115	9.0715	OTX2;PHOX2B;KLF1
																mantle zone of isBL	2/301	0.136603	0.212453	3.20711	6.38432	EBF3;HNF1A										r7 (gustatory) part of solitary complex	3/301	0.0667382	0.134231	3.35115	9.0715	ELF4;MITF;KLF1
																mantle zone of isBM	2/301	0.136603	0.212453	3.20711	6.38432	FOXA1;RUNX1										r7 basal plate	3/301	0.0667382	0.134231	3.35115	9.0715	ELF4;FOXA3;RUNX1
																mantle zone of m1B	2/301	0.136603	0.212453	3.20711	6.38432	FOXA1;FOXA2										r7 part of basolateral reticular formation	3/301	0.0667382	0.134231	3.35115	9.0715	FOXA3;KLF1;NFE2L2
																mantle zone of m2AL	2/301	0.136603	0.212453	3.20711	6.38432	TCF7L2;EBF3										r7 part of paragigantocellular nucleus	3/301	0.0667382	0.134231	3.35115	9.0715	ELF4;MITF;FOXA3
																mantle zone of m2Lim	2/301	0.136603	0.212453	3.20711	6.38432	GATA4;EBF3										r7 part of rostral ventromedial reticular area	3/301	0.0667382	0.134231	3.35115	9.0715	ELF4;MITF;FOXA3
																mantle zone of p1Lim	2/301	0.136603	0.212453	3.20711	6.38432	TCF7L2;EBF3										r7 part of the trigeminal column	3/301	0.0667382	0.134231	3.35115	9.0715	CDX2;MYC;PHOX2B
																mantle zone of p3B	2/301	0.136603	0.212453	3.20711	6.38432	FOXA1;EBF3										r7 part of trigeminal transition zone	3/301	0.0667382	0.134231	3.35115	9.0715	CDX2;PHOX2B;NFE2L2
																mantle zone of r10Tr	2/301	0.136603	0.212453	3.20711	6.38432	EBF3;NFE2L2										r7 portion of ambiguous motor nucleus	3/301	0.0667382	0.134231	3.35115	9.0715	CDX2;MYC;NFE2L2
																mantle zone of r2Ve	2/301	0.136603	0.212453	3.20711	6.38432	SOX17;OTX2										r8 part of dorsal parvicellular reticular formation	3/301	0.0667382	0.134231	3.35115	9.0715	MYC;KLF1;NFE2L2
																mantle zone of r3Co	2/301	0.136603	0.212453	3.20711	6.38432	NFE2;OTX2										r8 part of gigantocellular reticular area	3/301	0.0667382	0.134231	3.35115	9.0715	ELF4;RUNX1;NFE2L2
																mantle zone of r4BI	2/301	0.136603	0.212453	3.20711	6.38432	HOXB13;KLF1										r8 part of inferior olive	3/301	0.0667382	0.134231	3.35115	9.0715	SOX17;ELF4;NFE2L2
																mantle zone of r4BM	2/301	0.136603	0.212453	3.20711	6.38432	MYC;HOXB13										r8 part of spinal trigeminal nucleus, interpolar part	3/301	0.0667382	0.134231	3.35115	9.0715	CDX2;PHOX2B;NFE2L2
																mantle zone of r5BL	2/301	0.136603	0.212453	3.20711	6.38432	MYC;KLF1										r9 part of nucleus gracilis	3/301	0.0667382	0.134231	3.35115	9.0715	ELF4;WT1;GATA2
																mantle zone of r5BM	2/301	0.136603	0.212453	3.20711	6.38432	MYC;HOXB13										r9 part of spinal vestibular nucleus	3/301	0.0667382	0.134231	3.35115	9.0715	EBF3;PHOX2B;SPDEF
																mantle zone of r5Co	2/301	0.136603	0.212453	3.20711	6.38432	SOX17;OTX2										r9 part of the basolateral reticular formation	3/301	0.0667382	0.134231	3.35115	9.0715	MYC;KLF1;NFE2L2
																mantle zone of r6BM	2/301	0.136603	0.212453	3.20711	6.38432	HOXB13;RUNX1										r9 part of the vestibular column	3/301	0.0667382	0.134231	3.35115	9.0715	EBF3;PHOX2B;KLF1
																mantle zone of r6Co	2/301	0.136603	0.212453	3.20711	6.38432	OTX2;FOXA2										reticular complex	3/301	0.0667382	0.134231	3.35115	9.0715	TCF7L2;LEF1;NR2F1
																mantle zone of r6Ve	2/301	0.136603	0.212453	3.20711	6.38432	OTX2;KLF1										reticular nucleus	3/301	0.0667382	0.134231	3.35115	9.0715	TCF7L2;LEF1;NR2F1
																mantle zone of r7BL	2/301	0.136603	0.212453	3.20711	6.38432	KLF1;NFE2L2										retrohypothalamic nucleus	3/301	0.0667382	0.134231	3.35115	9.0715	SOX2;TCF7L2;REST
																mantle zone of r7Ve	2/301	0.136603	0.212453	3.20711	6.38432	OTX2;KLF1										retromammillary area, lateral part	3/301	0.0667382	0.134231	3.35115	9.0715	FOXA1;SMAD2;NFIL3
																mantle zone of r8BM	2/301	0.136603	0.212453	3.20711	6.38432	RUNX1;NFE2L2										rhombomere 4	3/301	0.0667382	0.134231	3.35115	9.0715	ELF4;MYC;HOXB13
																mantle zone of r8Tr	2/301	0.136603	0.212453	3.20711	6.38432	MYC;NFE2L2										rhombomere 6	3/301	0.0667382	0.134231	3.35115	9.0715	ELF4;MYC;FOXA3
																mantle zone of r9BM	2/301	0.136603	0.212453	3.20711	6.38432	RUNX1;NFE2L2										rostral zona incerta	3/301	0.0667382	0.134231	3.35115	9.0715	TCF7L2;HNF4G;EBF3
																mantle zone of r9Tr	2/301	0.136603	0.212453	3.20711	6.38432	MYC;NFE2L2										shell of P-DMH	3/301	0.0667382	0.134231	3.35115	9.0715	REST;ERG;ESR1
																mantle zone of r9Ve	2/301	0.136603	0.212453	3.20711	6.38432	EBF3;KLF1										shell of VMH	3/301	0.0667382	0.134231	3.35115	9.0715	AR;STAT3;ESR1
																mantle zone of the Fc	2/301	0.136603	0.212453	3.20711	6.38432	FOXA1;SOX17										striatal amygdala	3/301	0.0667382	0.134231	3.35115	9.0715	AR;KLF5;OTX2
																medial (magnocellular) part of MD	2/301	0.136603	0.212453	3.20711	6.38432	TCF7L2;LEF1										subethmoid nucleus	3/301	0.0667382	0.134231	3.35115	9.0715	TCF7L2;LEF1;NR3C1
																medial basal reticular formation of m1	2/301	0.136603	0.212453	3.20711	6.38432	FOXA1;EBF3										subpallial septum	3/301	0.0667382	0.134231	3.35115	9.0715	SOX2;EOMES;REST
																medial geniculate nucleus	2/301	0.136603	0.212453	3.20711	6.38432	TCF7L2;LEF1										substantia innominata/basal nucleus	3/301	0.0667382	0.134231	3.35115	9.0715	SOX2;ESR1;FLI1
																medial habenular nucleus	2/301	0.136603	0.212453	3.20711	6.38432	SOX17;OTX2										superficial gray layer of SC	3/301	0.0667382	0.134231	3.35115	9.0715	SOX17;LEF1;HNF4G
																medial part of r4B	2/301	0.136603	0.212453	3.20711	6.38432	MYC;HOXB13										superficial mantle of isBM	3/301	0.0667382	0.134231	3.35115	9.0715	FOXA1;SPDEF;FOXA2
																medial part of r5B	2/301	0.136603	0.212453	3.20711	6.38432	MYC;HOXB13										superficial stratum of DTTh	3/301	0.0667382	0.134231	3.35115	9.0715	TCF7L2;LEF1;OTX2
																medial part of r6B	2/301	0.136603	0.212453	3.20711	6.38432	HOXB13;RUNX1										superficial stratum of DgSe	3/301	0.0667382	0.134231	3.35115	9.0715	REST;KLF4;ESR1
																medial part of r8B	2/301	0.136603	0.212453	3.20711	6.38432	RUNX1;NFE2L2										superficial stratum of OB	3/301	0.0667382	0.134231	3.35115	9.0715	EOMES;ELF1;MITF
																medial part of r9B	2/301	0.136603	0.212453	3.20711	6.38432	RUNX1;NFE2L2										superficial stratum of PHyB-P	3/301	0.0667382	0.134231	3.35115	9.0715	FOXA1;SMAD2;NFIL3
																medial part of the isB	2/301	0.136603	0.212453	3.20711	6.38432	FOXA1;RUNX1										superficial stratum of PHyB-V	3/301	0.0667382	0.134231	3.35115	9.0715	SMAD2;SOX17;HOXB13
																medial subhabenular nucleus	2/301	0.136603	0.212453	3.20711	6.38432	TCF7L2;SPDEF										superficial stratum of S	3/301	0.0667382	0.134231	3.35115	9.0715	AR;BHLHE40;NR3C1
																medial superior olive	2/301	0.136603	0.212453	3.20711	6.38432	VDR;MYC										superficial stratum of SC	3/301	0.0667382	0.134231	3.35115	9.0715	SOX17;LEF1;HNF4G
																medial trapezoid nucleus	2/301	0.136603	0.212453	3.20711	6.38432	POU5F1;KLF1										superficial stratum of p2B	3/301	0.0667382	0.134231	3.35115	9.0715	FOXA1;NFIL3;HNF4G
																molecular layer of CbVCx	2/301	0.136603	0.212453	3.20711	6.38432	NEUROD1;MAX										superficial stratum of p3B	3/301	0.0667382	0.134231	3.35115	9.0715	FOXA1;SMAD2;NFIL3
																molecular layer of S	2/301	0.136603	0.212453	3.20711	6.38432	BHLHE40;ETV5										superficial stratum of r1BM	3/301	0.0667382	0.134231	3.35115	9.0715	FOXA1;REST;ELF4
																nucleus of the inferior collicular brachium, rostral part	2/301	0.136603	0.212453	3.20711	6.38432	TCF7L2;GATA4										superficial stratum of r1Tr	3/301	0.0667382	0.134231	3.35115	9.0715	FLI1;PHOX2B;SPDEF
																nucleus sagulum, deep part	2/301	0.136603	0.212453	3.20711	6.38432	TCF7L2;GATA4										superficial stratum of r2Co	3/301	0.0667382	0.134231	3.35115	9.0715	NEUROD1;NFE2;OTX2
																nucleus sagulum, superficial part	2/301	0.136603	0.212453	3.20711	6.38432	NEUROD1;GATA4										superficial stratum of r3Co	3/301	0.0667382	0.134231	3.35115	9.0715	NFE2;OTX2;HNF1A
																optic fiber layer of SC	2/301	0.136603	0.212453	3.20711	6.38432	LEF1;OTX2										superficial stratum of r4Ve	3/301	0.0667382	0.134231	3.35115	9.0715	HNF1A;GATA1;PHOX2B
																oval paracentral nucleus	2/301	0.136603	0.212453	3.20711	6.38432	TCF7L2;LEF1										superficial stratum of r5Ve	3/301	0.0667382	0.134231	3.35115	9.0715	OTX2;HNF1A;PHOX2B
																p1 part of parabrachial pigmented nucleus	2/301	0.136603	0.212453	3.20711	6.38432	FOXA1;KLF1										superficial stratum of r6Co	3/301	0.0667382	0.134231	3.35115	9.0715	HNF1A;PHOX2B;RUNX1
																p1 part of the pararubral nucleus	2/301	0.136603	0.212453	3.20711	6.38432	FOXA1;TCF7L2										superficial stratum of r7BI	3/301	0.0667382	0.134231	3.35115	9.0715	ELF4;MITF;FOXA3
																p1 part of the substantia nigra compacta	2/301	0.136603	0.212453	3.20711	6.38432	FOXA1;FOXA2										superficial stratum of r7Lim	3/301	0.0667382	0.134231	3.35115	9.0715	CDX2;MYC;NFE2L2
																p1 portion of the paranigral nucleus	2/301	0.136603	0.212453	3.20711	6.38432	FOXA1;FOXA2										superficial stratum of r8BM	3/301	0.0667382	0.134231	3.35115	9.0715	SOX17;ELF4;NFE2L2
																p2 part of the zona limitans core population	2/301	0.136603	0.212453	3.20711	6.38432	TCF7L2;LEF1										superficial stratum of r8Tr	3/301	0.0667382	0.134231	3.35115	9.0715	CDX2;PHOX2B;NFE2L2
																p2 portion of the substantia nigra pars compacta	2/301	0.136603	0.212453	3.20711	6.38432	FOXA1;FOXA2										supragenual nucleus	3/301	0.0667382	0.134231	3.35115	9.0715	ELF4;HOXB13;FOXA3
																p3 portion of parabrachial pigmented nucleus	2/301	0.136603	0.212453	3.20711	6.38432	FOXA1;EBF3										tectal gray formation	3/301	0.0667382	0.134231	3.35115	9.0715	TCF7L2;LEF1;OTX2
																p3 portion of the substantia nigra pars compacta	2/301	0.136603	0.212453	3.20711	6.38432	FOXA1;EBF3										thalamic (p2) zona limitans domain	3/301	0.0667382	0.134231	3.35115	9.0715	TCF7L2;LEF1;NR2F1
																pallium	2/301	0.136603	0.212453	3.20711	6.38432	EOMES;TCF4										thalamic tegmentum	3/301	0.0667382	0.134231	3.35115	9.0715	FOXA1;TCF7L2;EBF3
																paralemniscal isthmic area	2/301	0.136603	0.212453	3.20711	6.38432	GATA4;SPDEF										triangular septal nucleus	3/301	0.0667382	0.134231	3.35115	9.0715	SOX2;EOMES;EBF3
																paraterete nucleus	2/301	0.136603	0.212453	3.20711	6.38432	SOX17;HOXB13										upper dorsal lateral hypothalamic area	3/301	0.0667382	0.134231	3.35115	9.0715	LEF1;ESR1;FLI1
																paraventricular nucleus, cap part	2/301	0.136603	0.212453	3.20711	6.38432	TCF7L2;ESR1										ventral lateral nucleus	3/301	0.0667382	0.134231	3.35115	9.0715	TCF7L2;LEF1;NR2F1
																paraventricular nucleus, dorsal part	2/301	0.136603	0.212453	3.20711	6.38432	SOX2;ESR1										ventral linear nucleus	3/301	0.0667382	0.134231	3.35115	9.0715	TCF7L2;LEF1;HNF1A
																paraventricular nucleus, peduncular or principal part	2/301	0.136603	0.212453	3.20711	6.38432	SOX2;ESR1										ventral nuclei	3/301	0.0667382	0.134231	3.35115	9.0715	TCF7L2;LEF1;NR2F1
																parvicellular (lateral) subparafascicular nucleus	2/301	0.136603	0.212453	3.20711	6.38432	TCF7L2;LEF1										ventral paracommissural tectal nucleus, m1 part	3/301	0.0667382	0.134231	3.35115	9.0715	TCF7L2;LEF1;OTX2
																parvocellular part of r8LRt	2/301	0.136603	0.212453	3.20711	6.38432	KLF1;NFE2L2										ventral posterior parvicellular nucleus	3/301	0.0667382	0.134231	3.35115	9.0715	TCF7L2;LEF1;MITF
																parvocellular part of the r9LRt	2/301	0.136603	0.212453	3.20711	6.38432	KLF1;NFE2L2										ventral posteromedial nucleus	3/301	0.0667382	0.134231	3.35115	9.0715	TCF7L2;LEF1;NR2F1
																peduncular part of dorsomedial hypothalamic nucleus	2/301	0.136603	0.212453	3.20711	6.38432	SOX2;ESR1										ventrolateral part of alar m1	3/301	0.0667382	0.134231	3.35115	9.0715	TCF7L2;EBF3;HOXB13
																perilemniscal isthmic area	2/301	0.136603	0.212453	3.20711	6.38432	NEUROD1;GATA4										ventrolateral part of isA	3/301	0.0667382	0.134231	3.35115	9.0715	EBF3;GATA4;SPDEF
																perimammillary part of PHyB	2/301	0.136603	0.212453	3.20711	6.38432	FOXA1;EBF3										white matter of cerebellar vermis	3/301	0.0667382	0.134231	3.35115	9.0715	NEUROD1;MAX;FOXA2
																periventricular mantle of isBM	2/301	0.136603	0.212453	3.20711	6.38432	ESR1;RUNX1										zona incerta complex	3/301	0.0667382	0.134231	3.35115	9.0715	TCF7L2;HNF4G;EBF3
																periventricular stratum of AStr	2/301	0.136603	0.212453	3.20711	6.38432	AR;OTX2										zonal layer of SC	3/301	0.0667382	0.134231	3.35115	9.0715	SOX17;HNF4G;HNF1A
																periventricular stratum of CoPV	2/301	0.136603	0.212453	3.20711	6.38432	TCF7L2;OTX2										Olivary pretectal nucleus	4/514	0.0750814	0.150857	2.62718	6.80225	FOXA1;SOX17;OTX2;SPDEF
																periventricular stratum of Hb	2/301	0.136603	0.212453	3.20711	6.38432	SOX17;OTX2										Facial motor nucleus	3/330	0.0827517	0.166098	3.04945	7.59895	AR;FOXA3;NFE2L2
																periventricular stratum of IC	2/301	0.136603	0.212453	3.20711	6.38432	TCF7L2;LEF1										Thalamus	3/334	0.0850808	0.170597	3.01198	7.42199	TCF7L2;LEF1;GATA3
																periventricular stratum of Ist	2/301	0.136603	0.212453	3.20711	6.38432	HNF1A;HOXB13										Field CA1, stratum oriens	3/343	0.0904235	0.181125	2.93091	7.04371	AR;TCF4;NR3C1
																periventricular stratum of JcPV	2/301	0.136603	0.212453	3.20711	6.38432	TCF7L2;OTX2										Suprachiasmatic nucleus	3/370	0.107266	0.214641	2.71154	6.05337	ELF1;KLF4;ESR1
																periventricular stratum of PO1	2/301	0.136603	0.212453	3.20711	6.38432	AR;ESR1										Nucleus of the lateral olfactory tract	3/373	0.109209	0.218307	2.68914	5.95508	HNF4G;GATA3;FLI1
																periventricular stratum of PO2	2/301	0.136603	0.212453	3.20711	6.38432	AR;ESR1										Accessory olfactory bulb	3/379	0.113138	0.225929	2.64542	5.76477	EOMES;PRDM1;GATA1
																periventricular stratum of PPaA	2/301	0.136603	0.212453	3.20711	6.38432	SOX2;ESR1										Central amygdalar nucleus, lateral part	3/401	0.127994	0.255336	2.49638	5.13198	KLF5;OTX2;GATA3
																periventricular stratum of RtC	2/301	0.136603	0.212453	3.20711	6.38432	SOX2;TCF7L2										Ventromedial hypothalamic nucleus	3/405	0.130769	0.260605	2.47103	5.02689	AR;STAT3;ESR1
																periventricular stratum of TPaA	2/301	0.136603	0.212453	3.20711	6.38432	SOX2;ESR1										Septofimbrial nucleus	3/431	0.149311	0.297254	2.31784	4.40789	SOX2;EOMES;EBF3
																periventricular stratum of isBI	2/301	0.136603	0.212453	3.20711	6.38432	GATA3;RUNX1										Subgeniculate nucleus	3/443	0.158146	0.307629	2.25324	4.1555	HNF4G;SPDEF;FOXA2
																periventricular stratum of isBL	2/301	0.136603	0.212453	3.20711	6.38432	FOXA1;GATA3										Taenia tecta	3/448	0.161876	0.307629	2.22735	4.05584	SOX17;GATA1;FOSL2
																periventricular stratum of m1AL	2/301	0.136603	0.212453	3.20711	6.38432	TCF7L2;EBF3										Suprageniculate nucleus	3/478	0.184798	0.307629	2.08346	3.51791	TCF7L2;LEF1;GATA3
																periventricular stratum of m2Lim	2/301	0.136603	0.212453	3.20711	6.38432	TCF7L2;EBF3										Peripeduncular nucleus	3/532	0.228011	0.307629	1.86559	2.75802	TCF7L2;HNF4G;FLI1
																periventricular stratum of r10BM	2/301	0.136603	0.212453	3.20711	6.38432	RUNX1;NFE2L2										AOB, granular layer	2/301	0.239407	0.307629	2.18941	3.12996	EOMES;GATA1
																periventricular stratum of r10Tr	2/301	0.136603	0.212453	3.20711	6.38432	MYB;RUNX1										AOB, mitral cell layer	2/301	0.239407	0.307629	2.18941	3.12996	EOMES;PRDM1
																periventricular stratum of r1Ve	2/301	0.136603	0.212453	3.20711	6.38432	SOX17;OTX2										Accessory facial motor nucleus	2/301	0.239407	0.307629	2.18941	3.12996	HOXB13;KLF1
																periventricular stratum of r6Co	2/301	0.136603	0.212453	3.20711	6.38432	OTX2;FOXA2										Accessory olfactory bulb, mitral layer	2/301	0.239407	0.307629	2.18941	3.12996	EOMES;PRDM1
																periventricular stratum of r7Ve	2/301	0.136603	0.212453	3.20711	6.38432	OTX2;KLF1										Agranular insular area, posterior part	2/301	0.239407	0.307629	2.18941	3.12996	HNF1A;FLI1
																periventricular stratum of r8Ve	2/301	0.136603	0.212453	3.20711	6.38432	OTX2;KLF1										Agranular insular area, posterior part, layer 6a	2/301	0.239407	0.307629	2.18941	3.12996	HNF1A;FLI1
																periventricular stratum of r9Lim	2/301	0.136603	0.212453	3.20711	6.38432	VDR;RUNX1										Anterior cingulate area	2/301	0.239407	0.307629	2.18941	3.12996	PRDM1;GATA1
																pontine hindbrain	2/301	0.136603	0.212453	3.20711	6.38432	MYC;HOXB13										Anterior cingulate area, dorsal part, layer 1	2/301	0.239407	0.307629	2.18941	3.12996	REST;GATA1
																pontomedullary hindbrain	2/301	0.136603	0.212453	3.20711	6.38432	MYC;KLF1										Anterior cingulate area, dorsal part, layer 5	2/301	0.239407	0.307629	2.18941	3.12996	BHLHE40;PRDM1
																posterior intralaminar nucleus	2/301	0.136603	0.212453	3.20711	6.38432	TCF7L2;LEF1										Anterior cingulate area, ventral part	2/301	0.239407	0.307629	2.18941	3.12996	PRDM1;GATA1
																posterior part of Int	2/301	0.136603	0.212453	3.20711	6.38432	NEUROD1;HNF1A										Anterior hypothalamic nucleus, central part	2/301	0.239407	0.307629	2.18941	3.12996	ERG;ESR1
																posterior triangular nucleus	2/301	0.136603	0.212453	3.20711	6.38432	TCF7L2;LEF1										Anterior hypothalamic nucleus, posterior part	2/301	0.239407	0.307629	2.18941	3.12996	ERG;ESR1
																posterolateral cortical amygdaloid area	2/301	0.136603	0.212453	3.20711	6.38432	ERF;ESR1										Anterolateral visual area	2/301	0.239407	0.307629	2.18941	3.12996	KLF5;NR3C1
																posteromedial cortical amygdaloid area	2/301	0.136603	0.212453	3.20711	6.38432	NR2F1;ERF										Anterolateral visual area, layer 2/3	2/301	0.239407	0.307629	2.18941	3.12996	MNT;VDR
																posteroventral part of alar p3	2/301	0.136603	0.212453	3.20711	6.38432	TCF7L2;LEF1										Anteromedial visual area	2/301	0.239407	0.307629	2.18941	3.12996	EGR3;SOX17
																precommissural pretectal domain	2/301	0.136603	0.212453	3.20711	6.38432	TCF7L2;LEF1										Anteroventral preoptic nucleus	2/301	0.239407	0.307629	2.18941	3.12996	AR;KLF4
																pregeniculate nucleus	2/301	0.136603	0.212453	3.20711	6.38432	TCF7L2;LEF1										Basolateral amygdalar nucleus, anterior part	2/301	0.239407	0.307629	2.18941	3.12996	NR2F1;PBX2
																preisthmic midbrain tectum	2/301	0.136603	0.212453	3.20711	6.38432	TCF7L2;GATA4										Basolateral amygdalar nucleus, ventral part	2/301	0.239407	0.307629	2.18941	3.12996	NR2F1;ESR1
																preoptic alar plate	2/301	0.136603	0.212453	3.20711	6.38432	AR;ESR1										Bed nuclei of the stria terminalis	2/301	0.239407	0.307629	2.18941	3.12996	AR;ESR1
																preoptic area	2/301	0.136603	0.212453	3.20711	6.38432	AR;ESR1										Bed nuclei of the stria terminalis, anterior division, dorsomedial nucleus	2/301	0.239407	0.307629	2.18941	3.12996	AR;ESR1
																preoptic telencephalon	2/301	0.136603	0.212453	3.20711	6.38432	AR;ESR1										Bed nuclei of the stria terminalis, anterior division, magnocellular nucleus	2/301	0.239407	0.307629	2.18941	3.12996	AR;ESR1
																pretectum	2/301	0.136603	0.212453	3.20711	6.38432	TCF7L2;SPDEF										Bed nuclei of the stria terminalis, anterior division, oval nucleus	2/301	0.239407	0.307629	2.18941	3.12996	SOX2;EGR3
																prethalamic tegmentum	2/301	0.136603	0.212453	3.20711	6.38432	FOXA1;EBF3										Bed nuclei of the stria terminalis, anterior division, ventral nucleus	2/301	0.239407	0.307629	2.18941	3.12996	AR;ESR1
																prosomere 2	2/301	0.136603	0.212453	3.20711	6.38432	TCF7L2;LEF1										Central amygdalar nucleus	2/301	0.239407	0.307629	2.18941	3.12996	NR2F1;GATA3
																r1 part of intermediate nucleus of the lateral lemniscus	2/301	0.136603	0.212453	3.20711	6.38432	GATA4;SPDEF										Central amygdalar nucleus, medial part	2/301	0.239407	0.307629	2.18941	3.12996	GATA3;ESR1
																r1 part of principal trigeminal sensory nucleus	2/301	0.136603	0.212453	3.20711	6.38432	FLI1;SPDEF										Central linear nucleus raphe	2/301	0.239407	0.307629	2.18941	3.12996	FOXA1;NR2F6
																r1 part of vestibular nucleus Y	2/301	0.136603	0.212453	3.20711	6.38432	SOX17;OTX2										Central lobule	2/301	0.239407	0.307629	2.18941	3.12996	NEUROD1;FOXA2
																r10 alar plate	2/301	0.136603	0.212453	3.20711	6.38432	MYB;NFE2L2										Cerebrum	2/301	0.239407	0.307629	2.18941	3.12996	EOMES;EGR3
																r10 part of solitary complex	2/301	0.136603	0.212453	3.20711	6.38432	MYB;RUNX1										CoPV part of the periaqueductal gray	2/301	0.239407	0.307629	2.18941	3.12996	TCF7L2;OTX2
																r10 part of the trigeminal column	2/301	0.136603	0.212453	3.20711	6.38432	EBF3;NFE2L2										Cortical amygdalar area, anterior part, layer 1	2/301	0.239407	0.307629	2.18941	3.12996	VDR;GATA3
																r2 part of median raphe nucleus	2/301	0.136603	0.212453	3.20711	6.38432	RARA;RUNX1										Culmen	2/301	0.239407	0.307629	2.18941	3.12996	NEUROD1;MAX
																r2 part of principal trigeminal sensory nucleus	2/301	0.136603	0.212453	3.20711	6.38432	FLI1;SPDEF										Declive (VI), granular layer	2/301	0.239407	0.307629	2.18941	3.12996	NEUROD1;MAX
																r2 part of superior vestibular nucleus	2/301	0.136603	0.212453	3.20711	6.38432	SOX17;OTX2										Declive (VI), molecular layer	2/301	0.239407	0.307629	2.18941	3.12996	NEUROD1;MYOD1
																r2 part of vestibular sensory column	2/301	0.136603	0.212453	3.20711	6.38432	SOX17;OTX2										Dentate nucleus	2/301	0.239407	0.307629	2.18941	3.12996	NEUROD1;HNF1A
																r3 part of cochlear sensory column	2/301	0.136603	0.212453	3.20711	6.38432	NFE2;OTX2										Dorsal peduncular area	2/301	0.239407	0.307629	2.18941	3.12996	SOX17;VDR
																r3 part of lateral vestibular nucleus	2/301	0.136603	0.212453	3.20711	6.38432	OTX2;HNF1A										Dorsal peduncular area, layer 1	2/301	0.239407	0.307629	2.18941	3.12996	SOX17;VDR
																r3 roof plate	2/301	0.136603	0.212453	3.20711	6.38432	FOXA1;KLF4										Dorsal peduncular area, layer 2/3	2/301	0.239407	0.307629	2.18941	3.12996	SOX17;FOSL2
																r4 basal plate	2/301	0.136603	0.212453	3.20711	6.38432	MYC;HOXB13										Dorsomedial nucleus of the hypothalamus, anterior part	2/301	0.239407	0.307629	2.18941	3.12996	SOX2;ESR1
																r4 part of medial paralemniscal nucleus	2/301	0.136603	0.212453	3.20711	6.38432	MYC;HOXB13										Ectorhinal area	2/301	0.239407	0.307629	2.18941	3.12996	KLF5;PRDM1
																r5 part of spinal vestibular nucleus	2/301	0.136603	0.212453	3.20711	6.38432	OTX2;HNF1A										Ectorhinal area/Layer 6a	2/301	0.239407	0.307629	2.18941	3.12996	KLF5;NR3C1
																r5 part of the cochlear column	2/301	0.136603	0.212453	3.20711	6.38432	SOX17;OTX2										Entorhinal area, medial part, ventral zone, layer 2	2/301	0.239407	0.307629	2.18941	3.12996	KLF5;STAT3
																r6 part of basomedial reticular formation	2/301	0.136603	0.212453	3.20711	6.38432	HNF1A;RUNX1										Fastigial nucleus	2/301	0.239407	0.307629	2.18941	3.12996	NEUROD1;HNF4G
																r6 part of dorsal cochlear nucleus	2/301	0.136603	0.212453	3.20711	6.38432	OTX2;FOXA2										Field CA1, pyramidal layer	2/301	0.239407	0.307629	2.18941	3.12996	AR;TCF4
																r6 part of posteroventral cochlear nucleus	2/301	0.136603	0.212453	3.20711	6.38432	HNF1A;RUNX1										Field CA1, stratum pyramidale	2/301	0.239407	0.307629	2.18941	3.12996	AR;TCF4
																r6 part of the basolateral reticular formation	2/301	0.136603	0.212453	3.20711	6.38432	HNF1A;KLF1										Field CA2, stratum pyramidale	2/301	0.239407	0.307629	2.18941	3.12996	AR;TCF4
																r6 part of the cochlear column	2/301	0.136603	0.212453	3.20711	6.38432	OTX2;FOXA2										Globus pallidus, external segment	2/301	0.239407	0.307629	2.18941	3.12996	LEF1;GATA3
																r6 part of the vestibular column	2/301	0.136603	0.212453	3.20711	6.38432	OTX2;KLF1										Gustatory areas, layer 4	2/301	0.239407	0.307629	2.18941	3.12996	HNF1A;POU5F1
																r7 part of basolateral reticular formation	2/301	0.136603	0.212453	3.20711	6.38432	KLF1;NFE2L2										Inferior salivatory nucleus	2/301	0.239407	0.307629	2.18941	3.12996	CDX2;PHOX2B
																r7 part of nucleus prepositus	2/301	0.136603	0.212453	3.20711	6.38432	OTX2;RUNX1										Infralimbic area, layer 5	2/301	0.239407	0.307629	2.18941	3.12996	PRDM1;GATA1
																r7 part of parvocellular medial vestibular nucleus	2/301	0.136603	0.212453	3.20711	6.38432	OTX2;KLF1										Infralimbic area, layer 6a	2/301	0.239407	0.307629	2.18941	3.12996	GATA2;GATA1
																r7 part of spinal vestibular nucleus	2/301	0.136603	0.212453	3.20711	6.38432	OTX2;KLF1										Infralimbic area, layer 6b	2/301	0.239407	0.307629	2.18941	3.12996	GATA2;GATA1
																r7 part of the vestibular column	2/301	0.136603	0.212453	3.20711	6.38432	OTX2;KLF1										Interstitial nucleus of Cajal	2/301	0.239407	0.307629	2.18941	3.12996	FOXA1;EBF3
																r7 portion of ambiguous motor nucleus	2/301	0.136603	0.212453	3.20711	6.38432	MYC;NFE2L2										Isocortex	2/301	0.239407	0.307629	2.18941	3.12996	EGR3;BHLHE40
																r7 portion of the hypoglossal motor nucleus	2/301	0.136603	0.212453	3.20711	6.38432	OTX2;RUNX1										JcP contribution to LTL	2/301	0.239407	0.307629	2.18941	3.12996	TCF7L2;MNT
																r8 part of gigantocellular reticular area	2/301	0.136603	0.212453	3.20711	6.38432	RUNX1;NFE2L2										JcPV part of the periaqueductal gray	2/301	0.239407	0.307629	2.18941	3.12996	TCF7L2;OTX2
																r8 part of inferior olive	2/301	0.136603	0.212453	3.20711	6.38432	SOX17;NFE2L2										Lateral hypothalamic area	2/301	0.239407	0.307629	2.18941	3.12996	SMAD2;ESR1
																r8 part of linear nucleus	2/301	0.136603	0.212453	3.20711	6.38432	MYC;NFE2L2										Lateral posterior nucleus of the thalamus	2/301	0.239407	0.307629	2.18941	3.12996	TCF7L2;LEF1
																r8 part of nucleus of Roller	2/301	0.136603	0.212453	3.20711	6.38432	RUNX1;NFE2L2										Lateral septal nucleus, rostral (rostroventral) part	2/301	0.239407	0.307629	2.18941	3.12996	SOX2;REST
																r8 part of parvocellular medial vestibular nucleus	2/301	0.136603	0.212453	3.20711	6.38432	OTX2;KLF1										Lateral terminal nucleus of the accessory optic tract	2/301	0.239407	0.307629	2.18941	3.12996	HNF4G;FLI1
																r8 part of the trigeminal column	2/301	0.136603	0.212453	3.20711	6.38432	MYC;NFE2L2										Lateral vestibular nucleus	2/301	0.239407	0.307629	2.18941	3.12996	SOX17;GATA1
																r8 portion of the hypoglossal motor nucleus	2/301	0.136603	0.212453	3.20711	6.38432	VDR;RUNX1										Lateral visual area	2/301	0.239407	0.307629	2.18941	3.12996	KLF5;NR3C1
																r9 part of nucleus of Roller	2/301	0.136603	0.212453	3.20711	6.38432	RUNX1;NFE2L2										Lateral visual area, layer 6a	2/301	0.239407	0.307629	2.18941	3.12996	KLF5;NR3C1
																r9 part of spinal vestibular nucleus	2/301	0.136603	0.212453	3.20711	6.38432	EBF3;SPDEF										Lingula (I), granular layer	2/301	0.239407	0.307629	2.18941	3.12996	SOX13;FOXA3
																r9 part of the trigeminal column	2/301	0.136603	0.212453	3.20711	6.38432	MYC;NFE2L2										Lobule II	2/301	0.239407	0.307629	2.18941	3.12996	NEUROD1;FOXA2
																r9 part of the vestibular column	2/301	0.136603	0.212453	3.20711	6.38432	EBF3;KLF1										Lobule II, granular layer	2/301	0.239407	0.307629	2.18941	3.12996	NEUROD1;FOXA2
																r9 portion of ambiguous motor nucleus (postmigratory)	2/301	0.136603	0.212453	3.20711	6.38432	MYC;NFE2L2										Lobule II, molecular layer	2/301	0.239407	0.307629	2.18941	3.12996	NEUROD1;FOXA2
																r9 portion of the hypoglossal motor nucleus	2/301	0.136603	0.212453	3.20711	6.38432	VDR;RUNX1										Lobules IV-V	2/301	0.239407	0.307629	2.18941	3.12996	NEUROD1;MAX
																r9 portion of vagal motor nucleus (postmigratory)	2/301	0.136603	0.212453	3.20711	6.38432	VDR;RUNX1										Lobules IV-V, granular layer	2/301	0.239407	0.307629	2.18941	3.12996	NEUROD1;MAX
																red nucleus, parvicellular part	2/301	0.136603	0.212453	3.20711	6.38432	FOXA1;FOXA2										Lobules IV-V, molecular layer	2/301	0.239407	0.307629	2.18941	3.12996	NEUROD1;MAX
																reticular formation of CoPD	2/301	0.136603	0.212453	3.20711	6.38432	TCF7L2;MNT										Main olfactory bulb	2/301	0.239407	0.307629	2.18941	3.12996	EOMES;MITF
																retrohypothalamic nucleus	2/301	0.136603	0.212453	3.20711	6.38432	SOX2;TCF7L2										Main olfactory bulb, glomerular layer	2/301	0.239407	0.307629	2.18941	3.12996	EOMES;MITF
																rhombomere 4	2/301	0.136603	0.212453	3.20711	6.38432	MYC;HOXB13										Main olfactory bulb, granule layer	2/301	0.239407	0.307629	2.18941	3.12996	EOMES;MITF
																rostral paraventricular nucleus	2/301	0.136603	0.212453	3.20711	6.38432	SOX2;ESR1										Main olfactory bulb, inner plexiform layer	2/301	0.239407	0.307629	2.18941	3.12996	EOMES;MITF
																rostral secondary prosencephalon	2/301	0.136603	0.212453	3.20711	6.38432	AR;ESR1										Main olfactory bulb, mitral layer	2/301	0.239407	0.307629	2.18941	3.12996	EOMES;MITF
																rostral zona incerta	2/301	0.136603	0.212453	3.20711	6.38432	TCF7L2;EBF3										Main olfactory bulb, outer plexiform layer	2/301	0.239407	0.307629	2.18941	3.12996	EOMES;MITF
																second (ventral) preoptic domain	2/301	0.136603	0.212453	3.20711	6.38432	AR;ESR1										Medial amygdalar nucleus, anteroventral part	2/301	0.239407	0.307629	2.18941	3.12996	SOX17;FLI1
																septohypothalamic nucleus	2/301	0.136603	0.212453	3.20711	6.38432	SOX2;ERG										Medial amygdalar nucleus, posteroventral part	2/301	0.239407	0.307629	2.18941	3.12996	ESR1;SPDEF
																shell of P-DMH	2/301	0.136603	0.212453	3.20711	6.38432	ERG;ESR1										Medial preoptic area	2/301	0.239407	0.307629	2.18941	3.12996	AR;ESR1
																shell of T-DMH	2/301	0.136603	0.212453	3.20711	6.38432	AR;ESR1										Midbrain raphe nuclei	2/301	0.239407	0.307629	2.18941	3.12996	FOXA1;REST
																shell of VMH	2/301	0.136603	0.212453	3.20711	6.38432	AR;ESR1										Nodulus (X), granular layer	2/301	0.239407	0.307629	2.18941	3.12996	NEUROD1;OTX2
																striatal amygdala	2/301	0.136603	0.212453	3.20711	6.38432	AR;OTX2										Nucleus of the brachium of the inferior colliculus	2/301	0.239407	0.307629	2.18941	3.12996	TCF7L2;GATA3
																striohypothalamic nucleus	2/301	0.136603	0.212453	3.20711	6.38432	AR;ESR1										Nucleus of the lateral lemniscus	2/301	0.239407	0.307629	2.18941	3.12996	GATA4;GATA3
																sublayer 6b of CCx	2/301	0.136603	0.212453	3.20711	6.38432	NR3C1;ETV5										Nucleus of the lateral lemniscus, horizontal part	2/301	0.239407	0.307629	2.18941	3.12996	GATA4;SPDEF
																sublayer 6b of PCx	2/301	0.136603	0.212453	3.20711	6.38432	BHLHE40;NR3C1										Nucleus of the lateral olfactory tract, molecular layer	2/301	0.239407	0.307629	2.18941	3.12996	HNF4G;GATA3
																submammillothalamic nucleus	2/301	0.136603	0.212453	3.20711	6.38432	FOXA1;ERG										Nucleus of the optic tract	2/301	0.239407	0.307629	2.18941	3.12996	TCF7L2;MNT
																subpallial septum	2/301	0.136603	0.212453	3.20711	6.38432	SOX2;EOMES										Nucleus sagulum	2/301	0.239407	0.307629	2.18941	3.12996	WT1;GATA3
																superficial gray layer of SC	2/301	0.136603	0.212453	3.20711	6.38432	SOX17;LEF1										Nucleus y	2/301	0.239407	0.307629	2.18941	3.12996	SOX17;OTX2
																superficial layers of TG	2/301	0.136603	0.212453	3.20711	6.38432	OTX2;SPDEF										OB glomerular layer	2/301	0.239407	0.307629	2.18941	3.12996	EOMES;MITF
																superficial stratum of AOD	2/301	0.136603	0.212453	3.20711	6.38432	SOX17;HNF1A										OB granular layer	2/301	0.239407	0.307629	2.18941	3.12996	EOMES;MITF
																superficial stratum of CA	2/301	0.136603	0.212453	3.20711	6.38432	AR;TCF4										OB inner plexiform layer	2/301	0.239407	0.307629	2.18941	3.12996	EOMES;MITF
																superficial stratum of CoPD	2/301	0.136603	0.212453	3.20711	6.38432	TCF7L2;SPDEF										OB mitral cell layer	2/301	0.239407	0.307629	2.18941	3.12996	EOMES;MITF
																superficial stratum of CoPL	2/301	0.136603	0.212453	3.20711	6.38432	TCF7L2;MNT										OB olfactory fiber layer	2/301	0.239407	0.307629	2.18941	3.12996	EOMES;ELF1
																superficial stratum of DgSe	2/301	0.136603	0.212453	3.20711	6.38432	KLF4;ESR1										OB outer plexiform layer	2/301	0.239407	0.307629	2.18941	3.12996	EOMES;MITF
																superficial stratum of ITTh	2/301	0.136603	0.212453	3.20711	6.38432	TCF7L2;LEF1										Orbital area, medial part, layer 1	2/301	0.239407	0.307629	2.18941	3.12996	SOX17;PRDM1
																superficial stratum of InsCx (cortical plate/marginal zone)	2/301	0.136603	0.212453	3.20711	6.38432	HNF1A;FLI1										Orbital area, medial part, layer 2/3	2/301	0.239407	0.307629	2.18941	3.12996	PRDM1;GATA1
																superficial stratum of Ist	2/301	0.136603	0.212453	3.20711	6.38432	NEUROD1;GATA4										Orbital area, medial part, layer 5	2/301	0.239407	0.307629	2.18941	3.12996	ELF1;PRDM1
																superficial stratum of JcPL	2/301	0.136603	0.212453	3.20711	6.38432	TCF7L2;MNT										Pallidum	2/301	0.239407	0.307629	2.18941	3.12996	GATA3;ESR1
																superficial stratum of PHyB-V	2/301	0.136603	0.212453	3.20711	6.38432	SOX17;HOXB13										Pallidum, caudal region	2/301	0.239407	0.307629	2.18941	3.12996	AR;ESR1
																superficial stratum of PaS (cortical plate/marginal zone)	2/301	0.136603	0.212453	3.20711	6.38432	TCF4;POU5F1										Pallidum, dorsal region	2/301	0.239407	0.307629	2.18941	3.12996	LEF1;GATA3
																superficial stratum of SC	2/301	0.136603	0.212453	3.20711	6.38432	SOX17;LEF1										Parabrachial nucleus, lateral division, central lateral part	2/301	0.239407	0.307629	2.18941	3.12996	NEUROD1;HNF4G
																superficial stratum of VTTh	2/301	0.136603	0.212453	3.20711	6.38432	TCF7L2;LEF1										Parabrachial nucleus, medial division, external medial part	2/301	0.239407	0.307629	2.18941	3.12996	NEUROD1;ESR1
																superficial stratum of cerebellar vermis	2/301	0.136603	0.212453	3.20711	6.38432	NEUROD1;MAX										Parastrial nucleus	2/301	0.239407	0.307629	2.18941	3.12996	AR;ESR1
																superficial stratum of isLim	2/301	0.136603	0.212453	3.20711	6.38432	GATA4;SPDEF										Parasubiculum, layer 1	2/301	0.239407	0.307629	2.18941	3.12996	FOXA1;WT1
																superficial stratum of m2ADL	2/301	0.136603	0.212453	3.20711	6.38432	NEUROD1;GATA4										Paraventricular hypothalamic nucleus	2/301	0.239407	0.307629	2.18941	3.12996	SOX2;ESR1
																superficial stratum of p2ZL	2/301	0.136603	0.212453	3.20711	6.38432	TCF7L2;LEF1										Paraventricular hypothalamic nucleus, parvicellular division	2/301	0.239407	0.307629	2.18941	3.12996	SOX2;ESR1
																superficial stratum of p3ZL	2/301	0.136603	0.212453	3.20711	6.38432	TCF7L2;LEF1										Paraventricular hypothalamic nucleus, parvicellular division, anterior parvicellular part	2/301	0.239407	0.307629	2.18941	3.12996	SOX2;ESR1
																superficial stratum of r1BL	2/301	0.136603	0.212453	3.20711	6.38432	GATA4;SPDEF										Paraventricular hypothalamic nucleus, parvicellular division, medial parvicellular part, dorsal zone	2/301	0.239407	0.307629	2.18941	3.12996	REST;ESR1
																superficial stratum of r1Tr	2/301	0.136603	0.212453	3.20711	6.38432	FLI1;SPDEF										Periaqueductal gray	2/301	0.239407	0.307629	2.18941	3.12996	TCF7L2;EBF3
																superficial stratum of r2Tr	2/301	0.136603	0.212453	3.20711	6.38432	FLI1;SPDEF										Periventricular hypothalamic nucleus, posterior part	2/301	0.239407	0.307629	2.18941	3.12996	ESR1;NR2F6
																superficial stratum of r3Ve	2/301	0.136603	0.212453	3.20711	6.38432	OTX2;HNF1A										Periventricular region	2/301	0.239407	0.307629	2.18941	3.12996	AR;ESR1
																superficial stratum of r5BM	2/301	0.136603	0.212453	3.20711	6.38432	POU5F1;KLF1										Periventricular zone	2/301	0.239407	0.307629	2.18941	3.12996	STAT3;ESR1
																superficial stratum of r5Ve	2/301	0.136603	0.212453	3.20711	6.38432	OTX2;HNF1A										Piriform-amygdalar area	2/301	0.239407	0.307629	2.18941	3.12996	KLF5;ERF
																superficial stratum of r6Co	2/301	0.136603	0.212453	3.20711	6.38432	HNF1A;RUNX1										Piriform-amygdalar area, molecular layer	2/301	0.239407	0.307629	2.18941	3.12996	KLF5;ERF
																superficial stratum of r7Lim	2/301	0.136603	0.212453	3.20711	6.38432	MYC;NFE2L2										Piriform-amygdalar area, pyramidal layer	2/301	0.239407	0.307629	2.18941	3.12996	KLF5;ERF
																superficial stratum of r7Ve	2/301	0.136603	0.212453	3.20711	6.38432	OTX2;KLF1										Pontine gray	2/301	0.239407	0.307629	2.18941	3.12996	ELF4;VDR
																superficial stratum of r8BL	2/301	0.136603	0.212453	3.20711	6.38432	MYC;NFE2L2										Posterior hypothalamic nucleus	2/301	0.239407	0.307629	2.18941	3.12996	FOXA1;EBF3
																superficial stratum of r8BM	2/301	0.136603	0.212453	3.20711	6.38432	SOX17;NFE2L2										Posterior limiting nucleus of the thalamus	2/301	0.239407	0.307629	2.18941	3.12996	TCF7L2;GATA3
																superficial stratum of r9BL	2/301	0.136603	0.212453	3.20711	6.38432	KLF1;NFE2L2										Posterior parietal association areas, layer 5	2/301	0.239407	0.307629	2.18941	3.12996	BHLHE40;ERG
																superficial stratum of r9Lim	2/301	0.136603	0.212453	3.20711	6.38432	MYC;NFE2L2										Postsubiculum	2/301	0.239407	0.307629	2.18941	3.12996	ELF1;GATA3
																superficial stratum of the Fc	2/301	0.136603	0.212453	3.20711	6.38432	FOXA1;SOX17										Postsubiculum, layer 2	2/301	0.239407	0.307629	2.18941	3.12996	ELF1;GATA3
																tegmental field of p3 (Forel's field)	2/301	0.136603	0.212453	3.20711	6.38432	FOXA1;EBF3										Prelimbic area, layer 6b	2/301	0.239407	0.307629	2.18941	3.12996	GATA2;GATA1
																temporal muscle trigeminal motor cell group	2/301	0.136603	0.212453	3.20711	6.38432	SPDEF;FOXA2										Primary somatosensory area	2/301	0.239407	0.307629	2.18941	3.12996	BHLHE40;FOXA3
																terminal nucleus of the stria medullaris	2/301	0.136603	0.212453	3.20711	6.38432	ERG;ESR1										Primary somatosensory area, lower limb, layer 1	2/301	0.239407	0.307629	2.18941	3.12996	FOXO1;NR2F6
																ventral isthmic part of dorsal raphe nucleus	2/301	0.136603	0.212453	3.20711	6.38432	ESR1;RUNX1										Primary somatosensory area, lower limb, layer 6a	2/301	0.239407	0.307629	2.18941	3.12996	MNT;BHLHE40
																ventral part of CoP	2/301	0.136603	0.212453	3.20711	6.38432	TCF7L2;OTX2										Primary somatosensory area, lower limb, layer 6b	2/301	0.239407	0.307629	2.18941	3.12996	MNT;NR3C1
																ventral posterior parvicellular nucleus	2/301	0.136603	0.212453	3.20711	6.38432	TCF7L2;LEF1										Primary somatosensory area, trunk	2/301	0.239407	0.307629	2.18941	3.12996	BHLHE40;FOXA3
																ventral premammillary nucleus (migrated)	2/301	0.136603	0.212453	3.20711	6.38432	AR;ESR1										Primary somatosensory area, trunk, layer 2/3	2/301	0.239407	0.307629	2.18941	3.12996	FOXA3;NR2F6
																ventral subnucleus of MG	2/301	0.136603	0.212453	3.20711	6.38432	TCF7L2;LEF1										Primary somatosensory area, trunk, layer 5	2/301	0.239407	0.307629	2.18941	3.12996	BHLHE40;FOXA3
																ventral tier of thalamus	2/301	0.136603	0.212453	3.20711	6.38432	TCF7L2;LEF1										Primary somatosensory area, trunk, layer 6a	2/301	0.239407	0.307629	2.18941	3.12996	BHLHE40;FOXA3
																ventrolateral part of alar p1	2/301	0.136603	0.212453	3.20711	6.38432	TCF7L2;EBF3										Primary somatosensory area, trunk, layer 6b	2/301	0.239407	0.307629	2.18941	3.12996	BHLHE40;NR3C1
																ventrolateral part of m2A	2/301	0.136603	0.212453	3.20711	6.38432	GATA4;EBF3										Primary visual area, layer 1	2/301	0.239407	0.307629	2.18941	3.12996	EGR3;KLF5
																ventromedial nucleus	2/301	0.136603	0.212453	3.20711	6.38432	TCF7L2;LEF1										Purkinje cell layer of CbVCx	2/301	0.239407	0.307629	2.18941	3.12996	NEUROD1;FOXA2
																ventropallial amygdalopiriform area	2/301	0.136603	0.212453	3.20711	6.38432	NR2F1;ESR1										Retrosplenial area	2/301	0.239407	0.307629	2.18941	3.12996	HNF1A;ERG
																zona incerta complex	2/301	0.136603	0.212453	3.20711	6.38432	TCF7L2;EBF3										Retrosplenial area, dorsal part, layer 6a	2/301	0.239407	0.307629	2.18941	3.12996	SOX17;BHLHE40
																zonal layer of SC	2/301	0.136603	0.212453	3.20711	6.38432	SOX17;HNF1A										Retrosplenial area, lateral agranular part	2/301	0.239407	0.307629	2.18941	3.12996	EGR3;SOX17
																Facial motor nucleus	2/330	0.158139	0.245728	2.91924	5.38391	AR;NFE2L2										Retrosplenial area, lateral agranular part, layer 2/3	2/301	0.239407	0.307629	2.18941	3.12996	EGR3;SOX17
																Field CA1	2/344	0.168761	0.262	2.79775	4.97795	AR;TCF4										Retrosplenial area, lateral agranular part, layer 5	2/301	0.239407	0.307629	2.18941	3.12996	SOX17;BHLHE40
																Field CA1, stratum radiatum	2/345	0.169524	0.262951	2.78945	4.95059	AR;TCF4										Retrosplenial area, ventral part	2/301	0.239407	0.307629	2.18941	3.12996	HNF1A;ERG
																Anterodorsal nucleus	2/354	0.176424	0.273411	2.71688	4.71342	LEF1;FOXA2										Retrosplenial area, ventral part, layer 1	2/301	0.239407	0.307629	2.18941	3.12996	HNF1A;ERG
																Anteromedial nucleus	2/357	0.178735	0.276745	2.69351	4.63782	TCF7L2;LEF1										Retrosplenial area, ventral part, layer 2	2/301	0.239407	0.307629	2.18941	3.12996	ELF4;ERG
																Suprachiasmatic nucleus	2/370	0.188802	0.292074	2.59663	4.32874	KLF4;ESR1										Retrosplenial area, ventral part, layer 2/3	2/301	0.239407	0.307629	2.18941	3.12996	HNF1A;ERG
																Nucleus of the lateral olfactory tract	2/373	0.191137	0.295424	2.57524	4.26142	GATA3;FLI1										Retrosplenial area, ventral part, layer 6a	2/301	0.239407	0.307629	2.18941	3.12996	TCF4;ETV5
																Dorsal tegmental nucleus	2/396	0.209167	0.323006	2.42206	3.78961	SOX2;FOXA2										Spinal nucleus of the trigeminal, oral part, caudal dorsomedial part	2/301	0.239407	0.307629	2.18941	3.12996	CDX2;PHOX2B
																Nucleus incertus	2/398	0.210744	0.325153	2.40958	3.75199	HOXB13;NR2F6										Spinal nucleus of the trigeminal, oral part, middle dorsomedial part, dorsal zone	2/301	0.239407	0.307629	2.18941	3.12996	CDX2;PHOX2B
																Central amygdalar nucleus, lateral part	2/401	0.213113	0.328517	2.3911	3.69648	OTX2;GATA3										Spinal nucleus of the trigeminal, oral part, middle dorsomedial part, ventral zone	2/301	0.239407	0.307629	2.18941	3.12996	GATA3;PHOX2B
																Trochlear nucleus	2/405	0.216275	0.332804	2.36688	3.62418	ESR1;RUNX1										Subceruleus nucleus	2/301	0.239407	0.307629	2.18941	3.12996	PHOX2B;KLF1
																Ventromedial hypothalamic nucleus	2/405	0.216275	0.332804	2.36688	3.62418	AR;ESR1										Subiculum, dorsal part, molecular layer	2/301	0.239407	0.307629	2.18941	3.12996	BHLHE40;TCF4
																Field CA2, stratum radiatum	2/410	0.220235	0.338598	2.33728	3.53645	AR;TCF4										Subiculum, ventral part, stratum radiatum	2/301	0.239407	0.307629	2.18941	3.12996	AR;FOSL2
																Supraoptic nucleus	2/424	0.231356	0.355384	2.25812	3.30543	SOX17;HNF1A										Substantia nigra, reticular part	2/301	0.239407	0.307629	2.18941	3.12996	FOXA1;NFIL3
																Field CA2	2/425	0.232152	0.356294	2.25267	3.28971	AR;TCF4										Superior colliculus, optic layer	2/301	0.239407	0.307629	2.18941	3.12996	LEF1;OTX2
																Field CA2, stratum oriens	2/431	0.236933	0.363311	2.22048	3.19744	AR;TCF4										Superior colliculus, zonal layer	2/301	0.239407	0.307629	2.18941	3.12996	HNF4G;SPDEF
																Fasciola cinerea	2/435	0.240124	0.367881	2.19952	3.13783	FOXA1;SOX17										Superior olivary complex	2/301	0.239407	0.307629	2.18941	3.12996	AR;MYC
																Subgeniculate nucleus	2/443	0.246514	0.377339	2.15873	3.02295	SPDEF;FOXA2										Superior olivary complex, medial part	2/301	0.239407	0.307629	2.18941	3.12996	AR;MYC
																Anterior hypothalamic nucleus	2/492	0.285754	0.43702	1.93798	2.42756	ERG;ESR1										Superior olivary complex, periolivary region	2/301	0.239407	0.307629	2.18941	3.12996	AR;MYC
																Peripeduncular nucleus	2/532	0.31771	0.481878	1.78803	2.05019	TCF7L2;FLI1										Supplemental somatosensory area, layer 6a	2/301	0.239407	0.307629	2.18941	3.12996	REST;RUNX1
																AOB, glomerular layer	1/301	0.479392	0.481878	1.56008	1.14703	EOMES										Supramammillary nucleus, medial part	2/301	0.239407	0.307629	2.18941	3.12996	FOXA1;NFIL3
																AOB, granular layer	1/301	0.479392	0.481878	1.56008	1.14703	EOMES										Supratrigeminal nucleus	2/301	0.239407	0.307629	2.18941	3.12996	PHOX2B;SPDEF
																AOB, internal plexiform layer	1/301	0.479392	0.481878	1.56008	1.14703	EOMES										Taenia tecta, dorsal part, layer 1	2/301	0.239407	0.307629	2.18941	3.12996	SOX17;GATA1
																AOB, mitral cell layer	1/301	0.479392	0.481878	1.56008	1.14703	EOMES										Taenia tecta, ventral part	2/301	0.239407	0.307629	2.18941	3.12996	EOMES;SOX17
																Accessory olfactory bulb, granular layer	1/301	0.479392	0.481878	1.56008	1.14703	EOMES										Taenia tecta, ventral part, layer 1	2/301	0.239407	0.307629	2.18941	3.12996	SOX17;HNF4G
																Accessory olfactory bulb, mitral layer	1/301	0.479392	0.481878	1.56008	1.14703	EOMES										Taenia tecta, ventral part, layer 3	2/301	0.239407	0.307629	2.18941	3.12996	GATA2;FOSL2
																Agranular insular area	1/301	0.479392	0.481878	1.56008	1.14703	FLI1										Temporal association areas	2/301	0.239407	0.307629	2.18941	3.12996	KLF5;NR3C1
																Agranular insular area, dorsal part	1/301	0.479392	0.481878	1.56008	1.14703	FLI1										Thalamus, polymodal association cortex related	2/301	0.239407	0.307629	2.18941	3.12996	TCF7L2;LEF1
																Agranular insular area, dorsal part, layer 1	1/301	0.479392	0.481878	1.56008	1.14703	HNF1A										Tuberomammillary nucleus	2/301	0.239407	0.307629	2.18941	3.12996	SMAD2;ESR1
																Agranular insular area, dorsal part, layer 2/3	1/301	0.479392	0.481878	1.56008	1.14703	FLI1										Ventral medial nucleus of the thalamus	2/301	0.239407	0.307629	2.18941	3.12996	TCF7L2;LEF1
																Agranular insular area, dorsal part, layer 5	1/301	0.479392	0.481878	1.56008	1.14703	FLI1										Ventral tegmental area	2/301	0.239407	0.307629	2.18941	3.12996	FOXA1;EBF3
																Agranular insular area, dorsal part, layer 6a	1/301	0.479392	0.481878	1.56008	1.14703	POU5F1										Ventromedial hypothalamic nucleus, dorsomedial part	2/301	0.239407	0.307629	2.18941	3.12996	GATA2;ESR1
																Agranular insular area, ventral part	1/301	0.479392	0.481878	1.56008	1.14703	FLI1										Vestibular nuclei	2/301	0.239407	0.307629	2.18941	3.12996	GATA1;FOXA3
																Agranular insular area, ventral part, layer 2/3	1/301	0.479392	0.481878	1.56008	1.14703	POU5F1										alar part of peduncular hypothalamus	2/301	0.239407	0.307629	2.18941	3.12996	HNF4G;ESR1
																Agranular insular area, ventral part, layer 5	1/301	0.479392	0.481878	1.56008	1.14703	FLI1										alar part of terminal hypothalamus	2/301	0.239407	0.307629	2.18941	3.12996	NFIL3;ESR1
																Ammon's horn	1/301	0.479392	0.481878	1.56008	1.14703	TCF4										alar plate of evaginated telencephalic vesicle	2/301	0.239407	0.307629	2.18941	3.12996	EOMES;EGR3
																Anterior cingulate area, dorsal part, layer 2/3	1/301	0.479392	0.481878	1.56008	1.14703	ERG										alar plate of p1	2/301	0.239407	0.307629	2.18941	3.12996	TCF7L2;SPDEF
																Anterior cingulate area, dorsal part, layer 5	1/301	0.479392	0.481878	1.56008	1.14703	BHLHE40										alar plate of p2 (alar thalamus)	2/301	0.239407	0.307629	2.18941	3.12996	TCF7L2;LEF1
																Anterior cingulate area, dorsal part, layer 6b	1/301	0.479392	0.481878	1.56008	1.14703	GATA2										anteroventral part of alar thalamus	2/301	0.239407	0.307629	2.18941	3.12996	TCF7L2;LEF1
																Anterior cingulate area, ventral part, layer 1	1/301	0.479392	0.481878	1.56008	1.14703	KLF4										basal part of terminal hypothalamus	2/301	0.239407	0.307629	2.18941	3.12996	AR;ESR1
																Anterior olfactory nucleus	1/301	0.479392	0.481878	1.56008	1.14703	HNF1A										basal plate of m1	2/301	0.239407	0.307629	2.18941	3.12996	FOXA1;FOXA2
																Anterior olfactory nucleus, lateral part	1/301	0.479392	0.481878	1.56008	1.14703	HNF1A										basolateral amygdaloid nucleus, posterior part	2/301	0.239407	0.307629	2.18941	3.12996	WT1;NR2F1
																Anterolateral visual area	1/301	0.479392	0.481878	1.56008	1.14703	NR3C1										bed nucleus of the stria terminalis, laterocentral division	2/301	0.239407	0.307629	2.18941	3.12996	SOX2;EGR3
																Anterolateral visual area, layer 6a	1/301	0.479392	0.481878	1.56008	1.14703	NR3C1										caudal secondary prosencephalon	2/301	0.239407	0.307629	2.18941	3.12996	EOMES;EGR3
																Anterolateral visual area, layer 6b	1/301	0.479392	0.481878	1.56008	1.14703	NR3C1										central part of VMH	2/301	0.239407	0.307629	2.18941	3.12996	AR;ESR1
																Anteromedial visual area	1/301	0.479392	0.481878	1.56008	1.14703	SOX17										central subpallium (classic basal ganglia)	2/301	0.239407	0.307629	2.18941	3.12996	EGR3;FOXO1
																Anteromedial visual area, layer 4	1/301	0.479392	0.481878	1.56008	1.14703	SOX17										cerebellar nuclei of CbV	2/301	0.239407	0.307629	2.18941	3.12996	NEUROD1;HNF4G
																Arcuate hypothalamic nucleus	1/301	0.479392	0.481878	1.56008	1.14703	ESR1										colliculus superior	2/301	0.239407	0.307629	2.18941	3.12996	LEF1;OTX2
																Bed nuclei of the stria terminalis, anterior division, fusiform nucleus	1/301	0.479392	0.481878	1.56008	1.14703	AR										core of T-DMH	2/301	0.239407	0.307629	2.18941	3.12996	AR;ESR1
																Bed nuclei of the stria terminalis, anterior division, oval nucleus	1/301	0.479392	0.481878	1.56008	1.14703	SOX2										core part of DTg	2/301	0.239407	0.307629	2.18941	3.12996	SOX2;FOXA2
																Bed nuclei of the stria terminalis, anterior division, rhomboid nucleus	1/301	0.479392	0.481878	1.56008	1.14703	SOX2										core part of the anterobasal nucleus	2/301	0.239407	0.307629	2.18941	3.12996	AR;ESR1
																Caudoputamen	1/301	0.479392	0.481878	1.56008	1.14703	GATA3										cortex of cerebellar vermis	2/301	0.239407	0.307629	2.18941	3.12996	NEUROD1;MAX
																Cerebellar nuclei	1/301	0.479392	0.481878	1.56008	1.14703	NEUROD1										diagonal part of septum	2/301	0.239407	0.307629	2.18941	3.12996	REST;ESR1
																Cerebral nuclei	1/301	0.479392	0.481878	1.56008	1.14703	GATA3										diencephalon	2/301	0.239407	0.307629	2.18941	3.12996	TCF7L2;LEF1
																Cerebrum	1/301	0.479392	0.481878	1.56008	1.14703	EOMES										dorsal endopiriform nucleus	2/301	0.239407	0.307629	2.18941	3.12996	WT1;FOXA2
																Cortical amygdalar area, anterior part	1/301	0.479392	0.481878	1.56008	1.14703	GATA3										dorsal lateral geniculate nucleus	2/301	0.239407	0.307629	2.18941	3.12996	TCF7L2;LEF1
																Cortical amygdalar area, anterior part, layer 2	1/301	0.479392	0.481878	1.56008	1.14703	GATA3										dorsal pallium/isocortex	2/301	0.239407	0.307629	2.18941	3.12996	EGR3;BHLHE40
																Cortical amygdalar area, posterior part, lateral zone, layer 2	1/301	0.479392	0.481878	1.56008	1.14703	ERF										dorsal part of CoP	2/301	0.239407	0.307629	2.18941	3.12996	TCF7L2;SPDEF
																Dentate gyrus, polymorph layer	1/301	0.479392	0.481878	1.56008	1.14703	NFE2										dorsal part of JcP	2/301	0.239407	0.307629	2.18941	3.12996	TCF7L2;SPDEF
																Diagonal band nucleus	1/301	0.479392	0.481878	1.56008	1.14703	ESR1										dorsal peduncular cortex, intermediate part	2/301	0.239407	0.307629	2.18941	3.12996	GATA2;GATA1
																Dopaminergic A13 group	1/301	0.479392	0.481878	1.56008	1.14703	ERG										dorsal periolivary nucleus	2/301	0.239407	0.307629	2.18941	3.12996	MYC;STAT3
																Dorsal cochlear nucleus	1/301	0.479392	0.481878	1.56008	1.14703	OTX2										dorsal septopreoptic nucleus	2/301	0.239407	0.307629	2.18941	3.12996	AR;ESR1
																Dorsal motor nucleus of the vagus nerve	1/301	0.479392	0.481878	1.56008	1.14703	RUNX1										dorsal spiriform nucleus	2/301	0.239407	0.307629	2.18941	3.12996	TCF7L2;SPDEF
																Dorsal peduncular area, layer 2/3	1/301	0.479392	0.481878	1.56008	1.14703	SOX17										dorsal subnucleus of MG	2/301	0.239407	0.307629	2.18941	3.12996	TCF7L2;LEF1
																Ectorhinal area/Layer 6a	1/301	0.479392	0.481878	1.56008	1.14703	NR3C1										dorsal terminal nucleus of the accessory optic tract	2/301	0.239407	0.307629	2.18941	3.12996	TCF7L2;MNT
																Endopiriform nucleus	1/301	0.479392	0.481878	1.56008	1.14703	FLI1										dorsal tier of thalamus	2/301	0.239407	0.307629	2.18941	3.12996	TCF7L2;LEF1
																Endopiriform nucleus, dorsal part	1/301	0.479392	0.481878	1.56008	1.14703	FLI1										dorsolateral (non-cerebellar) part of isA	2/301	0.239407	0.307629	2.18941	3.12996	NEUROD1;EBF3
																External cuneate nucleus	1/301	0.479392	0.481878	1.56008	1.14703	OTX2										dorsolateral IC periaqueductal gray	2/301	0.239407	0.307629	2.18941	3.12996	TCF7L2;LEF1
																Fastigial nucleus	1/301	0.479392	0.481878	1.56008	1.14703	NEUROD1										dorsolateral part of Med	2/301	0.239407	0.307629	2.18941	3.12996	NEUROD1;HNF4G
																Field CA2, pyramidal layer	1/301	0.479392	0.481878	1.56008	1.14703	TCF4										dorsomedial nucleus, terminal part	2/301	0.239407	0.307629	2.18941	3.12996	AR;ESR1
																Fields of Forel	1/301	0.479392	0.481878	1.56008	1.14703	HNF1B										dorsomedial part of VMH	2/301	0.239407	0.307629	2.18941	3.12996	CDX2;ESR1
																Frontal pole, cerebral cortex	1/301	0.479392	0.481878	1.56008	1.14703	EOMES										first (dorsal) preoptic domain	2/301	0.239407	0.307629	2.18941	3.12996	AR;ESR1
																Frontal pole, layer 1	1/301	0.479392	0.481878	1.56008	1.14703	EOMES										hippocampus (cortex Ammonis)	2/301	0.239407	0.307629	2.18941	3.12996	AR;TCF4
																Frontal pole, layer 2/3	1/301	0.479392	0.481878	1.56008	1.14703	EOMES										insular cortex	2/301	0.239407	0.307629	2.18941	3.12996	HNF1A;FLI1
																Fundus of striatum	1/301	0.479392	0.481878	1.56008	1.14703	GATA3										intergeniculate leaflet	2/301	0.239407	0.307629	2.18941	3.12996	TCF7L2;LEF1
																Gustatory areas	1/301	0.479392	0.481878	1.56008	1.14703	HNF1A										intermediate gray layer of SC	2/301	0.239407	0.307629	2.18941	3.12996	LEF1;OTX2
																Gustatory areas, layer 1	1/301	0.479392	0.481878	1.56008	1.14703	HNF1A										intermediate isthmic part of the dorsal raphe nucleus	2/301	0.239407	0.307629	2.18941	3.12996	GATA3;RUNX1
																Gustatory areas, layer 2/3	1/301	0.479392	0.481878	1.56008	1.14703	HNF1A										intermediate part of StrSe	2/301	0.239407	0.307629	2.18941	3.12996	SOX2;REST
																Gustatory areas, layer 5	1/301	0.479392	0.481878	1.56008	1.14703	RUNX1										intermediate part of r4B	2/301	0.239407	0.307629	2.18941	3.12996	HOXB13;KLF1
																Hippocampal formation	1/301	0.479392	0.481878	1.56008	1.14703	TCF4										intermediate part of r5B	2/301	0.239407	0.307629	2.18941	3.12996	ELF4;KLF1
																Hypothalamic lateral zone	1/301	0.479392	0.481878	1.56008	1.14703	ESR1										intermediate part of r7B	2/301	0.239407	0.307629	2.18941	3.12996	ELF4;FOXA3
																Infralimbic area	1/301	0.479392	0.481878	1.56008	1.14703	SOX17										intermediate part of r8B	2/301	0.239407	0.307629	2.18941	3.12996	ELF4;NFE2L2
																Infralimbic area, layer 2/3	1/301	0.479392	0.481878	1.56008	1.14703	HNF1A										intermediate part of the arcuate nucleus	2/301	0.239407	0.307629	2.18941	3.12996	STAT3;ESR1
																Infralimbic area, layer 6a	1/301	0.479392	0.481878	1.56008	1.14703	GATA2										intermediate stratum of CoPD	2/301	0.239407	0.307629	2.18941	3.12996	TCF7L2;SPDEF
																Infralimbic area, layer 6b	1/301	0.479392	0.481878	1.56008	1.14703	GATA2										intermediate stratum of DTTh	2/301	0.239407	0.307629	2.18941	3.12996	TCF7L2;LEF1
																Isocortex	1/301	0.479392	0.481878	1.56008	1.14703	BHLHE40										intermediate stratum of JcPD	2/301	0.239407	0.307629	2.18941	3.12996	TCF7L2;SPDEF
																Lateral amygdalar nucleus	1/301	0.479392	0.481878	1.56008	1.14703	OTX2										intermediate stratum of LAP	2/301	0.239407	0.307629	2.18941	3.12996	WT1;NR2F1
																Lateral hypothalamic area	1/301	0.479392	0.481878	1.56008	1.14703	ESR1										intermediate stratum of OB	2/301	0.239407	0.307629	2.18941	3.12996	EOMES;MITF
																Lateral preoptic area	1/301	0.479392	0.481878	1.56008	1.14703	ESR1										intermediate stratum of PO1	2/301	0.239407	0.307629	2.18941	3.12996	AR;ESR1
																Lateral septal complex	1/301	0.479392	0.481878	1.56008	1.14703	SOX2										intermediate stratum of Str	2/301	0.239407	0.307629	2.18941	3.12996	EGR3;FOXO1
																Lateral septal nucleus	1/301	0.479392	0.481878	1.56008	1.14703	SOX2										intermediate stratum of TPaA	2/301	0.239407	0.307629	2.18941	3.12996	ERG;ESR1
																Lateral septal nucleus, caudal (caudodorsal) part	1/301	0.479392	0.481878	1.56008	1.14703	SOX2										intermediate stratum of TTe	2/301	0.239407	0.307629	2.18941	3.12996	GATA2;GATA1
																Lateral septal nucleus, rostral (rostroventral) part	1/301	0.479392	0.481878	1.56008	1.14703	SOX2										intermediate stratum of VTTh	2/301	0.239407	0.307629	2.18941	3.12996	TCF7L2;LEF1
																Lateral terminal nucleus of the accessory optic tract	1/301	0.479392	0.481878	1.56008	1.14703	FLI1										intermediate stratum of cerebellar vermis	2/301	0.239407	0.307629	2.18941	3.12996	NEUROD1;HNF4G
																Lateral vestibular nucleus	1/301	0.479392	0.481878	1.56008	1.14703	SOX17										intermediate stratum of isBL	2/301	0.239407	0.307629	2.18941	3.12996	EBF3;HNF1A
																Lateral visual area	1/301	0.479392	0.481878	1.56008	1.14703	NR3C1										intermediate stratum of isLim	2/301	0.239407	0.307629	2.18941	3.12996	GATA4;HNF1A
																Lateral visual area, layer 6a	1/301	0.479392	0.481878	1.56008	1.14703	NR3C1										intermediate stratum of m1AL	2/301	0.239407	0.307629	2.18941	3.12996	TCF7L2;GATA4
																Lobule III	1/301	0.479392	0.481878	1.56008	1.14703	NEUROD1										intermediate stratum of m2ADL	2/301	0.239407	0.307629	2.18941	3.12996	TCF7L2;GATA4
																Lobule III, granular layer	1/301	0.479392	0.481878	1.56008	1.14703	NEUROD1										intermediate stratum of m2B	2/301	0.239407	0.307629	2.18941	3.12996	EBF3;FOXA2
																Lobule III, molecular layer	1/301	0.479392	0.481878	1.56008	1.14703	NEUROD1										intermediate stratum of m2Lim	2/301	0.239407	0.307629	2.18941	3.12996	WT1;GATA4
																Main olfactory bulb	1/301	0.479392	0.481878	1.56008	1.14703	EOMES										intermediate stratum of p2Lim	2/301	0.239407	0.307629	2.18941	3.12996	TCF7L2;HNF4G
																Main olfactory bulb, glomerular layer	1/301	0.479392	0.481878	1.56008	1.14703	EOMES										intermediate stratum of r1Tr	2/301	0.239407	0.307629	2.18941	3.12996	PHOX2B;SPDEF
																Main olfactory bulb, granule layer	1/301	0.479392	0.481878	1.56008	1.14703	EOMES										intermediate stratum of r2BM	2/301	0.239407	0.307629	2.18941	3.12996	ELF4;RUNX1
																Main olfactory bulb, inner plexiform layer	1/301	0.479392	0.481878	1.56008	1.14703	EOMES										intermediate stratum of r2Ve	2/301	0.239407	0.307629	2.18941	3.12996	SOX17;OTX2
																Main olfactory bulb, mitral layer	1/301	0.479392	0.481878	1.56008	1.14703	EOMES										intermediate stratum of r3Ve	2/301	0.239407	0.307629	2.18941	3.12996	GATA1;PHOX2B
																Main olfactory bulb, outer plexiform layer	1/301	0.479392	0.481878	1.56008	1.14703	EOMES										intermediate stratum of r4Lim	2/301	0.239407	0.307629	2.18941	3.12996	STAT3;PHOX2B
																Major island of Calleja	1/301	0.479392	0.481878	1.56008	1.14703	ERG										intermediate stratum of r4Tr	2/301	0.239407	0.307629	2.18941	3.12996	STAT3;PHOX2B
																Medial habenula	1/301	0.479392	0.481878	1.56008	1.14703	OTX2										intermediate stratum of r5Lim	2/301	0.239407	0.307629	2.18941	3.12996	STAT3;PHOX2B
																Medial vestibular nucleus	1/301	0.479392	0.481878	1.56008	1.14703	KLF1										intermediate stratum of r7BM	2/301	0.239407	0.307629	2.18941	3.12996	ELF4;RUNX1
																Midbrain raphe nuclei	1/301	0.479392	0.481878	1.56008	1.14703	FOXA1										intermediate stratum of r7Tr	2/301	0.239407	0.307629	2.18941	3.12996	MYC;KLF1
																Nodulus (X), molecular layer	1/301	0.479392	0.481878	1.56008	1.14703	OTX2										intermediate stratum of the PBC	2/301	0.239407	0.307629	2.18941	3.12996	NEUROD1;HNF4G
																Nucleus of the lateral olfactory tract, molecular layer	1/301	0.479392	0.481878	1.56008	1.14703	GATA3										internal cortical nucleus of inferior colliculus	2/301	0.239407	0.307629	2.18941	3.12996	FOXA1;TCF7L2
																Nucleus of the solitary tract, commissural part	1/301	0.479392	0.481878	1.56008	1.14703	RUNX1										internal granular layer of CbVCx	2/301	0.239407	0.307629	2.18941	3.12996	NEUROD1;MAX
																Nucleus of the solitary tract, gelatinous part	1/301	0.479392	0.481878	1.56008	1.14703	OTX2										isthmic alar plate	2/301	0.239407	0.307629	2.18941	3.12996	NEUROD1;MAX
																Nucleus prepositus	1/301	0.479392	0.481878	1.56008	1.14703	OTX2										isthmic basal plate	2/301	0.239407	0.307629	2.18941	3.12996	FOXA1;EBF3
																Nucleus sagulum	1/301	0.479392	0.481878	1.56008	1.14703	GATA3										isthmic liminal part of the periaqueductal gray	2/301	0.239407	0.307629	2.18941	3.12996	EBF3;GATA3
																OB glomerular layer	1/301	0.479392	0.481878	1.56008	1.14703	EOMES										isthmic liminal reticular area	2/301	0.239407	0.307629	2.18941	3.12996	WT1;HNF1A
																OB granular layer	1/301	0.479392	0.481878	1.56008	1.14703	EOMES										isthmic part of basolateral isthmic reticular formation	2/301	0.239407	0.307629	2.18941	3.12996	EBF3;HNF1A
																OB inner plexiform layer	1/301	0.479392	0.481878	1.56008	1.14703	EOMES										isthmic part of mesencephalic trigeminal nucleus	2/301	0.239407	0.307629	2.18941	3.12996	HNF4G;HNF1A
																OB mitral cell layer	1/301	0.479392	0.481878	1.56008	1.14703	EOMES										isthmic part of the intermediate lateral lemniscal nucleus	2/301	0.239407	0.307629	2.18941	3.12996	NEUROD1;GATA4
																OB olfactory fiber layer	1/301	0.479392	0.481878	1.56008	1.14703	EOMES										isthmic portion of paranigral nucleus	2/301	0.239407	0.307629	2.18941	3.12996	FOXA1;FOXA2
																OB outer plexiform layer	1/301	0.479392	0.481878	1.56008	1.14703	EOMES										isthmic roof plate	2/301	0.239407	0.307629	2.18941	3.12996	NEUROD1;FOXA2
																Olfactory areas	1/301	0.479392	0.481878	1.56008	1.14703	EOMES										isthmic vestibulocerebellar nucleus	2/301	0.239407	0.307629	2.18941	3.12996	HNF4G;HOXB13
																Orbital area, lateral part, layer 5	1/301	0.479392	0.481878	1.56008	1.14703	FLI1										juxtacommissural pretectal domain	2/301	0.239407	0.307629	2.18941	3.12996	TCF7L2;SPDEF
																Orbital area, medial part, layer 1	1/301	0.479392	0.481878	1.56008	1.14703	SOX17										lateral part of JcP	2/301	0.239407	0.307629	2.18941	3.12996	TCF7L2;SPDEF
																Orbital area, ventrolateral part, layer 6a	1/301	0.479392	0.481878	1.56008	1.14703	GATA2										lateral part of MPO	2/301	0.239407	0.307629	2.18941	3.12996	AR;ESR1
																Pallidum, ventral region	1/301	0.479392	0.481878	1.56008	1.14703	GATA3										lateral part of Med	2/301	0.239407	0.307629	2.18941	3.12996	SOX13;HOXB13
																Parabrachial nucleus, lateral division, central lateral part	1/301	0.479392	0.481878	1.56008	1.14703	NEUROD1										lateral part of PcP	2/301	0.239407	0.307629	2.18941	3.12996	TCF7L2;LEF1
																Parasubiculum, layer 1	1/301	0.479392	0.481878	1.56008	1.14703	FOXA1										lateral part of alar p2	2/301	0.239407	0.307629	2.18941	3.12996	TCF7L2;LEF1
																Paraventricular hypothalamic nucleus, parvicellular division, medial parvicellular part, dorsal zone	1/301	0.479392	0.481878	1.56008	1.14703	ESR1										lateral part of r2B	2/301	0.239407	0.307629	2.18941	3.12996	PHOX2B;KLF1
																Parvicellular reticular nucleus	1/301	0.479392	0.481878	1.56008	1.14703	AR										lateral part of r5B	2/301	0.239407	0.307629	2.18941	3.12996	MYC;KLF1
																PcPV part of the periaqueductal gray	1/301	0.479392	0.481878	1.56008	1.14703	TCF7L2										lateral part of the isB	2/301	0.239407	0.307629	2.18941	3.12996	FOXA1;EBF3
																Periventricular zone	1/301	0.479392	0.481878	1.56008	1.14703	ESR1										lateral preoptic area, PO1 part	2/301	0.239407	0.307629	2.18941	3.12996	AR;ESR1
																Piriform area, pyramidal layer	1/301	0.479392	0.481878	1.56008	1.14703	FLI1										lateral septal nucleus, intermedio-dorsal part	2/301	0.239407	0.307629	2.18941	3.12996	SOX2;REST
																Piriform-amygdalar area	1/301	0.479392	0.481878	1.56008	1.14703	ERF										lateral terminal nucleus of the accessory optic tract, lateral part	2/301	0.239407	0.307629	2.18941	3.12996	TCF7L2;MNT
																Piriform-amygdalar area, molecular layer	1/301	0.479392	0.481878	1.56008	1.14703	ERF										lateral trapezoid nucleus	2/301	0.239407	0.307629	2.18941	3.12996	ELF4;FOXA2
																Piriform-amygdalar area, polymorph layer	1/301	0.479392	0.481878	1.56008	1.14703	ESR1										lateral tuberal nucleus	2/301	0.239407	0.307629	2.18941	3.12996	SOX17;HNF1A
																Piriform-amygdalar area, pyramidal layer	1/301	0.479392	0.481878	1.56008	1.14703	ERF										lateropallial amygdalopiriform area	2/301	0.239407	0.307629	2.18941	3.12996	WT1;NR2F1
																Pontine gray	1/301	0.479392	0.481878	1.56008	1.14703	VDR										laterostriatal stripe	2/301	0.239407	0.307629	2.18941	3.12996	CDX2;PHOX2B
																Posterior parietal association areas, layer 6a	1/301	0.479392	0.481878	1.56008	1.14703	BHLHE40										layer 1 of AOV cortex	2/301	0.239407	0.307629	2.18941	3.12996	EOMES;HNF4G
																Posterior parietal association areas, layer 6b	1/301	0.479392	0.481878	1.56008	1.14703	NR3C1										layer 1 of OCx	2/301	0.239407	0.307629	2.18941	3.12996	EGR3;HNF1A
																Posterolateral visual area, layer 4	1/301	0.479392	0.481878	1.56008	1.14703	BHLHE40										layer 1 of PaS	2/301	0.239407	0.307629	2.18941	3.12996	ELF1;POU5F1
																Postsubiculum	1/301	0.479392	0.481878	1.56008	1.14703	GATA3										layer 2 of OCx	2/301	0.239407	0.307629	2.18941	3.12996	EGR3;NR3C1
																Postsubiculum, layer 1	1/301	0.479392	0.481878	1.56008	1.14703	SOX17										layer 3 of LOT	2/301	0.239407	0.307629	2.18941	3.12996	SOX2;FLI1
																Postsubiculum, layer 2	1/301	0.479392	0.481878	1.56008	1.14703	GATA3										liminal alar domain of m2	2/301	0.239407	0.307629	2.18941	3.12996	EBF3;GATA4
																Prelimbic area, layer 6b	1/301	0.479392	0.481878	1.56008	1.14703	GATA2										liminal part of alar p1	2/301	0.239407	0.307629	2.18941	3.12996	TCF7L2;EBF3
																Primary motor area, Layer 1	1/301	0.479392	0.481878	1.56008	1.14703	POU5F1										liminal part of r4 alar plate	2/301	0.239407	0.307629	2.18941	3.12996	STAT3;PHOX2B
																Primary somatosensory area	1/301	0.479392	0.481878	1.56008	1.14703	BHLHE40										liminal part of the r5 alar plate	2/301	0.239407	0.307629	2.18941	3.12996	STAT3;PHOX2B
																Primary somatosensory area, barrel field, layer 5	1/301	0.479392	0.481878	1.56008	1.14703	BHLHE40										liminal periaqueductal gray of m2	2/301	0.239407	0.307629	2.18941	3.12996	TCF7L2;EBF3
																Primary somatosensory area, lower limb, layer 1	1/301	0.479392	0.481878	1.56008	1.14703	NR2F6										m1 (rostral) midbrain tegmentum	2/301	0.239407	0.307629	2.18941	3.12996	FOXA1;FOXA2
																Primary somatosensory area, lower limb, layer 5	1/301	0.479392	0.481878	1.56008	1.14703	BHLHE40										m1 part of paranigral nucleus	2/301	0.239407	0.307629	2.18941	3.12996	FOXA1;FOXA2
																Primary somatosensory area, mouth, layer 1	1/301	0.479392	0.481878	1.56008	1.14703	NR2F6										m1B part of the periaqueductal gray	2/301	0.239407	0.307629	2.18941	3.12996	FOXA1;REST
																Primary somatosensory area, mouth, layer 5	1/301	0.479392	0.481878	1.56008	1.14703	BHLHE40										m2 alar plate	2/301	0.239407	0.307629	2.18941	3.12996	TCF7L2;GATA4
																Primary somatosensory area, trunk	1/301	0.479392	0.481878	1.56008	1.14703	BHLHE40										m2 part of paranigral nucleus	2/301	0.239407	0.307629	2.18941	3.12996	FOXA1;REST
																Primary somatosensory area, trunk, layer 2/3	1/301	0.479392	0.481878	1.56008	1.14703	NR2F6										m2 part of pararubral nucleus	2/301	0.239407	0.307629	2.18941	3.12996	FOXA1;FOXA2
																Primary somatosensory area, trunk, layer 5	1/301	0.479392	0.481878	1.56008	1.14703	BHLHE40										magnocellular diagonal band nucleus	2/301	0.239407	0.307629	2.18941	3.12996	SOX2;RUNX1
																Primary somatosensory area, trunk, layer 6a	1/301	0.479392	0.481878	1.56008	1.14703	BHLHE40										mammillary part of PHyB	2/301	0.239407	0.307629	2.18941	3.12996	FOXA1;NFIL3
																Primary somatosensory area, unassigned, layer 4	1/301	0.479392	0.481878	1.56008	1.14703	POU5F1										mantle zone of CA	2/301	0.239407	0.307629	2.18941	3.12996	AR;TCF4
																Primary somatosensory area, unassigned, layer 5	1/301	0.479392	0.481878	1.56008	1.14703	BHLHE40										mantle zone of CoPD	2/301	0.239407	0.307629	2.18941	3.12996	TCF7L2;SPDEF
																Primary somatosensory area, upper limb, layer 5	1/301	0.479392	0.481878	1.56008	1.14703	BHLHE40										mantle zone of CoPV	2/301	0.239407	0.307629	2.18941	3.12996	TCF7L2;OTX2
																Primary somatosensory area, upper limb, layer 6a	1/301	0.479392	0.481878	1.56008	1.14703	BHLHE40										mantle zone of DTTh	2/301	0.239407	0.307629	2.18941	3.12996	TCF7L2;LEF1
																Primary somatosensory area, upper limb, layer 6b	1/301	0.479392	0.481878	1.56008	1.14703	NR3C1										mantle zone of DgSe	2/301	0.239407	0.307629	2.18941	3.12996	REST;ESR1
																Primary visual area, layer 2/3	1/301	0.479392	0.481878	1.56008	1.14703	ERF										mantle zone of InsCx	2/301	0.239407	0.307629	2.18941	3.12996	HNF1A;FLI1
																Pyramus (VIII)	1/301	0.479392	0.481878	1.56008	1.14703	NEUROD1										mantle zone of JcPD	2/301	0.239407	0.307629	2.18941	3.12996	TCF7L2;SPDEF
																Pyramus (VIII), granular layer	1/301	0.479392	0.481878	1.56008	1.14703	NEUROD1										mantle zone of JcPL	2/301	0.239407	0.307629	2.18941	3.12996	TCF7L2;SPDEF
																Pyramus (VIII), molecular layer	1/301	0.479392	0.481878	1.56008	1.14703	NEUROD1										mantle zone of LAP	2/301	0.239407	0.307629	2.18941	3.12996	WT1;NR2F1
																Retrochiasmatic area	1/301	0.479392	0.481878	1.56008	1.14703	AR										mantle zone of OB	2/301	0.239407	0.307629	2.18941	3.12996	EOMES;MITF
																Retrosplenial area, dorsal part, layer 1	1/301	0.479392	0.481878	1.56008	1.14703	HNF1A										mantle zone of PO1	2/301	0.239407	0.307629	2.18941	3.12996	AR;ESR1
																Retrosplenial area, lateral agranular part	1/301	0.479392	0.481878	1.56008	1.14703	SOX17										mantle zone of PO2	2/301	0.239407	0.307629	2.18941	3.12996	AR;ESR1
																Retrosplenial area, lateral agranular part, layer 1	1/301	0.479392	0.481878	1.56008	1.14703	HNF1A										mantle zone of PcPL	2/301	0.239407	0.307629	2.18941	3.12996	TCF7L2;LEF1
																Retrosplenial area, lateral agranular part, layer 2/3	1/301	0.479392	0.481878	1.56008	1.14703	SOX17										mantle zone of RMa	2/301	0.239407	0.307629	2.18941	3.12996	FOXA1;NFIL3
																Retrosplenial area, ventral part, layer 2	1/301	0.479392	0.481878	1.56008	1.14703	ERG										mantle zone of SC	2/301	0.239407	0.307629	2.18941	3.12996	LEF1;OTX2
																Retrosplenial area, ventral part, layer 6b	1/301	0.479392	0.481878	1.56008	1.14703	ETV5										mantle zone of Str	2/301	0.239407	0.307629	2.18941	3.12996	EGR3;FOXO1
																Spinal nucleus of the trigeminal, oral part, middle dorsomedial part, ventral zone	1/301	0.479392	0.481878	1.56008	1.14703	GATA3										mantle zone of VAP	2/301	0.239407	0.307629	2.18941	3.12996	NR2F1;ESR1
																Striatum	1/301	0.479392	0.481878	1.56008	1.14703	GATA3										mantle zone of VTTh	2/301	0.239407	0.307629	2.18941	3.12996	TCF7L2;LEF1
																Striatum dorsal region	1/301	0.479392	0.481878	1.56008	1.14703	GATA3										mantle zone of isBL	2/301	0.239407	0.307629	2.18941	3.12996	EBF3;HNF1A
																Subceruleus nucleus	1/301	0.479392	0.481878	1.56008	1.14703	KLF1										mantle zone of isBM	2/301	0.239407	0.307629	2.18941	3.12996	FOXA1;RUNX1
																Subiculum, dorsal part, stratum radiatum	1/301	0.479392	0.481878	1.56008	1.14703	BHLHE40										mantle zone of m1B	2/301	0.239407	0.307629	2.18941	3.12996	FOXA1;FOXA2
																Subiculum, ventral part, stratum radiatum	1/301	0.479392	0.481878	1.56008	1.14703	AR										mantle zone of m2Lim	2/301	0.239407	0.307629	2.18941	3.12996	EBF3;GATA4
																Sublaterodorsal nucleus	1/301	0.479392	0.481878	1.56008	1.14703	KLF1										mantle zone of p1Lim	2/301	0.239407	0.307629	2.18941	3.12996	TCF7L2;EBF3
																Substantia innominata	1/301	0.479392	0.481878	1.56008	1.14703	GATA3										mantle zone of r1Tr	2/301	0.239407	0.307629	2.18941	3.12996	PHOX2B;SPDEF
																Substantia nigra, reticular part	1/301	0.479392	0.481878	1.56008	1.14703	FOXA1										mantle zone of r2BL	2/301	0.239407	0.307629	2.18941	3.12996	PHOX2B;KLF1
																Superior colliculus, zonal layer	1/301	0.479392	0.481878	1.56008	1.14703	SPDEF										mantle zone of r2BM	2/301	0.239407	0.307629	2.18941	3.12996	ELF4;RUNX1
																Superior olivary complex, lateral part	1/301	0.479392	0.481878	1.56008	1.14703	AR										mantle zone of r2Tr	2/301	0.239407	0.307629	2.18941	3.12996	PHOX2B;SPDEF
																Supplemental somatosensory area	1/301	0.479392	0.481878	1.56008	1.14703	RUNX1										mantle zone of r2Ve	2/301	0.239407	0.307629	2.18941	3.12996	SOX17;OTX2
																Supplemental somatosensory area, layer 6a	1/301	0.479392	0.481878	1.56008	1.14703	RUNX1										mantle zone of r3Co	2/301	0.239407	0.307629	2.18941	3.12996	NFE2;OTX2
																Supplemental somatosensory area, layer 6b	1/301	0.479392	0.481878	1.56008	1.14703	RUNX1										mantle zone of r4BI	2/301	0.239407	0.307629	2.18941	3.12996	HOXB13;KLF1
																Supramammillary nucleus	1/301	0.479392	0.481878	1.56008	1.14703	FOXA1										mantle zone of r4Lim	2/301	0.239407	0.307629	2.18941	3.12996	STAT3;PHOX2B
																Supramammillary nucleus, medial part	1/301	0.479392	0.481878	1.56008	1.14703	FOXA1										mantle zone of r4Tr	2/301	0.239407	0.307629	2.18941	3.12996	STAT3;PHOX2B
																Supratrigeminal nucleus	1/301	0.479392	0.481878	1.56008	1.14703	SPDEF										mantle zone of r5BI	2/301	0.239407	0.307629	2.18941	3.12996	ELF4;KLF1
																Taenia tecta, dorsal part	1/301	0.479392	0.481878	1.56008	1.14703	SOX17										mantle zone of r5BL	2/301	0.239407	0.307629	2.18941	3.12996	MYC;KLF1
																Taenia tecta, dorsal part, layer 1	1/301	0.479392	0.481878	1.56008	1.14703	SOX17										mantle zone of r5Co	2/301	0.239407	0.307629	2.18941	3.12996	SOX17;OTX2
																Taenia tecta, dorsal part, layer 2	1/301	0.479392	0.481878	1.56008	1.14703	SOX17										mantle zone of r5Lim	2/301	0.239407	0.307629	2.18941	3.12996	STAT3;PHOX2B
																Taenia tecta, ventral part, layer 1	1/301	0.479392	0.481878	1.56008	1.14703	SOX17										mantle zone of r6Co	2/301	0.239407	0.307629	2.18941	3.12996	OTX2;FOXA2
																Taenia tecta, ventral part, layer 3	1/301	0.479392	0.481878	1.56008	1.14703	GATA2										mantle zone of r6Tr	2/301	0.239407	0.307629	2.18941	3.12996	CDX2;PHOX2B
																Temporal association areas	1/301	0.479392	0.481878	1.56008	1.14703	NR3C1										mantle zone of r7BI	2/301	0.239407	0.307629	2.18941	3.12996	ELF4;FOXA3
																Temporal association areas, layer 5	1/301	0.479392	0.481878	1.56008	1.14703	NR3C1										mantle zone of r7BM	2/301	0.239407	0.307629	2.18941	3.12996	ELF4;RUNX1
																Temporal association areas, layer 6a	1/301	0.479392	0.481878	1.56008	1.14703	NR3C1										mantle zone of r8BI	2/301	0.239407	0.307629	2.18941	3.12996	ELF4;NFE2L2
																Tuberomammillary nucleus	1/301	0.479392	0.481878	1.56008	1.14703	ESR1										mantle zone of the IG	2/301	0.239407	0.307629	2.18941	3.12996	SMAD2;PRDM1
																Ventral part of the lateral geniculate complex	1/301	0.479392	0.481878	1.56008	1.14703	LEF1										medial (fastigial) cerebellar nucleus	2/301	0.239407	0.307629	2.18941	3.12996	NEUROD1;HNF4G
																Ventromedial hypothalamic nucleus, ventrolateral part	1/301	0.479392	0.481878	1.56008	1.14703	AR										medial (main) part of Med	2/301	0.239407	0.307629	2.18941	3.12996	HNF4G;KLF1
																Vermal regions	1/301	0.479392	0.481878	1.56008	1.14703	NEUROD1										medial basal reticular formation of m1	2/301	0.239407	0.307629	2.18941	3.12996	FOXA1;EBF3
																abducens motor nucleus	1/301	0.479392	0.481878	1.56008	1.14703	HNF1A										medial geniculate nucleus	2/301	0.239407	0.307629	2.18941	3.12996	TCF7L2;LEF1
																accessory entopeduncular nucleus (post-migratory)	1/301	0.479392	0.481878	1.56008	1.14703	NFE2L2										medial parabrachial nucleus	2/301	0.239407	0.307629	2.18941	3.12996	NEUROD1;HNF4G
																accumbens nucleus, core domain	1/301	0.479392	0.481878	1.56008	1.14703	SPDEF										medial part of r2B	2/301	0.239407	0.307629	2.18941	3.12996	ELF4;RUNX1
																accumbens nucleus, shell domain	1/301	0.479392	0.481878	1.56008	1.14703	GATA2										medial part of r7B	2/301	0.239407	0.307629	2.18941	3.12996	ELF4;RUNX1
																alar part of peduncular hypothalamus	1/301	0.479392	0.481878	1.56008	1.14703	ESR1										medial part of the isB	2/301	0.239407	0.307629	2.18941	3.12996	FOXA1;RUNX1
																alar part of terminal hypothalamus	1/301	0.479392	0.481878	1.56008	1.14703	ESR1										medial tuberal nucleus	2/301	0.239407	0.307629	2.18941	3.12996	SMAD2;AR
																alar plate of evaginated telencephalic vesicle	1/301	0.479392	0.481878	1.56008	1.14703	EOMES										molecular layer of CbVCx	2/301	0.239407	0.307629	2.18941	3.12996	NEUROD1;MAX
																anterior cortical amygdaloid area	1/301	0.479392	0.481878	1.56008	1.14703	VDR										molecular layer of S	2/301	0.239407	0.307629	2.18941	3.12996	BHLHE40;ETV5
																anterior digastric muscle trigeminal motor cell group	1/301	0.479392	0.481878	1.56008	1.14703	FOXA2										nucleus of the central acoustic tract	2/301	0.239407	0.307629	2.18941	3.12996	STAT3;PHOX2B
																anterior pretectal nucleus, dorsal superficial part	1/301	0.479392	0.481878	1.56008	1.14703	TCF7L2										nucleus of the inferior collicular brachium, rostral part	2/301	0.239407	0.307629	2.18941	3.12996	TCF7L2;GATA4
																anterior pretectal nucleus, ventral core part	1/301	0.479392	0.481878	1.56008	1.14703	TCF7L2										nucleus sagulum, deep part	2/301	0.239407	0.307629	2.18941	3.12996	TCF7L2;GATA4
																anterior pretectal nucleus, ventral superficial part	1/301	0.479392	0.481878	1.56008	1.14703	TCF7L2										nucleus sagulum, superficial part	2/301	0.239407	0.307629	2.18941	3.12996	NEUROD1;GATA4
																basal peduncular hypothalamus	1/301	0.479392	0.481878	1.56008	1.14703	ESR1										olfactory bulb, principal part	2/301	0.239407	0.307629	2.18941	3.12996	EOMES;MITF
																basolateral amygdaloid nucleus, anterior part	1/301	0.479392	0.481878	1.56008	1.14703	NR2F1										optic fiber layer of SC	2/301	0.239407	0.307629	2.18941	3.12996	LEF1;OTX2
																basolateral amygdaloid nucleus, posterior part	1/301	0.479392	0.481878	1.56008	1.14703	NR2F1										oval paracentral nucleus	2/301	0.239407	0.307629	2.18941	3.12996	TCF7L2;LEF1
																bed nucleus of stria terminalis, lateral amygdaloid division	1/301	0.479392	0.481878	1.56008	1.14703	OTX2										p1 part of parabrachial pigmented nucleus	2/301	0.239407	0.307629	2.18941	3.12996	FOXA1;KLF1
																bed nucleus of the stria terminalis, laterocentral division	1/301	0.479392	0.481878	1.56008	1.14703	SOX2										p1 part of the pararubral nucleus	2/301	0.239407	0.307629	2.18941	3.12996	FOXA1;TCF7L2
																caudal linear (raphe) nucleus	1/301	0.479392	0.481878	1.56008	1.14703	FOXA1										p1 part of the substantia nigra compacta	2/301	0.239407	0.307629	2.18941	3.12996	FOXA1;FOXA2
																caudal secondary prosencephalon	1/301	0.479392	0.481878	1.56008	1.14703	EOMES										p1 portion of the paranigral nucleus	2/301	0.239407	0.307629	2.18941	3.12996	FOXA1;FOXA2
																caudal zona incerta	1/301	0.479392	0.481878	1.56008	1.14703	TCF7L2										p2 part of the zona limitans core population	2/301	0.239407	0.307629	2.18941	3.12996	TCF7L2;LEF1
																cerebellar nuclei of CbV	1/301	0.479392	0.481878	1.56008	1.14703	NEUROD1										p2 portion of the substantia nigra pars compacta	2/301	0.239407	0.307629	2.18941	3.12996	FOXA1;FOXA2
																cingulate cortex	1/301	0.479392	0.481878	1.56008	1.14703	ERG										p3 portion of parabrachial pigmented nucleus	2/301	0.239407	0.307629	2.18941	3.12996	FOXA1;EBF3
																corticoid layer of TuPal	1/301	0.479392	0.481878	1.56008	1.14703	NFE2										p3 portion of paranigral nucleus	2/301	0.239407	0.307629	2.18941	3.12996	FOXA1;PRDM1
																diagonal part of septum	1/301	0.479392	0.481878	1.56008	1.14703	ESR1										p3 portion of the substantia nigra pars reticulata	2/301	0.239407	0.307629	2.18941	3.12996	SMAD2;NFIL3
																dorsal endopiriform nucleus	1/301	0.479392	0.481878	1.56008	1.14703	FOXA2										paralemniscal isthmic area	2/301	0.239407	0.307629	2.18941	3.12996	GATA4;SPDEF
																dorsal nucleus of the lateral lemniscus	1/301	0.479392	0.481878	1.56008	1.14703	NEUROD1										paraventricular nucleus, dorsal part	2/301	0.239407	0.307629	2.18941	3.12996	SOX2;ESR1
																dorsal pallium/isocortex	1/301	0.479392	0.481878	1.56008	1.14703	BHLHE40										paraventricular nucleus, peduncular or principal part	2/301	0.239407	0.307629	2.18941	3.12996	SOX2;ESR1
																dorsal part of PHyB	1/301	0.479392	0.481878	1.56008	1.14703	ESR1										paraventricular nucleus, rostral part	2/301	0.239407	0.307629	2.18941	3.12996	REST;ESR1
																dorsal part of alar p2	1/301	0.479392	0.481878	1.56008	1.14703	OTX2										parvicellular (lateral) subparafascicular nucleus	2/301	0.239407	0.307629	2.18941	3.12996	TCF7L2;LEF1
																dorsal peduncular cortex, intermediate part	1/301	0.479392	0.481878	1.56008	1.14703	GATA2										parvocellular part of r8LRt	2/301	0.239407	0.307629	2.18941	3.12996	KLF1;NFE2L2
																dorsal periolivary nucleus	1/301	0.479392	0.481878	1.56008	1.14703	MYC										perilemniscal isthmic area	2/301	0.239407	0.307629	2.18941	3.12996	NEUROD1;GATA4
																dorsolateral part of Med	1/301	0.479392	0.481878	1.56008	1.14703	NEUROD1										periventricular mantle of isBM	2/301	0.239407	0.307629	2.18941	3.12996	ESR1;RUNX1
																dorsomedial part of VMH	1/301	0.479392	0.481878	1.56008	1.14703	ESR1										periventricular stratum of AOB	2/301	0.239407	0.307629	2.18941	3.12996	EOMES;GATA1
																dorsomedial tegmental nucleus	1/301	0.479392	0.481878	1.56008	1.14703	KLF1										periventricular stratum of CoPV	2/301	0.239407	0.307629	2.18941	3.12996	TCF7L2;OTX2
																external part of AOD	1/301	0.479392	0.481878	1.56008	1.14703	HNF1A										periventricular stratum of IC	2/301	0.239407	0.307629	2.18941	3.12996	TCF7L2;LEF1
																habenula (old epithalamus)	1/301	0.479392	0.481878	1.56008	1.14703	OTX2										periventricular stratum of JcPV	2/301	0.239407	0.307629	2.18941	3.12996	TCF7L2;OTX2
																intermediate mantle of isBM	1/301	0.479392	0.481878	1.56008	1.14703	FOXA1										periventricular stratum of OB	2/301	0.239407	0.307629	2.18941	3.12996	EOMES;MITF
																intermediate part of PHyB	1/301	0.479392	0.481878	1.56008	1.14703	ESR1										periventricular stratum of PO1	2/301	0.239407	0.307629	2.18941	3.12996	AR;ESR1
																intermediate part of StrSe	1/301	0.479392	0.481878	1.56008	1.14703	SOX2										periventricular stratum of PO2	2/301	0.239407	0.307629	2.18941	3.12996	AR;ESR1
																intermediate part of r2B	1/301	0.479392	0.481878	1.56008	1.14703	KLF1										periventricular stratum of PPaA	2/301	0.239407	0.307629	2.18941	3.12996	SOX2;ESR1
																intermediate part of r3B	1/301	0.479392	0.481878	1.56008	1.14703	KLF1										periventricular stratum of Pal	2/301	0.239407	0.307629	2.18941	3.12996	SOX2;EGR3
																intermediate part of r5B	1/301	0.479392	0.481878	1.56008	1.14703	KLF1										periventricular stratum of RMa	2/301	0.239407	0.307629	2.18941	3.12996	FOXA1;NFIL3
																intermediate part of r8B	1/301	0.479392	0.481878	1.56008	1.14703	NFE2L2										periventricular stratum of TPaA	2/301	0.239407	0.307629	2.18941	3.12996	SOX2;ESR1
																intermediate part of the arcuate nucleus	1/301	0.479392	0.481878	1.56008	1.14703	ESR1										periventricular stratum of isBI	2/301	0.239407	0.307629	2.18941	3.12996	GATA3;RUNX1
																intermediate pretectal nucleus	1/301	0.479392	0.481878	1.56008	1.14703	TCF7L2										periventricular stratum of isBL	2/301	0.239407	0.307629	2.18941	3.12996	FOXA1;GATA3
																intermediate stratum of CoPL	1/301	0.479392	0.481878	1.56008	1.14703	TCF7L2										periventricular stratum of m1AL	2/301	0.239407	0.307629	2.18941	3.12996	TCF7L2;EBF3
																intermediate stratum of CoPV	1/301	0.479392	0.481878	1.56008	1.14703	TCF7L2										periventricular stratum of m1B	2/301	0.239407	0.307629	2.18941	3.12996	FOXA1;REST
																intermediate stratum of Ist	1/301	0.479392	0.481878	1.56008	1.14703	NEUROD1										periventricular stratum of m2Lim	2/301	0.239407	0.307629	2.18941	3.12996	TCF7L2;EBF3
																intermediate stratum of JcPL	1/301	0.479392	0.481878	1.56008	1.14703	TCF7L2										periventricular stratum of r3Ve	2/301	0.239407	0.307629	2.18941	3.12996	GATA1;KLF1
																intermediate stratum of JcPV	1/301	0.479392	0.481878	1.56008	1.14703	TCF7L2										periventricular stratum of r4Lim	2/301	0.239407	0.307629	2.18941	3.12996	FOXA3;KLF1
																intermediate stratum of LAP	1/301	0.479392	0.481878	1.56008	1.14703	NR2F1										periventricular stratum of r4Ve	2/301	0.239407	0.307629	2.18941	3.12996	GATA1;FOXA3
																intermediate stratum of LPrP	1/301	0.479392	0.481878	1.56008	1.14703	FLI1										periventricular stratum of r5Tr	2/301	0.239407	0.307629	2.18941	3.12996	ELF4;FOXA3
																intermediate stratum of OB	1/301	0.479392	0.481878	1.56008	1.14703	EOMES										periventricular stratum of r6Co	2/301	0.239407	0.307629	2.18941	3.12996	OTX2;FOXA2
																intermediate stratum of PHyB-D	1/301	0.479392	0.481878	1.56008	1.14703	ESR1										periventricular stratum of r6Tr	2/301	0.239407	0.307629	2.18941	3.12996	ELF4;FOXA3
																intermediate stratum of POH	1/301	0.479392	0.481878	1.56008	1.14703	ESR1										periventricular stratum of r7BM	2/301	0.239407	0.307629	2.18941	3.12996	ELF4;RUNX1
																intermediate stratum of PPaA	1/301	0.479392	0.481878	1.56008	1.14703	ESR1										periventricular stratum of r9Ve	2/301	0.239407	0.307629	2.18941	3.12996	ELF4;KLF1
																intermediate stratum of PalSe	1/301	0.479392	0.481878	1.56008	1.14703	SOX2										posterior intralaminar nucleus	2/301	0.239407	0.307629	2.18941	3.12996	TCF7L2;LEF1
																intermediate stratum of PcPV	1/301	0.479392	0.481878	1.56008	1.14703	TCF7L2										posterior triangular nucleus	2/301	0.239407	0.307629	2.18941	3.12996	TCF7L2;LEF1
																intermediate stratum of RMa	1/301	0.479392	0.481878	1.56008	1.14703	FOXA1										posterolateral cortical amygdaloid area	2/301	0.239407	0.307629	2.18941	3.12996	ERF;ESR1
																intermediate stratum of SeDg	1/301	0.479392	0.481878	1.56008	1.14703	AR										posteroventral part of alar p3	2/301	0.239407	0.307629	2.18941	3.12996	TCF7L2;LEF1
																intermediate stratum of SeStr	1/301	0.479392	0.481878	1.56008	1.14703	GATA2										precommissural pretectal domain	2/301	0.239407	0.307629	2.18941	3.12996	TCF7L2;LEF1
																intermediate stratum of THyB-V	1/301	0.479392	0.481878	1.56008	1.14703	ESR1										pregeniculate nucleus	2/301	0.239407	0.307629	2.18941	3.12996	TCF7L2;LEF1
																intermediate stratum of TSPaA	1/301	0.479392	0.481878	1.56008	1.14703	ESR1										preisthmic midbrain tectum	2/301	0.239407	0.307629	2.18941	3.12996	TCF7L2;GATA4
																intermediate stratum of TTe	1/301	0.479392	0.481878	1.56008	1.14703	GATA2										preoptic alar plate	2/301	0.239407	0.307629	2.18941	3.12996	AR;ESR1
																intermediate stratum of cerebellar vermis	1/301	0.479392	0.481878	1.56008	1.14703	NEUROD1										preoptic area	2/301	0.239407	0.307629	2.18941	3.12996	AR;ESR1
																intermediate stratum of m1B	1/301	0.479392	0.481878	1.56008	1.14703	FOXA1										preoptic telencephalon	2/301	0.239407	0.307629	2.18941	3.12996	AR;ESR1
																intermediate stratum of m2Lim	1/301	0.479392	0.481878	1.56008	1.14703	GATA4										pretectum	2/301	0.239407	0.307629	2.18941	3.12996	TCF7L2;SPDEF
																intermediate stratum of p1Lim	1/301	0.479392	0.481878	1.56008	1.14703	TCF7L2										prosomere 2	2/301	0.239407	0.307629	2.18941	3.12996	TCF7L2;LEF1
																intermediate stratum of p2Lim	1/301	0.479392	0.481878	1.56008	1.14703	TCF7L2										pyramidal layer of IG	2/301	0.239407	0.307629	2.18941	3.12996	SMAD2;PRDM1
																intermediate stratum of r1BM	1/301	0.479392	0.481878	1.56008	1.14703	FOXA1										pyramidal layer of taenia tecta	2/301	0.239407	0.307629	2.18941	3.12996	REST;SOX17
																intermediate stratum of r1Lim	1/301	0.479392	0.481878	1.56008	1.14703	SPDEF										r1 part of dorsal parvicellular reticular formation	2/301	0.239407	0.307629	2.18941	3.12996	PHOX2B;SPDEF
																intermediate stratum of r1Tr	1/301	0.479392	0.481878	1.56008	1.14703	SPDEF										r1 part of intermediate nucleus of the lateral lemniscus	2/301	0.239407	0.307629	2.18941	3.12996	GATA4;SPDEF
																intermediate stratum of r2BI	1/301	0.479392	0.481878	1.56008	1.14703	KLF1										r1 part of trigeminal sensory column	2/301	0.239407	0.307629	2.18941	3.12996	PHOX2B;SPDEF
																intermediate stratum of r2BL	1/301	0.479392	0.481878	1.56008	1.14703	KLF1										r1 roof plate	2/301	0.239407	0.307629	2.18941	3.12996	MITF;FOXA3
																intermediate stratum of r2BM	1/301	0.479392	0.481878	1.56008	1.14703	RUNX1										r10 part of external cuneate nucleus	2/301	0.239407	0.307629	2.18941	3.12996	ELF4;WT1
																intermediate stratum of r2Tr	1/301	0.479392	0.481878	1.56008	1.14703	SPDEF										r2 part of basolateral reticular formation	2/301	0.239407	0.307629	2.18941	3.12996	PHOX2B;KLF1
																intermediate stratum of r3BI	1/301	0.479392	0.481878	1.56008	1.14703	KLF1										r2 part of median raphe nucleus	2/301	0.239407	0.307629	2.18941	3.12996	RARA;RUNX1
																intermediate stratum of r3BL	1/301	0.479392	0.481878	1.56008	1.14703	KLF1										r2 part of principal trigeminal sensory nucleus	2/301	0.239407	0.307629	2.18941	3.12996	FLI1;SPDEF
																intermediate stratum of r4BI	1/301	0.479392	0.481878	1.56008	1.14703	KLF1										r2 part of superior vestibular nucleus	2/301	0.239407	0.307629	2.18941	3.12996	SOX17;OTX2
																intermediate stratum of r4BL	1/301	0.479392	0.481878	1.56008	1.14703	KLF1										r2 part of trigeminal sensory column	2/301	0.239407	0.307629	2.18941	3.12996	PHOX2B;SPDEF
																intermediate stratum of r4Ve	1/301	0.479392	0.481878	1.56008	1.14703	KLF1										r2 part of vestibular sensory column	2/301	0.239407	0.307629	2.18941	3.12996	SOX17;OTX2
																intermediate stratum of r5BI	1/301	0.479392	0.481878	1.56008	1.14703	KLF1										r3 part of cochlear sensory column	2/301	0.239407	0.307629	2.18941	3.12996	NFE2;OTX2
																intermediate stratum of r5Ve	1/301	0.479392	0.481878	1.56008	1.14703	KLF1										r3 part of magnocellular medial vestibular nucleus	2/301	0.239407	0.307629	2.18941	3.12996	GATA1;PHOX2B
																intermediate stratum of r6Lim	1/301	0.479392	0.481878	1.56008	1.14703	KLF1										r3 part of parvicellular medial vestibular nucleus	2/301	0.239407	0.307629	2.18941	3.12996	GATA1;KLF1
																intermediate stratum of r6Ve	1/301	0.479392	0.481878	1.56008	1.14703	KLF1										r3 part of spinal trigeminal sensory column, oral part	2/301	0.239407	0.307629	2.18941	3.12996	EBF3;PHOX2B
																intermediate stratum of r7BM	1/301	0.479392	0.481878	1.56008	1.14703	RUNX1										r3 pontine raphe nucleus	2/301	0.239407	0.307629	2.18941	3.12996	ELF4;HOXB13
																intermediate stratum of the PBC	1/301	0.479392	0.481878	1.56008	1.14703	NEUROD1										r4 alar plate	2/301	0.239407	0.307629	2.18941	3.12996	GATA1;PHOX2B
																internal globus pallidus	1/301	0.479392	0.481878	1.56008	1.14703	LEF1										r4 liminal central gray	2/301	0.239407	0.307629	2.18941	3.12996	FOXA3;KLF1
																island of Calleja major	1/301	0.479392	0.481878	1.56008	1.14703	GATA2										r4 part of dorsal parvicellular reticular formation	2/301	0.239407	0.307629	2.18941	3.12996	STAT3;PHOX2B
																isthmic liminal reticular area	1/301	0.479392	0.481878	1.56008	1.14703	HNF1A										r4 part of lateral pontine nuclei	2/301	0.239407	0.307629	2.18941	3.12996	SMAD2;HOXB13
																isthmic part of mesencephalic trigeminal nucleus	1/301	0.479392	0.481878	1.56008	1.14703	HNF1A										r4 part of medial paralemniscal nucleus	2/301	0.239407	0.307629	2.18941	3.12996	MYC;HOXB13
																isthmic vestibulocerebellar nucleus	1/301	0.479392	0.481878	1.56008	1.14703	HOXB13										r4 part of parvocellular medial vestibular nucleus	2/301	0.239407	0.307629	2.18941	3.12996	GATA1;FOXA3
																lateral TG part of the periaqueductal gray	1/301	0.479392	0.481878	1.56008	1.14703	TCF7L2										r4 part of pontine raphe cell population	2/301	0.239407	0.307629	2.18941	3.12996	ELF4;HOXB13
																lateral amygdaloid nucleus	1/301	0.479392	0.481878	1.56008	1.14703	OTX2										r4 part of reticulotegmental nucleus, shell portion	2/301	0.239407	0.307629	2.18941	3.12996	ELF4;HOXB13
																lateral anterior hypothalamic nucleus	1/301	0.479392	0.481878	1.56008	1.14703	ESR1										r4 part of trigeminal sensory column	2/301	0.239407	0.307629	2.18941	3.12996	STAT3;PHOX2B
																lateral part of Med	1/301	0.479392	0.481878	1.56008	1.14703	HOXB13										r4 part of ventral parvicellular reticular formation	2/301	0.239407	0.307629	2.18941	3.12996	STAT3;PHOX2B
																lateral part of r2B	1/301	0.479392	0.481878	1.56008	1.14703	KLF1										r5 (gustatory) part of solitary complex	2/301	0.239407	0.307629	2.18941	3.12996	ELF4;FOXA3
																lateral part of r3B	1/301	0.479392	0.481878	1.56008	1.14703	KLF1										r5 alar plate	2/301	0.239407	0.307629	2.18941	3.12996	PHOX2B;FOXA3
																lateral part of r4B	1/301	0.479392	0.481878	1.56008	1.14703	KLF1										r5 part of posteroventral cochlear nucleus	2/301	0.239407	0.307629	2.18941	3.12996	SOX17;PHOX2B
																lateral part of the lateral habenular nucleus	1/301	0.479392	0.481878	1.56008	1.14703	OTX2										r5 part of the cochlear column	2/301	0.239407	0.307629	2.18941	3.12996	SOX17;OTX2
																lateral periretromammillary nucleus	1/301	0.479392	0.481878	1.56008	1.14703	FOXA1										r5 part of ventral parvicellular reticular formation	2/301	0.239407	0.307629	2.18941	3.12996	STAT3;PHOX2B
																lateral septal nucleus, intermedio-dorsal part	1/301	0.479392	0.481878	1.56008	1.14703	SOX2										r6 (gustatory) part of solitary complex	2/301	0.239407	0.307629	2.18941	3.12996	ELF4;FOXA3
																lateral septal nucleus, intermedio-intermediate part	1/301	0.479392	0.481878	1.56008	1.14703	SOX2										r6 part of dorsal cochlear nucleus	2/301	0.239407	0.307629	2.18941	3.12996	OTX2;FOXA2
																lateral terminal nucleus of the accessory optic tract, ventral part	1/301	0.479392	0.481878	1.56008	1.14703	TCF7L2										r6 part of dorsal parvicellular reticular formation	2/301	0.239407	0.307629	2.18941	3.12996	STAT3;PHOX2B
																lateral trapezoid nucleus	1/301	0.479392	0.481878	1.56008	1.14703	FOXA2										r6 part of spinal vestibular nucleus	2/301	0.239407	0.307629	2.18941	3.12996	OTX2;PHOX2B
																lateral wings of the dorsal raphe nucleus	1/301	0.479392	0.481878	1.56008	1.14703	EBF3										r6 part of the cochlear column	2/301	0.239407	0.307629	2.18941	3.12996	OTX2;FOXA2
																lateropallial amygdalopiriform area	1/301	0.479392	0.481878	1.56008	1.14703	NR2F1										r6 part of the trigeminal column	2/301	0.239407	0.307629	2.18941	3.12996	CDX2;PHOX2B
																lateropallial prepiriform area	1/301	0.479392	0.481878	1.56008	1.14703	FLI1										r6 part of trigeminal transition zone	2/301	0.239407	0.307629	2.18941	3.12996	CDX2;PHOX2B
																layer 1 of AOV cortex	1/301	0.479392	0.481878	1.56008	1.14703	EOMES										r7 part of gigantocellular reticular area	2/301	0.239407	0.307629	2.18941	3.12996	ELF4;RUNX1
																layer 1 of FCx	1/301	0.479392	0.481878	1.56008	1.14703	EOMES										r7 part of parapyramidal nucleus	2/301	0.239407	0.307629	2.18941	3.12996	ELF4;FOXA3
																layer 1 of InsCx	1/301	0.479392	0.481878	1.56008	1.14703	HNF1A										r7 part of spinal trigeminal nucleus, interpolar part	2/301	0.239407	0.307629	2.18941	3.12996	CDX2;PHOX2B
																layer 1 of LPrP cortex	1/301	0.479392	0.481878	1.56008	1.14703	HNF1A										r7 part of the nucleus of Roller	2/301	0.239407	0.307629	2.18941	3.12996	ELF4;RUNX1
																layer 1 of OCx	1/301	0.479392	0.481878	1.56008	1.14703	HNF1A										r7 part of ventral gigangocellular reticular area	2/301	0.239407	0.307629	2.18941	3.12996	ELF4;RUNX1
																layer 1 of PaS	1/301	0.479392	0.481878	1.56008	1.14703	POU5F1										r8 part of basomedial reticular formation	2/301	0.239407	0.307629	2.18941	3.12996	ELF4;RUNX1
																layer 1 of PrS	1/301	0.479392	0.481878	1.56008	1.14703	MNT										r8 part of linear nucleus	2/301	0.239407	0.307629	2.18941	3.12996	MYC;NFE2L2
																layer 2 of AOD cortex	1/301	0.479392	0.481878	1.56008	1.14703	HNF1A										r8 part of the paragigantocellular nucleus	2/301	0.239407	0.307629	2.18941	3.12996	ELF4;NFE2L2
																layer 2 of FCx	1/301	0.479392	0.481878	1.56008	1.14703	EOMES										r8 portion of ambiguous motor nucleus	2/301	0.239407	0.307629	2.18941	3.12996	CDX2;NFE2L2
																layer 2 of InsCx	1/301	0.479392	0.481878	1.56008	1.14703	HNF1A										r9 part of external cuneate nucleus	2/301	0.239407	0.307629	2.18941	3.12996	ELF4;KLF1
																layer 2 of LPrP cortex	1/301	0.479392	0.481878	1.56008	1.14703	FLI1										r9 part of paragigantocellular nucleus	2/301	0.239407	0.307629	2.18941	3.12996	ELF4;NFE2L2
																layer 2 of OCx	1/301	0.479392	0.481878	1.56008	1.14703	NR3C1										r9 part of parvocellular medial vestibular nucleus	2/301	0.239407	0.307629	2.18941	3.12996	ELF4;KLF1
																layer 3 of AOD cortex	1/301	0.479392	0.481878	1.56008	1.14703	HNF1A										r9 part of spinal trigeminal nucleus, interpolar part	2/301	0.239407	0.307629	2.18941	3.12996	CDX2;NFE2L2
																layer 3 of InsCx	1/301	0.479392	0.481878	1.56008	1.14703	FLI1										r9 part of the inferior olive	2/301	0.239407	0.307629	2.18941	3.12996	ELF4;NFE2L2
																layer 4 of InsCx	1/301	0.479392	0.481878	1.56008	1.14703	HNF1A										red nucleus, parvicellular part	2/301	0.239407	0.307629	2.18941	3.12996	FOXA1;FOXA2
																layer 5 of CCx	1/301	0.479392	0.481878	1.56008	1.14703	ERG										reticular formation of CoPD	2/301	0.239407	0.307629	2.18941	3.12996	TCF7L2;MNT
																layer 5 of InsCx	1/301	0.479392	0.481878	1.56008	1.14703	FLI1										reticular formation of p2Lim	2/301	0.239407	0.307629	2.18941	3.12996	TCF7L2;HNF4G
																layer 5 of PCx	1/301	0.479392	0.481878	1.56008	1.14703	BHLHE40										retromammillary area	2/301	0.239407	0.307629	2.18941	3.12996	FOXA1;NFIL3
																layer 6 of CCx	1/301	0.479392	0.481878	1.56008	1.14703	ETV5										retromammillary area, medial part	2/301	0.239407	0.307629	2.18941	3.12996	FOXA1;NFIL3
																layer 6 of PCx	1/301	0.479392	0.481878	1.56008	1.14703	BHLHE40										retrotrapezoid nucleus	2/301	0.239407	0.307629	2.18941	3.12996	MITF;FOXA3
																liminal part of alar p2	1/301	0.479392	0.481878	1.56008	1.14703	TCF7L2										rostral interpeduncular nucleus	2/301	0.239407	0.307629	2.18941	3.12996	FOXA1;REST
																liminal part of alar r1	1/301	0.479392	0.481878	1.56008	1.14703	SPDEF										rostral paraventricular nucleus	2/301	0.239407	0.307629	2.18941	3.12996	SOX2;ESR1
																lower basal perifornical nucleus	1/301	0.479392	0.481878	1.56008	1.14703	AR										rostral secondary prosencephalon	2/301	0.239407	0.307629	2.18941	3.12996	AR;ESR1
																m1 part of parabrachialis pigmentosus	1/301	0.479392	0.481878	1.56008	1.14703	FOXA1										rostral ventrolateral reticular area	2/301	0.239407	0.307629	2.18941	3.12996	FOXA3;NFE2L2
																m1B part of the periaqueductal gray	1/301	0.479392	0.481878	1.56008	1.14703	FOXA1										rostromedial tegmental nucleus	2/301	0.239407	0.307629	2.18941	3.12996	ELF4;RARA
																m2 part of nucleus parabrachialis pigmentosus	1/301	0.479392	0.481878	1.56008	1.14703	FOXA1										second (ventral) preoptic domain	2/301	0.239407	0.307629	2.18941	3.12996	AR;ESR1
																m2 part of paranigral nucleus	1/301	0.479392	0.481878	1.56008	1.14703	FOXA1										secondary prosencephalon	2/301	0.239407	0.307629	2.18941	3.12996	EOMES;EGR3
																m2 part of substantia nigra compacta	1/301	0.479392	0.481878	1.56008	1.14703	FOXA1										septohypothalamic nucleus	2/301	0.239407	0.307629	2.18941	3.12996	SOX2;ERG
																magnocellular interstitial nucleus of the posterior commissure	1/301	0.479392	0.481878	1.56008	1.14703	TCF7L2										shell of T-DMH	2/301	0.239407	0.307629	2.18941	3.12996	AR;ESR1
																mammillary part of PHyB	1/301	0.479392	0.481878	1.56008	1.14703	FOXA1										striatum (corpus striatum)	2/301	0.239407	0.307629	2.18941	3.12996	EGR3;FOXO1
																mantle zone of AOB	1/301	0.479392	0.481878	1.56008	1.14703	EOMES										striohypothalamic nucleus	2/301	0.239407	0.307629	2.18941	3.12996	AR;ESR1
																mantle zone of APal	1/301	0.479392	0.481878	1.56008	1.14703	OTX2										subcuneiform nucleus	2/301	0.239407	0.307629	2.18941	3.12996	WT1;HNF1A
																mantle zone of CCx	1/301	0.479392	0.481878	1.56008	1.14703	ERG										sublayer 6b of PCx	2/301	0.239407	0.307629	2.18941	3.12996	BHLHE40;NR3C1
																mantle zone of DgSe	1/301	0.479392	0.481878	1.56008	1.14703	ESR1										subpallium	2/301	0.239407	0.307629	2.18941	3.12996	EGR3;FOXO1
																mantle zone of Hb	1/301	0.479392	0.481878	1.56008	1.14703	OTX2										superficial layers of TG	2/301	0.239407	0.307629	2.18941	3.12996	OTX2;SPDEF
																mantle zone of JcPV	1/301	0.479392	0.481878	1.56008	1.14703	TCF7L2										superficial stratum of CA	2/301	0.239407	0.307629	2.18941	3.12996	AR;TCF4
																mantle zone of LAP	1/301	0.479392	0.481878	1.56008	1.14703	NR2F1										superficial stratum of CoPD	2/301	0.239407	0.307629	2.18941	3.12996	TCF7L2;SPDEF
																mantle zone of LPrP	1/301	0.479392	0.481878	1.56008	1.14703	FLI1										superficial stratum of CoPL	2/301	0.239407	0.307629	2.18941	3.12996	TCF7L2;MNT
																mantle zone of OB	1/301	0.479392	0.481878	1.56008	1.14703	EOMES										superficial stratum of ITTh	2/301	0.239407	0.307629	2.18941	3.12996	TCF7L2;LEF1
																mantle zone of PHyB-D	1/301	0.479392	0.481878	1.56008	1.14703	ESR1										superficial stratum of InsCx (cortical plate/marginal zone)	2/301	0.239407	0.307629	2.18941	3.12996	HNF1A;FLI1
																mantle zone of PHyB-I	1/301	0.479392	0.481878	1.56008	1.14703	ESR1										superficial stratum of Ist	2/301	0.239407	0.307629	2.18941	3.12996	NEUROD1;GATA4
																mantle zone of PHyB-V	1/301	0.479392	0.481878	1.56008	1.14703	SOX2										superficial stratum of JcPL	2/301	0.239407	0.307629	2.18941	3.12996	TCF7L2;MNT
																mantle zone of POH	1/301	0.479392	0.481878	1.56008	1.14703	ESR1										superficial stratum of PHyB-I	2/301	0.239407	0.307629	2.18941	3.12996	SMAD2;NFIL3
																mantle zone of PPaA	1/301	0.479392	0.481878	1.56008	1.14703	ESR1										superficial stratum of THyB-I	2/301	0.239407	0.307629	2.18941	3.12996	SMAD2;AR
																mantle zone of PalSe	1/301	0.479392	0.481878	1.56008	1.14703	SOX2										superficial stratum of TTe	2/301	0.239407	0.307629	2.18941	3.12996	REST;SOX17
																mantle zone of PcPV	1/301	0.479392	0.481878	1.56008	1.14703	TCF7L2										superficial stratum of VTTh	2/301	0.239407	0.307629	2.18941	3.12996	TCF7L2;LEF1
																mantle zone of RMa	1/301	0.479392	0.481878	1.56008	1.14703	FOXA1										superficial stratum of cerebellar vermis	2/301	0.239407	0.307629	2.18941	3.12996	NEUROD1;MAX
																mantle zone of SeDg	1/301	0.479392	0.481878	1.56008	1.14703	AR										superficial stratum of isLim	2/301	0.239407	0.307629	2.18941	3.12996	GATA4;SPDEF
																mantle zone of THyB-P	1/301	0.479392	0.481878	1.56008	1.14703	AR										superficial stratum of m2ADL	2/301	0.239407	0.307629	2.18941	3.12996	NEUROD1;GATA4
																mantle zone of THyB-V	1/301	0.479392	0.481878	1.56008	1.14703	ESR1										superficial stratum of p2ZL	2/301	0.239407	0.307629	2.18941	3.12996	TCF7L2;LEF1
																mantle zone of TPaA	1/301	0.479392	0.481878	1.56008	1.14703	ESR1										superficial stratum of p3ZL	2/301	0.239407	0.307629	2.18941	3.12996	TCF7L2;LEF1
																mantle zone of TSPaA	1/301	0.479392	0.481878	1.56008	1.14703	ESR1										superficial stratum of r10Ve	2/301	0.239407	0.307629	2.18941	3.12996	ELF4;WT1
																mantle zone of TTe	1/301	0.479392	0.481878	1.56008	1.14703	SOX17										superficial stratum of r1BL	2/301	0.239407	0.307629	2.18941	3.12996	GATA4;SPDEF
																mantle zone of p2Lim	1/301	0.479392	0.481878	1.56008	1.14703	TCF7L2										superficial stratum of r2BM	2/301	0.239407	0.307629	2.18941	3.12996	ELF4;RARA
																mantle zone of r11Tr	1/301	0.479392	0.481878	1.56008	1.14703	NFE2										superficial stratum of r2Tr	2/301	0.239407	0.307629	2.18941	3.12996	FLI1;SPDEF
																mantle zone of r1BM	1/301	0.479392	0.481878	1.56008	1.14703	FOXA1										superficial stratum of r3Tr	2/301	0.239407	0.307629	2.18941	3.12996	EBF3;PHOX2B
																mantle zone of r1Lim	1/301	0.479392	0.481878	1.56008	1.14703	SPDEF										superficial stratum of r4BI	2/301	0.239407	0.307629	2.18941	3.12996	SMAD2;HOXB13
																mantle zone of r1Tr	1/301	0.479392	0.481878	1.56008	1.14703	SPDEF										superficial stratum of r5BI	2/301	0.239407	0.307629	2.18941	3.12996	ELF4;FOXA2
																mantle zone of r2BI	1/301	0.479392	0.481878	1.56008	1.14703	KLF1										superficial stratum of r5Co	2/301	0.239407	0.307629	2.18941	3.12996	SOX17;PHOX2B
																mantle zone of r2BL	1/301	0.479392	0.481878	1.56008	1.14703	KLF1										superficial stratum of r5Lim	2/301	0.239407	0.307629	2.18941	3.12996	STAT3;PHOX2B
																mantle zone of r2BM	1/301	0.479392	0.481878	1.56008	1.14703	RUNX1										superficial stratum of r6BL	2/301	0.239407	0.307629	2.18941	3.12996	MITF;FOXA3
																mantle zone of r2Tr	1/301	0.479392	0.481878	1.56008	1.14703	SPDEF										superficial stratum of r6Lim	2/301	0.239407	0.307629	2.18941	3.12996	FOXA3;NFE2L2
																mantle zone of r3BI	1/301	0.479392	0.481878	1.56008	1.14703	KLF1										superficial stratum of r6Ve	2/301	0.239407	0.307629	2.18941	3.12996	OTX2;PHOX2B
																mantle zone of r3BL	1/301	0.479392	0.481878	1.56008	1.14703	KLF1										superficial stratum of r7BL	2/301	0.239407	0.307629	2.18941	3.12996	FOXA3;NFE2L2
																mantle zone of r3Ve	1/301	0.479392	0.481878	1.56008	1.14703	HNF1A										superficial stratum of r7BM	2/301	0.239407	0.307629	2.18941	3.12996	ELF4;FOXA3
																mantle zone of r4BL	1/301	0.479392	0.481878	1.56008	1.14703	KLF1										superficial stratum of r7Tr	2/301	0.239407	0.307629	2.18941	3.12996	CDX2;PHOX2B
																mantle zone of r4Ve	1/301	0.479392	0.481878	1.56008	1.14703	HNF1A										superficial stratum of r8BI	2/301	0.239407	0.307629	2.18941	3.12996	ELF4;NFE2L2
																mantle zone of r5BI	1/301	0.479392	0.481878	1.56008	1.14703	KLF1										superficial stratum of r8BL	2/301	0.239407	0.307629	2.18941	3.12996	MYC;NFE2L2
																mantle zone of r5Ve	1/301	0.479392	0.481878	1.56008	1.14703	HNF1A										superficial stratum of r8Lim	2/301	0.239407	0.307629	2.18941	3.12996	CDX2;NFE2L2
																mantle zone of r7BM	1/301	0.479392	0.481878	1.56008	1.14703	RUNX1										superficial stratum of r9BI	2/301	0.239407	0.307629	2.18941	3.12996	ELF4;NFE2L2
																mantle zone of r7Co	1/301	0.479392	0.481878	1.56008	1.14703	OTX2										superficial stratum of r9BL	2/301	0.239407	0.307629	2.18941	3.12996	KLF1;NFE2L2
																mantle zone of r7Tr	1/301	0.479392	0.481878	1.56008	1.14703	MYC										superficial stratum of r9BM	2/301	0.239407	0.307629	2.18941	3.12996	ELF4;NFE2L2
																mantle zone of r8BI	1/301	0.479392	0.481878	1.56008	1.14703	NFE2L2										superficial stratum of r9Tr	2/301	0.239407	0.307629	2.18941	3.12996	CDX2;NFE2L2
																medial (fastigial) cerebellar nucleus	1/301	0.479392	0.481878	1.56008	1.14703	NEUROD1										superficial stratum of r9Ve	2/301	0.239407	0.307629	2.18941	3.12996	ELF4;KLF1
																medial (main) part of Med	1/301	0.479392	0.481878	1.56008	1.14703	KLF1										superficial stratum of the IG	2/301	0.239407	0.307629	2.18941	3.12996	SMAD2;PRDM1
																medial pallium (hippocampal allocortex)	1/301	0.479392	0.481878	1.56008	1.14703	TCF4										tegmental field of p3 (Forel's field)	2/301	0.239407	0.307629	2.18941	3.12996	FOXA1;EBF3
																medial parabrachial nucleus	1/301	0.479392	0.481878	1.56008	1.14703	NEUROD1										telencephalic vesicle	2/301	0.239407	0.307629	2.18941	3.12996	EOMES;EGR3
																medial part of r1B	1/301	0.479392	0.481878	1.56008	1.14703	FOXA1										temporal muscle trigeminal motor cell group	2/301	0.239407	0.307629	2.18941	3.12996	SPDEF;FOXA2
																medial part of r2B	1/301	0.479392	0.481878	1.56008	1.14703	RUNX1										terminal nucleus of the stria medullaris	2/301	0.239407	0.307629	2.18941	3.12996	ERG;ESR1
																medial part of r7B	1/301	0.479392	0.481878	1.56008	1.14703	RUNX1										upper basal lateral hypothalamic area	2/301	0.239407	0.307629	2.18941	3.12996	SMAD2;EBF3
																medial tuberal nucleus	1/301	0.479392	0.481878	1.56008	1.14703	AR										ventral isthmic part of dorsal raphe nucleus	2/301	0.239407	0.307629	2.18941	3.12996	ESR1;RUNX1
																nucleus of Barrington	1/301	0.479392	0.481878	1.56008	1.14703	EBF3										ventral pallium	2/301	0.239407	0.307629	2.18941	3.12996	EOMES;MITF
																nucleus of the inferior collicular brachium, caudal part	1/301	0.479392	0.481878	1.56008	1.14703	GATA4										ventral part of CoP	2/301	0.239407	0.307629	2.18941	3.12996	TCF7L2;OTX2
																nucleus subcoeruleus, r1 part	1/301	0.479392	0.481878	1.56008	1.14703	KLF1										ventral premammillary nucleus (migrated)	2/301	0.239407	0.307629	2.18941	3.12996	AR;ESR1
																olfactory bulb, principal part	1/301	0.479392	0.481878	1.56008	1.14703	EOMES										ventral subnucleus of MG	2/301	0.239407	0.307629	2.18941	3.12996	TCF7L2;LEF1
																p1 part of the substantia nigra reticulata	1/301	0.479392	0.481878	1.56008	1.14703	FOXA1										ventral tier of thalamus	2/301	0.239407	0.307629	2.18941	3.12996	TCF7L2;LEF1
																p1Lim part of periaqueductal gray	1/301	0.479392	0.481878	1.56008	1.14703	TCF7L2										ventrolateral part of alar p1	2/301	0.239407	0.307629	2.18941	3.12996	TCF7L2;EBF3
																p2 portion of the substantia nigra pars reticulata	1/301	0.479392	0.481878	1.56008	1.14703	FOXA1										ventrolateral part of m2A	2/301	0.239407	0.307629	2.18941	3.12996	EBF3;GATA4
																p3 portion of paranigral nucleus	1/301	0.479392	0.481878	1.56008	1.14703	FOXA1										ventromedial nucleus	2/301	0.239407	0.307629	2.18941	3.12996	TCF7L2;LEF1
																pallidal amygdala	1/301	0.479392	0.481878	1.56008	1.14703	OTX2										ventropallial amygdalopiriform area	2/301	0.239407	0.307629	2.18941	3.12996	NR2F1;ESR1
																pallidal part of olfactory tuberculum	1/301	0.479392	0.481878	1.56008	1.14703	NFE2										vertical nucleus of the diagonal band	2/301	0.239407	0.307629	2.18941	3.12996	REST;ESR1
																pallidal septum	1/301	0.479392	0.481878	1.56008	1.14703	SOX2										Field CA1	2/344	0.288882	0.370959	1.90994	2.37164	AR;TCF4
																pararubral nucleus, m1 part	1/301	0.479392	0.481878	1.56008	1.14703	FOXA1										Field CA1, stratum radiatum	2/345	0.290032	0.372192	1.90428	2.35704	AR;TCF4
																parasubthalamic nucleus (migrated)	1/301	0.479392	0.481878	1.56008	1.14703	HOXB13										Anterodorsal nucleus	2/354	0.300374	0.385212	1.85473	2.23074	LEF1;FOXA2
																paraventricular nucleus, lateral part	1/301	0.479392	0.481878	1.56008	1.14703	ERG										Lateral mammillary nucleus	2/384	0.334658	0.428897	1.70646	1.86797	FOXA1;SMAD2
																paraventricular nucleus, rostral part	1/301	0.479392	0.481878	1.56008	1.14703	ESR1										Dorsal tegmental nucleus	2/396	0.348253	0.446029	1.65347	1.74412	SOX2;FOXA2
																parvicellular part of Lat	1/301	0.479392	0.481878	1.56008	1.14703	NEUROD1										Trochlear nucleus	2/405	0.358393	0.458715	1.6158	1.65801	ESR1;RUNX1
																peduncular (caudal) hypothalamus	1/301	0.479392	0.481878	1.56008	1.14703	ESR1										Field CA2, stratum radiatum	2/410	0.364004	0.465591	1.59559	1.61249	AR;TCF4
																peduncular paraventricular area of PHyA	1/301	0.479392	0.481878	1.56008	1.14703	ESR1										Supraoptic nucleus	2/424	0.379616	0.485245	1.54155	1.49313	SOX17;HNF1A
																perimammillary part of THyB	1/301	0.479392	0.481878	1.56008	1.14703	AR										Field CA2	2/425	0.380726	0.486345	1.53783	1.48504	AR;TCF4
																periventricular stratum of AOB	1/301	0.479392	0.481878	1.56008	1.14703	EOMES										Field CA2, stratum oriens	2/431	0.387366	0.494505	1.51585	1.43761	AR;TCF4
																periventricular stratum of APal	1/301	0.479392	0.481878	1.56008	1.14703	OTX2										Anterior hypothalamic nucleus	2/492	0.453003	0.577918	1.32299	1.04762	ERG;ESR1
																periventricular stratum of OB	1/301	0.479392	0.481878	1.56008	1.14703	EOMES										Accessory olfactory bulb, granular layer	1/301	0.610012	0.611888	1.07311	0.530416	EOMES
																periventricular stratum of Pal	1/301	0.479392	0.481878	1.56008	1.14703	SOX2										Agranular insular area	1/301	0.610012	0.611888	1.07311	0.530416	FLI1
																periventricular stratum of PcPV	1/301	0.479392	0.481878	1.56008	1.14703	TCF7L2										Agranular insular area, dorsal part	1/301	0.610012	0.611888	1.07311	0.530416	FLI1
																periventricular stratum of RMa	1/301	0.479392	0.481878	1.56008	1.14703	FOXA1										Agranular insular area, dorsal part, layer 1	1/301	0.610012	0.611888	1.07311	0.530416	HNF1A
																periventricular stratum of SeStr	1/301	0.479392	0.481878	1.56008	1.14703	SPDEF										Agranular insular area, dorsal part, layer 2/3	1/301	0.610012	0.611888	1.07311	0.530416	FLI1
																periventricular stratum of isLim	1/301	0.479392	0.481878	1.56008	1.14703	EBF3										Agranular insular area, dorsal part, layer 5	1/301	0.610012	0.611888	1.07311	0.530416	FLI1
																periventricular stratum of m1B	1/301	0.479392	0.481878	1.56008	1.14703	FOXA1										Agranular insular area, dorsal part, layer 6a	1/301	0.610012	0.611888	1.07311	0.530416	POU5F1
																periventricular stratum of p1Lim	1/301	0.479392	0.481878	1.56008	1.14703	TCF7L2										Agranular insular area, ventral part	1/301	0.610012	0.611888	1.07311	0.530416	FLI1
																periventricular stratum of r1BM	1/301	0.479392	0.481878	1.56008	1.14703	SOX2										Agranular insular area, ventral part, layer 2/3	1/301	0.610012	0.611888	1.07311	0.530416	POU5F1
																periventricular stratum of r3Co	1/301	0.479392	0.481878	1.56008	1.14703	OTX2										Agranular insular area, ventral part, layer 5	1/301	0.610012	0.611888	1.07311	0.530416	FLI1
																periventricular stratum of r3Ve	1/301	0.479392	0.481878	1.56008	1.14703	KLF1										Ammon's horn	1/301	0.610012	0.611888	1.07311	0.530416	TCF4
																periventricular stratum of r4Co	1/301	0.479392	0.481878	1.56008	1.14703	OTX2										Anterior cingulate area, dorsal part	1/301	0.610012	0.611888	1.07311	0.530416	GATA1
																periventricular stratum of r4Lim	1/301	0.479392	0.481878	1.56008	1.14703	KLF1										Anterior cingulate area, dorsal part, layer 6b	1/301	0.610012	0.611888	1.07311	0.530416	GATA2
																periventricular stratum of r5BM	1/301	0.479392	0.481878	1.56008	1.14703	HNF1A										Anterior cingulate area, ventral part, 6a	1/301	0.610012	0.611888	1.07311	0.530416	PRDM1
																periventricular stratum of r5Co	1/301	0.479392	0.481878	1.56008	1.14703	OTX2										Anterior cingulate area, ventral part, layer 2/3	1/301	0.610012	0.611888	1.07311	0.530416	PRDM1
																periventricular stratum of r5Ve	1/301	0.479392	0.481878	1.56008	1.14703	KLF1										Anterior cingulate area, ventral part, layer 5	1/301	0.610012	0.611888	1.07311	0.530416	PRDM1
																periventricular stratum of r6BM	1/301	0.479392	0.481878	1.56008	1.14703	RUNX1										Anterolateral visual area, layer 6a	1/301	0.610012	0.611888	1.07311	0.530416	NR3C1
																periventricular stratum of r6Ve	1/301	0.479392	0.481878	1.56008	1.14703	KLF1										Anterolateral visual area, layer 6b	1/301	0.610012	0.611888	1.07311	0.530416	NR3C1
																periventricular stratum of r7BM	1/301	0.479392	0.481878	1.56008	1.14703	RUNX1										Anteromedial visual area, layer 1	1/301	0.610012	0.611888	1.07311	0.530416	EGR3
																periventricular stratum of r7Co	1/301	0.479392	0.481878	1.56008	1.14703	OTX2										Anteromedial visual area, layer 2/3	1/301	0.610012	0.611888	1.07311	0.530416	EGR3
																periventricular stratum of r7Tr	1/301	0.479392	0.481878	1.56008	1.14703	KLF1										Anteromedial visual area, layer 4	1/301	0.610012	0.611888	1.07311	0.530416	SOX17
																periventricular stratum of r8BM	1/301	0.479392	0.481878	1.56008	1.14703	RUNX1										Bed nuclei of the stria terminalis, anterior division, fusiform nucleus	1/301	0.610012	0.611888	1.07311	0.530416	AR
																periventricular stratum of r8Tr	1/301	0.479392	0.481878	1.56008	1.14703	KLF1										Bed nuclei of the stria terminalis, anterior division, rhomboid nucleus	1/301	0.610012	0.611888	1.07311	0.530416	SOX2
																periventricular stratum of r9Tr	1/301	0.479392	0.481878	1.56008	1.14703	KLF1										Cerebellar nuclei	1/301	0.610012	0.611888	1.07311	0.530416	NEUROD1
																periventricular stratum of r9Ve	1/301	0.479392	0.481878	1.56008	1.14703	KLF1										Cortical amygdalar area, anterior part	1/301	0.610012	0.611888	1.07311	0.530416	GATA3
																plexiform layer of TuPal	1/301	0.479392	0.481878	1.56008	1.14703	NFE2										Cortical amygdalar area, anterior part, layer 2	1/301	0.610012	0.611888	1.07311	0.530416	GATA3
																polymorph layer of TuStr	1/301	0.479392	0.481878	1.56008	1.14703	GATA2										Dentate gyrus, polymorph layer	1/301	0.610012	0.611888	1.07311	0.530416	NFE2
																posterior part of anterior hypothalamic nucleus	1/301	0.479392	0.481878	1.56008	1.14703	ESR1										Diagonal band nucleus	1/301	0.610012	0.611888	1.07311	0.530416	ESR1
																posterobasal nucleus, intermediate part	1/301	0.479392	0.481878	1.56008	1.14703	ESR1										Dopaminergic A13 group	1/301	0.610012	0.611888	1.07311	0.530416	ERG
																posteromedial visual area, layer 1	1/301	0.479392	0.481878	1.56008	1.14703	SOX17										Dorsal cochlear nucleus	1/301	0.610012	0.611888	1.07311	0.530416	OTX2
																preopto-hypothalamic area	1/301	0.479392	0.481878	1.56008	1.14703	ESR1										Ectorhinal area/Layer 5	1/301	0.610012	0.611888	1.07311	0.530416	PRDM1
																preopto-hypothalamic band	1/301	0.479392	0.481878	1.56008	1.14703	ESR1										Endopiriform nucleus	1/301	0.610012	0.611888	1.07311	0.530416	FLI1
																pterigoid muscle trigeminal motor cell group	1/301	0.479392	0.481878	1.56008	1.14703	FOXA2										Endopiriform nucleus, dorsal part	1/301	0.610012	0.611888	1.07311	0.530416	FLI1
																pyramidal layer of taenia tecta	1/301	0.479392	0.481878	1.56008	1.14703	SOX17										Endopiriform nucleus, ventral part	1/301	0.610012	0.611888	1.07311	0.530416	WT1
																r1 basal plate	1/301	0.479392	0.481878	1.56008	1.14703	FOXA1										Entorhinal area, lateral part, layer 5	1/301	0.610012	0.611888	1.07311	0.530416	STAT3
																r1 part of basomedial reticular formation	1/301	0.479392	0.481878	1.56008	1.14703	FOXA1										Entorhinal area, medial part, dorsal zone, layer 3	1/301	0.610012	0.611888	1.07311	0.530416	KLF5
																r1 part of dorsal parvicellular reticular formation	1/301	0.479392	0.481878	1.56008	1.14703	SPDEF										Entorhinal area, medial part, dorsal zone, layer 4	1/301	0.610012	0.611888	1.07311	0.530416	KLF5
																r1 part of dorsal raphe nucleus	1/301	0.479392	0.481878	1.56008	1.14703	SOX2										Field CA2, pyramidal layer	1/301	0.610012	0.611888	1.07311	0.530416	TCF4
																r1 part of lateral pontine nuclei	1/301	0.479392	0.481878	1.56008	1.14703	POU5F1										Fields of Forel	1/301	0.610012	0.611888	1.07311	0.530416	HNF1B
																r1 part of trigeminal sensory column	1/301	0.479392	0.481878	1.56008	1.14703	SPDEF										Fundus of striatum	1/301	0.610012	0.611888	1.07311	0.530416	GATA3
																r1 part of ventral parvicellular reticular formation	1/301	0.479392	0.481878	1.56008	1.14703	SPDEF										Gustatory areas	1/301	0.610012	0.611888	1.07311	0.530416	HNF1A
																r10 part of the inferior olive	1/301	0.479392	0.481878	1.56008	1.14703	NFE2L2										Gustatory areas, layer 1	1/301	0.610012	0.611888	1.07311	0.530416	HNF1A
																r11 part of spinal trigeminal nucleus, caudal part	1/301	0.479392	0.481878	1.56008	1.14703	NFE2										Gustatory areas, layer 2/3	1/301	0.610012	0.611888	1.07311	0.530416	HNF1A
																r11 part of the trigeminal column	1/301	0.479392	0.481878	1.56008	1.14703	NFE2										Gustatory areas, layer 5	1/301	0.610012	0.611888	1.07311	0.530416	RUNX1
																r2 part of basointermediate reticular formation	1/301	0.479392	0.481878	1.56008	1.14703	KLF1										Hippocampal formation	1/301	0.610012	0.611888	1.07311	0.530416	TCF4
																r2 part of basolateral reticular formation	1/301	0.479392	0.481878	1.56008	1.14703	KLF1										Hypothalamic lateral zone	1/301	0.610012	0.611888	1.07311	0.530416	ESR1
																r2 part of dorsal parvicellular reticular formation	1/301	0.479392	0.481878	1.56008	1.14703	SPDEF										Lateral amygdalar nucleus	1/301	0.610012	0.611888	1.07311	0.530416	OTX2
																r2 part of lateral pontine nuclei	1/301	0.479392	0.481878	1.56008	1.14703	POU5F1										Lateral preoptic area	1/301	0.610012	0.611888	1.07311	0.530416	ESR1
																r2 part of nucleus subcoeruleus	1/301	0.479392	0.481878	1.56008	1.14703	KLF1										Lateral septal complex	1/301	0.610012	0.611888	1.07311	0.530416	SOX2
																r2 part of prepontine raphe nucleus	1/301	0.479392	0.481878	1.56008	1.14703	RUNX1										Lateral septal nucleus	1/301	0.610012	0.611888	1.07311	0.530416	SOX2
																r2 part of the trigeminal motor nucleus	1/301	0.479392	0.481878	1.56008	1.14703	SPDEF										Lateral septal nucleus, caudal (caudodorsal) part	1/301	0.610012	0.611888	1.07311	0.530416	SOX2
																r2 part of trigeminal sensory column	1/301	0.479392	0.481878	1.56008	1.14703	SPDEF										Lingula (I)	1/301	0.610012	0.611888	1.07311	0.530416	FOXA3
																r3 part of basointermediate reticular formation	1/301	0.479392	0.481878	1.56008	1.14703	KLF1										Lingula (I), molecular layer	1/301	0.610012	0.611888	1.07311	0.530416	FOXA3
																r3 part of basolateral reticular formation	1/301	0.479392	0.481878	1.56008	1.14703	KLF1										Lobule III	1/301	0.610012	0.611888	1.07311	0.530416	NEUROD1
																r3 part of dorsal cochlear nucleus	1/301	0.479392	0.481878	1.56008	1.14703	OTX2										Lobule III, granular layer	1/301	0.610012	0.611888	1.07311	0.530416	NEUROD1
																r3 part of parvicellular medial vestibular nucleus	1/301	0.479392	0.481878	1.56008	1.14703	KLF1										Lobule III, molecular layer	1/301	0.610012	0.611888	1.07311	0.530416	NEUROD1
																r3 part of spinal trigeminal sensory column, oral part	1/301	0.479392	0.481878	1.56008	1.14703	EBF3										Major island of Calleja	1/301	0.610012	0.611888	1.07311	0.530416	ERG
																r3 part of vestibular sensory column	1/301	0.479392	0.481878	1.56008	1.14703	HNF1A										Mammillary body	1/301	0.610012	0.611888	1.07311	0.530416	SMAD2
																r3 pontine raphe nucleus	1/301	0.479392	0.481878	1.56008	1.14703	HOXB13										Medial septal nucleus	1/301	0.610012	0.611888	1.07311	0.530416	REST
																r4 liminal central gray	1/301	0.479392	0.481878	1.56008	1.14703	KLF1										Midbrain trigeminal nucleus	1/301	0.610012	0.611888	1.07311	0.530416	HNF4G
																r4 part of basointermediate reticular formation	1/301	0.479392	0.481878	1.56008	1.14703	KLF1										Orbital area, lateral part, layer 6a	1/301	0.610012	0.611888	1.07311	0.530416	PRDM1
																r4 part of basolateral reticular formation	1/301	0.479392	0.481878	1.56008	1.14703	KLF1										Orbital area, medial part	1/301	0.610012	0.611888	1.07311	0.530416	PRDM1
																r4 part of dorsal cochlear nucleus	1/301	0.479392	0.481878	1.56008	1.14703	OTX2										Orbital area, medial part, layer 6a	1/301	0.610012	0.611888	1.07311	0.530416	ELF1
																r4 part of lateral pontine nuclei	1/301	0.479392	0.481878	1.56008	1.14703	HOXB13										Orbital area, ventrolateral part, layer 5	1/301	0.610012	0.611888	1.07311	0.530416	PRDM1
																r4 part of lateral vestibular nucleus	1/301	0.479392	0.481878	1.56008	1.14703	HNF1A										Orbital area, ventrolateral part, layer 6a	1/301	0.610012	0.611888	1.07311	0.530416	GATA2
																r4 part of magnocellular medial vestibular nucleus	1/301	0.479392	0.481878	1.56008	1.14703	KLF1										Pallidum, ventral region	1/301	0.610012	0.611888	1.07311	0.530416	GATA3
																r4 part of pontine raphe cell population	1/301	0.479392	0.481878	1.56008	1.14703	HOXB13										Parabrachial nucleus, medial division	1/301	0.610012	0.611888	1.07311	0.530416	HNF4G
																r4 part of reticulotegmental nucleus, shell portion	1/301	0.479392	0.481878	1.56008	1.14703	HOXB13										Parabrachial nucleus, medial division, medial medial part	1/301	0.610012	0.611888	1.07311	0.530416	HNF4G
																r4 part of vestibular sensory column	1/301	0.479392	0.481878	1.56008	1.14703	HNF1A										Parapyramidal nucleus	1/301	0.610012	0.611888	1.07311	0.530416	FOXA3
																r5 part of basointermediate reticular formation	1/301	0.479392	0.481878	1.56008	1.14703	KLF1										Parasubthalamic nucleus	1/301	0.610012	0.611888	1.07311	0.530416	SMAD2
																r5 part of dorsal cochlear nucleus	1/301	0.479392	0.481878	1.56008	1.14703	OTX2										PcPV part of the periaqueductal gray	1/301	0.610012	0.611888	1.07311	0.530416	TCF7L2
																r5 part of magnocellular medial vestibular nucleus	1/301	0.479392	0.481878	1.56008	1.14703	KLF1										Piriform area, pyramidal layer	1/301	0.610012	0.611888	1.07311	0.530416	FLI1
																r5 part of parvocellular medial vestibular nucleus	1/301	0.479392	0.481878	1.56008	1.14703	KLF1										Piriform-amygdalar area, polymorph layer	1/301	0.610012	0.611888	1.07311	0.530416	ESR1
																r5 part of posteroventral cochlear nucleus	1/301	0.479392	0.481878	1.56008	1.14703	SOX17										Pontine central gray	1/301	0.610012	0.611888	1.07311	0.530416	FOXA3
																r5 part of the vestibular column	1/301	0.479392	0.481878	1.56008	1.14703	HNF1A										Posterior parietal association areas	1/301	0.610012	0.611888	1.07311	0.530416	EGR3
																r6 basal plate	1/301	0.479392	0.481878	1.56008	1.14703	HOXB13										Posterior parietal association areas, layer 1	1/301	0.610012	0.611888	1.07311	0.530416	EGR3
																r6 part of gigantocellular reticular area	1/301	0.479392	0.481878	1.56008	1.14703	HOXB13										Posterior parietal association areas, layer 2/3	1/301	0.610012	0.611888	1.07311	0.530416	EGR3
																r6 part of magnocellular medial vestibular nucleus	1/301	0.479392	0.481878	1.56008	1.14703	KLF1										Posterior parietal association areas, layer 6a	1/301	0.610012	0.611888	1.07311	0.530416	BHLHE40
																r6 part of nucleus prepositus	1/301	0.479392	0.481878	1.56008	1.14703	RUNX1										Posterior parietal association areas, layer 6b	1/301	0.610012	0.611888	1.07311	0.530416	NR3C1
																r6 part of parvocellular medial vestibular nucleus	1/301	0.479392	0.481878	1.56008	1.14703	KLF1										Posterolateral visual area, layer 4	1/301	0.610012	0.611888	1.07311	0.530416	BHLHE40
																r6 part of spinal vestibular nucleus	1/301	0.479392	0.481878	1.56008	1.14703	OTX2										Postpiriform transition area	1/301	0.610012	0.611888	1.07311	0.530416	STAT3
																r6 part of ventral parvicellular reticular formation	1/301	0.479392	0.481878	1.56008	1.14703	KLF1										Postpiriform transition area, layers 3	1/301	0.610012	0.611888	1.07311	0.530416	STAT3
																r7 (gustatory) part of solitary complex	1/301	0.479392	0.481878	1.56008	1.14703	KLF1										Prelimbic area, layer 1	1/301	0.610012	0.611888	1.07311	0.530416	REST
																r7 basal plate	1/301	0.479392	0.481878	1.56008	1.14703	RUNX1										Prelimbic area, layer 5	1/301	0.610012	0.611888	1.07311	0.530416	GATA1
																r7 part of cochlear column	1/301	0.479392	0.481878	1.56008	1.14703	OTX2										Primary motor area, Layer 1	1/301	0.610012	0.611888	1.07311	0.530416	POU5F1
																r7 part of dorsal parvicellular reticular formation	1/301	0.479392	0.481878	1.56008	1.14703	KLF1										Primary somatosensory area, barrel field	1/301	0.610012	0.611888	1.07311	0.530416	KLF5
																r7 part of gigantocellular reticular area	1/301	0.479392	0.481878	1.56008	1.14703	RUNX1										Primary somatosensory area, barrel field, layer 1	1/301	0.610012	0.611888	1.07311	0.530416	KLF5
																r7 part of the dorsal cochlear nucleus	1/301	0.479392	0.481878	1.56008	1.14703	OTX2										Primary somatosensory area, barrel field, layer 2/3	1/301	0.610012	0.611888	1.07311	0.530416	KLF5
																r7 part of the nucleus of Roller	1/301	0.479392	0.481878	1.56008	1.14703	RUNX1										Primary somatosensory area, barrel field, layer 4	1/301	0.610012	0.611888	1.07311	0.530416	KLF5
																r7 part of the posteroventral cochlear nucleus	1/301	0.479392	0.481878	1.56008	1.14703	OTX2										Primary somatosensory area, barrel field, layer 5	1/301	0.610012	0.611888	1.07311	0.530416	BHLHE40
																r7 part of the trigeminal column	1/301	0.479392	0.481878	1.56008	1.14703	MYC										Primary somatosensory area, barrel field, layer 6b	1/301	0.610012	0.611888	1.07311	0.530416	KLF5
																r7 part of trigeminal transition zone	1/301	0.479392	0.481878	1.56008	1.14703	NFE2L2										Primary somatosensory area, lower limb, layer 5	1/301	0.610012	0.611888	1.07311	0.530416	BHLHE40
																r7 part of ventral gigangocellular reticular area	1/301	0.479392	0.481878	1.56008	1.14703	RUNX1										Primary somatosensory area, mouth, layer 1	1/301	0.610012	0.611888	1.07311	0.530416	NR2F6
																r8 (gustatory) part of solitary complex	1/301	0.479392	0.481878	1.56008	1.14703	KLF1										Primary somatosensory area, mouth, layer 2/3	1/301	0.610012	0.611888	1.07311	0.530416	REST
																r8 part of basomedial reticular formation	1/301	0.479392	0.481878	1.56008	1.14703	RUNX1										Primary somatosensory area, mouth, layer 4	1/301	0.610012	0.611888	1.07311	0.530416	REST
																r8 part of lateral reticular nucleus	1/301	0.479392	0.481878	1.56008	1.14703	NFE2L2										Primary somatosensory area, mouth, layer 5	1/301	0.610012	0.611888	1.07311	0.530416	BHLHE40
																r8 part of spinal trigeminal nucleus, interpolar part	1/301	0.479392	0.481878	1.56008	1.14703	NFE2L2										Primary somatosensory area, trunk, layer 1	1/301	0.610012	0.611888	1.07311	0.530416	FOXA3
																r8 part of the paragigantocellular nucleus	1/301	0.479392	0.481878	1.56008	1.14703	NFE2L2										Primary somatosensory area, trunk, layer 4	1/301	0.610012	0.611888	1.07311	0.530416	FOXA3
																r8 portion of ambiguous motor nucleus	1/301	0.479392	0.481878	1.56008	1.14703	NFE2L2										Primary somatosensory area, unassigned, layer 4	1/301	0.610012	0.611888	1.07311	0.530416	POU5F1
																r9 (gustatory) part of solitary complex	1/301	0.479392	0.481878	1.56008	1.14703	KLF1										Primary somatosensory area, unassigned, layer 5	1/301	0.610012	0.611888	1.07311	0.530416	BHLHE40
																r9 part of dorsal parvicellular reticular formation	1/301	0.479392	0.481878	1.56008	1.14703	KLF1										Primary somatosensory area, upper limb, layer 5	1/301	0.610012	0.611888	1.07311	0.530416	BHLHE40
																r9 part of external cuneate nucleus	1/301	0.479392	0.481878	1.56008	1.14703	KLF1										Primary somatosensory area, upper limb, layer 6a	1/301	0.610012	0.611888	1.07311	0.530416	BHLHE40
																r9 part of nucleus gracilis	1/301	0.479392	0.481878	1.56008	1.14703	GATA2										Primary somatosensory area, upper limb, layer 6b	1/301	0.610012	0.611888	1.07311	0.530416	NR3C1
																r9 part of paragigantocellular nucleus	1/301	0.479392	0.481878	1.56008	1.14703	NFE2L2										Pyramus (VIII)	1/301	0.610012	0.611888	1.07311	0.530416	NEUROD1
																r9 part of parvocellular medial vestibular nucleus	1/301	0.479392	0.481878	1.56008	1.14703	KLF1										Pyramus (VIII), granular layer	1/301	0.610012	0.611888	1.07311	0.530416	NEUROD1
																r9 part of spinal trigeminal nucleus, interpolar part	1/301	0.479392	0.481878	1.56008	1.14703	NFE2L2										Pyramus (VIII), molecular layer	1/301	0.610012	0.611888	1.07311	0.530416	NEUROD1
																r9 part of the inferior olive	1/301	0.479392	0.481878	1.56008	1.14703	NFE2L2										Retrochiasmatic area	1/301	0.610012	0.611888	1.07311	0.530416	AR
																r9 part of the lateral reticular nucleus	1/301	0.479392	0.481878	1.56008	1.14703	NFE2L2										Retrosplenial area, dorsal part, layer 1	1/301	0.610012	0.611888	1.07311	0.530416	HNF1A
																red nucleus, magnocellular part	1/301	0.479392	0.481878	1.56008	1.14703	FOXA1										Retrosplenial area, ventral part, layer 6b	1/301	0.610012	0.611888	1.07311	0.530416	ETV5
																reticular formation of CoPL	1/301	0.479392	0.481878	1.56008	1.14703	TCF7L2										Secondary motor area, layer 5	1/301	0.610012	0.611888	1.07311	0.530416	PRDM1
																reticular formation of JcPL	1/301	0.479392	0.481878	1.56008	1.14703	TCF7L2										Spinal nucleus of the trigeminal, oral part, rostral dorsomedial part	1/301	0.610012	0.611888	1.07311	0.530416	PHOX2B
																reticular formation of basal m2	1/301	0.479392	0.481878	1.56008	1.14703	EBF3										Subiculum, dorsal part, stratum radiatum	1/301	0.610012	0.611888	1.07311	0.530416	BHLHE40
																reticular formation of p1Lim	1/301	0.479392	0.481878	1.56008	1.14703	TCF7L2										Subiculum, ventral part, pyramidal layer	1/301	0.610012	0.611888	1.07311	0.530416	FOSL2
																reticular formation of p2Lim	1/301	0.479392	0.481878	1.56008	1.14703	TCF7L2										Sublaterodorsal nucleus	1/301	0.610012	0.611888	1.07311	0.530416	KLF1
																retromammillary area	1/301	0.479392	0.481878	1.56008	1.14703	FOXA1										Substantia innominata	1/301	0.610012	0.611888	1.07311	0.530416	GATA3
																retromammillary area, lateral part	1/301	0.479392	0.481878	1.56008	1.14703	FOXA1										Supplemental somatosensory area	1/301	0.610012	0.611888	1.07311	0.530416	RUNX1
																retromammillary area, medial part	1/301	0.479392	0.481878	1.56008	1.14703	FOXA1										Supplemental somatosensory area, layer 6b	1/301	0.610012	0.611888	1.07311	0.530416	RUNX1
																rhombomere 11	1/301	0.479392	0.481878	1.56008	1.14703	NFE2L2										Taenia tecta, dorsal part, layer 3	1/301	0.610012	0.611888	1.07311	0.530416	FOSL2
																rhombomere 6	1/301	0.479392	0.481878	1.56008	1.14703	MYC										Tegmental reticular nucleus	1/301	0.610012	0.611888	1.07311	0.530416	ELF4
																rostral interpeduncular nucleus	1/301	0.479392	0.481878	1.56008	1.14703	FOXA1										Temporal association areas, layer 5	1/301	0.610012	0.611888	1.07311	0.530416	NR3C1
																rostral periolivary nucleus	1/301	0.479392	0.481878	1.56008	1.14703	MYC										Temporal association areas, layer 6a	1/301	0.610012	0.611888	1.07311	0.530416	NR3C1
																rostral ventrolateral reticular area	1/301	0.479392	0.481878	1.56008	1.14703	NFE2L2										Tuberomammillary nucleus, ventral part	1/301	0.610012	0.611888	1.07311	0.530416	SMAD2
																rostromedial tegmental nucleus	1/301	0.479392	0.481878	1.56008	1.14703	RARA										Ventral part of the lateral geniculate complex	1/301	0.610012	0.611888	1.07311	0.530416	LEF1
																secondary prosencephalon	1/301	0.479392	0.481878	1.56008	1.14703	EOMES										Ventromedial hypothalamic nucleus, ventrolateral part	1/301	0.610012	0.611888	1.07311	0.530416	AR
																septodiagonal transition area	1/301	0.479392	0.481878	1.56008	1.14703	AR										Vermal regions	1/301	0.610012	0.611888	1.07311	0.530416	NEUROD1
																subcuneiform nucleus	1/301	0.479392	0.481878	1.56008	1.14703	HNF1A										accessory entopeduncular nucleus (post-migratory)	1/301	0.610012	0.611888	1.07311	0.530416	NFE2L2
																sublayer 6a of InsCx	1/301	0.479392	0.481878	1.56008	1.14703	FLI1										accumbens nucleus, core domain	1/301	0.610012	0.611888	1.07311	0.530416	SPDEF
																sublayer 6a of PCx	1/301	0.479392	0.481878	1.56008	1.14703	BHLHE40										accumbens nucleus, shell domain	1/301	0.610012	0.611888	1.07311	0.530416	GATA2
																sublayer 6b of FCx	1/301	0.479392	0.481878	1.56008	1.14703	NR3C1										anterior cortical amygdaloid area	1/301	0.610012	0.611888	1.07311	0.530416	VDR
																sublayer 6b of InsCx	1/301	0.479392	0.481878	1.56008	1.14703	FLI1										anterior digastric muscle trigeminal motor cell group	1/301	0.610012	0.611888	1.07311	0.530416	FOXA2
																subpretectal nucleus	1/301	0.479392	0.481878	1.56008	1.14703	TCF7L2										anterior pretectal nucleus, dorsal superficial part	1/301	0.610012	0.611888	1.07311	0.530416	TCF7L2
																substantia innominata/basal nucleus, transitional part	1/301	0.479392	0.481878	1.56008	1.14703	AR										anterior pretectal nucleus, ventral core part	1/301	0.610012	0.611888	1.07311	0.530416	TCF7L2
																substantia nigra compacta, m1 part	1/301	0.479392	0.481878	1.56008	1.14703	FOXA1										anterior pretectal nucleus, ventral superficial part	1/301	0.610012	0.611888	1.07311	0.530416	TCF7L2
																substantia nigra reticulata, isthmic part	1/301	0.479392	0.481878	1.56008	1.14703	FOXA1										basolateral amygdaloid nucleus, ventral part	1/301	0.610012	0.611888	1.07311	0.530416	WT1
																substantia nigra reticulata, m1 part	1/301	0.479392	0.481878	1.56008	1.14703	FOXA1										caudal interpeduncular nucleus	1/301	0.610012	0.611888	1.07311	0.530416	ELF4
																superficial part of arcuate nucleus	1/301	0.479392	0.481878	1.56008	1.14703	KLF4										caudal linear (raphe) nucleus	1/301	0.610012	0.611888	1.07311	0.530416	FOXA1
																superficial stratum of AOB	1/301	0.479392	0.481878	1.56008	1.14703	EOMES										caudal zona incerta	1/301	0.610012	0.611888	1.07311	0.530416	TCF7L2
																superficial stratum of CCx (cortical plate/marginal zone)	1/301	0.479392	0.481878	1.56008	1.14703	ERG										cingulate cortex	1/301	0.610012	0.611888	1.07311	0.530416	ERG
																superficial stratum of CoPV	1/301	0.479392	0.481878	1.56008	1.14703	TCF7L2										corticoid layer of TuPal	1/301	0.610012	0.611888	1.07311	0.530416	NFE2
																superficial stratum of Hb	1/301	0.479392	0.481878	1.56008	1.14703	OTX2										dorsal nucleus of the lateral lemniscus	1/301	0.610012	0.611888	1.07311	0.530416	NEUROD1
																superficial stratum of OB	1/301	0.479392	0.481878	1.56008	1.14703	EOMES										dorsal part of PHyB	1/301	0.610012	0.611888	1.07311	0.530416	ESR1
																superficial stratum of PHyB-P	1/301	0.479392	0.481878	1.56008	1.14703	FOXA1										dorsomedial tegmental nucleus	1/301	0.610012	0.611888	1.07311	0.530416	KLF1
																superficial stratum of Pal	1/301	0.479392	0.481878	1.56008	1.14703	NFE2										external globus pallidum	1/301	0.610012	0.611888	1.07311	0.530416	EGR3
																superficial stratum of PcPL	1/301	0.479392	0.481878	1.56008	1.14703	TCF7L2										frontal cortex	1/301	0.610012	0.611888	1.07311	0.530416	PRDM1
																superficial stratum of PcPV	1/301	0.479392	0.481878	1.56008	1.14703	TCF7L2										intermediate mantle of isBM	1/301	0.610012	0.611888	1.07311	0.530416	FOXA1
																superficial stratum of RtC	1/301	0.479392	0.481878	1.56008	1.14703	FOXA2										intermediate part of r2B	1/301	0.610012	0.611888	1.07311	0.530416	KLF1
																superficial stratum of TG	1/301	0.479392	0.481878	1.56008	1.14703	SPDEF										intermediate part of r3B	1/301	0.610012	0.611888	1.07311	0.530416	KLF1
																superficial stratum of THyB-I	1/301	0.479392	0.481878	1.56008	1.14703	AR										intermediate pretectal nucleus	1/301	0.610012	0.611888	1.07311	0.530416	TCF7L2
																superficial stratum of THyB-V	1/301	0.479392	0.481878	1.56008	1.14703	AR										intermediate stratum of CoPL	1/301	0.610012	0.611888	1.07311	0.530416	TCF7L2
																superficial stratum of TPaA	1/301	0.479392	0.481878	1.56008	1.14703	SOX17										intermediate stratum of CoPV	1/301	0.610012	0.611888	1.07311	0.530416	TCF7L2
																superficial stratum of TTe	1/301	0.479392	0.481878	1.56008	1.14703	SOX17										intermediate stratum of Ist	1/301	0.610012	0.611888	1.07311	0.530416	NEUROD1
																superficial stratum of isBI	1/301	0.479392	0.481878	1.56008	1.14703	FOXA1										intermediate stratum of JcPL	1/301	0.610012	0.611888	1.07311	0.530416	TCF7L2
																superficial stratum of m1B	1/301	0.479392	0.481878	1.56008	1.14703	FOXA1										intermediate stratum of JcPV	1/301	0.610012	0.611888	1.07311	0.530416	TCF7L2
																superficial stratum of m2B	1/301	0.479392	0.481878	1.56008	1.14703	FOXA1										intermediate stratum of LPrP	1/301	0.610012	0.611888	1.07311	0.530416	FLI1
																superficial stratum of p1B	1/301	0.479392	0.481878	1.56008	1.14703	FOXA1										intermediate stratum of PHyB-D	1/301	0.610012	0.611888	1.07311	0.530416	ESR1
																superficial stratum of p2B	1/301	0.479392	0.481878	1.56008	1.14703	FOXA1										intermediate stratum of POH	1/301	0.610012	0.611888	1.07311	0.530416	ESR1
																superficial stratum of p3B	1/301	0.479392	0.481878	1.56008	1.14703	FOXA1										intermediate stratum of PPaA	1/301	0.610012	0.611888	1.07311	0.530416	ESR1
																superficial stratum of r10BM	1/301	0.479392	0.481878	1.56008	1.14703	NFE2L2										intermediate stratum of Pal	1/301	0.610012	0.611888	1.07311	0.530416	EGR3
																superficial stratum of r11Tr	1/301	0.479392	0.481878	1.56008	1.14703	NFE2										intermediate stratum of PalSe	1/301	0.610012	0.611888	1.07311	0.530416	SOX2
																superficial stratum of r1BI	1/301	0.479392	0.481878	1.56008	1.14703	POU5F1										intermediate stratum of PcPV	1/301	0.610012	0.611888	1.07311	0.530416	TCF7L2
																superficial stratum of r1BM	1/301	0.479392	0.481878	1.56008	1.14703	FOXA1										intermediate stratum of SeDg	1/301	0.610012	0.611888	1.07311	0.530416	AR
																superficial stratum of r2BI	1/301	0.479392	0.481878	1.56008	1.14703	POU5F1										intermediate stratum of SeStr	1/301	0.610012	0.611888	1.07311	0.530416	GATA2
																superficial stratum of r2BM	1/301	0.479392	0.481878	1.56008	1.14703	RARA										intermediate stratum of THyB-V	1/301	0.610012	0.611888	1.07311	0.530416	ESR1
																superficial stratum of r2Lim	1/301	0.479392	0.481878	1.56008	1.14703	SPDEF										intermediate stratum of TSPaA	1/301	0.610012	0.611888	1.07311	0.530416	ESR1
																superficial stratum of r3Tr	1/301	0.479392	0.481878	1.56008	1.14703	EBF3										intermediate stratum of m1B	1/301	0.610012	0.611888	1.07311	0.530416	FOXA1
																superficial stratum of r4BI	1/301	0.479392	0.481878	1.56008	1.14703	HOXB13										intermediate stratum of p1Lim	1/301	0.610012	0.611888	1.07311	0.530416	TCF7L2
																superficial stratum of r4Ve	1/301	0.479392	0.481878	1.56008	1.14703	HNF1A										intermediate stratum of r10Ve	1/301	0.610012	0.611888	1.07311	0.530416	PHOX2B
																superficial stratum of r5BI	1/301	0.479392	0.481878	1.56008	1.14703	FOXA2										intermediate stratum of r1BM	1/301	0.610012	0.611888	1.07311	0.530416	FOXA1
																superficial stratum of r5BL	1/301	0.479392	0.481878	1.56008	1.14703	MYC										intermediate stratum of r1Lim	1/301	0.610012	0.611888	1.07311	0.530416	SPDEF
																superficial stratum of r5Co	1/301	0.479392	0.481878	1.56008	1.14703	SOX17										intermediate stratum of r1Ve	1/301	0.610012	0.611888	1.07311	0.530416	PHOX2B
																superficial stratum of r6Lim	1/301	0.479392	0.481878	1.56008	1.14703	NFE2L2										intermediate stratum of r2BI	1/301	0.610012	0.611888	1.07311	0.530416	KLF1
																superficial stratum of r6Ve	1/301	0.479392	0.481878	1.56008	1.14703	OTX2										intermediate stratum of r2BL	1/301	0.610012	0.611888	1.07311	0.530416	KLF1
																superficial stratum of r7BL	1/301	0.479392	0.481878	1.56008	1.14703	NFE2L2										intermediate stratum of r2Tr	1/301	0.610012	0.611888	1.07311	0.530416	SPDEF
																superficial stratum of r7Co	1/301	0.479392	0.481878	1.56008	1.14703	OTX2										intermediate stratum of r3BI	1/301	0.610012	0.611888	1.07311	0.530416	KLF1
																superficial stratum of r8BI	1/301	0.479392	0.481878	1.56008	1.14703	NFE2L2										intermediate stratum of r3BL	1/301	0.610012	0.611888	1.07311	0.530416	KLF1
																superficial stratum of r8Lim	1/301	0.479392	0.481878	1.56008	1.14703	NFE2L2										intermediate stratum of r3BM	1/301	0.610012	0.611888	1.07311	0.530416	ELF4
																superficial stratum of r8Tr	1/301	0.479392	0.481878	1.56008	1.14703	NFE2L2										intermediate stratum of r3Tr	1/301	0.610012	0.611888	1.07311	0.530416	PHOX2B
																superficial stratum of r9BI	1/301	0.479392	0.481878	1.56008	1.14703	NFE2L2										intermediate stratum of r4BI	1/301	0.610012	0.611888	1.07311	0.530416	KLF1
																superficial stratum of r9BM	1/301	0.479392	0.481878	1.56008	1.14703	NFE2L2										intermediate stratum of r4BL	1/301	0.610012	0.611888	1.07311	0.530416	KLF1
																superficial stratum of r9Tr	1/301	0.479392	0.481878	1.56008	1.14703	NFE2L2										intermediate stratum of r6Lim	1/301	0.610012	0.611888	1.07311	0.530416	KLF1
																superficial stratum of r9Ve	1/301	0.479392	0.481878	1.56008	1.14703	KLF1										intermediate stratum of r7BI	1/301	0.610012	0.611888	1.07311	0.530416	ELF4
																superficial stratum of the VAP	1/301	0.479392	0.481878	1.56008	1.14703	NR2F1										internal globus pallidus	1/301	0.610012	0.611888	1.07311	0.530416	LEF1
																superior periolivary nucleus	1/301	0.479392	0.481878	1.56008	1.14703	MYC										island of Calleja major	1/301	0.610012	0.611888	1.07311	0.530416	GATA2
																supragenual nucleus	1/301	0.479392	0.481878	1.56008	1.14703	HOXB13										lambdoid septal zone	1/301	0.610012	0.611888	1.07311	0.530416	REST
																telencephalic vesicle	1/301	0.479392	0.481878	1.56008	1.14703	EOMES										lateral TG part of the periaqueductal gray	1/301	0.610012	0.611888	1.07311	0.530416	TCF7L2
																temporotympanic muscle trigeminal motor cell group	1/301	0.479392	0.481878	1.56008	1.14703	SPDEF										lateral amygdaloid nucleus	1/301	0.610012	0.611888	1.07311	0.530416	OTX2
																terminal hypothalamus (rostral hypothalamus)	1/301	0.479392	0.481878	1.56008	1.14703	ESR1										lateral anterior hypothalamic nucleus	1/301	0.610012	0.611888	1.07311	0.530416	ESR1
																terminal paraventricular area of THyA	1/301	0.479392	0.481878	1.56008	1.14703	ESR1										lateral part of r1B	1/301	0.610012	0.611888	1.07311	0.530416	PHOX2B
																terminal subparaventricular area of THyA	1/301	0.479392	0.481878	1.56008	1.14703	ESR1										lateral part of r3B	1/301	0.610012	0.611888	1.07311	0.530416	KLF1
																upper basal lateral hypothalamic area	1/301	0.479392	0.481878	1.56008	1.14703	EBF3										lateral part of r4B	1/301	0.610012	0.611888	1.07311	0.530416	KLF1
																upper basal perifornical nucleus	1/301	0.479392	0.481878	1.56008	1.14703	AR										lateral part of r6B	1/301	0.610012	0.611888	1.07311	0.530416	FOXA3
																upper dorsal perifornical nucleus	1/301	0.479392	0.481878	1.56008	1.14703	ESR1										lateral septal nucleus, intermedio-intermediate part	1/301	0.610012	0.611888	1.07311	0.530416	SOX2
																ventral juxtacommissural pretectal nucleus	1/301	0.479392	0.481878	1.56008	1.14703	TCF7L2										lateral terminal nucleus of the accessory optic tract, ventral part	1/301	0.610012	0.611888	1.07311	0.530416	TCF7L2
																ventral pallium	1/301	0.479392	0.481878	1.56008	1.14703	EOMES										lateral wings of the dorsal raphe nucleus	1/301	0.610012	0.611888	1.07311	0.530416	EBF3
																ventral part of JcP	1/301	0.479392	0.481878	1.56008	1.14703	TCF7L2										lateropallial prepiriform area	1/301	0.610012	0.611888	1.07311	0.530416	FLI1
																ventral part of PHyB	1/301	0.479392	0.481878	1.56008	1.14703	SOX2										layer 1 of InsCx	1/301	0.610012	0.611888	1.07311	0.530416	HNF1A
																ventral part of PcP	1/301	0.479392	0.481878	1.56008	1.14703	TCF7L2										layer 1 of LOT	1/301	0.610012	0.611888	1.07311	0.530416	HNF4G
																ventral part of THyB	1/301	0.479392	0.481878	1.56008	1.14703	ESR1										layer 1 of LPrP cortex	1/301	0.610012	0.611888	1.07311	0.530416	HNF1A
																ventral tuberomammillary nucleus, intermediate part (histaminergic)	1/301	0.479392	0.481878	1.56008	1.14703	ESR1										layer 1 of PrS	1/301	0.610012	0.611888	1.07311	0.530416	MNT
																ventral tuberomammillary nucleus, superficial part (histaminergic)	1/301	0.479392	0.481878	1.56008	1.14703	AR										layer 2 of ERCx	1/301	0.610012	0.611888	1.07311	0.530416	KLF5
																ventrolateral part of VMH	1/301	0.479392	0.481878	1.56008	1.14703	AR										layer 2 of InsCx	1/301	0.610012	0.611888	1.07311	0.530416	HNF1A
																vertical nucleus of the diagonal band	1/301	0.479392	0.481878	1.56008	1.14703	ESR1										layer 2 of LOT	1/301	0.610012	0.611888	1.07311	0.530416	HNF4G
																Accessory olfactory bulb	1/379	0.561125	0.56371	1.23325	0.712583	EOMES										layer 2 of LPrP cortex	1/301	0.610012	0.611888	1.07311	0.530416	FLI1
																Lateral mammillary nucleus	1/384	0.565914	0.568193	1.21683	0.69276	FOXA1										layer 3 of ERCx	1/301	0.610012	0.611888	1.07311	0.530416	KLF5
																Claustrum	1/386	0.567815	0.569774	1.21039	0.685032	FLI1										layer 3 of FCx	1/301	0.610012	0.611888	1.07311	0.530416	PRDM1
																Ventral tegmental nucleus	1/391	0.572532	0.574177	1.19457	0.666194	SOX2										layer 3 of InsCx	1/301	0.610012	0.611888	1.07311	0.530416	FLI1
																Field CA2, stratum lacunosum-moleculare	1/421	0.599797	0.601175	1.10754	0.566135	TCF4										layer 4 of InsCx	1/301	0.610012	0.611888	1.07311	0.530416	HNF1A
																Tuberal nucleus	1/427	0.605042	0.606084	1.09161	0.548485	AR										layer 4 of PCx	1/301	0.610012	0.611888	1.07311	0.530416	FOXA3
																Taenia tecta	1/448	0.622878	0.623592	1.0392	0.491964	SOX17										layer 5 of CCx	1/301	0.610012	0.611888	1.07311	0.530416	ERG
																Anterior tegmental nucleus	1/552	0.700238	0.700639	0.838562	0.298809	FOXA1										layer 5 of InsCx	1/301	0.610012	0.611888	1.07311	0.530416	FLI1
																intermediate stratum of DG	1/597	0.728688	0.728688	0.77345	0.244805	LEF1										layer 5 of PCx	1/301	0.610012	0.611888	1.07311	0.530416	BHLHE40
																																layer 6 of CCx	1/301	0.610012	0.611888	1.07311	0.530416	ETV5
																																layer 6 of PCx	1/301	0.610012	0.611888	1.07311	0.530416	BHLHE40
																																liminal part of alar p2	1/301	0.610012	0.611888	1.07311	0.530416	TCF7L2
																																liminal part of alar r1	1/301	0.610012	0.611888	1.07311	0.530416	SPDEF
																																m1 part of parabrachialis pigmentosus	1/301	0.610012	0.611888	1.07311	0.530416	FOXA1
																																m2 part of nucleus parabrachialis pigmentosus	1/301	0.610012	0.611888	1.07311	0.530416	FOXA1
																																m2 part of substantia nigra compacta	1/301	0.610012	0.611888	1.07311	0.530416	FOXA1
																																magnocellular interstitial nucleus of the posterior commissure	1/301	0.610012	0.611888	1.07311	0.530416	TCF7L2
																																mantle zone of CCx	1/301	0.610012	0.611888	1.07311	0.530416	ERG
																																mantle zone of FCx	1/301	0.610012	0.611888	1.07311	0.530416	PRDM1
																																mantle zone of JcPV	1/301	0.610012	0.611888	1.07311	0.530416	TCF7L2
																																mantle zone of LPrP	1/301	0.610012	0.611888	1.07311	0.530416	FLI1
																																mantle zone of PHyB-D	1/301	0.610012	0.611888	1.07311	0.530416	ESR1
																																mantle zone of PHyB-V	1/301	0.610012	0.611888	1.07311	0.530416	SOX2
																																mantle zone of POH	1/301	0.610012	0.611888	1.07311	0.530416	ESR1
																																mantle zone of PPaA	1/301	0.610012	0.611888	1.07311	0.530416	ESR1
																																mantle zone of Pal	1/301	0.610012	0.611888	1.07311	0.530416	EGR3
																																mantle zone of PalSe	1/301	0.610012	0.611888	1.07311	0.530416	SOX2
																																mantle zone of PcPV	1/301	0.610012	0.611888	1.07311	0.530416	TCF7L2
																																mantle zone of SeDg	1/301	0.610012	0.611888	1.07311	0.530416	AR
																																mantle zone of THyB-V	1/301	0.610012	0.611888	1.07311	0.530416	ESR1
																																mantle zone of TPaA	1/301	0.610012	0.611888	1.07311	0.530416	ESR1
																																mantle zone of TSPaA	1/301	0.610012	0.611888	1.07311	0.530416	ESR1
																																mantle zone of TTe	1/301	0.610012	0.611888	1.07311	0.530416	SOX17
																																mantle zone of p2Lim	1/301	0.610012	0.611888	1.07311	0.530416	TCF7L2
																																mantle zone of r10Ve	1/301	0.610012	0.611888	1.07311	0.530416	PHOX2B
																																mantle zone of r11Tr	1/301	0.610012	0.611888	1.07311	0.530416	NFE2
																																mantle zone of r1BL	1/301	0.610012	0.611888	1.07311	0.530416	PHOX2B
																																mantle zone of r1BM	1/301	0.610012	0.611888	1.07311	0.530416	FOXA1
																																mantle zone of r1Lim	1/301	0.610012	0.611888	1.07311	0.530416	SPDEF
																																mantle zone of r1Ve	1/301	0.610012	0.611888	1.07311	0.530416	PHOX2B
																																mantle zone of r2BI	1/301	0.610012	0.611888	1.07311	0.530416	KLF1
																																mantle zone of r3BI	1/301	0.610012	0.611888	1.07311	0.530416	KLF1
																																mantle zone of r3BL	1/301	0.610012	0.611888	1.07311	0.530416	KLF1
																																mantle zone of r3BM	1/301	0.610012	0.611888	1.07311	0.530416	ELF4
																																mantle zone of r3Tr	1/301	0.610012	0.611888	1.07311	0.530416	PHOX2B
																																mantle zone of r4BL	1/301	0.610012	0.611888	1.07311	0.530416	KLF1
																																mantle zone of r6BL	1/301	0.610012	0.611888	1.07311	0.530416	FOXA3
																																mantle zone of r7Co	1/301	0.610012	0.611888	1.07311	0.530416	OTX2
																																medial pallium (hippocampal allocortex)	1/301	0.610012	0.611888	1.07311	0.530416	TCF4
																																medial part of r1B	1/301	0.610012	0.611888	1.07311	0.530416	FOXA1
																																medial part of r3B	1/301	0.610012	0.611888	1.07311	0.530416	ELF4
																																nucleus of Barrington	1/301	0.610012	0.611888	1.07311	0.530416	EBF3
																																nucleus of the inferior collicular brachium, caudal part	1/301	0.610012	0.611888	1.07311	0.530416	GATA4
																																nucleus subcoeruleus, r1 part	1/301	0.610012	0.611888	1.07311	0.530416	KLF1
																																oculomotor nucleus, Edinger-Westphal subnucleus	1/301	0.610012	0.611888	1.07311	0.530416	REST
																																oculomotor nucleus, main part	1/301	0.610012	0.611888	1.07311	0.530416	REST
																																p1 part of the substantia nigra reticulata	1/301	0.610012	0.611888	1.07311	0.530416	FOXA1
																																p1Lim part of periaqueductal gray	1/301	0.610012	0.611888	1.07311	0.530416	TCF7L2
																																pallidal part of olfactory tuberculum	1/301	0.610012	0.611888	1.07311	0.530416	NFE2
																																pallidal septum	1/301	0.610012	0.611888	1.07311	0.530416	SOX2
																																pallidum (globus pallidus complex)	1/301	0.610012	0.611888	1.07311	0.530416	EGR3
																																pararubral nucleus, m1 part	1/301	0.610012	0.611888	1.07311	0.530416	FOXA1
																																paraventricular nucleus, lateral part	1/301	0.610012	0.611888	1.07311	0.530416	ERG
																																parvicellular part of Lat	1/301	0.610012	0.611888	1.07311	0.530416	NEUROD1
																																peduncular paraventricular area of PHyA	1/301	0.610012	0.611888	1.07311	0.530416	ESR1
																																periventricular stratum of PcPV	1/301	0.610012	0.611888	1.07311	0.530416	TCF7L2
																																periventricular stratum of SeStr	1/301	0.610012	0.611888	1.07311	0.530416	SPDEF
																																periventricular stratum of isLim	1/301	0.610012	0.611888	1.07311	0.530416	EBF3
																																periventricular stratum of p1Lim	1/301	0.610012	0.611888	1.07311	0.530416	TCF7L2
																																periventricular stratum of r1BM	1/301	0.610012	0.611888	1.07311	0.530416	SOX2
																																periventricular stratum of r2BM	1/301	0.610012	0.611888	1.07311	0.530416	FOXA3
																																periventricular stratum of r2Lim	1/301	0.610012	0.611888	1.07311	0.530416	FOXA3
																																periventricular stratum of r3Co	1/301	0.610012	0.611888	1.07311	0.530416	OTX2
																																periventricular stratum of r3Lim	1/301	0.610012	0.611888	1.07311	0.530416	FOXA3
																																periventricular stratum of r4Co	1/301	0.610012	0.611888	1.07311	0.530416	OTX2
																																periventricular stratum of r5Co	1/301	0.610012	0.611888	1.07311	0.530416	OTX2
																																periventricular stratum of r7Co	1/301	0.610012	0.611888	1.07311	0.530416	OTX2
																																plexiform layer of TuPal	1/301	0.610012	0.611888	1.07311	0.530416	NFE2
																																polymorph layer of TuStr	1/301	0.610012	0.611888	1.07311	0.530416	GATA2
																																posterior part of anterior hypothalamic nucleus	1/301	0.610012	0.611888	1.07311	0.530416	ESR1
																																posterobasal nucleus, intermediate part	1/301	0.610012	0.611888	1.07311	0.530416	ESR1
																																posterodorsal tegmental nucleus	1/301	0.610012	0.611888	1.07311	0.530416	FOXA3
																																preopto-hypothalamic area	1/301	0.610012	0.611888	1.07311	0.530416	ESR1
																																preopto-hypothalamic band	1/301	0.610012	0.611888	1.07311	0.530416	ESR1
																																pterigoid muscle trigeminal motor cell group	1/301	0.610012	0.611888	1.07311	0.530416	FOXA2
																																putamen	1/301	0.610012	0.611888	1.07311	0.530416	FOXO1
																																r1 basal plate	1/301	0.610012	0.611888	1.07311	0.530416	FOXA1
																																r1 part of basomedial reticular formation	1/301	0.610012	0.611888	1.07311	0.530416	FOXA1
																																r1 part of dorsal raphe nucleus	1/301	0.610012	0.611888	1.07311	0.530416	SOX2
																																r1 part of lateral pontine nuclei	1/301	0.610012	0.611888	1.07311	0.530416	POU5F1
																																r1 part of superior vestibular nucleus	1/301	0.610012	0.611888	1.07311	0.530416	PHOX2B
																																r1 part of the 'mesencephalic' trigeminal nucleus	1/301	0.610012	0.611888	1.07311	0.530416	PHOX2B
																																r1 part of ventral parvicellular reticular formation	1/301	0.610012	0.611888	1.07311	0.530416	SPDEF
																																r1 part of vestibular sensory column	1/301	0.610012	0.611888	1.07311	0.530416	PHOX2B
																																r10 part of spinal vestibular nucleus	1/301	0.610012	0.611888	1.07311	0.530416	PHOX2B
																																r10 part of the inferior olive	1/301	0.610012	0.611888	1.07311	0.530416	NFE2L2
																																r10 part of the vestibular column	1/301	0.610012	0.611888	1.07311	0.530416	PHOX2B
																																r11 part of spinal trigeminal nucleus, caudal part	1/301	0.610012	0.611888	1.07311	0.530416	NFE2
																																r11 part of the trigeminal column	1/301	0.610012	0.611888	1.07311	0.530416	NFE2
																																r2 liminal central gray	1/301	0.610012	0.611888	1.07311	0.530416	FOXA3
																																r2 part of basointermediate reticular formation	1/301	0.610012	0.611888	1.07311	0.530416	KLF1
																																r2 part of basomedial reticular formation	1/301	0.610012	0.611888	1.07311	0.530416	ELF4
																																r2 part of dorsal parvicellular reticular formation	1/301	0.610012	0.611888	1.07311	0.530416	SPDEF
																																r2 part of lateral pontine nuclei	1/301	0.610012	0.611888	1.07311	0.530416	POU5F1
																																r2 part of nucleus subcoeruleus	1/301	0.610012	0.611888	1.07311	0.530416	KLF1
																																r2 part of prepontine raphe nucleus	1/301	0.610012	0.611888	1.07311	0.530416	RUNX1
																																r2 part of the trigeminal motor nucleus	1/301	0.610012	0.611888	1.07311	0.530416	SPDEF
																																r2 part of trigeminal transition zone	1/301	0.610012	0.611888	1.07311	0.530416	PHOX2B
																																r3 alar plate	1/301	0.610012	0.611888	1.07311	0.530416	PHOX2B
																																r3 basal plate	1/301	0.610012	0.611888	1.07311	0.530416	ELF4
																																r3 liminal central gray	1/301	0.610012	0.611888	1.07311	0.530416	FOXA3
																																r3 part of basointermediate reticular formation	1/301	0.610012	0.611888	1.07311	0.530416	KLF1
																																r3 part of basolateral reticular formation	1/301	0.610012	0.611888	1.07311	0.530416	KLF1
																																r3 part of dorsal cochlear nucleus	1/301	0.610012	0.611888	1.07311	0.530416	OTX2
																																r3 part of dorsal parvicellular reticular formation	1/301	0.610012	0.611888	1.07311	0.530416	PHOX2B
																																r3 part of lateral pontine nuclei	1/301	0.610012	0.611888	1.07311	0.530416	SMAD2
																																r3 part of medial pontine nuclei	1/301	0.610012	0.611888	1.07311	0.530416	ELF4
																																r3 part of reticulotegmental nucleus, shell portion	1/301	0.610012	0.611888	1.07311	0.530416	ELF4
																																r3 part of trigeminal sensory column	1/301	0.610012	0.611888	1.07311	0.530416	PHOX2B
																																r3 part of trigeminal transition zone	1/301	0.610012	0.611888	1.07311	0.530416	PHOX2B
																																r3 part of ventral lateral lemniscal nucleus	1/301	0.610012	0.611888	1.07311	0.530416	SMAD2
																																r4 part of basointermediate reticular formation	1/301	0.610012	0.611888	1.07311	0.530416	KLF1
																																r4 part of basolateral reticular formation	1/301	0.610012	0.611888	1.07311	0.530416	KLF1
																																r4 part of descending trigeminal sensory nucleus, oral part	1/301	0.610012	0.611888	1.07311	0.530416	PHOX2B
																																r4 part of dorsal cochlear nucleus	1/301	0.610012	0.611888	1.07311	0.530416	OTX2
																																r4 part of medial pontine nuclei	1/301	0.610012	0.611888	1.07311	0.530416	ELF4
																																r5 part of dorsal cochlear nucleus	1/301	0.610012	0.611888	1.07311	0.530416	OTX2
																																r5 part of the oral Sp5 subnucleus	1/301	0.610012	0.611888	1.07311	0.530416	PHOX2B
																																r5 part of ventral lateral lemniscal nucleus	1/301	0.610012	0.611888	1.07311	0.530416	NFIL3
																																r6 alar plate	1/301	0.610012	0.611888	1.07311	0.530416	PHOX2B
																																r6 part of spinal trigeminal nucleus, pars oralis	1/301	0.610012	0.611888	1.07311	0.530416	PHOX2B
																																r6 part of ventral gigangocellular reticular area	1/301	0.610012	0.611888	1.07311	0.530416	ELF4
																																r6 part of ventral parvicellular reticular formation	1/301	0.610012	0.611888	1.07311	0.530416	KLF1
																																r7 part of basomedial reticular formation	1/301	0.610012	0.611888	1.07311	0.530416	ELF4
																																r7 part of cochlear column	1/301	0.610012	0.611888	1.07311	0.530416	OTX2
																																r7 part of dorsal parvicellular reticular formation	1/301	0.610012	0.611888	1.07311	0.530416	KLF1
																																r7 part of the basointermediate reticular formation	1/301	0.610012	0.611888	1.07311	0.530416	ELF4
																																r7 part of the dorsal cochlear nucleus	1/301	0.610012	0.611888	1.07311	0.530416	OTX2
																																r7 part of the posteroventral cochlear nucleus	1/301	0.610012	0.611888	1.07311	0.530416	OTX2
																																r8 part of lateral reticular nucleus	1/301	0.610012	0.611888	1.07311	0.530416	NFE2L2
																																r9 part of dorsal parvicellular reticular formation	1/301	0.610012	0.611888	1.07311	0.530416	KLF1
																																r9 part of the lateral reticular nucleus	1/301	0.610012	0.611888	1.07311	0.530416	NFE2L2
																																red nucleus, magnocellular part	1/301	0.610012	0.611888	1.07311	0.530416	FOXA1
																																reticular formation of CoPL	1/301	0.610012	0.611888	1.07311	0.530416	TCF7L2
																																reticular formation of JcPL	1/301	0.610012	0.611888	1.07311	0.530416	TCF7L2
																																reticular formation of basal m2	1/301	0.610012	0.611888	1.07311	0.530416	EBF3
																																reticular formation of p1Lim	1/301	0.610012	0.611888	1.07311	0.530416	TCF7L2
																																rhombomere 11	1/301	0.610012	0.611888	1.07311	0.530416	NFE2L2
																																rhombomere 3	1/301	0.610012	0.611888	1.07311	0.530416	ELF4
																																rostral periolivary nucleus	1/301	0.610012	0.611888	1.07311	0.530416	MYC
																																septodiagonal transition area	1/301	0.610012	0.611888	1.07311	0.530416	AR
																																septopallidal core nucleus	1/301	0.610012	0.611888	1.07311	0.530416	KLF5
																																shell of SCH	1/301	0.610012	0.611888	1.07311	0.530416	NFIL3
																																shell part of the anterobasal nucleus	1/301	0.610012	0.611888	1.07311	0.530416	NFIL3
																																sublayer 6a of InsCx	1/301	0.610012	0.611888	1.07311	0.530416	FLI1
																																sublayer 6a of PCx	1/301	0.610012	0.611888	1.07311	0.530416	BHLHE40
																																sublayer 6b of FCx	1/301	0.610012	0.611888	1.07311	0.530416	NR3C1
																																sublayer 6b of InsCx	1/301	0.610012	0.611888	1.07311	0.530416	FLI1
																																subpretectal nucleus	1/301	0.610012	0.611888	1.07311	0.530416	TCF7L2
																																substantia innominata/basal nucleus, transitional part	1/301	0.610012	0.611888	1.07311	0.530416	AR
																																substantia nigra compacta, m1 part	1/301	0.610012	0.611888	1.07311	0.530416	FOXA1
																																substantia nigra reticulata, isthmic part	1/301	0.610012	0.611888	1.07311	0.530416	FOXA1
																																substantia nigra reticulata, m1 part	1/301	0.610012	0.611888	1.07311	0.530416	FOXA1
																																subthalamic nucleus (migrated)	1/301	0.610012	0.611888	1.07311	0.530416	SMAD2
																																superficial part of arcuate nucleus	1/301	0.610012	0.611888	1.07311	0.530416	KLF4
																																superficial stratum of CCx (cortical plate/marginal zone)	1/301	0.610012	0.611888	1.07311	0.530416	ERG
																																superficial stratum of CoPV	1/301	0.610012	0.611888	1.07311	0.530416	TCF7L2
																																superficial stratum of FCx (cortical plate/marginal zone)	1/301	0.610012	0.611888	1.07311	0.530416	PRDM1
																																superficial stratum of Mam	1/301	0.610012	0.611888	1.07311	0.530416	SMAD2
																																superficial stratum of Pal	1/301	0.610012	0.611888	1.07311	0.530416	NFE2
																																superficial stratum of PcPL	1/301	0.610012	0.611888	1.07311	0.530416	TCF7L2
																																superficial stratum of PcPV	1/301	0.610012	0.611888	1.07311	0.530416	TCF7L2
																																superficial stratum of RtC	1/301	0.610012	0.611888	1.07311	0.530416	FOXA2
																																superficial stratum of TG	1/301	0.610012	0.611888	1.07311	0.530416	SPDEF
																																superficial stratum of THyB-P	1/301	0.610012	0.611888	1.07311	0.530416	SMAD2
																																superficial stratum of THyB-V	1/301	0.610012	0.611888	1.07311	0.530416	AR
																																superficial stratum of TPaA	1/301	0.610012	0.611888	1.07311	0.530416	SOX17
																																superficial stratum of TSPaA	1/301	0.610012	0.611888	1.07311	0.530416	NFIL3
																																superficial stratum of isBI	1/301	0.610012	0.611888	1.07311	0.530416	FOXA1
																																superficial stratum of m1B	1/301	0.610012	0.611888	1.07311	0.530416	FOXA1
																																superficial stratum of m2B	1/301	0.610012	0.611888	1.07311	0.530416	FOXA1
																																superficial stratum of p1B	1/301	0.610012	0.611888	1.07311	0.530416	FOXA1
																																superficial stratum of r10BM	1/301	0.610012	0.611888	1.07311	0.530416	NFE2L2
																																superficial stratum of r11Tr	1/301	0.610012	0.611888	1.07311	0.530416	NFE2
																																superficial stratum of r1BI	1/301	0.610012	0.611888	1.07311	0.530416	POU5F1
																																superficial stratum of r2BI	1/301	0.610012	0.611888	1.07311	0.530416	POU5F1
																																superficial stratum of r2Lim	1/301	0.610012	0.611888	1.07311	0.530416	SPDEF
																																superficial stratum of r3BI	1/301	0.610012	0.611888	1.07311	0.530416	SMAD2
																																superficial stratum of r3BL	1/301	0.610012	0.611888	1.07311	0.530416	SMAD2
																																superficial stratum of r3BM	1/301	0.610012	0.611888	1.07311	0.530416	ELF4
																																superficial stratum of r4BM	1/301	0.610012	0.611888	1.07311	0.530416	ELF4
																																superficial stratum of r4Tr	1/301	0.610012	0.611888	1.07311	0.530416	PHOX2B
																																superficial stratum of r5BL	1/301	0.610012	0.611888	1.07311	0.530416	MYC
																																superficial stratum of r5Tr	1/301	0.610012	0.611888	1.07311	0.530416	PHOX2B
																																superficial stratum of r6Tr	1/301	0.610012	0.611888	1.07311	0.530416	PHOX2B
																																superficial stratum of r7Co	1/301	0.610012	0.611888	1.07311	0.530416	OTX2
																																superficial stratum of the VAP	1/301	0.610012	0.611888	1.07311	0.530416	NR2F1
																																superior periolivary nucleus	1/301	0.610012	0.611888	1.07311	0.530416	MYC
																																temporotympanic muscle trigeminal motor cell group	1/301	0.610012	0.611888	1.07311	0.530416	SPDEF
																																terete nucleus	1/301	0.610012	0.611888	1.07311	0.530416	SMAD2
																																terminal hypothalamus (rostral hypothalamus)	1/301	0.610012	0.611888	1.07311	0.530416	ESR1
																																terminal paraventricular area of THyA	1/301	0.610012	0.611888	1.07311	0.530416	ESR1
																																terminal subparaventricular area of THyA	1/301	0.610012	0.611888	1.07311	0.530416	ESR1
																																upper basal perifornical nucleus	1/301	0.610012	0.611888	1.07311	0.530416	AR
																																upper dorsal perifornical nucleus	1/301	0.610012	0.611888	1.07311	0.530416	ESR1
																																ventral juxtacommissural pretectal nucleus	1/301	0.610012	0.611888	1.07311	0.530416	TCF7L2
																																ventral pallidum	1/301	0.610012	0.611888	1.07311	0.530416	FOXA3
																																ventral part of JcP	1/301	0.610012	0.611888	1.07311	0.530416	TCF7L2
																																ventral part of PHyB	1/301	0.610012	0.611888	1.07311	0.530416	SOX2
																																ventral part of PcP	1/301	0.610012	0.611888	1.07311	0.530416	TCF7L2
																																ventral part of THyB	1/301	0.610012	0.611888	1.07311	0.530416	ESR1
																																ventral striatum	1/301	0.610012	0.611888	1.07311	0.530416	FOXA3
																																ventral tuberomammillary nucleus, intermediate part (histaminergic)	1/301	0.610012	0.611888	1.07311	0.530416	ESR1
																																ventral tuberomammillary nucleus, superficial part (histaminergic)	1/301	0.610012	0.611888	1.07311	0.530416	AR
																																ventrolateral part of VMH	1/301	0.610012	0.611888	1.07311	0.530416	AR
																																Claustrum	1/386	0.70185	0.703648	0.832574	0.294761	FLI1
																																Ventral tegmental nucleus	1/391	0.706533	0.70798	0.82169	0.285443	SOX2
																																Field CA2, stratum lacunosum-moleculare	1/421	0.733149	0.734275	0.761827	0.236476	TCF4
																																Tuberal nucleus	1/427	0.73818	0.738935	0.750866	0.227939	AR
																																Anterior tegmental nucleus	1/552	0.824118	0.824539	0.576805	0.111578	FOXA1
																																intermediate stratum of DG	1/597	0.847683	0.847683	0.532017	0.087915	LEF1

## Sheet: ltr7
48 TFs	Term	Overlap	P-value	Adjusted P-value	Odds Ratio	Combined Score	Genes	Allen Brain Atlas up				16 LTR7 brain marker TFs			16 LTR7 TFs	Term	Overlap	P-value	Adjusted P-value	Odds Ratio	Combined Score	Genes	Allen Brain Atlas up				72 TFs	Term	Overlap	P-value	Adjusted P-value	Odds Ratio	Combined Score	Genes	Allen Brain Atlas up				20 LTR7 TFs		20 LTR7 TFs	Term	Overlap	P-value	Adjusted P-value	Odds Ratio	Combined Score	Genes	Allen Brain Atlas up
	Anterior cingulate area, ventral part, layer 1	6/301	7.9728e-05	0.0338844	9.51913	89.831	YY1;PRDM1;KLF4;GATA1;USF2;GABPA	4 significant records				EOMES				Anterior cingulate area, ventral part, layer 1	6/301	7.79865e-08	1.76054e-05	40.0454	655.413	YY1;PRDM1;KLF4;GATA1;USF2;GABPA	99 significant records					Lateral visual area	7/301	0.000104081	0.0479031	7.19194	65.9526	EGR2;KLF5;ARNT;ATF7;NR3C1;HIF1A;GLIS1	4 significant records				ARNT			Lateral visual area	7/301	1.06903e-08	2.18083e-06	36.0549	661.75	EGR2;KLF5;ARNT;ATF7;NR3C1;HIF1A;GLIS1	150 significant records
	Infralimbic area, layer 2	6/301	7.9728e-05	0.0338844	9.51913	89.831	YY1;SOX17;PRDM1;HNF1A;GATA1;GABPA					ESR1				Infralimbic area, layer 2	6/301	7.79865e-08	1.76054e-05	40.0454	655.413	YY1;SOX17;HNF1A;PRDM1;GATA1;GABPA						Postsubiculum, layer 3	7/301	0.000104081	0.0479031	7.19194	65.9526	NR2F1;ATF7;TCF4;GATA3;NR3C1;KLF4;ETV5					ATF7			Postsubiculum, layer 3	7/301	1.06903e-08	2.18083e-06	36.0549	661.75	NR2F1;ATF7;TCF4;GATA3;KLF4;NR3C1;ETV5
	Striatum-like amygdalar nuclei	6/301	7.9728e-05	0.0338844	9.51913	89.831	SOX2;NR2F1;GATA3;ESR1;ESR2;NR2F6					ESR2				Striatum-like amygdalar nuclei	6/301	7.79865e-08	1.76054e-05	40.0454	655.413	SOX2;NR2F1;GATA3;ESR1;ESR2;NR2F6						Presubiculum, layer 3	7/301	0.000104081	0.0479031	7.19194	65.9526	KLF5;GLIS3;TCF4;GATA3;NR3C1;ETV5;FOSL2					CEBPA			Presubiculum, layer 3	7/301	1.06903e-08	2.18083e-06	36.0549	661.75	KLF5;GLIS3;TCF4;GATA3;NR3C1;ETV5;FOSL2
	lateral pallium	6/301	7.9728e-05	0.0338844	9.51913	89.831	YY1;EOMES;PRDM1;HNF1A;GATA1;GLIS1					GABPA				lateral pallium	6/301	7.79865e-08	1.76054e-05	40.0454	655.413	EOMES;YY1;HNF1A;PRDM1;GATA1;GLIS1						lateral pallium	7/301	0.000104081	0.0479031	7.19194	65.9526	YY1;EOMES;CEBPA;PRDM1;HNF1A;GATA1;GLIS1					EGR2			lateral pallium	7/301	1.06903e-08	2.18083e-06	36.0549	661.75	EOMES;YY1;CEBPA;HNF1A;PRDM1;GATA1;GLIS1
												GATA1				Infralimbic area	5/301	2.84735e-06	0.000257116	30.2334	386.054	YY1;SOX17;PRDM1;GATA1;GABPA																	EOMES			Anterolateral visual area	6/301	3.58787e-07	3.65963e-05	28.5981	424.411	EGR2;KLF5;ARNT;ATF7;NR3C1;GLIS1
												GATA3				Infralimbic area, layer 2/3	5/301	2.84735e-06	0.000257116	30.2334	386.054	YY1;HNF1A;PRDM1;GATA1;GABPA																	ETV5			Visual areas	6/301	3.58787e-07	3.65963e-05	28.5981	424.411	EGR2;KLF5;ARNT;ATF7;KLF4;NR3C1
												GLIS1				Orbital area, lateral part, layer 1	5/301	2.84735e-06	0.000257116	30.2334	386.054	EOMES;SOX17;HNF1A;PRDM1;GATA1											from 16 LTR7 TFs (from 48 TFs)						FOSL2			layer 3 of OCx	6/301	3.58787e-07	3.65963e-05	28.5981	424.411	EGR2;KLF5;ARNT;HNF1A;KLF4;NR3C1
												HNF1A				Orbital area, ventrolateral part	5/301	2.84735e-06	0.000257116	30.2334	386.054	EOMES;SOX17;HNF1A;PRDM1;GATA1											ESR1	from 16 LTR7 TFs					GATA1			layer 5 of PrS	6/301	3.58787e-07	3.65963e-05	28.5981	424.411	GLIS3;ATF7;TCF4;NR3C1;ETV5;FOSL2
												KLF4				Orbital area, ventrolateral part, layer 1	5/301	2.84735e-06	0.000257116	30.2334	386.054	EOMES;SOX17;HNF1A;PRDM1;GATA1											ESR2	from 16 LTR7 TFs					GATA3			Subiculum	6/389	1.6029e-06	0.00014533	21.9288	292.611	CEBPA;GLIS3;GATA3;NR3C1;GLIS1;FOSL2
												NR2F1				Orbital area, ventrolateral part, layer 2/3	5/301	2.84735e-06	0.000257116	30.2334	386.054	EOMES;SOX17;HNF1A;PRDM1;GATA1											GABPA	from 16 LTR7 TFs					GLIS1			Presubiculum	6/508	7.4628e-06	0.000436062	16.6289	196.314	KLF5;GLIS3;ATF7;TCF4;GATA3;NR3C1
												NR2F6				AOB, outer plexiform layer	4/301	7.93417e-05	0.00210722	22.0954	208.619	EOMES;HNF1A;PRDM1;GATA1											NR2F6	from 16 LTR7 TFs					GLIS3			Anterolateral visual area, layer 6a	5/301	9.61902e-06	0.000436062	22.1667	256.064	EGR2;ARNT;ATF7;NR3C1;GLIS1
												PRDM1				Anterior cingulate area	4/301	7.93417e-05	0.00210722	22.0954	208.619	YY1;PRDM1;GATA1;GABPA											SOX17	from 16 LTR7 TFs					HIF1A			Posterolateral visual area	5/301	9.61902e-06	0.000436062	22.1667	256.064	YY1;EGR2;KLF5;ARNT;NR3C1
												SOX17				Anterior cingulate area, ventral part	4/301	7.93417e-05	0.00210722	22.0954	208.619	YY1;PRDM1;GATA1;GABPA											SOX2	from 16 LTR7 TFs					HNF1A			Posterolateral visual area, layer 5	5/301	9.61902e-06	0.000436062	22.1667	256.064	YY1;EGR2;KLF5;ARNT;NR3C1
												SOX2				Anterior olfactory nucleus, dorsal part	4/301	7.93417e-05	0.00210722	22.0954	208.619	SOX17;HNF1A;PRDM1;GATA1											USF2	from 16 LTR7 TFs					KLF4			Posterolateral visual area, layer 6b	5/301	9.61902e-06	0.000436062	22.1667	256.064	KLF5;NR2F1;ARNT;GATA3;NR3C1
												USF2				Anterior olfactory nucleus, external part	4/301	7.93417e-05	0.00210722	22.0954	208.619	EOMES;HNF1A;PRDM1;GATA1																	KLF5			Presubiculum, layer 2	5/301	9.61902e-06	0.000436062	22.1667	256.064	KLF5;GLIS3;ATF7;TCF4;GATA3
												YY1				Anterior olfactory nucleus, layer 1	4/301	7.93417e-05	0.00210722	22.0954	208.619	SOX17;HNF1A;PRDM1;GATA1																	NR2F1			Primary visual area	5/301	9.61902e-06	0.000436062	22.1667	256.064	YY1;EGR2;KLF5;KLF4;NR3C1
																Medial amygdalar nucleus	4/301	7.93417e-05	0.00210722	22.0954	208.619	NR2F1;GATA3;ESR1;ESR2																	NR3C1			layer 3 of PrS	5/301	9.61902e-06	0.000436062	22.1667	256.064	GLIS3;ATF7;TCF4;NR3C1;FOSL2
																Medial amygdalar nucleus, anterodorsal part	4/301	7.93417e-05	0.00210722	22.0954	208.619	SOX2;NR2F1;GATA3;ESR1																	PRDM1			layer 6a of PaS	5/301	9.61902e-06	0.000436062	22.1667	256.064	NR2F1;TCF4;KLF4;NR3C1;ETV5
																Medial amygdalar nucleus, posterodorsal part	4/301	7.93417e-05	0.00210722	22.0954	208.619	NR2F1;GATA3;ESR1;ESR2																	TCF4			Parasubiculum	5/439	5.88016e-05	0.00252537	15.0123	146.24	KLF5;GLIS3;ATF7;TCF4;GATA3
																Medial amygdalar nucleus, posterodorsal part, sublayer a	4/301	7.93417e-05	0.00210722	22.0954	208.619	NR2F1;GATA3;ESR1;ESR2																	YY1			AOB, outer plexiform layer	4/301	0.000201416	0.00265089	16.5682	140.998	EOMES;HNF1A;PRDM1;GATA1
																Medial amygdalar nucleus, posterodorsal part, sublayer b	4/301	7.93417e-05	0.00210722	22.0954	208.619	NR2F1;GATA3;ESR1;ESR2																				Anterior cingulate area, ventral part, layer 1	4/301	0.000201416	0.00265089	16.5682	140.998	YY1;PRDM1;KLF4;GATA1
																Medial amygdalar nucleus, posterodorsal part, sublayer c	4/301	7.93417e-05	0.00210722	22.0954	208.619	NR2F1;GATA3;ESR1;ESR2																				Anterior olfactory nucleus, external part	4/301	0.000201416	0.00265089	16.5682	140.998	EOMES;HNF1A;PRDM1;GATA1
																Orbital area	4/301	7.93417e-05	0.00210722	22.0954	208.619	EOMES;SOX17;PRDM1;GATA1																				Anterolateral visual area, layer 5	4/301	0.000201416	0.00265089	16.5682	140.998	EGR2;ARNT;ATF7;GLIS1
																Orbital area, lateral part	4/301	7.93417e-05	0.00210722	22.0954	208.619	EOMES;SOX17;PRDM1;GATA1																				Cerebral cortex	4/301	0.000201416	0.00265089	16.5682	140.998	EOMES;YY1;EGR2;TCF4
																Orbital area, lateral part, layer 2/3	4/301	7.93417e-05	0.00210722	22.0954	208.619	EOMES;SOX17;PRDM1;GATA1																				Cortical plate	4/301	0.000201416	0.00265089	16.5682	140.998	EOMES;YY1;EGR2;TCF4
																Orbital area, medial part, layer 2	4/301	7.93417e-05	0.00210722	22.0954	208.619	SOX17;HNF1A;PRDM1;GATA1																				Ectorhinal area	4/301	0.000201416	0.00265089	16.5682	140.998	KLF5;PRDM1;HIF1A;GLIS1
																Taenia tecta, dorsal part	4/301	7.93417e-05	0.00210722	22.0954	208.619	SOX17;GATA1;ESR2;GABPA																				Ectorhinal area/Layer 6a	4/301	0.000201416	0.00265089	16.5682	140.998	KLF5;NR3C1;HIF1A;GLIS1
																Taenia tecta, dorsal part, layer 1	4/301	7.93417e-05	0.00210722	22.0954	208.619	SOX17;GATA1;ESR2;GABPA																				Infralimbic area, layer 2	4/301	0.000201416	0.00265089	16.5682	140.998	YY1;HNF1A;PRDM1;GATA1
																anterior olfactory area, dorsal part	4/301	7.93417e-05	0.00210722	22.0954	208.619	SOX17;HNF1A;PRDM1;GATA1																				Infralimbic area, layer 2/3	4/301	0.000201416	0.00265089	16.5682	140.998	YY1;HNF1A;PRDM1;GATA1
																intermediate stratum of AOB	4/301	7.93417e-05	0.00210722	22.0954	208.619	EOMES;HNF1A;PRDM1;GATA1																				Lateral amygdalar nucleus	4/301	0.000201416	0.00265089	16.5682	140.998	YY1;CEBPA;HIF1A;GLIS1
																layer 1 of AOD cortex	4/301	7.93417e-05	0.00210722	22.0954	208.619	SOX17;HNF1A;PRDM1;GATA1																				Lateral visual area, layer 6a	4/301	0.000201416	0.00265089	16.5682	140.998	KLF5;ARNT;NR3C1;GLIS1
																mantle zone of AOD	4/301	7.93417e-05	0.00210722	22.0954	208.619	SOX17;HNF1A;PRDM1;GATA1																				Orbital area, lateral part, layer 1	4/301	0.000201416	0.00265089	16.5682	140.998	EOMES;HNF1A;PRDM1;GATA1
																subpallial amygdala	4/301	7.93417e-05	0.00210722	22.0954	208.619	SOX2;NR2F1;ESR1;ESR2																				Orbital area, ventrolateral part	4/301	0.000201416	0.00265089	16.5682	140.998	EOMES;HNF1A;PRDM1;GATA1
																superficial stratum of AOD	4/301	7.93417e-05	0.00210722	22.0954	208.619	SOX17;HNF1A;PRDM1;GATA1																				Orbital area, ventrolateral part, layer 1	4/301	0.000201416	0.00265089	16.5682	140.998	EOMES;HNF1A;PRDM1;GATA1
																Bed nucleus of the anterior commissure	4/450	0.000371243	0.00957807	14.6024	115.339	SOX2;PRDM1;ESR1;ESR2																				Orbital area, ventrolateral part, layer 2/3	4/301	0.000201416	0.00265089	16.5682	140.998	EOMES;HNF1A;PRDM1;GATA1
																AOB, glomerular layer	3/301	0.0016343	0.0155345	15.2447	97.8183	EOMES;PRDM1;GATA1																				Parasubiculum, layer 3	4/301	0.000201416	0.00265089	16.5682	140.998	KLF5;GLIS3;TCF4;GATA3
																AOB, internal plexiform layer	3/301	0.0016343	0.0155345	15.2447	97.8183	EOMES;PRDM1;GATA1																				Posterolateral visual area, layer 4	4/301	0.000201416	0.00265089	16.5682	140.998	YY1;EGR2;ARNT;GLIS1
																Accessory olfactory bulb, glomerular layer	3/301	0.0016343	0.0155345	15.2447	97.8183	EOMES;HNF1A;PRDM1																				Posterolateral visual area, layer 6a	4/301	0.000201416	0.00265089	16.5682	140.998	KLF5;ARNT;GATA3;NR3C1
																Agranular insular area, dorsal part, layer 1	3/301	0.0016343	0.0155345	15.2447	97.8183	YY1;HNF1A;GLIS1																				Primary somatosensory area, barrel field	4/301	0.000201416	0.00265089	16.5682	140.998	YY1;KLF5;ARNT;ATF7
																Anterior olfactory nucleus	3/301	0.0016343	0.0155345	15.2447	97.8183	HNF1A;PRDM1;GATA1																				Primary somatosensory area, barrel field, layer 4	4/301	0.000201416	0.00265089	16.5682	140.998	KLF5;ARNT;ATF7;GLIS1
																Anterior olfactory nucleus, lateral part	3/301	0.0016343	0.0155345	15.2447	97.8183	HNF1A;PRDM1;GATA1																				Primary visual area, layer 4	4/301	0.000201416	0.00265089	16.5682	140.998	YY1;EGR2;KLF5;KLF4
																Basic cell groups and regions	3/301	0.0016343	0.0155345	15.2447	97.8183	EOMES;GATA3;NR2F6																				Retrohippocampal region	4/301	0.000201416	0.00265089	16.5682	140.998	CEBPA;TCF4;GATA3;GLIS1
																Basomedial amygdalar nucleus	3/301	0.0016343	0.0155345	15.2447	97.8183	NR2F1;GATA3;ESR1																				Subiculum, dorsal part, pyramidal layer	4/301	0.000201416	0.00265089	16.5682	140.998	GLIS3;TCF4;NR3C1;ETV5
																Bed nuclei of the stria terminalis, posterior division	3/301	0.0016343	0.0155345	15.2447	97.8183	NR2F1;ESR1;ESR2																				Subiculum, ventral part	4/301	0.000201416	0.00265089	16.5682	140.998	CEBPA;GATA3;GLIS1;FOSL2
																Bed nuclei of the stria terminalis, posterior division, interfascicular nucleus	3/301	0.0016343	0.0155345	15.2447	97.8183	NR2F1;ESR1;ESR2																				Temporal association areas	4/301	0.000201416	0.00265089	16.5682	140.998	KLF5;NR3C1;HIF1A;GLIS1
																Bed nuclei of the stria terminalis, posterior division, principal nucleus	3/301	0.0016343	0.0155345	15.2447	97.8183	SOX2;ESR1;ESR2																				Temporal association areas, layer 5	4/301	0.000201416	0.00265089	16.5682	140.998	CEBPA;NR3C1;HIF1A;GLIS1
																Bed nuclei of the stria terminalis, posterior division, transverse nucleus	3/301	0.0016343	0.0155345	15.2447	97.8183	NR2F1;ESR1;ESR2																				Temporal association areas, layer 6a	4/301	0.000201416	0.00265089	16.5682	140.998	CEBPA;ATF7;NR3C1;GLIS1
																Cortical amygdalar area, posterior part, medial zone	3/301	0.0016343	0.0155345	15.2447	97.8183	NR2F1;ESR1;NR2F6																				intermediate stratum of AOB	4/301	0.000201416	0.00265089	16.5682	140.998	EOMES;HNF1A;PRDM1;GATA1
																Cortical subplate	3/301	0.0016343	0.0155345	15.2447	97.8183	NR2F1;GATA3;NR2F6																				lateral amygdaloid nucleus	4/301	0.000201416	0.00265089	16.5682	140.998	YY1;CEBPA;HIF1A;GLIS1
																Dorsal nucleus raphe	3/301	0.0016343	0.0155345	15.2447	97.8183	GATA3;ESR1;ESR2																				layer 3 of RSC	4/301	0.000201416	0.00265089	16.5682	140.998	NR2F1;ARNT;ATF7;TCF4
																Dorsal peduncular area, layer 1	3/301	0.0016343	0.0155345	15.2447	97.8183	SOX17;ESR2;GABPA																				layer 5 of PaS	4/301	0.000201416	0.00265089	16.5682	140.998	KLF5;TCF4;NR3C1;ETV5
																Dorsal peduncular area, layer 2/3	3/301	0.0016343	0.0155345	15.2447	97.8183	YY1;SOX17;GABPA																				layer 6 of PaS	4/301	0.000201416	0.00265089	16.5682	140.998	NR2F1;TCF4;NR3C1;ETV5
																Entorhinal area, medial part, dorsal zone	3/301	0.0016343	0.0155345	15.2447	97.8183	GATA3;GLIS1;NR2F6																				layer 6 of RSC	4/301	0.000201416	0.00265089	16.5682	140.998	NR2F1;ARNT;NR3C1;ETV5
																Gustatory areas, layer 1	3/301	0.0016343	0.0155345	15.2447	97.8183	YY1;HNF1A;GLIS1																				layer 6b of PaS	4/301	0.000201416	0.00265089	16.5682	140.998	NR2F1;TCF4;NR3C1;ETV5
																Gustatory areas, layer 2/3	3/301	0.0016343	0.0155345	15.2447	97.8183	YY1;HNF1A;GLIS1																				layer 6b of RSC	4/301	0.000201416	0.00265089	16.5682	140.998	NR2F1;KLF4;NR3C1;ETV5
																Infralimbic area, layer 1	3/301	0.0016343	0.0155345	15.2447	97.8183	SOX17;PRDM1;GABPA																				mantle zone of OCx	4/301	0.000201416	0.00265089	16.5682	140.998	EGR2;ARNT;KLF4;NR3C1
																Infralimbic area, layer 5	3/301	0.0016343	0.0155345	15.2447	97.8183	YY1;PRDM1;GATA1																				mantle zone of PrS	4/301	0.000201416	0.00265089	16.5682	140.998	KLF5;GLIS3;TCF4;NR3C1
																Midbrain, behavioral state related	3/301	0.0016343	0.0155345	15.2447	97.8183	GATA3;ESR2;NR2F6																				mantle zone of S	4/301	0.000201416	0.00265089	16.5682	140.998	CEBPA;GLIS3;NR3C1;GLIS1
																Paraventricular hypothalamic nucleus	3/301	0.0016343	0.0155345	15.2447	97.8183	SOX2;ESR1;ESR2																				occipital cortex	4/301	0.000201416	0.00265089	16.5682	140.998	EGR2;ARNT;KLF4;NR3C1
																Paraventricular hypothalamic nucleus, descending division	3/301	0.0016343	0.0155345	15.2447	97.8183	KLF4;ESR1;ESR2																				superficial stratum of OCx (cortical plate/marginal zone)	4/301	0.000201416	0.00265089	16.5682	140.998	EGR2;ARNT;KLF4;NR3C1
																Paraventricular hypothalamic nucleus, descending division, lateral parvicellular part	3/301	0.0016343	0.0155345	15.2447	97.8183	KLF4;ESR1;ESR2																				superficial stratum of PrS (cortical plate/marginal zone)	4/301	0.000201416	0.00265089	16.5682	140.998	KLF5;GLIS3;TCF4;NR3C1
																Paraventricular hypothalamic nucleus, parvicellular division	3/301	0.0016343	0.0155345	15.2447	97.8183	SOX2;ESR1;ESR2																				superficial stratum of S	4/301	0.000201416	0.00265089	16.5682	140.998	CEBPA;GLIS3;NR3C1;GLIS1
																Paraventricular hypothalamic nucleus, parvicellular division, anterior parvicellular part	3/301	0.0016343	0.0155345	15.2447	97.8183	SOX2;ESR1;ESR2																				AOB, glomerular layer	3/301	0.00318224	0.0176647	11.6553	67.0203	EOMES;PRDM1;GATA1
																Postsubiculum, layer 3	3/301	0.0016343	0.0155345	15.2447	97.8183	NR2F1;GATA3;KLF4																				AOB, internal plexiform layer	3/301	0.00318224	0.0176647	11.6553	67.0203	EOMES;PRDM1;GATA1
																Primary visual area	3/301	0.0016343	0.0155345	15.2447	97.8183	YY1;KLF4;NR2F6																				Accessory olfactory bulb, glomerular layer	3/301	0.00318224	0.0176647	11.6553	67.0203	EOMES;HNF1A;PRDM1
																Retrohippocampal region	3/301	0.0016343	0.0155345	15.2447	97.8183	GATA3;GLIS1;NR2F6																				Agranular insular area, dorsal part, layer 1	3/301	0.00318224	0.0176647	11.6553	67.0203	YY1;HNF1A;GLIS1
																Subparaventricular zone	3/301	0.0016343	0.0155345	15.2447	97.8183	SOX2;KLF4;ESR1																				Agranular insular area, posterior part	3/301	0.00318224	0.0176647	11.6553	67.0203	CEBPA;HNF1A;GLIS1
																Taenia tecta, dorsal part, layer 2	3/301	0.0016343	0.0155345	15.2447	97.8183	SOX17;GATA1;GABPA																				Anterior cingulate area	3/301	0.00318224	0.0176647	11.6553	67.0203	YY1;PRDM1;GATA1
																Taenia tecta, ventral part	3/301	0.0016343	0.0155345	15.2447	97.8183	EOMES;SOX17;GABPA																				Anterior cingulate area, ventral part	3/301	0.00318224	0.0176647	11.6553	67.0203	YY1;PRDM1;GATA1
																dorsal part of alar p3	3/301	0.0016343	0.0155345	15.2447	97.8183	EOMES;SOX2;ESR2																				Anterior olfactory nucleus	3/301	0.00318224	0.0176647	11.6553	67.0203	HNF1A;PRDM1;GATA1
																dorsolateral isthmic part of the dorsal raphe nucleus	3/301	0.0016343	0.0155345	15.2447	97.8183	GATA3;ESR1;ESR2																				Anterior olfactory nucleus, dorsal part	3/301	0.00318224	0.0176647	11.6553	67.0203	HNF1A;PRDM1;GATA1
																external part of AOD	3/301	0.0016343	0.0155345	15.2447	97.8183	HNF1A;PRDM1;GATA1																				Anterior olfactory nucleus, lateral part	3/301	0.00318224	0.0176647	11.6553	67.0203	HNF1A;PRDM1;GATA1
																hypothalamic amygdala	3/301	0.0016343	0.0155345	15.2447	97.8183	NR2F1;ESR1;ESR2																				Anterior olfactory nucleus, layer 1	3/301	0.00318224	0.0176647	11.6553	67.0203	HNF1A;PRDM1;GATA1
																intercalated amygdaloid nuclei	3/301	0.0016343	0.0155345	15.2447	97.8183	NR2F1;ESR1;ESR2																				Anterior olfactory nucleus, medial part	3/301	0.00318224	0.0176647	11.6553	67.0203	HNF1A;GATA1;FOSL2
[truncated: 829 more rows]

## Sheet: mlt2a1
7 TFs	Term	Overlap	P-value	Adjusted P-value	Odds Ratio	Combined Score	Genes	Allen Brain Atlas up			6 mlt2a1 TFs		6 mlt2a1 TFs	Term	Overlap	P-value	Adjusted P-value	Odds Ratio	Combined Score	Genes	Allen Brain Atlas up			10 mlt2a1 TFs	Term	Overlap	P-value	Adjusted P-value	Odds Ratio	Combined Score	Genes	Allen Brain Atlas up			7 mlt2a1 TFs		7 mlt2a1 TFs	Term	Overlap	P-value	Adjusted P-value	Odds Ratio	Combined Score	Genes	Allen Brain Atlas up
[truncated: 522 more rows]

[truncated: 19 more sheets: mlt2a2, line1, top25tfs, hBrEnh, hBrOrgEnh, AInet25TFs, Sheet1, RECE, HARs, haqers, 119TFsaturation, 90TFs, 90enr, 110TFs, 1029, 716TFs, 545TFs, 171, Nucleosomes]
